# Supplementary material for: Mycobacterium bovis BCG Surface Antigens Expressed under the Granuloma-Like Conditions as Potential Inducers of the Protective Immunity
Source: Int J Microbiol. 2019 Jun 3;2019:9167271. doi: 10.1155/2019/9167271 (PMC6589241; doi:10.1155/2019/9167271)
Supplement: Supplementary Materials — BCG surface proteins isolated from bacteria growing in granuloma-like conditions. The proteins are organized by the number of peptides sequenced. [file 9167271.f1.xlsx]

## Sheet: Granuloma-lika Condition
Checked	Protein FDR Confidence	Master	Accession	Description	Exp. q-value	Sum PEP Score	Coverage	# Peptides	# PSMs	# Unique Peptides	# Protein Groups	# AAs	MW [kDa]	calc. pI	Score Sequest HT	# Peptides Sequest HT
FALSE	High	Master Protein	A0A083WLG7	60 kDa chaperonin OS=Mycobacterium bovis GN=groEL PE=3 SV=1	0	381.529	86.4815	49	118	48	1	540	56.692	4.92	338.739	49
FALSE	High	Master Protein	G7QWY8	Elongation factor Tu OS=Mycobacterium bovis BCG str. Mexico GN=tuf PE=3 SV=1	0	218.902	84.8485	27	55	27	1	396	43.566	5.45	142.906	27
FALSE	High	Master Protein	G8FRU6	60 kDa chaperonin OS=Mycobacterium bovis BCG str. Mexico GN=groEL2 PE=3 SV=1	0	154.214	54.5455	25	38	24	1	539	55.843	5.12	109.736	25
FALSE	High	Master Protein	A0A0H3MGR2	Probable multifunctional mycocerosic acid synthase membrane-associated mas OS=Mycobacterium bovis (strain BCG / Pasteur 1173P2) GN=mas PE=4 SV=1	0	131.663	28.8489	35	42	33	1	2111	224.256	5.21	92.4425	35
FALSE	High	Master Protein	P65341	5-methyltetrahydropteroyltriglutamate--homocysteine methyltransferase OS=Mycobacterium bovis (strain ATCC BAA-935 / AF2122/97) GN=metE PE=3 SV=1	0	128.47	27.9315	19	32	19	1	759	81.531	5.29	81.3263	19
FALSE	High	Master Protein	A0A083W510	Alpha-hydroxy-acid oxidizing enzyme OS=Mycobacterium bovis GN=BOVR_09725 PE=4 SV=1	0	122.746	57.0048	20	35	20	1	414	45.299	9.7	85.7809	20
FALSE	High	Master Protein	A0A0H3P8B3	Conserved protein OS=Mycobacterium bovis (strain ATCC BAA-935 / AF2122/97) GN=Mb1822 PE=4 SV=1	0	120.372	68	17	28	17	1	300	32.379	5.05	86.4957	17
FALSE	High	Master Protein	A0A083WJS5	DNA-directed RNA polymerase subunit beta' OS=Mycobacterium bovis GN=rpoC PE=3 SV=1	0	120.195	39.2097	32	40	32	1	1316	146.678	6.2	82.7356	32
FALSE	High	Master Protein	A0A0H3MDR9	D-3-phosphoglycerate dehydrogenase OS=Mycobacterium bovis (strain BCG / Pasteur 1173P2) GN=serA1 PE=3 SV=1	0	113.23	59.4697	19	27	19	1	528	54.521	4.96	72.3133	19
FALSE	High	Master Protein	A0A083VWF2	Acetyl-/propionyl-CoA carboxylase subunit alpha OS=Mycobacterium bovis GN=BOVR_17025 PE=4 SV=1	0	109.58	61.5	22	34	22	1	600	63.744	5.73	70.5121	22
FALSE	High	Master Protein	A0A0K2HRP0	Chaperone protein DnaK OS=Mycobacterium bovis BCG GN=dnaK PE=2 SV=1	0	107.736	55.52	24	32	24	1	625	66.79	4.97	72.5764	24
FALSE	High	Master Protein	A0A0Y1BYR9	Cysteine desulfurase OS=Mycobacterium bovis BCG GN=RN06_1817 PE=3 SV=1	0	106.933	56.2865	21	35	11	1	684	73.511	5.96	71.6171	21
FALSE	High	Master Protein	Q7TTR2	Long-chain-fatty-acid--AMP ligase FadD32 OS=Mycobacterium bovis (strain ATCC BAA-935 / AF2122/97) GN=fadD32 PE=3 SV=1	0	103.167	53.8462	23	33	23	1	637	69.217	6.18	64.7709	23
FALSE	High	Master Protein	A0A0H3M6V0	3-oxoacyl-[acyl-carrier protein] synthase 2 kasB OS=Mycobacterium bovis (strain BCG / Pasteur 1173P2) GN=kasB PE=3 SV=1	0	102.261	58.9041	14	30	14	1	438	46.392	5.49	70.5919	14
FALSE	High	Master Protein	A0A0K2HXK0	Uncharacterized protein OS=Mycobacterium bovis BCG GN=RN06_2736 PE=4 SV=1	0	101.703	43.0799	17	25	17	1	513	56.298	6.67	70.9428	17
FALSE	High	Master Protein	A0A0H3P1M4	PROBABLE 3-OXOACYL-[ACYL-CARRIER PROTEIN] REDUCTASE FABG4 (3-KETOACYL-ACYL CARRIER PROTEIN REDUCTASE) OS=Mycobacterium bovis (strain ATCC BAA-935 / AF2122/97) GN=fabG4 PE=4 SV=1	0	100.566	68.0617	18	30	18	1	454	46.801	6.46	70.2462	18
FALSE	High	Master Protein	Q7TYJ1	Trigger factor OS=Mycobacterium bovis (strain ATCC BAA-935 / AF2122/97) GN=tig PE=3 SV=1	0	95.1696	54.0773	19	28	19	1	466	50.602	4.55	64.43	19
FALSE	High	Master Protein	A0A0H3P3B7	30s ribosomal protein s1 rpsa OS=Mycobacterium bovis (strain ATCC BAA-935 / AF2122/97) GN=rpsA PE=4 SV=1	0	94.0014	46.9854	19	28	19	1	481	53.199	4.93	68.3126	19
FALSE	High	Master Protein	A1KI96	ATP synthase subunit alpha OS=Mycobacterium bovis (strain BCG / Pasteur 1173P2) GN=atpA PE=3 SV=1	0	93.7558	47.9053	22	28	22	1	549	59.252	5.15	69.2167	22
FALSE	High	Master Protein	A0A093P6H0	Phthiocerol synthesis polyketide synthase type I PpsE (Beta-ketoacyl-acyl-carrier-protein synthase I) (EC 2. 3.1.41) OS=Mycobacterium bovis GN=MBO1_02701 PE=4 SV=1	0	93.2164	26.8145	26	34	26	1	1488	158.648	5.71	72.2389	26
FALSE	High	Master Protein	A0A0K2I0Q3	Adenosylhomocysteinase OS=Mycobacterium bovis BCG GN=ahcY PE=3 SV=1	0	92.8278	39.596	17	26	17	1	495	54.289	5.22	46.9675	17
FALSE	High	Master Protein	A0A0H3MAE5	Probable transcriptional regulatory protein moxR1 OS=Mycobacterium bovis (strain BCG / Pasteur 1173P2) GN=moxR1 PE=4 SV=1	0	89.4522	74.2706	20	33	19	1	377	40.738	6.39	67.9686	20
FALSE	High	Master Protein	A0A083WAR4	ATP synthase subunit beta OS=Mycobacterium bovis GN=atpD PE=3 SV=1	0	88.2815	60.6996	18	29	18	1	486	53.061	4.97	59.5373	18
FALSE	High	Master Protein	A0A0C7DTA4	FAD flavoprotein oxidase, putative (Probable succ inate dehydrogenase [iron-sulfur subunit] (Succinic dehydro genase)) OS=Mycobacterium bovis GN=MBO_303194 PE=4 SV=1	0	88.0911	42.7245	21	26	21	1	646	70.694	5.87	54.2899	21
FALSE	High	Master Protein	A0A0G2Q9I2	Possible short-chain dehydrogenase/reductase OS=Mycobacterium bovis (strain BCG / Pasteur 1173P2) GN=BCG_3252 PE=4 SV=1	0	88.037	57.8014	17	28	17	1	282	29.795	5.49	65.7672	17
FALSE	High	Master Protein	A1KGE7	DNA-directed RNA polymerase subunit beta OS=Mycobacterium bovis (strain BCG / Pasteur 1173P2) GN=rpoB PE=3 SV=2	0	87.008	35.4839	26	32	26	1	1178	129.784	5.03	71.689	26
FALSE	High	Master Protein	P66780	Uncharacterized oxidoreductase Mb1570 OS=Mycobacterium bovis (strain ATCC BAA-935 / AF2122/97) GN=Mb1570 PE=3 SV=1	0	86.6431	56.8915	17	27	17	1	341	36.798	8.98	53.0569	17
FALSE	High	Master Protein	A1KMU5	Phthiodiolone/phenolphthiodiolone dimycocerosates ketoreductase OS=Mycobacterium bovis (strain BCG / Pasteur 1173P2) GN=BCG_2972c PE=3 SV=1	0	85.821	77.4278	19	26	19	1	381	41.322	9.07	62.7274	19
FALSE	High	Master Protein	A0A083VTZ0	DNA-directed RNA polymerase subunit alpha OS=Mycobacterium bovis GN=rpoA PE=3 SV=1	0	85.7283	64.5533	19	26	19	1	347	37.683	4.75	59.6422	19
FALSE	High	Master Protein	A0A0H3M2H1	Uncharacterized protein OS=Mycobacterium bovis (strain BCG / Pasteur 1173P2) GN=BCG_0573 PE=4 SV=1	0	84.6246	64.6914	17	23	17	1	405	43.028	7.3	48.0872	17
FALSE	High	Master Protein	A1KMU7	Trans-acting enoyl reductase OS=Mycobacterium bovis (strain BCG / Pasteur 1173P2) GN=BCG_2974 PE=3 SV=1	0	79.9869	55.7416	17	21	16	1	418	45.076	9.11	51.9371	17
FALSE	High	Master Protein	A0A0H3MF34	3-oxoacyl-[acyl-carrier protein] synthase 1 kasA OS=Mycobacterium bovis (strain BCG / Pasteur 1173P2) GN=kasA PE=3 SV=1	0	79.553	68.2692	13	24	13	1	416	43.289	5.29	54.549	13
FALSE	High	Master Protein	A0A0K2I1X0	ATP-dependent protease ATP-binding subunit ClpC OS=Mycobacterium bovis BCG GN=RN06_4397 PE=4 SV=1	0	77.667	35.967	20	25	19	1	848	93.495	5.88	54.1951	20
FALSE	High	Master Protein	A0A083WJU2	Elongation factor G OS=Mycobacterium bovis GN=fusA PE=3 SV=1	0	77.6019	47.2183	19	22	19	1	701	77.154	5.06	55.7587	19
FALSE	High	Master Protein	C1AMN4	Malate dehydrogenase OS=Mycobacterium bovis (strain BCG / Tokyo 172 / ATCC 35737 / TMC 1019) GN=mdh PE=3 SV=1	0	75.7767	57.4468	16	21	16	1	329	34.301	4.79	58.6233	16
FALSE	High	Master Protein	A0A0C7DG67	Uncharacterized protein OS=Mycobacterium bovis GN=MBO1_01943 PE=4 SV=1	0	75.0586	57.0492	13	18	13	1	305	33.864	6.25	48.2203	13
FALSE	High	Master Protein	A0A0H3M6S8	Glutamine synthetase OS=Mycobacterium bovis (strain BCG / Pasteur 1173P2) GN=glnA1 PE=3 SV=1	0	74.805	44.9791	15	23	15	1	478	53.536	5.22	63.4933	15
FALSE	High	Master Protein	A0A083WDV3	Acyl-CoA dehydrogenase OS=Mycobacterium bovis GN=BOVR_04615 PE=3 SV=1	0	74.2208	39.3846	18	22	18	1	650	70.701	5.9	50.4929	18
FALSE	High	Master Protein	A0A0C7DKB2	Group 1 truncated hemoglobin GlbN (Truncated hemo globin) (TrHbN) (Hemoglobin-like protein HbN) OS=Mycobacterium bovis GN=MBO_300348 PE=4 SV=1	0	69.912	54.4118	6	14	6	1	136	14.429	6.05	49.9841	6
FALSE	High	Master Protein	A0A109S7U3	Malate synthase G OS=Mycobacterium bovis BCG GN=glcB PE=3 SV=1	0	67.9056	35.3576	16	20	16	1	741	80.353	5.22	40.9034	16
FALSE	High	Master Protein	A0A0C7DFW4	Putative integration host factor MihF OS=Mycobacterium bovis GN=MBO1_02487 PE=4 SV=1	0	66.4783	26.3158	10	17	10	1	190	20.822	10.33	40.6845	10
FALSE	High	Master Protein	A0A0K2HS13	3-hydroxybutyryl-CoA dehydrogenase OS=Mycobacterium bovis BCG GN=RN06_0578 PE=4 SV=1	0	66.149	58.7413	11	21	11	1	286	30.709	5.31	53.2405	11
FALSE	High	Master Protein	Q7TXM1	Long-chain-fatty-acid--AMP ligase FadD26 OS=Mycobacterium bovis (strain ATCC BAA-935 / AF2122/97) GN=fadD26 PE=1 SV=1	0	65.5414	52.8302	17	21	17	1	583	62.972	6.28	46.1072	17
FALSE	High	Master Protein	A0A0M4NHJ4	Uncharacterized protein OS=Mycobacterium bovis GN=BOVR_14065 PE=4 SV=1	0	65.5122	36.7668	12	17	12	1	699	72.327	4.64	46.6823	12
FALSE	High	Master Protein	A0A0C7DC16	4-hydroxy-3-methylbut-2-en-1-yl diphosphate synthase (flavodoxin) OS=Mycobacterium bovis GN=ispG PE=3 SV=1	0	65.4282	63.0491	15	21	15	1	387	40.427	5.26	49.0691	15
FALSE	High	Master Protein	A0A0H4XZ09	L-lysine 6-transaminase OS=Mycobacterium bovis GN=BOVR_17050 PE=4 SV=1	0	65.1476	48.9978	12	20	12	1	449	48.981	6	46.9855	12
FALSE	High	Master Protein	A0A0C7D9V8	Hydroxymycolate synthase MmaA4 (Myco lic acid methyltransferase) (MA-MT) (S-adenosylmethionine-d ependent methyltransferase) (AdoMet-MT) (SAM-MT) OS=Mycobacterium bovis GN=MBO1_00472 PE=4 SV=1	0	64.5949	57.8073	14	17	13	1	301	34.614	5.71	42.5874	14
FALSE	High	Master Protein	A0A0H3MC20	Polyketide synthase pks13 OS=Mycobacterium bovis (strain BCG / Pasteur 1173P2) GN=pks13 PE=4 SV=1	0	63.5714	21.6965	18	20	18	1	1733	186.343	4.96	52.1562	18
FALSE	High	Master Protein	A0A083W8L8	ABC transporter, ATP-binding protein (Probable co nserved ATP-binding protein ABC transporter) OS=Mycobacterium bovis GN=sufC PE=4 SV=1	0	62.2071	67.2932	11	20	1	1	266	28.805	6.14	45.4592	11
FALSE	High	Master Protein	A0A083WIP8	Probable dehydrogenase/reductase OS=Mycobacterium bovis GN=BOVR_02285 PE=4 SV=1	0	60.633	47.91	9	14	8	1	311	33.629	9.66	39.408	9
FALSE	High	Master Protein	A0A0Y1CK43	Cell wall synthesis protein Wag31 OS=Mycobacterium bovis BCG GN=RN06_2632 PE=4 SV=1	0	60.503	40.3846	12	16	12	1	260	28.26	4.89	38.489	12
FALSE	High	Master Protein	A0A0H3P2Z4	PROBABLE FATTY-ACID-COA LIGASE FADD6 (FATTY-ACID-COA SYNTHETASE) (FATTY-ACID-COA SYNTHASE) OS=Mycobacterium bovis (strain ATCC BAA-935 / AF2122/97) GN=fadD6 PE=4 SV=1	0	60.0323	43.8861	17	18	17	1	597	64.297	7.91	39.4502	17
FALSE	High	Master Protein	A0A0H3MDP0	Phenolpthiocerol synthesis type-I polyketide synthase ppsB OS=Mycobacterium bovis (strain BCG / Pasteur 1173P2) GN=ppsB PE=4 SV=1	0	59.7352	19.3758	15	19	13	1	1538	162.413	5.33	38.8355	15
FALSE	High	Master Protein	P15020	10 kDa chaperonin OS=Mycobacterium bovis (strain ATCC BAA-935 / AF2122/97) GN=groS PE=1 SV=4	0	59.5606	89	10	27	10	1	100	10.798	4.7	58.9606	10
FALSE	High	Master Protein	Q7U0N6	Fumarate hydratase class II OS=Mycobacterium bovis (strain ATCC BAA-935 / AF2122/97) GN=fumC PE=3 SV=1	0	58.7705	31.8565	10	14	10	1	474	50.11	5.52	39.2435	10
FALSE	High	Master Protein	A0A0H3MAR7	Two component sensory transduction transcriptional regulatory protein mtrA OS=Mycobacterium bovis (strain BCG / Pasteur 1173P2) GN=mtrA PE=4 SV=1	0	58.3898	67.5439	10	19	10	1	228	25.263	5.55	34.2362	10
FALSE	High	Master Protein	P0A4X1	NADP-dependent alcohol dehydrogenase C OS=Mycobacterium bovis (strain ATCC BAA-935 / AF2122/97) GN=adhC PE=3 SV=1	0	58.234	47.9769	13	16	13	1	346	37.052	5.3	37.6101	13
FALSE	High	Master Protein	A0A0H3P829	PROBABLE PROPIONYL-COA CARBOXYLASE BETA CHAIN 4 ACCD4 (PCCASE) (PROPANOYL-COA:CARBON DIOXIDE LIGASE) OS=Mycobacterium bovis (strain ATCC BAA-935 / AF2122/97) GN=accD4 PE=4 SV=1	0	57.9125	34.2912	11	18	11	1	522	56.644	5.57	39.7168	11
FALSE	High	Master Protein	Q7TXL8	Phthiocerol/phenolphthiocerol synthesis polyketide synthase type I PpsC OS=Mycobacterium bovis (strain ATCC BAA-935 / AF2122/97) GN=ppsC PE=1 SV=1	0	57.7268	14.1225	16	18	15	1	2188	230.479	5.24	37.5333	16
FALSE	High	Master Protein	A0A0H3M7U0	Phenolpthiocerol synthesis type-I polyketide synthase ppsA OS=Mycobacterium bovis (strain BCG / Pasteur 1173P2) GN=ppsA PE=4 SV=1	0	56.7055	16.3113	17	20	15	1	1876	198.725	5.34	41.7035	17
FALSE	High	Master Protein	A0A0H3M5M8	Probable oxidoreductase OS=Mycobacterium bovis (strain BCG / Pasteur 1173P2) GN=BCG_1807 PE=4 SV=1	0	56.6082	33.4081	10	11	10	1	446	48.31	5.54	31.337	10
FALSE	High	Master Protein	A1KMN3	Elongation factor Ts OS=Mycobacterium bovis (strain BCG / Pasteur 1173P2) GN=tsf PE=3 SV=1	0	56.5358	58.6716	11	17	11	1	271	28.767	5.39	36.0988	11
FALSE	High	Master Protein	A0A0K2HWS8	Isocitrate lyase AceAb OS=Mycobacterium bovis BCG GN=RN06_2371 PE=4 SV=1	0	56.1492	30.8094	16	20	16	1	766	85.266	6.19	39.2429	16
FALSE	High	Master Protein	A0A083WMM7	Acyl dehydratase OS=Mycobacterium bovis GN=BOVR_01140 PE=4 SV=1	0	54.8142	59.9407	14	24	14	1	337	35.766	6.99	45.3224	14
FALSE	High	Master Protein	A0A0H3M0V2	Probable conserved MCE associated membrane protein OS=Mycobacterium bovis (strain BCG / Pasteur 1173P2) GN=BCG_0215 PE=4 SV=1	0	54.5881	53.6885	8	10	8	1	244	25.896	5.78	32.7049	8
FALSE	High	Master Protein	A0A0C7DIH3	Oxidoreductase, short-chain dehydrogenase/reducta se family OS=Mycobacterium bovis GN=MBO1_03597 PE=4 SV=1	0	54.3373	80.2048	13	18	13	1	293	30.561	5.47	28.1343	13
FALSE	High	Master Protein	A0A0H3M2X4	Probable molybdopterin biosynthesis protein moeA1 OS=Mycobacterium bovis (strain BCG / Pasteur 1173P2) GN=moeA1 PE=4 SV=1	0	54.0598	34.9765	10	12	10	1	426	44.263	6.57	34.4121	10
FALSE	High	Master Protein	A1KKZ1	Chaperone protein HtpG OS=Mycobacterium bovis (strain BCG / Pasteur 1173P2) GN=htpG PE=3 SV=1	0	53.0708	33.694	13	19	13	1	647	72.916	4.88	47.5405	13
FALSE	High	Master Protein	A0A083WJC8	Acetyl-CoA acetyltransferase OS=Mycobacterium bovis GN=BOVR_01285 PE=3 SV=1	0	52.6623	34.0909	10	14	10	1	440	46.079	6.67	38.4012	10
FALSE	High	Master Protein	A0A0C7DGI3	DNA-binding protein HU homolog (21 kDa laminin-2-binding protein) (28 kDa iron-regulated protein) (Irep-28) (Histone-like protein) (Hlp) OS=Mycobacterium bovis GN=MBO1_02755 PE=3 SV=1	0	52.401	30.8411	7	15	7	1	214	22.174	11.94	36.8162	7
FALSE	High	Master Protein	A0A0C7DD57	Methyltransferase/methylase OS=Mycobacterium bovis GN=MBO1_01281 PE=4 SV=1	0	52.3296	48.5507	10	14	10	1	276	29.799	10.45	35.5172	10
FALSE	High	Master Protein	A0A083VXA8	3-isopropylmalate dehydratase large subunit OS=Mycobacterium bovis GN=leuC PE=3 SV=1	0	51.9493	39.3235	12	19	12	1	473	50.167	5.59	28.3204	12
FALSE	High	Master Protein	A0A0H3M5V0	Acetyl/propionyl-CoA carboxylase (Beta subunit) accD6 OS=Mycobacterium bovis (strain BCG / Pasteur 1173P2) GN=accD6 PE=4 SV=1	0	51.5024	42.9175	15	17	15	1	473	50.105	6.15	31.0788	15
FALSE	High	Master Protein	A0A0H3P6S3	Esx conserved component ecca1. esx-1 type vii secretion system protein OS=Mycobacterium bovis (strain ATCC BAA-935 / AF2122/97) GN=ecca1 PE=4 SV=1	0	51.2046	36.3002	14	19	14	1	573	62.415	5.19	29.8066	14
FALSE	High	Master Protein	A0A109S6S2	Oxidoreductase OS=Mycobacterium bovis BCG GN=RN06_1154 PE=4 SV=1	0	51.1776	51.3423	10	13	10	1	298	30.587	6.64	33.5313	10
FALSE	High	Master Protein	A0A0H3M3L4	Dihydrolipoyl dehydrogenase OS=Mycobacterium bovis (strain BCG / Pasteur 1173P2) GN=lpd PE=4 SV=1	0	51.0122	34.2672	11	13	11	1	464	49.208	5.86	33.8493	11
FALSE	High	Master Protein	A0A083W507	Ferredoxin reductase (Probable reductase) OS=Mycobacterium bovis GN=MBO1_03829 PE=4 SV=1	0	50.6917	38.1995	12	16	12	1	411	43.602	5.14	35.9109	12
FALSE	High	Master Protein	A0A0H3M499	Probable polyketide beta-ketoacyl synthase pks3 OS=Mycobacterium bovis (strain BCG / Pasteur 1173P2) GN=pks3 PE=4 SV=1	0	50.5264	15.8753	16	20	15	1	2085	220.307	5.59	30.2938	16
FALSE	High	Master Protein	A0A0M4NBY8	Aconitate hydratase OS=Mycobacterium bovis GN=acnA PE=4 SV=1	0	50.475	27.8775	15	18	15	1	947	102.756	5.08	31.0714	15
FALSE	High	Master Protein	Q7TXK8	Phenolphthiocerol synthesis polyketide synthase type I Pks15/1 OS=Mycobacterium bovis (strain ATCC BAA-935 / AF2122/97) GN=pks15/1 PE=1 SV=1	0	50.3126	14.8201	16	18	16	1	2112	218.168	4.98	35.8481	16
FALSE	High	Master Protein	A0A0C7DKW7	Peptidyl-prolyl cis-trans isomerase OS=Mycobacterium bovis GN=MBO1_03281 PE=3 SV=1	0	50.1472	59.2593	10	16	10	1	189	19.896	6.52	40.0045	10
FALSE	High	Master Protein	A0A0H4YAI8	Catalase-peroxidase OS=Mycobacterium bovis GN=katG PE=3 SV=1	0	49.2	27.027	12	15	12	1	740	80.511	5.21	24.882	12
FALSE	High	Master Protein	P0A5P1	Cyclopropane mycolic acid synthase 2 OS=Mycobacterium bovis (strain ATCC BAA-935 / AF2122/97) GN=cmaA2 PE=3 SV=1	0	49.076	53.9735	9	16	9	1	302	34.638	5.29	28.9245	9
FALSE	High	Master Protein	A0A0H3M8Z8	Probable glutamine-transport ATP-binding protein ABC transporter glnQ OS=Mycobacterium bovis (strain BCG / Pasteur 1173P2) GN=glnQ PE=4 SV=1	0	49.0757	41.2121	11	15	11	1	330	35.407	5.58	35.4303	11
FALSE	High	Master Protein	A0A0H3M7N1	Probable fatty-acid-CoA ligase fadD2 OS=Mycobacterium bovis (strain BCG / Pasteur 1173P2) GN=fadD2 PE=4 SV=1	0	48.7025	41.7857	14	16	14	1	560	59.87	6.77	36.0291	14
FALSE	High	Master Protein	A1KFU9	Heparin-binding hemagglutinin OS=Mycobacterium bovis (strain BCG / Pasteur 1173P2) GN=hbhA PE=1 SV=1	0	48.563	39.6985	9	13	9	1	199	21.522	9.19	28.1827	9
FALSE	High	Master Protein	A0A083WHM1	3-hydroxyacyl-CoA dehydrogenase OS=Mycobacterium bovis GN=BOVR_04550 PE=4 SV=1	0	48.2295	23.0556	12	16	12	1	720	76.086	5.57	34.9294	12
FALSE	High	Master Protein	A0A0D1Q5I8	35 kDa protein OS=Mycobacterium bovis GN=BOVR_14180 PE=4 SV=1	0	48.0574	42.5926	9	12	9	1	270	29.24	5.96	36.0263	9
FALSE	High	Master Protein	A0A0H3P8J8	PROBABLE MACROLIDE-TRANSPORT ATP-BINDING PROTEIN ABC TRANSPORTER OS=Mycobacterium bovis (strain ATCC BAA-935 / AF2122/97) GN=Mb2504c PE=4 SV=1	0	48.0237	35.1254	13	16	13	1	558	61.855	5.31	35.7506	13
FALSE	High	Master Protein	A0A109S7X8	Oxidoreductase FadB OS=Mycobacterium bovis BCG GN=RN06_2368 PE=4 SV=1	0	47.6525	33.4852	12	16	12	1	439	47.05	8.25	29.3053	12
FALSE	High	Master Protein	A1KEU8	Maltokinase OS=Mycobacterium bovis (strain BCG / Pasteur 1173P2) GN=mak PE=3 SV=1	0	47.582	42.4176	12	18	12	1	455	49.858	5.2	43.4401	12
FALSE	High	Master Protein	A0A0H3P8G3	Phospho-2-dehydro-3-deoxyheptonate aldolase OS=Mycobacterium bovis (strain ATCC BAA-935 / AF2122/97) GN=aroG PE=3 SV=1	0	47.3367	37.6623	9	12	9	1	462	50.624	5.76	31.3824	9
FALSE	High	Master Protein	A0A083W359	Acyl carrier protein OS=Mycobacterium bovis GN=acpP PE=3 SV=1	0	47.0671	35.6522	5	7	5	1	115	12.516	4.09	26.6665	5
FALSE	High	Master Protein	A0A0H3M5J1	Probable serine protease htrA OS=Mycobacterium bovis (strain BCG / Pasteur 1173P2) GN=htrA PE=4 SV=1	0	47.0259	33.7121	11	14	11	1	528	54.15	5.16	39.8312	11
FALSE	High	Master Protein	A0A0H3MAH2	NADH-quinone oxidoreductase OS=Mycobacterium bovis (strain BCG / Pasteur 1173P2) GN=nuoG PE=3 SV=1	0	46.3459	36.8486	16	19	16	1	806	85.359	5.59	35.3023	16
FALSE	High	Master Protein	P59953	Serine hydroxymethyltransferase 1 OS=Mycobacterium bovis (strain ATCC BAA-935 / AF2122/97) GN=glyA1 PE=3 SV=2	0	46.2805	50.2283	13	17	13	1	438	46.159	6.6	28.9422	13
FALSE	High	Master Protein	A0A0K2HTE8	Enoyl-CoA hydratase EchA6 OS=Mycobacterium bovis BCG GN=RN06_1127 PE=3 SV=1	0	45.971	72.8395	12	14	12	1	243	26.012	6.4	31.9557	12
FALSE	High	Master Protein	A0A0C7DSS2	Protein translocase subunit SecA OS=Mycobacterium bovis GN=secA PE=3 SV=1	0	45.8338	26.7327	12	17	12	1	808	88.897	5.45	36.3439	12
FALSE	High	Master Protein	A1KKQ5	Probable cytosol aminopeptidase OS=Mycobacterium bovis (strain BCG / Pasteur 1173P2) GN=pepA PE=3 SV=1	0	45.4939	29.5146	10	11	10	1	515	53.414	8.06	31.8856	10
FALSE	High	Master Protein	A0A083VWF9	Uncharacterized protein OS=Mycobacterium bovis GN=BOVR_17060 PE=4 SV=1	0	45.4472	50.8434	13	19	13	1	415	45.304	5.64	35.8399	13
FALSE	High	Master Protein	A0A0C7DDJ0	Haloalkane dehalogenase OS=Mycobacterium bovis GN=dhmA PE=3 SV=1	0	45.2883	55.0633	12	14	12	1	316	35.159	6.71	28.6065	12
FALSE	High	Master Protein	A0A0H3P1M6	PROBABLE SUCCINATE DEHYDROGENASE [IRON-SULFUR SUBUNIT] (SUCCINIC DEHYDROGENASE) OS=Mycobacterium bovis (strain ATCC BAA-935 / AF2122/97) GN=Mb0253c PE=4 SV=1	0	44.7988	34.6774	9	14	9	1	248	28.607	6.25	28.1394	9
FALSE	High	Master Protein	A0A0H3P429	Conserved protein OS=Mycobacterium bovis (strain ATCC BAA-935 / AF2122/97) GN=Mb2080 PE=4 SV=1	0	44.6628	44.3038	11	14	11	1	237	25.167	9.41	27.194	11
FALSE	High	Master Protein	A0A109SB20	DNA topoisomerase 1 OS=Mycobacterium bovis BCG GN=topA PE=3 SV=1	0	44.5402	23.1508	14	17	14	1	1041	114.264	9.14	31.1073	14
FALSE	High	Master Protein	A0A0C7DI38	Acyl-CoA synthetase OS=Mycobacterium bovis GN=BOVR_15210 PE=4 SV=1	0	44.5265	23.9655	10	13	8	1	580	62.63	5.5	31.0947	10
FALSE	High	Master Protein	Q6SA89	Putative transcriptional regulator CRP OS=Mycobacterium bovis BCG GN=RN06_4483 PE=4 SV=1	0	44.512	53.5714	10	11	10	1	224	24.759	9.95	23.5002	10
FALSE	High	Master Protein	A0A0H3MA00	Probable oligopeptide-transport ATP-binding protein ABC transporter oppD OS=Mycobacterium bovis (strain BCG / Pasteur 1173P2) GN=oppD PE=3 SV=1	0	44.3691	28.4314	10	12	10	1	612	65.253	6.44	34.0429	10
FALSE	High	Master Protein	A0A0H3MGW8	Probable electron transfer flavoprotein (Alpha-subunit) fixB OS=Mycobacterium bovis (strain BCG / Pasteur 1173P2) GN=fixB PE=4 SV=1	0	44.2302	66.0377	10	15	10	1	318	31.7	4.79	36.6057	10
FALSE	High	Master Protein	A1KI95	ATP synthase subunit b-delta OS=Mycobacterium bovis (strain BCG / Pasteur 1173P2) GN=atpFH PE=3 SV=1	0	43.938	37.4439	12	16	12	1	446	48.776	5.58	29.2293	12
FALSE	High	Master Protein	A0A0M3TQ54	S-adenosylmethionine synthase OS=Mycobacterium bovis GN=metK PE=3 SV=1	0	43.7936	46.1538	9	11	9	1	403	42.992	5.07	22.314	9
FALSE	High	Master Protein	A0A0H3M4V4	Possible magnesium chelatase OS=Mycobacterium bovis (strain BCG / Pasteur 1173P2) GN=BCG_1012 PE=4 SV=1	0	43.6242	37.6906	11	13	11	1	459	49.561	5.38	34.9578	11
FALSE	High	Master Protein	A0A0H3M7F0	MCE-family protein mce1F OS=Mycobacterium bovis (strain BCG / Pasteur 1173P2) GN=mce1F PE=4 SV=1	0	43.5583	31.068	9	13	9	1	515	53.988	5.86	36.3785	9
FALSE	High	Master Protein	A0A120IPR7	Polyribonucleotide nucleotidyltransferase OS=Mycobacterium bovis BCG GN=pnp PE=3 SV=1	0	43.5501	29.4903	14	15	14	1	824	87.349	5.11	31.3451	14
FALSE	High	Master Protein	P65070	Uncharacterized protein Mb3433 OS=Mycobacterium bovis (strain ATCC BAA-935 / AF2122/97) GN=Mb3433 PE=4 SV=1	0	43.3827	61.4504	9	13	9	1	262	28.21	5.92	27.9302	9
FALSE	High	Master Protein	C1AHL0	GMP synthase [glutamine-hydrolyzing] OS=Mycobacterium bovis (strain BCG / Tokyo 172 / ATCC 35737 / TMC 1019) GN=guaA PE=3 SV=1	0	42.9814	36.7619	11	12	11	1	525	56.025	5.54	33.6899	11
FALSE	High	Master Protein	A0A0H3M977	Succinate dehydrogenase flavoprotein subunit OS=Mycobacterium bovis (strain BCG / Pasteur 1173P2) GN=sdhA PE=3 SV=1	0	42.9537	33.2203	14	15	14	1	590	64.785	6.06	37.97	14
FALSE	High	Master Protein	P0A5M3	Transcription termination/antitermination protein NusA OS=Mycobacterium bovis (strain ATCC BAA-935 / AF2122/97) GN=nusA PE=3 SV=1	0	42.6821	44.3804	10	12	10	1	347	37.619	6.9	33.718	10
FALSE	High	Master Protein	A0A0C7DM37	Phosphoglycerate mutase family protein OS=Mycobacterium bovis GN=MBO1_03057 PE=4 SV=1	0	42.3352	45.614	6	9	6	1	228	24.574	6.68	25.5975	6
FALSE	High	Master Protein	A0A0C7DJ27	Uncharacterized PPE family protein PPE30 OS=Mycobacterium bovis GN=BOVR_09365 PE=4 SV=1	0	42.2138	28.5097	6	13	6	1	463	45.992	5.64	37.2268	6
FALSE	High	Master Protein	A0A0C7DN15	Uncharacterized protein OS=Mycobacterium bovis GN=MBO1_02739 PE=4 SV=1	0	41.6191	51.341	8	12	8	1	261	27.53	6.01	22.8532	8
FALSE	High	Master Protein	A0A0H3M2N0	Probable nad(P) transhydrogenase (Subunit alpha) pntAa [first part] OS=Mycobacterium bovis (strain BCG / Pasteur 1173P2) GN=pntAa PE=4 SV=1	0	41.4018	31.1475	8	13	8	1	366	37.671	5.02	30.0829	8
FALSE	High	Master Protein	A0A0H3M2Z6	Possible two component system response transcriptional positive regulator phoP OS=Mycobacterium bovis (strain BCG / Pasteur 1173P2) GN=phoP PE=4 SV=1	0	40.9431	65.9919	12	13	12	1	247	27.497	6.4	31.0081	12
FALSE	High	Master Protein	A0A083WAT1	Acetoin dehydrogenase OS=Mycobacterium bovis GN=BOVR_06615 PE=3 SV=1	0	40.734	46.7391	9	13	9	1	276	29.197	7.71	23.0037	9
FALSE	High	Master Protein	A0A0H3M380	Chaperone protein DnaJ OS=Mycobacterium bovis (strain BCG / Pasteur 1173P2) GN=dnaJ1 PE=3 SV=1	0	40.7178	46.5823	11	13	11	1	395	41.29	8.12	27.8349	11
FALSE	High	Master Protein	A0A0H3M4A9	Uncharacterized protein OS=Mycobacterium bovis (strain BCG / Pasteur 1173P2) GN=BCG_0780 PE=4 SV=1	0	40.5494	66.5289	13	13	13	1	242	25.964	5.39	24.0764	13
FALSE	High	Master Protein	A0A0H3MAD8	Aspartate-semialdehyde dehydrogenase OS=Mycobacterium bovis (strain BCG / Pasteur 1173P2) GN=asd PE=3 SV=1	0	40.4602	44.058	8	10	8	1	345	36.208	5.03	30.3429	8
FALSE	High	Master Protein	A0A0C7DR03	Putative oxidoreductase OS=Mycobacterium bovis GN=MBO1_00379 PE=3 SV=1	0	40.4404	56.1194	10	13	10	1	335	36.201	8.15	31.1491	10
FALSE	High	Master Protein	A0A0K2HYK3	Short-chain type dehydrogenase/reductase OS=Mycobacterium bovis BCG GN=RN06_3068 PE=4 SV=1	0	40.1961	51.4925	11	14	11	1	268	27.996	8.66	34.6279	11
FALSE	High	Master Protein	A0A0K2HRC0	Mce associated membrane protein OS=Mycobacterium bovis BCG GN=RN06_0221 PE=4 SV=1	0	40.1636	52.766	8	9	8	1	235	24.441	4.86	24.5007	8
FALSE	High	Master Protein	A0A120IR57	Peptidoglycan biosynthesis protein OS=Mycobacterium bovis BCG GN=RN06_4766 PE=4 SV=1	0	40.1551	16.6385	10	15	10	1	1184	123.459	7.42	35.9464	10
FALSE	High	Master Protein	A0A083W9M0	Bifunctional diaminohydroxyphosphoribosylaminopyrimidine deaminase/5-amino-6-(5-phosphoribosylamino)uracil reductase OS=Mycobacterium bovis GN=BOVR_07480 PE=4 SV=1	0	40.1274	43.9528	8	10	8	1	339	35.361	6.65	28.5521	8
FALSE	High	Master Protein	Q7U1K2	UPF0336 protein Mb0656 OS=Mycobacterium bovis (strain ATCC BAA-935 / AF2122/97) GN=Mb0656 PE=3 SV=1	0	40.0615	55.4217	8	13	8	1	166	18.917	5.4	29.3939	8
FALSE	High	Master Protein	A0A0H3P365	PROBABLE QUINONE REDUCTASE QOR (NADPH:quinone reductase) (Zeta-crystallin homolog protein) OS=Mycobacterium bovis (strain ATCC BAA-935 / AF2122/97) GN=qor PE=4 SV=1	0	40.0208	48.4756	10	11	10	1	328	34.026	5.62	28.0329	10
FALSE	High	Master Protein	A0A0K2HXP6	Glycerolphosphodiesterase OS=Mycobacterium bovis BCG GN=RN06_2794 PE=4 SV=1	0	39.9746	44.0789	9	13	9	1	304	32.356	5.44	23.5913	9
FALSE	High	Master Protein	A0A0K2HXK9	Adenosine kinase OS=Mycobacterium bovis BCG GN=RN06_2703 PE=4 SV=1	0	39.8711	43.8272	7	10	7	1	324	34.45	4.89	29.8828	7
FALSE	High	Master Protein	A0A0H4XR45	Amidohydrolase OS=Mycobacterium bovis GN=BOVR_02175 PE=4 SV=1	0	39.6966	33.6	9	11	9	1	500	52.01	5.19	25.1546	9
FALSE	High	Master Protein	A0A109S7K8	Uncharacterized protein OS=Mycobacterium bovis BCG GN=RN06_2070 PE=4 SV=1	0	39.6661	42.093	8	11	6	1	430	46.112	5.91	23.7458	8
FALSE	High	Master Protein	A0A0H3M4Y2	Probable 3-oxoacyl-[acyl-carrier protein] reductase fabG1 OS=Mycobacterium bovis (strain BCG / Pasteur 1173P2) GN=fabG1 PE=4 SV=1	0	39.6296	38.8664	7	13	7	1	247	25.681	8.7	31.9695	7
FALSE	High	Master Protein	P66538	30S ribosomal protein S2 OS=Mycobacterium bovis (strain ATCC BAA-935 / AF2122/97) GN=rpsB PE=3 SV=1	0	39.4611	29.6167	8	12	8	1	287	31.07	6.43	27.9834	8
FALSE	High	Master Protein	A0A0H3P7K2	PROBABLE ISOCHORISMATE SYNTHASE ENTC (ISOCHORISMATE HYDROXYMUTASE) (ENTEROCHELIN BIOSYNTHESIS) OS=Mycobacterium bovis (strain ATCC BAA-935 / AF2122/97) GN=entC PE=4 SV=1	0	39.373	37.9032	8	13	8	1	372	38.913	7.47	28.761	8
FALSE	High	Master Protein	A0A083VVT8	3-phosphoshikimate 1-carboxyvinyltransferase OS=Mycobacterium bovis GN=aroA PE=3 SV=1	0	38.9328	34.8889	10	12	10	1	450	46.378	8.56	27.1995	10
FALSE	High	Master Protein	P64246	Probable glutamine synthetase 2 OS=Mycobacterium bovis (strain ATCC BAA-935 / AF2122/97) GN=glnA2 PE=3 SV=1	0	38.5692	28.2511	6	10	6	1	446	49.576	5.49	29.2656	6
FALSE	High	Master Protein	A0A083VRX6	Superoxide dismutase OS=Mycobacterium bovis GN=BOVR_20040 PE=3 SV=1	0	38.4872	37.6812	6	9	6	1	207	23.008	6.44	24.1269	6
FALSE	High	Master Protein	A0A0H3M3E8	Citrate synthase OS=Mycobacterium bovis (strain BCG / Pasteur 1173P2) GN=gltA2 PE=3 SV=1	0	38.4001	32.7146	9	11	9	1	431	47.918	5.62	25.3513	9
FALSE	High	Master Protein	A0A0C7DDP5	Uncharacterized protein OS=Mycobacterium bovis GN=MBO1_01550 PE=4 SV=1	0	37.9174	42.0245	8	12	8	1	326	35.602	6.33	28.7857	8
FALSE	High	Master Protein	A0A0C7DQ69	50S ribosomal protein L4 OS=Mycobacterium bovis GN=rplD PE=3 SV=1	0	37.7449	39.7321	6	9	6	1	224	23.86	10.13	21.3867	6
FALSE	High	Master Protein	A0A0K2I1G4	30S ribosomal protein S4 OS=Mycobacterium bovis BCG GN=rpsD PE=3 SV=1	0	37.7185	67.6617	12	15	12	1	201	23.461	10.02	32.9313	12
FALSE	High	Master Protein	A0A0H3MB17	Possible zinc-containing alcohol dehydrogenase NAD dependant adhB OS=Mycobacterium bovis (strain BCG / Pasteur 1173P2) GN=adhB PE=3 SV=1	0	37.5409	41.3333	8	11	8	1	375	39.722	5.31	23.6101	8
FALSE	High	Master Protein	A0A0H3P3M2	Ppe family protein ppe26 OS=Mycobacterium bovis (strain ATCC BAA-935 / AF2122/97) GN=PPE26 PE=4 SV=1	0	37.4645	17.8117	3	14	3	1	393	38.548	4.53	36.4621	3
FALSE	High	Master Protein	A0A0H3M6Y1	Probable dehydrogenase OS=Mycobacterium bovis (strain BCG / Pasteur 1173P2) GN=BCG_1846c PE=4 SV=1	0	37.2662	41.5	10	10	10	1	400	41.914	7.2	21.1126	10
FALSE	High	Master Protein	P59989	Putative thiosulfate sulfurtransferase 1 OS=Mycobacterium bovis (strain ATCC BAA-935 / AF2122/97) GN=cysA1 PE=3 SV=1	0	37.2276	66.426	9	12	9	1	277	30.996	5.33	25.3865	9
FALSE	High	Master Protein	A0A0H3P4I9	Conserved protein OS=Mycobacterium bovis (strain ATCC BAA-935 / AF2122/97) GN=Mb2433c PE=4 SV=1	0	37.1151	39.0769	7	9	7	1	325	35.998	5.44	23.2426	7
FALSE	High	Master Protein	A0A0H3M655	Uncharacterized protein OS=Mycobacterium bovis (strain BCG / Pasteur 1173P2) GN=BCG_1542 PE=4 SV=1	0	37.0894	47.3186	10	13	10	1	317	34.312	8.02	22.8089	10
FALSE	High	Master Protein	A0A0K2HS29	Isocitrate lyase OS=Mycobacterium bovis BCG GN=RN06_0577 PE=4 SV=1	0	36.8515	33.1776	7	12	7	1	428	47.057	5.15	30.093	7
FALSE	High	Master Protein	A0A0Y1BII3	Lysophospholipase OS=Mycobacterium bovis BCG GN=RN06_0230 PE=4 SV=1	0	36.7791	47.3154	10	14	10	1	298	32.211	6.38	28.195	10
FALSE	High	Master Protein	C1AKX4	50S ribosomal protein L1 OS=Mycobacterium bovis (strain BCG / Tokyo 172 / ATCC 35737 / TMC 1019) GN=rplA PE=3 SV=1	0	36.4636	43.8298	6	6	6	1	235	24.711	9.74	22.7269	6
FALSE	High	Master Protein	A0A083WMT4	Serine/threonine-protein kinase PknA OS=Mycobacterium bovis GN=MBO_300560 PE=4 SV=1	0	36.2224	22.9698	8	12	8	1	431	45.569	10.64	22.4016	8
FALSE	High	Master Protein	A0A0H3P690	Conserved protein OS=Mycobacterium bovis (strain ATCC BAA-935 / AF2122/97) GN=Mb1761c PE=4 SV=1	0	36.0796	51.0989	6	9	6	1	182	19.387	5.29	23.5143	6
FALSE	High	Master Protein	A0A0H3MAG0	Probable fatty-acid-CoA ligase fadD25 OS=Mycobacterium bovis (strain BCG / Pasteur 1173P2) GN=fadD25 PE=4 SV=1	0	35.9826	25.3859	9	12	8	1	583	63.129	5.38	17.3766	9
FALSE	High	Master Protein	A0A0K2I0U0	Propionyl-CoA carboxylase subunit beta OS=Mycobacterium bovis BCG GN=RN06_3966 PE=4 SV=1	0	35.8115	29.2639	11	12	11	1	557	60.301	5.43	26.8623	11
FALSE	High	Master Protein	A0A0H3P4A2	PROBABLE FATTY ACID SYNTHASE FAS (FATTY ACID SYNTHETASE) OS=Mycobacterium bovis (strain ATCC BAA-935 / AF2122/97) GN=fas PE=4 SV=1	0	35.748	8.92799	15	15	15	1	3069	326.106	5.17	28.886	15
FALSE	High	Master Protein	A1KMW6	Uncharacterized oxidoreductase BCG_2993 OS=Mycobacterium bovis (strain BCG / Pasteur 1173P2) GN=BCG_2993 PE=3 SV=1	0	35.744	42.5532	8	13	8	1	282	30.368	4.88	34.9538	8
FALSE	High	Master Protein	A0A083WMQ5	Acyl-CoA dehydrogenase (Probable acyl-CoA dehydro genase FadE5) OS=Mycobacterium bovis GN=MBO_303490 PE=3 SV=1	0	35.7013	28.9689	10	10	10	1	611	65.975	5.58	26.0928	10
FALSE	High	Master Protein	A0A0C7DKX7	FHA domain-containing protein FhaA OS=Mycobacterium bovis GN=BOVR_00115 PE=4 SV=1	0	35.6839	44.3378	12	13	12	1	521	55.969	5.03	27.8084	12
FALSE	High	Master Protein	A0A0C7DGC6	Thioesterase OS=Mycobacterium bovis GN=MBO1_02691 PE=4 SV=1	0	35.6383	42.5856	8	15	8	1	263	29.351	5.36	27.3841	8
FALSE	High	Master Protein	Q7U0Z0	Succinyl-CoA ligase [ADP-forming] subunit alpha OS=Mycobacterium bovis (strain ATCC BAA-935 / AF2122/97) GN=sucD PE=3 SV=1	0	35.4732	48.8449	8	10	8	1	303	31.181	5.85	24.4468	8
FALSE	High	Master Protein	A0A109SBJ2	ESX-1 secretion-associated protein EspL OS=Mycobacterium bovis BCG GN=RN06_4723 PE=3 SV=1	0	35.2707	62.6087	3	10	3	1	115	12.192	4.84	21.7887	3
FALSE	High	Master Protein	A0A083VX57	Doxorubicin resistance ATP-binding protein DrrA OS=Mycobacterium bovis GN=BOVR_15185 PE=4 SV=1	0	35.2185	55.8912	12	13	12	1	331	35.774	6.57	25.8343	12
FALSE	High	Master Protein	A0A0H3M8W5	Probable acyl-[acyl-carrier protein] desaturase desA1 OS=Mycobacterium bovis (strain BCG / Pasteur 1173P2) GN=desA1 PE=4 SV=1	0	34.7142	29.8817	7	9	7	1	338	38.746	6.7	19.4524	7
FALSE	High	Master Protein	A0A083WGK9	Phosphoserine aminotransferase OS=Mycobacterium bovis GN=serC PE=3 SV=1	0	34.6292	24.2021	4	9	4	1	376	40.209	4.94	18.156	4
FALSE	High	Master Protein	A0A0C7DCP8	50S ribosomal protein L3 OS=Mycobacterium bovis GN=rplC PE=3 SV=1	0	34.4826	41.1765	5	8	5	1	221	23.549	10.3	20.9916	5
FALSE	High	Master Protein	A0A083WCI6	Acyl-CoA synthetase OS=Mycobacterium bovis GN=BOVR_06350 PE=4 SV=1	0	34.4354	32.5581	8	11	8	1	473	49.49	6.38	23.473	8
FALSE	High	Master Protein	A1KPC8	Phosphoglucosamine mutase OS=Mycobacterium bovis (strain BCG / Pasteur 1173P2) GN=glmM PE=3 SV=1	0	34.0398	17.1875	5	7	5	1	448	45.845	5.43	22.3107	5
FALSE	High	Master Protein	A0A0H3M2E5	Single-stranded DNA-binding protein OS=Mycobacterium bovis (strain BCG / Pasteur 1173P2) GN=ssb PE=3 SV=1	0	34.0103	67.0732	5	12	5	1	164	17.343	5.21	29.7208	5
FALSE	High	Master Protein	C1AKK4	Glutamate-1-semialdehyde 2,1-aminomutase OS=Mycobacterium bovis (strain BCG / Tokyo 172 / ATCC 35737 / TMC 1019) GN=hemL PE=3 SV=1	0	33.9324	32.684	7	9	7	1	462	47.486	6.35	21.74	7
FALSE	High	Master Protein	A0A0H3M1F9	Aldehyde dehydrogenase OS=Mycobacterium bovis (strain BCG / Pasteur 1173P2) GN=BCG_0183 PE=3 SV=1	0	33.8977	26.2846	6	9	6	1	506	55.001	9.17	23.4503	6
FALSE	High	Master Protein	A1KGK0	50S ribosomal protein L6 OS=Mycobacterium bovis (strain BCG / Pasteur 1173P2) GN=rplF PE=3 SV=1	0	33.8544	40.2235	5	8	5	1	179	19.366	10.21	22.7863	5
FALSE	High	Master Protein	A0A120IQS1	Fatty acid synthase OS=Mycobacterium bovis BCG GN=RN06_4536 PE=4 SV=1	0	33.847	40.0468	9	12	9	1	427	47.57	6.8	26.2866	9
FALSE	High	Master Protein	A0A0C7DQ43	Uncharacterized protein Rv0647c/MT0675 OS=Mycobacterium bovis GN=MBO1_00477 PE=4 SV=1	0	33.8449	24.7951	9	9	9	1	488	54.82	7.52	21.7976	9
FALSE	High	Master Protein	A0A0C7DTD0	Pyridoxal 5'-phosphate synthase subunit PdxS OS=Mycobacterium bovis GN=pdxS PE=3 SV=1	0	33.8365	33.9869	8	10	8	1	306	32.005	5.53	25.384	8
FALSE	High	Master Protein	A0A0M3TN82	Uncharacterized protein OS=Mycobacterium bovis GN=BOVR_01020 PE=4 SV=1	0	33.6697	28.6932	6	10	6	1	352	36.544	5.6	23.9749	6
FALSE	High	Master Protein	A0A0G2Q9E8	Probable chromosome partitioning protein parB OS=Mycobacterium bovis (strain BCG / Pasteur 1173P2) GN=parB_2 PE=3 SV=1	0	33.6593	41.2791	8	10	8	1	344	36.996	7.28	22.1545	8
FALSE	High	Master Protein	A0A0Y1C3I9	1,4-dihydroxy-2-naphthoyl-CoA synthase OS=Mycobacterium bovis BCG GN=menB PE=3 SV=1	0	33.3385	34.5029	7	10	7	1	342	37.725	8.27	25.633	7
FALSE	High	Master Protein	C1AMY5	Ribonuclease PH OS=Mycobacterium bovis (strain BCG / Tokyo 172 / ATCC 35737 / TMC 1019) GN=rph PE=3 SV=1	0	33.1694	53.668	8	9	8	1	259	27.334	5.52	20.7405	8
FALSE	High	Master Protein	A0A0C7DFV5	Putative cell division ATP-binding protein OS=Mycobacterium bovis GN=MBO1_02634 PE=4 SV=1	0	33.1421	61.3043	10	12	10	1	230	25.712	9.26	27.1984	10
FALSE	High	Master Protein	A0A083WIJ7	Geranylgeranyl pyrophosphate synthase OS=Mycobacterium bovis GN=BOVR_02935 PE=3 SV=1	0	33.0381	40.8955	7	10	7	1	335	35.538	5.12	25.3864	7
FALSE	High	Master Protein	A0A0H3P5Q7	POSSIBLE SOJ/PARA-RELATED PROTEIN OS=Mycobacterium bovis (strain ATCC BAA-935 / AF2122/97) GN=Mb3239c PE=4 SV=1	0	33.036	28.9474	6	8	6	1	266	28.558	7.42	18.2767	6
FALSE	High	Master Protein	A0A0H3MFS5	Putative cytoplasmic peptidase pepQ OS=Mycobacterium bovis (strain BCG / Pasteur 1173P2) GN=pepQ PE=4 SV=1	0	32.8747	30.914	7	8	7	1	372	38.767	5.45	20.0457	7
FALSE	High	Master Protein	A0A0C7DS58	Methylmalonate-semialdehyde dehydrogenase OS=Mycobacterium bovis GN=BOVR_03970 PE=3 SV=1	0	32.7356	35.098	10	13	10	1	510	54.42	5.71	18.7293	10
FALSE	High	Master Protein	A0A0H4XXV7	Acyl-CoA synthetase OS=Mycobacterium bovis GN=BOVR_15255 PE=4 SV=1	0	32.5783	21.4863	9	12	9	1	619	67.434	6.43	28.4193	9
FALSE	High	Master Protein	A0A0H3P631	CONSERVED HYPOTHETICAL MCE ASSOCIATED ALANINE AND VALINE RICH PROTEIN OS=Mycobacterium bovis (strain ATCC BAA-935 / AF2122/97) GN=Mb3523c PE=4 SV=1	0	32.5279	50.8264	7	11	7	1	242	25.595	10.11	23.514	7
FALSE	High	Master Protein	A0A0K2I0I4	Signal recognition particle protein OS=Mycobacterium bovis BCG GN=ffh PE=3 SV=1	0	32.3738	30.2857	8	10	8	1	525	54.967	8.06	26.7161	8
FALSE	High	Master Protein	A0A0H3MFH1	Uncharacterized protein OS=Mycobacterium bovis (strain BCG / Pasteur 1173P2) GN=BCG_2427c PE=4 SV=1	0	32.2649	27.5862	8	8	8	1	551	61.345	5.81	24.9603	8
FALSE	High	Master Protein	C1AN82	Phosphoglycerate kinase OS=Mycobacterium bovis (strain BCG / Tokyo 172 / ATCC 35737 / TMC 1019) GN=pgk PE=3 SV=1	0	32.249	32.767	7	8	7	1	412	42.486	5	17.7372	7
FALSE	High	Master Protein	A0A0H3M796	Uncharacterized protein OS=Mycobacterium bovis (strain BCG / Pasteur 1173P2) GN=BCG_0121 PE=4 SV=1	0	32.2023	35.2679	6	7	6	1	224	24.634	10.61	17.7723	6
FALSE	High	Master Protein	A0A0K2I296	Lyase OS=Mycobacterium bovis BCG GN=RN06_4492 PE=4 SV=1	0	32.153	27.4457	8	9	8	1	368	39.932	6.54	22.6559	8
FALSE	High	Master Protein	A0A0H3M245	Possible ribonucleotide-transport ATP-binding protein ABC transporter mkl OS=Mycobacterium bovis (strain BCG / Pasteur 1173P2) GN=mkl PE=4 SV=1	0	32.0066	30.3621	8	8	8	1	359	39.369	6	15.5988	8
FALSE	High	Master Protein	A0A0H3M3Q6	Putative short-chain type oxidoreductase OS=Mycobacterium bovis (strain BCG / Pasteur 1173P2) GN=BCG_0525c PE=3 SV=1	0	31.8508	41.4343	7	9	7	1	251	26.4	8.54	22.4725	7
FALSE	High	Master Protein	A0A0H4XX18	2-oxoglutarate ferredoxin oxidoreductase subunit alpha OS=Mycobacterium bovis GN=BOVR_12725 PE=4 SV=1	0	31.7909	32.8267	10	12	10	1	658	69.597	5.47	25.24	10
FALSE	High	Master Protein	A0A0C7DNC7	Transcriptional regulator, IclR family OS=Mycobacterium bovis GN=MBO1_02758 PE=4 SV=1	0	31.6799	44.1948	6	8	6	1	267	28.251	10.18	24.8376	6
FALSE	High	Master Protein	A0A083WDP9	ATP synthase gamma chain OS=Mycobacterium bovis GN=atpG PE=3 SV=1	0	31.6043	36.0656	7	7	7	1	305	33.869	5.48	18.8143	7
FALSE	High	Master Protein	A0A0H3M4R2	Conserved hypothetical pro-rich protease OS=Mycobacterium bovis (strain BCG / Pasteur 1173P2) GN=BCG_1828 PE=4 SV=1	0	31.5761	23.9316	7	10	7	1	585	59.99	5.74	23.25	7
FALSE	High	Master Protein	P64179	Glyceraldehyde-3-phosphate dehydrogenase OS=Mycobacterium bovis (strain ATCC BAA-935 / AF2122/97) GN=gap PE=3 SV=1	0	31.4021	41.8879	9	12	9	1	339	35.934	5.45	29.2182	9
FALSE	High	Master Protein	A0A0M4P9F3	Aminotransferase OS=Mycobacterium bovis GN=BOVR_19370 PE=4 SV=1	0	30.8908	33.9246	9	10	9	1	451	48.935	5.73	25.5268	9
FALSE	High	Master Protein	A0A083VRS2	Probable decaprenylphosphoryl-D-2-keto erythropen tose reductase OS=Mycobacterium bovis GN=BOVR_19755 PE=4 SV=1	0	30.6487	36.2205	6	9	6	1	254	27.451	7.99	13.9822	6
FALSE	High	Master Protein	A0A0K2HRE4	Transcriptional regulator OS=Mycobacterium bovis BCG GN=RN06_0323 PE=4 SV=1	0	30.6005	34.3832	9	9	9	1	381	40.707	7.11	23.5996	9
FALSE	High	Master Protein	A0A0K2HU64	Enoyl-CoA hydratase EchA8 OS=Mycobacterium bovis BCG GN=RN06_1341 PE=3 SV=1	0	30.4355	35.7977	6	7	6	1	257	27.256	5.05	16.1106	6
FALSE	High	Master Protein	C1ANT1	Argininosuccinate synthase OS=Mycobacterium bovis (strain BCG / Tokyo 172 / ATCC 35737 / TMC 1019) GN=argG PE=3 SV=1	0	30.3511	36.1809	10	10	10	1	398	43.655	5.43	17.3707	10
FALSE	High	Master Protein	A0A083VZ88	Amidase OS=Mycobacterium bovis GN=BOVR_14940 PE=3 SV=1	0	30.2729	20.7188	6	7	6	1	473	50.885	7.14	20.9921	6
FALSE	High	Master Protein	A0A083WCH2	Aminotransferase, putative OS=Mycobacterium bovis GN=BOVR_06280 PE=3 SV=1	0	30.2322	27.3481	7	11	7	1	362	37.739	6.18	24.0088	7
FALSE	High	Master Protein	A0A0C7DQ39	Uncharacterized protein OS=Mycobacterium bovis GN=MBO1_00466 PE=4 SV=1	0	30.0981	67.2727	7	11	7	1	165	17.72	9.04	22.4556	7
FALSE	High	Master Protein	A0A0M4NCA1	SAM-dependent methyltransferase OS=Mycobacterium bovis GN=BOVR_08850 PE=4 SV=1	0	30.0535	38.9558	6	8	6	1	249	27.24	6.65	19.6867	6
FALSE	High	Master Protein	A0A083VY01	Lipase OS=Mycobacterium bovis GN=BOVR_15365 PE=4 SV=1	0	29.84	31.383	6	9	6	1	376	40.11	6.4	24.0692	6
FALSE	High	Master Protein	A0A0C7DC19	Enoyl-CoA hydratase echA21 OS=Mycobacterium bovis GN=MBO1_00945 PE=4 SV=1	0	29.8333	43.8776	7	9	7	1	294	31.299	5.38	17.1363	7
FALSE	High	Master Protein	A0A083W3A4	Oxidoreductase OS=Mycobacterium bovis GN=BOVR_11900 PE=4 SV=1	0	29.6092	34.3653	8	9	8	1	323	34.965	9.13	20.0006	8
FALSE	High	Master Protein	A0A083W0K1	3-ketoacyl-ACP reductase OS=Mycobacterium bovis GN=BOVR_14290 PE=4 SV=1	0	29.6072	33.4615	7	9	7	1	260	27.123	5.94	23.8815	7
FALSE	High	Master Protein	A0A0H3M5N0	Probable transcriptional regulatory protein embR OS=Mycobacterium bovis (strain BCG / Pasteur 1173P2) GN=embR PE=4 SV=1	0	29.4459	28.866	8	9	8	1	388	41.908	7.21	24.1186	8
FALSE	High	Master Protein	A0A0H3M8U4	PPE family protein OS=Mycobacterium bovis (strain BCG / Pasteur 1173P2) GN=PPE50 PE=4 SV=1	0	29.4378	24.9344	6	19	6	1	381	38.384	4.86	27.7331	6
FALSE	High	Master Protein	A0A0H3M783	Uncharacterized protein OS=Mycobacterium bovis (strain BCG / Pasteur 1173P2) GN=BCG_2469c PE=4 SV=1	0	29.3616	34.3675	7	8	6	1	419	44.298	8.69	16.1872	7
FALSE	High	Master Protein	A0A0H3M2P5	MCE-family protein mce1B OS=Mycobacterium bovis (strain BCG / Pasteur 1173P2) GN=mce1B PE=4 SV=1	0	29.2676	33.815	8	9	8	1	346	37.692	8.91	20.0439	8
FALSE	High	Master Protein	P59955	Transaldolase OS=Mycobacterium bovis (strain ATCC BAA-935 / AF2122/97) GN=tal PE=3 SV=1	0	29.2142	32.9759	8	8	8	1	373	40.666	5.05	20.7437	8
FALSE	High	Master Protein	Q7TY15	LexA repressor OS=Mycobacterium bovis (strain ATCC BAA-935 / AF2122/97) GN=lexA PE=3 SV=2	0	29.0407	49.5763	6	6	6	1	236	24.798	5.11	18.4931	6
FALSE	High	Master Protein	P65168	Inosine-5'-monophosphate dehydrogenase OS=Mycobacterium bovis (strain ATCC BAA-935 / AF2122/97) GN=guaB PE=3 SV=1	0	28.9797	30.2457	7	9	7	1	529	54.832	6.39	21.9296	7
FALSE	High	Master Protein	A0A0Y1BJ37	Chaperone protein ClpB OS=Mycobacterium bovis BCG GN=clpB PE=3 SV=1	0	28.8967	20.9906	10	11	9	1	848	92.512	5.34	25.9809	10
FALSE	High	Master Protein	A0A0H3MBF0	Two component response transcriptional regulatory protein prrA OS=Mycobacterium bovis (strain BCG / Pasteur 1173P2) GN=prrA PE=4 SV=1	0	28.8726	49.5763	6	8	6	1	236	25.238	5.16	19.8463	6
FALSE	High	Master Protein	A0A083WLW8	ESX-3 secretion system protein eccB3 (ESX conserv ed component B3) (Type VII secretion system protein eccB3) (T7SS protein eccB3) OS=Mycobacterium bovis GN=BOVR_01495 PE=4 SV=1	0	28.8142	25.0929	8	9	8	1	538	55.908	7.28	23.6784	8
FALSE	High	Master Protein	A0A083VR36	Aminotransferase OS=Mycobacterium bovis GN=BOVR_19690 PE=4 SV=1	0	28.7979	30.1508	7	8	7	1	398	41.826	6.24	14.6404	7
FALSE	High	Master Protein	A0A083W1K1	ATP-dependent Clp protease ATP-binding subunit ClpX OS=Mycobacterium bovis GN=clpX PE=3 SV=1	0	28.7097	23.9437	7	8	7	1	426	46.753	5.16	14.7422	7
FALSE	High	Master Protein	A0A109SA50	Sulfurtransferase OS=Mycobacterium bovis BCG GN=RN06_3970 PE=4 SV=1	0	28.5943	30.8411	7	8	7	1	321	35.746	5.29	20.8354	7
FALSE	High	Master Protein	A0A120IQV7	Uncharacterized protein OS=Mycobacterium bovis BCG GN=RN06_4421 PE=4 SV=1	0	28.5932	37.5271	8	9	8	1	461	46.862	7.42	23.3392	8
FALSE	High	Master Protein	A0A0C7DKH7	Indole-3-glycerol phosphate synthase OS=Mycobacterium bovis GN=trpC PE=3 SV=1	0	28.5529	35.461	6	7	6	1	282	28.867	5.26	19.9865	6
FALSE	High	Master Protein	Q7U0A6	Multifunctional 2-oxoglutarate metabolism enzyme OS=Mycobacterium bovis (strain ATCC BAA-935 / AF2122/97) GN=kgd PE=3 SV=2	0	28.5319	11.2104	7	9	7	1	1231	135.792	6.29	17.7403	7
FALSE	High	Master Protein	P67211	Putative diacyglycerol O-acyltransferase Mb3761c OS=Mycobacterium bovis (strain ATCC BAA-935 / AF2122/97) GN=Mb3761c PE=3 SV=1	0	28.4978	41.1894	11	11	11	1	454	49.273	6.86	20.7596	11
FALSE	High	Master Protein	P66057	50S ribosomal protein L11 OS=Mycobacterium bovis (strain ATCC BAA-935 / AF2122/97) GN=rplK PE=3 SV=1	0	28.3665	47.1831	5	7	5	1	142	14.994	9.51	20.7947	5
FALSE	High	Master Protein	P67542	Bifunctional purine biosynthesis protein PurH OS=Mycobacterium bovis (strain ATCC BAA-935 / AF2122/97) GN=purH PE=3 SV=1	0	28.3525	27.5335	9	10	9	1	523	54.992	5.83	17.8179	9
FALSE	High	Master Protein	A0A0H4YBM2	Phosphoadenosine phosphosulfate reductase OS=Mycobacterium bovis GN=cysH PE=3 SV=1	0	28.32	54.3307	8	10	8	1	254	27.406	5.36	13.566	8
FALSE	High	Master Protein	A0A0Y1CB12	Mycolic acid synthase UmaA OS=Mycobacterium bovis BCG GN=RN06_0579 PE=4 SV=1	0	28.1974	33.5664	7	8	7	1	286	33.074	5.1	19.8235	7
FALSE	High	Master Protein	A0A0H3P2Y9	TRANSMEMBRANE SERINE/THREONINE-PROTEIN KINASE D PKNDa [FIRST PART] (PROTEIN KINASE D) (STPK D) OS=Mycobacterium bovis (strain ATCC BAA-935 / AF2122/97) GN=pknDa PE=3 SV=1	0	28.1667	39.8625	7	10	7	1	291	31.409	6.62	17.9635	7
FALSE	High	Master Protein	A0A109S9M5	Uncharacterized protein OS=Mycobacterium bovis BCG GN=RN06_3724 PE=3 SV=1	0	28.0764	35.1792	7	8	7	1	307	33.08	4.89	15.3343	7
FALSE	High	Master Protein	A0A0H4YD15	3-isopropylmalate dehydratase small subunit OS=Mycobacterium bovis GN=leuD PE=3 SV=1	0	28.0312	51.0101	6	7	6	1	198	21.766	5.27	17.9748	6
FALSE	High	Master Protein	A0A0H3MAT7	Probable acyl-CoA dehydrogenase fadE25 OS=Mycobacterium bovis (strain BCG / Pasteur 1173P2) GN=fadE25 PE=3 SV=1	0	27.9102	27.5064	8	9	8	1	389	41.697	5.34	13.8807	8
FALSE	High	Master Protein	A0A0H4XNZ8	Putative sporulation transcription regulator WhiA OS=Mycobacterium bovis GN=whiA PE=3 SV=1	0	27.8814	25.6881	7	9	7	1	327	35.114	9.95	21.5513	7
FALSE	High	Master Protein	A0A0H3MAY5	Possible protease IV sppA (Endopeptidase IV) OS=Mycobacterium bovis (strain BCG / Pasteur 1173P2) GN=sppA PE=4 SV=1	0	27.831	15.2488	7	7	7	1	623	65.895	6.05	17.697	7
FALSE	High	Master Protein	A0A0H4XYD0	Polyketide synthase OS=Mycobacterium bovis GN=BOVR_15175 PE=4 SV=1	0	27.647	10.0712	10	12	10	1	1827	193.119	5.67	23.2012	10
FALSE	High	Master Protein	A0A083VXB2	Glutamate--tRNA ligase OS=Mycobacterium bovis GN=gltX PE=3 SV=1	0	27.5693	31.8367	10	11	10	1	490	53.831	5.8	22.471	10
FALSE	High	Master Protein	A0A0C7DDB2	Uncharacterized protein OS=Mycobacterium bovis GN=MBO1_01595 PE=4 SV=1	0	27.4324	48.6755	7	10	7	1	302	31.783	7.52	21.459	7
FALSE	High	Master Protein	Q7TVK7	Probable long-chain-fatty-acid--CoA ligase FadD23 OS=Mycobacterium bovis (strain ATCC BAA-935 / AF2122/97) GN=fadD23 PE=3 SV=1	0	27.4124	13.3562	5	5	3	1	584	62.801	5.67	16.3312	5
FALSE	High	Master Protein	A0A083W8P4	Uncharacterized protein OS=Mycobacterium bovis GN=BOVR_07900 PE=4 SV=1	0	27.3688	35.4331	8	9	8	1	381	41.257	6.38	17.2694	8
FALSE	High	Master Protein	A0A083WMB8	Aminoglycoside 2'-N-acetyltransferase OS=Mycobacterium bovis GN=BOVR_01380 PE=4 SV=1	0	27.3315	23.7569	4	7	4	1	181	20.025	6.8	19.9027	4
FALSE	High	Master Protein	A0A0H3MA85	Probable anion transporter atpase OS=Mycobacterium bovis (strain BCG / Pasteur 1173P2) GN=BCG_3739 PE=4 SV=1	0	27.1238	40.1554	8	9	8	1	386	41.378	6.09	21.399	8
FALSE	High	Master Protein	A0A0H3MEQ5	Possible dehydrogenase OS=Mycobacterium bovis (strain BCG / Pasteur 1173P2) GN=BCG_3458c PE=4 SV=1	0	27.0516	23.4483	4	6	4	1	290	30.277	5.34	18.7933	4
FALSE	High	Master Protein	P67548	Phosphatidylserine decarboxylase proenzyme OS=Mycobacterium bovis (strain ATCC BAA-935 / AF2122/97) GN=psd PE=3 SV=1	0	27.0037	45.4545	6	8	6	1	231	24.245	9.26	18.1204	6
FALSE	High	Master Protein	A0A0C7DQH9	3-oxoacyl-[acyl-carrier-protein] synthase 3 OS=Mycobacterium bovis GN=fabH PE=3 SV=1	0	26.9613	48.6567	8	10	8	1	335	34.793	5.26	21.0359	8
FALSE	High	Master Protein	A0A0M5LB60	Aldehyde dehydrogenase OS=Mycobacterium bovis GN=BOVR_17065 PE=4 SV=1	0	26.8325	20.8748	6	8	6	1	503	52.314	5.4	21.3207	6
FALSE	High	Master Protein	A0A0H3P1T1	Conserved protein OS=Mycobacterium bovis (strain ATCC BAA-935 / AF2122/97) GN=Mb0473c PE=4 SV=1	0	26.8185	46.3158	8	10	8	1	190	21.291	9.72	17.3785	8
FALSE	High	Master Protein	A0A0K2HSS3	Ferredoxin reductase OS=Mycobacterium bovis BCG GN=RN06_0851 PE=4 SV=1	0	26.7447	27.5862	7	9	7	1	406	42.991	5.06	19.4411	7
FALSE	High	Master Protein	A0A0H4XS87	Citrate lyase subunit beta OS=Mycobacterium bovis GN=BOVR_12965 PE=3 SV=1	0	26.5416	35.8974	6	7	6	1	273	28.868	5.41	15.303	6
FALSE	High	Master Protein	A0A0H3M776	Uncharacterized protein OS=Mycobacterium bovis (strain BCG / Pasteur 1173P2) GN=BCG_0091 PE=4 SV=1	0	26.5351	34.9432	7	7	7	1	352	38.539	6.71	17.7915	7
FALSE	High	Master Protein	Q79CV0	Alkyl hydroperoxide reductase OS=Mycobacterium bovis GN=ahpC PE=4 SV=1	0	26.4754	42.5641	5	7	5	1	195	21.553	4.7	19.1746	5
FALSE	High	Master Protein	A0A0C7DNF1	Molybdopterin biosynthesis protein OS=Mycobacterium bovis GN=MBO1_02097 PE=4 SV=1	0	26.2822	35.7143	5	6	5	1	182	18.561	4.68	12.6256	5
FALSE	High	Master Protein	A1KGD1	50S ribosomal protein L10 OS=Mycobacterium bovis (strain BCG / Pasteur 1173P2) GN=rplJ PE=3 SV=1	0	26.2562	38.2022	5	7	5	1	178	18.467	8.1	19.7989	5
FALSE	High	Master Protein	A0A0H3M9G6	Cyclopropane-fatty-acyl-phospholipid synthase 1 cmaA1 OS=Mycobacterium bovis (strain BCG / Pasteur 1173P2) GN=cmaA1 PE=4 SV=1	0	26.2221	40.7666	7	9	5	1	287	32.413	6.23	22.6263	7
FALSE	High	Master Protein	A1KHG1	Enolase OS=Mycobacterium bovis (strain BCG / Pasteur 1173P2) GN=eno PE=3 SV=1	0	26.2208	22.8438	6	7	6	1	429	44.835	4.63	16.2528	6
FALSE	High	Master Protein	A0A083WMY4	Isocitrate dehydrogenase OS=Mycobacterium bovis GN=BOVR_00360 PE=4 SV=1	0	25.8215	21.6107	7	8	7	1	745	82.484	5.38	16.1922	7
FALSE	High	Master Protein	C1ANS5	N-acetyl-gamma-glutamyl-phosphate reductase OS=Mycobacterium bovis (strain BCG / Tokyo 172 / ATCC 35737 / TMC 1019) GN=argC PE=3 SV=1	0	25.7837	30.1136	6	7	6	1	352	36.282	6.71	17.3565	6
FALSE	High	Master Protein	A0A0H3P647	POSSIBLE COENZYME F420-DEPENDENT OXIDOREDUCTASE OS=Mycobacterium bovis (strain ATCC BAA-935 / AF2122/97) GN=Mb3550c PE=4 SV=1	0	25.7591	33.1412	8	10	8	1	347	37.593	5.44	19.2355	8
FALSE	High	Master Protein	P0A603	RNA polymerase sigma factor SigA OS=Mycobacterium bovis (strain ATCC BAA-935 / AF2122/97) GN=sigA PE=3 SV=1	0	25.7481	12.5	5	6	5	1	528	57.765	4.86	17.6209	5
FALSE	High	Master Protein	A0A0C7DMB8	Probable arylsulfatase AtsB (Aryl-sulfate sulphoh ydrolase) (Sulfatase) OS=Mycobacterium bovis GN=MBO1_03139 PE=4 SV=1	0	25.5277	12.0619	7	9	7	1	970	105.644	5.4	20.7735	7
FALSE	High	Master Protein	A0A0C7DAP9	Methoxy mycolic acid synthase 2 OS=Mycobacterium bovis GN=MBO1_00474 PE=4 SV=1	0	25.3993	46.6877	8	9	8	1	317	35.685	6.19	20.5459	8
FALSE	High	Master Protein	A0A0M3TNC0	Acyl-CoA synthetase OS=Mycobacterium bovis GN=BOVR_02100 PE=4 SV=1	0	25.3405	20.8547	8	9	8	1	585	63.789	6.39	22.8806	8
FALSE	High	Master Protein	A0A0H3MC83	Conserved hypothetical alanine and glycine rich protein OS=Mycobacterium bovis (strain BCG / Pasteur 1173P2) GN=BCG_3936c PE=4 SV=1	0	25.3003	33.0435	7	8	7	1	460	47.69	4.94	19.9753	7
FALSE	High	Master Protein	A0A0K2HXR1	Cystathionine beta-lyase OS=Mycobacterium bovis BCG GN=RN06_2811 PE=4 SV=1	0	25.284	41.0319	9	11	9	1	407	44.256	6.2	12.9519	9
FALSE	High	Master Protein	A0A0C7DMM4	NADH-quinone oxidoreductase subunit I OS=Mycobacterium bovis GN=nuoI PE=3 SV=1	0	25.1343	32.1101	5	8	5	1	218	24.317	7.62	18.6152	5
FALSE	High	Master Protein	A0A0Y1CX01	Multifunctional RNASE H/alpha-ribazole phosphatase/acid phosphatase OS=Mycobacterium bovis BCG GN=RN06_2738 PE=4 SV=1	0	25.1187	17.5987	7	8	7	1	608	66.109	7.85	15.3732	7
FALSE	High	Master Protein	A0A0K2HWL6	Fatty-acid--CoA ligase FadD31 OS=Mycobacterium bovis BCG GN=RN06_2386 PE=4 SV=1	0	25.1157	25.1613	9	9	9	1	620	66.269	5.71	15.6127	9
FALSE	High	Master Protein	A0A0H3P8U3	POSSIBLE CONSERVED SECRETED PROTEIN OS=Mycobacterium bovis (strain ATCC BAA-935 / AF2122/97) GN=Mb3216c PE=4 SV=1	0	25.1135	35	5	7	5	1	340	35.45	5.5	15.534	5
FALSE	High	Master Protein	A1KJ71	Acetylglutamate kinase OS=Mycobacterium bovis (strain BCG / Pasteur 1173P2) GN=argB PE=3 SV=1	0	24.9917	45.9184	8	9	8	1	294	30.917	5.78	17.9482	8
FALSE	High	Master Protein	A0A0M4NHX8	Phosphate-specific transport system accessory protein PhoU OS=Mycobacterium bovis GN=BOVR_17105 PE=3 SV=1	0	24.8662	50.2262	9	11	9	1	221	24.827	6.11	15.1382	9
FALSE	High	Master Protein	A0A0H3M4T3	Possible oxidoreductase OS=Mycobacterium bovis (strain BCG / Pasteur 1173P2) GN=BCG_0994c PE=4 SV=1	0	24.7054	51.3889	10	10	10	1	288	31.768	5.99	21.382	10
FALSE	High	Master Protein	A0A0H3P7L5	Probable phosphomannomutase pmma (Pmm) (Phosphomannose mutase) OS=Mycobacterium bovis (strain ATCC BAA-935 / AF2122/97) GN=pmma PE=4 SV=1	0	24.6364	22.5806	5	6	5	1	465	49.037	4.89	13.534	5
FALSE	High	Master Protein	A0A0H3M168	Possible hydrolase OS=Mycobacterium bovis (strain BCG / Pasteur 1173P2) GN=BCG_0076c PE=4 SV=1	0	24.5042	28.5235	4	8	4	1	298	32.111	5.48	19.8494	4
FALSE	High	Master Protein	A0A083WDN7	Transcription termination factor Rho OS=Mycobacterium bovis GN=rho PE=3 SV=1	0	24.4364	22.9236	7	7	7	1	602	65.094	5.76	18.0309	7
FALSE	High	Master Protein	A0A083VRU8	(2Fe-2S)-binding protein OS=Mycobacterium bovis GN=BOVR_19895 PE=4 SV=1	0	24.4186	23.6434	7	7	7	1	516	57.611	5.39	15.2072	7
FALSE	High	Master Protein	A0A0H3P430	Conserved protein OS=Mycobacterium bovis (strain ATCC BAA-935 / AF2122/97) GN=Mb0303c PE=4 SV=1	0	24.3484	49.0637	7	8	7	1	267	29.756	6.55	16.5785	7
FALSE	High	Master Protein	A0A0K2HQT6	30S ribosomal protein S6 OS=Mycobacterium bovis BCG GN=rpsF PE=3 SV=1	0	24.2849	57.2917	5	6	5	1	96	10.928	8.44	14.6246	5
FALSE	High	Master Protein	P0A5A8	Protoporphyrinogen oxidase OS=Mycobacterium bovis (strain ATCC BAA-935 / AF2122/97) GN=hemY PE=3 SV=1	0	24.0247	21.4602	5	6	5	1	452	46.818	6.46	13.1373	5
FALSE	High	Master Protein	A0A0H3M345	Uncharacterized protein OS=Mycobacterium bovis (strain BCG / Pasteur 1173P2) GN=BCG_1114 PE=4 SV=1	0	24.0197	36.6142	6	8	6	1	254	28.928	6.76	22.2417	6
FALSE	High	Master Protein	P0A589	Glutamine--fructose-6-phosphate aminotransferase [isomerizing] OS=Mycobacterium bovis (strain ATCC BAA-935 / AF2122/97) GN=glmS PE=3 SV=2	0	24.0125	16.8269	7	8	7	1	624	67.53	5.78	15.3754	7
FALSE	High	Master Protein	A0A0K2HTS4	50S ribosomal protein L25 OS=Mycobacterium bovis BCG GN=rplY PE=3 SV=1	0	23.9605	34.8837	4	6	4	1	215	22.428	4.88	8.76825	4
FALSE	High	Master Protein	A0A0K2HTW1	Ribosomal RNA small subunit methyltransferase A OS=Mycobacterium bovis BCG GN=rsmA PE=3 SV=1	0	23.9391	24.6057	6	6	6	1	317	34.624	9.88	11.1186	6
FALSE	High	Master Protein	A0A0H3M4D7	Probable dehydrogenase/reductase OS=Mycobacterium bovis (strain BCG / Pasteur 1173P2) GN=BCG_0822 PE=4 SV=1	0	23.9209	31.1864	5	8	5	1	295	30.427	5.24	16.5413	5
FALSE	High	Master Protein	A0A0H3MDG1	Uncharacterized protein OS=Mycobacterium bovis (strain BCG / Pasteur 1173P2) GN=TB15.3 PE=3 SV=1	0	23.8433	49.3151	6	8	1	1	146	15.303	5.83	17.9569	6
FALSE	High	Master Protein	A0A0H3M6W0	Probable conserved membrane protein OS=Mycobacterium bovis (strain BCG / Pasteur 1173P2) GN=BCG_1815 PE=4 SV=1	0	23.8243	17.9842	7	9	7	1	506	53.669	7.12	20.6998	7
FALSE	High	Master Protein	Q7U2D4	Putative S-adenosyl-L-methionine-dependent methyltransferase Mb0289 OS=Mycobacterium bovis (strain ATCC BAA-935 / AF2122/97) GN=Mb0289 PE=3 SV=1	0	23.7872	39.0728	7	7	7	1	302	32.978	5.01	16.8842	7
FALSE	High	Master Protein	A0A0C7DG55	Mycothiol acetyltransferase OS=Mycobacterium bovis GN=mshD PE=3 SV=1	0	23.7844	48.8889	8	9	8	1	315	33.609	8.5	13.1479	8
FALSE	High	Master Protein	A0A0H3M4K0	PPE family protein OS=Mycobacterium bovis (strain BCG / Pasteur 1173P2) GN=PPE22 PE=4 SV=1	0	23.7399	35.5844	5	9	5	1	385	38.361	5.1	20.3332	5
FALSE	High	Master Protein	A0A0H4XWW6	Uncharacterized protein OS=Mycobacterium bovis GN=BOVR_12480 PE=4 SV=1	0	23.7013	13.2616	4	6	4	1	279	31.01	6.86	14.636	4
FALSE	High	Master Protein	A0A0H3M7V3	Uncharacterized protein OS=Mycobacterium bovis (strain BCG / Pasteur 1173P2) GN=TB18.6 PE=4 SV=1	0	23.5973	56.8182	7	8	7	1	176	18.622	5.73	16.4967	7
FALSE	High	Master Protein	A0A0C7DC36	Uncharacterized protein OS=Mycobacterium bovis GN=MBO1_01075 PE=4 SV=1	0	23.5635	40.3727	5	6	5	1	161	17.686	10.48	16.5675	5
FALSE	High	Master Protein	A0A0H3P5C5	Conserved protein OS=Mycobacterium bovis (strain ATCC BAA-935 / AF2122/97) GN=Mb2979c PE=4 SV=1	0	23.5446	33.0218	6	7	6	1	321	35.909	8.87	14.5894	6
FALSE	High	Master Protein	A0A083WGQ8	Phosphate-binding protein PstS OS=Mycobacterium bovis GN=BOVR_04930 PE=3 SV=1	0	23.5381	31.6216	6	6	6	1	370	37.825	5.15	16.9136	6
FALSE	High	Master Protein	A1KGW3	Putative S-adenosyl-L-methionine-dependent methyltransferase BCG_0883 OS=Mycobacterium bovis (strain BCG / Pasteur 1173P2) GN=BCG_0883 PE=3 SV=1	0	23.5251	37.5415	6	7	6	1	301	33.395	4.61	14.0262	6
FALSE	High	Master Protein	A0A083VZD4	Glutamine ABC transporter permease OS=Mycobacterium bovis GN=BOVR_13320 PE=3 SV=1	0	23.4979	31.8052	6	7	6	1	349	36.003	9.96	16.6327	6
FALSE	High	Master Protein	A0A0C7DAJ2	Uncharacterized protein OS=Mycobacterium bovis GN=MBO1_00413 PE=4 SV=1	0	23.4509	33.3333	6	7	6	1	192	21.196	9.74	16.8814	6
FALSE	High	Master Protein	A0A0C7DKY3	Serine/threonine-protein kinase PknB OS=Mycobacterium bovis GN=MBO_300559 PE=3 SV=1	0	23.4242	26.1981	10	11	10	1	626	66.471	5.45	15.2198	10
FALSE	High	Master Protein	A0A083VVT9	GTPase EngC OS=Mycobacterium bovis GN=BOVR_16745 PE=3 SV=1	0	23.3822	30	5	8	5	1	330	34.854	7.8	14.6174	5
FALSE	High	Master Protein	A0A0H3P5T6	Conserved protein OS=Mycobacterium bovis (strain ATCC BAA-935 / AF2122/97) GN=Mb3230c PE=4 SV=1	0	23.3815	26.0274	5	7	5	1	292	31.332	6.81	17.2887	5
FALSE	High	Master Protein	A0A083VU83	Conserved protein (Diacylglycerol kinase catalyti c domain-containing protein) OS=Mycobacterium bovis GN=BOVR_16680 PE=4 SV=1	0	23.3198	34.2679	7	10	7	1	321	34.453	9.04	22.1106	7
FALSE	High	Master Protein	A0A0H3M823	Aminomethyltransferase OS=Mycobacterium bovis (strain BCG / Pasteur 1173P2) GN=gcvT PE=3 SV=1	0	23.2996	27.7045	7	7	7	1	379	39.604	5.4	13.8373	7
FALSE	High	Master Protein	A0A0K2HWH2	Anthranilate synthase component I OS=Mycobacterium bovis BCG GN=RN06_1964 PE=4 SV=1	0	23.2484	20.3488	9	10	9	1	516	55.814	5.16	22.3588	9
FALSE	High	Master Protein	A0A0K2HX55	ESAT-6 like protein EsxN OS=Mycobacterium bovis BCG GN=RN06_2224 PE=4 SV=1	0	23.2112	80.8511	5	7	5	1	94	9.936	4.93	17.1361	5
FALSE	High	Master Protein	A0A0C7DDW4	Conserved protein OS=Mycobacterium bovis GN=MBO1_01618 PE=4 SV=1	0	23.2062	56.4103	5	8	5	1	78	8.502	8.97	17.3481	5
FALSE	High	Master Protein	A0A0H3MAQ2	Galactofuranosyl transferase OS=Mycobacterium bovis (strain BCG / Pasteur 1173P2) GN=BCG_3870c PE=4 SV=1	0	23.1919	10.832	5	7	5	1	637	71.461	7.15	14.4215	5
FALSE	High	Master Protein	A0A0K2HSR9	30S ribosomal protein S7 OS=Mycobacterium bovis BCG GN=rpsG PE=3 SV=1	0	23.1396	60.2564	7	8	7	1	156	17.59	10.56	19.7078	7
FALSE	High	Master Protein	A0A0H3P3Z4	Probable 3-hydroxyacyl-thioester dehydratase htdx OS=Mycobacterium bovis (strain ATCC BAA-935 / AF2122/97) GN=htdx PE=4 SV=1	0	22.9461	28.9286	4	5	4	1	280	30.176	10.04	15.3345	4
FALSE	High	Master Protein	A0A120IQ80	Peptide chain release factor 2 OS=Mycobacterium bovis BCG GN=prfB PE=3 SV=1	0	22.6911	19.5767	4	5	4	1	378	42.099	4.94	16.2346	4
FALSE	High	Master Protein	F8VBW0	Putative uncharacterized protein (Fragment) OS=Mycobacterium bovis PE=3 SV=1	0	22.6085	47.7941	6	8	1	1	136	14.194	5.88	14.9986	6
FALSE	High	Master Protein	A0A0H3P6J3	POSSIBLE OSMOPROTECTANT (GLYCINE BETAINE/CARNITINE/CHOLINE/L-PROLINE) TRANSPORT ATP-BINDING PROTEIN ABC TRANSPORTER PROV OS=Mycobacterium bovis (strain ATCC BAA-935 / AF2122/97) GN=proV PE=4 SV=1	0	22.5459	25.266	5	6	5	1	376	39.546	7.5	12.1214	5
FALSE	High	Master Protein	A0A0H3MC09	Putative oxidoreductase OS=Mycobacterium bovis (strain BCG / Pasteur 1173P2) GN=BCG_3852 PE=4 SV=1	0	22.509	27.115	8	8	8	1	461	50.132	7.65	19.2261	8
FALSE	High	Master Protein	A0A0K2HU30	Phosphoribosylformylglycinamidine cyclo-ligase OS=Mycobacterium bovis BCG GN=purM PE=3 SV=1	0	22.4858	21.1538	5	7	5	1	364	38.369	6.46	13.9588	5
FALSE	High	Master Protein	A0A0K2HUG7	Phosphate-binding protein PstS OS=Mycobacterium bovis BCG GN=RN06_1155 PE=3 SV=1	0	22.46	18.9189	5	5	5	1	370	37.93	6.07	14.3392	5
FALSE	High	Master Protein	A0A0K2HQK1	Cell wall synthesis protein CwsA OS=Mycobacterium bovis BCG GN=cwsA PE=3 SV=1	0	22.3859	54.4828	4	6	4	1	145	15.671	11.41	17.3123	4
FALSE	High	Master Protein	A0A0M3TNA3	Uncharacterized protein OS=Mycobacterium bovis GN=BOVR_01745 PE=4 SV=1	0	22.3652	37.8486	6	7	6	1	251	27.493	5.62	14.9663	6
FALSE	High	Master Protein	A0A083VV02	Acyl-CoA synthetase OS=Mycobacterium bovis GN=BOVR_15245 PE=4 SV=1	0	22.3419	15.461	6	8	6	1	705	75.151	5.24	15.1988	6
FALSE	High	Master Protein	A0A0H3MG04	Uncharacterized protein OS=Mycobacterium bovis (strain BCG / Pasteur 1173P2) GN=BCG_3966 PE=4 SV=1	0	22.2855	17.4564	6	6	6	1	802	83.958	6.18	16.3145	6
FALSE	High	Master Protein	A0A0H3MBU2	Cell division protein FtsZ OS=Mycobacterium bovis (strain BCG / Pasteur 1173P2) GN=ftsZ PE=3 SV=1	0	22.1196	34.5646	7	9	7	1	379	38.732	4.72	14.7364	7
FALSE	High	Master Protein	A0A0C7DH90	Acyl-[acyl-carrier protein] desaturase (EC 1.14.1 9.2) OS=Mycobacterium bovis GN=MBO1_02319 PE=4 SV=1	0	22.0794	24.735	5	6	5	1	283	32.361	5.01	16.7387	5
FALSE	High	Master Protein	A0A109S6W1	Nucleoside triphosphate pyrophosphohydrolase OS=Mycobacterium bovis BCG GN=RN06_1276 PE=4 SV=1	0	22.0046	22.3926	4	7	4	1	326	35.522	5.39	15.888	4
FALSE	High	Master Protein	A0A0K2HQZ5	Diacylglycerol acyltransferase/mycolyltransferase Ag85C OS=Mycobacterium bovis BCG GN=RN06_0163 PE=4 SV=1	0	21.9908	21.7647	6	7	6	1	340	36.748	6.34	15.6206	6
FALSE	High	Master Protein	A0A083W8A5	Uncharacterized protein OS=Mycobacterium bovis GN=BOVR_10335 PE=4 SV=1	0	21.9592	27.5194	4	5	4	1	258	27.306	4.92	16.9161	4
FALSE	High	Master Protein	A0A0H3MAK0	Probable conserved membrane protein OS=Mycobacterium bovis (strain BCG / Pasteur 1173P2) GN=BCG_0520c PE=4 SV=1	0	21.9521	31.6092	6	8	6	1	348	37.025	9.26	9.6226	6
FALSE	High	Master Protein	P66985	Tryptophan synthase beta chain OS=Mycobacterium bovis (strain ATCC BAA-935 / AF2122/97) GN=trpB PE=3 SV=1	0	21.8543	39.0995	8	8	8	1	422	44.617	5.66	16.5734	8
FALSE	High	Master Protein	A0A120IPS6	Phthiotriol/phenolphthiotriol dimycocerosates methyltransferase OS=Mycobacterium bovis BCG GN=RN06_3579 PE=4 SV=1	0	21.8204	34.8148	7	10	7	1	270	30.632	7.56	15.2712	7
FALSE	High	Master Protein	A0A0C7DC15	Succinate-semialdehyde dehydrogenase OS=Mycobacterium bovis GN=BOVR_01235 PE=3 SV=1	0	21.8139	28.2276	6	6	6	1	457	48.514	5.1	12.4514	6
FALSE	High	Master Protein	C1AL55	30S ribosomal protein S5 OS=Mycobacterium bovis (strain BCG / Tokyo 172 / ATCC 35737 / TMC 1019) GN=rpsE PE=3 SV=1	0	21.8134	27.2727	5	8	5	1	220	22.874	10.17	13.9059	5
FALSE	High	Master Protein	A0A0C7DDK4	Uncharacterized protein OS=Mycobacterium bovis GN=MBO1_01508 PE=4 SV=1	0	21.8084	43.0712	7	9	7	1	267	28.43	5.07	13.6734	7
FALSE	High	Master Protein	A0A0D1Q6X6	Mrr restriction system protein (Probable restrict ion system protein Mrr) OS=Mycobacterium bovis GN=MBO1_01188 PE=4 SV=1	0	21.6876	28.1046	7	9	7	1	306	33.627	5.78	11.7481	7
FALSE	High	Master Protein	A0A0H4YCC1	Soluble pyridine nucleotide transhydrogenase OS=Mycobacterium bovis GN=sthA PE=3 SV=1	0	21.6535	16.5605	5	7	5	1	471	50.997	6	12.4599	5
FALSE	High	Master Protein	A0A0H4G129	Glycerol-3-phosphate dehydrogenase OS=Mycobacterium bovis BCG GN=RN06_3991 PE=3 SV=1	0	21.3843	17.6068	5	6	5	1	585	62.739	6.74	11.9165	5
FALSE	High	Master Protein	A0A0H3P1M1	Esx conserved component ecca3. esx-3 type vii secretion system protein OS=Mycobacterium bovis (strain ATCC BAA-935 / AF2122/97) GN=ecca3 PE=4 SV=1	0	21.3219	20.2853	8	8	8	1	631	68.007	5.29	16.0808	8
FALSE	High	Master Protein	A0A0H3P726	PROBABLE PEPTIDYL-PROLYL CIS-TRANS ISOMERASE B PPIB (CYCLOPHILIN) (PPIASE) (ROTAMASE) (PEPTIDYLPROLYL ISOMERASE) OS=Mycobacterium bovis (strain ATCC BAA-935 / AF2122/97) GN=ppiB PE=4 SV=1	0	21.2739	23.7013	5	6	5	1	308	32.399	9.38	16.9208	5
FALSE	High	Master Protein	P0A5X7	30S ribosomal protein S3 OS=Mycobacterium bovis (strain ATCC BAA-935 / AF2122/97) GN=rpsC PE=3 SV=2	0	21.1545	37.2263	6	7	6	1	274	30.002	10.14	17.4846	6
FALSE	High	Master Protein	A0A0H3M5G5	Possible alternative RNA polymerase sigma factor sigI OS=Mycobacterium bovis (strain BCG / Pasteur 1173P2) GN=sigI PE=3 SV=1	0	21.1031	23.6908	5	6	5	1	401	44.277	6.8	16.8802	5
FALSE	High	Master Protein	A0A0H3M4I7	Tyrosine--tRNA ligase OS=Mycobacterium bovis (strain BCG / Pasteur 1173P2) GN=tyrS PE=3 SV=1	0	21.0677	24.7642	5	7	5	1	424	46.302	6.48	15.8982	5
FALSE	High	Master Protein	A0A0H4YDS9	GDP-mannose pyrophosphorylase OS=Mycobacterium bovis GN=BOVR_16920 PE=4 SV=1	0	21.0157	31.7549	7	7	7	1	359	37.834	5.21	13.4199	7
FALSE	High	Master Protein	P0A5Y7	Enoyl-[acyl-carrier-protein] reductase [NADH] OS=Mycobacterium bovis (strain ATCC BAA-935 / AF2122/97) GN=inhA PE=3 SV=1	0	20.7897	32.7138	5	6	5	1	269	28.51	6.13	11.4382	5
FALSE	High	Master Protein	A0A0C7DFC3	Diacylglycerol O-acyltransferase OS=Mycobacterium bovis GN=MBO1_01658 PE=3 SV=1	0	20.7773	22.6966	6	7	6	1	445	47.707	7.83	17.6805	6
FALSE	High	Master Protein	A0A0C7DHY3	Conserved protein OS=Mycobacterium bovis GN=MBO1_02631 PE=4 SV=1	0	20.7622	32.1555	6	9	6	1	283	30.505	5.39	18.946	6
FALSE	High	Master Protein	P64896	UPF0749 protein Mb1856 OS=Mycobacterium bovis (strain ATCC BAA-935 / AF2122/97) GN=Mb1856 PE=3 SV=1	0	20.7601	31.1644	4	6	4	1	292	30.626	6.81	10.7622	4
FALSE	High	Master Protein	A0A0H3ME32	Probable NADH dehydrogenase I (Chain F) nuoF OS=Mycobacterium bovis (strain BCG / Pasteur 1173P2) GN=nuoF PE=4 SV=1	0	20.7134	24.9438	5	5	5	1	445	48.071	6.18	11.0115	5
FALSE	High	Master Protein	A0A0H3M4X5	Hypothetical invasion protein OS=Mycobacterium bovis (strain BCG / Pasteur 1173P2) GN=BCG_1539 PE=4 SV=1	0	20.6537	21.3983	6	7	6	1	472	49.777	9.01	18.1618	6
FALSE	High	Master Protein	A0A0K2HU71	Oxidoreductase OS=Mycobacterium bovis BCG GN=RN06_1433 PE=4 SV=1	0	20.6498	46.8	6	6	6	1	250	25.772	6.6	13.9062	6
FALSE	High	Master Protein	A0A0K2I1N1	dTDP-4-dehydrorhamnose reductase OS=Mycobacterium bovis BCG GN=RN06_3953 PE=4 SV=1	0	20.6295	32.5658	6	6	6	1	304	32.035	6.89	12.6661	6
FALSE	High	Master Protein	A0A0U3NBE0	Uncharacterized protein OS=Mycobacterium bovis GN=BOVR_01195 PE=4 SV=1	0	20.5542	16.9014	5	7	5	1	426	46.14	5.07	10.7687	5
FALSE	High	Master Protein	A0A0K2HX10	Uncharacterized protein OS=Mycobacterium bovis BCG GN=RN06_2529 PE=4 SV=1	0	20.4871	50.7463	5	7	5	1	134	14.805	9.66	10.5188	5
FALSE	High	Master Protein	A0A0H3MAZ1	Uncharacterized protein OS=Mycobacterium bovis (strain BCG / Pasteur 1173P2) GN=BCG_0788 PE=4 SV=1	0	20.4685	52.1978	5	6	5	1	182	19.136	5.53	16.0196	5
FALSE	High	Master Protein	A0A083W9E5	ESX-5 secretion system protein EccC5 (ESX conserv ed component C5) (Type VII secretion system protein EccC5) (T7SS protein EccC5) OS=Mycobacterium bovis GN=MBO1_03895 PE=4 SV=1	0	20.4626	7.26096	6	7	6	1	1391	152.675	5.45	18.1985	6
FALSE	High	Master Protein	A0A0H3P1X1	POSSIBLE PEROXIDASE BPOC (NON-HAEM PEROXIDASE) OS=Mycobacterium bovis (strain ATCC BAA-935 / AF2122/97) GN=bpoC PE=4 SV=1	0	20.4247	35.8779	5	8	5	1	262	28.363	5.47	21.4759	5
FALSE	High	Master Protein	A0A083WK19	Anthranilate synthase OS=Mycobacterium bovis GN=BOVR_00080 PE=4 SV=1	0	20.3998	42.6724	5	7	5	1	232	24.63	6.51	13.4054	5
FALSE	High	Master Protein	A0A0C7DIN0	S-adenosyl-L-methionine-dependent methyltransferase OS=Mycobacterium bovis GN=MBO1_02851 PE=3 SV=1	0	20.3967	22.4138	5	6	5	1	348	38.174	5.31	13.9896	5
FALSE	High	Master Protein	Q7U0X4	Response regulator MprA OS=Mycobacterium bovis (strain ATCC BAA-935 / AF2122/97) GN=mprA PE=1 SV=1	0	20.3259	36.5217	6	6	6	1	230	25.908	5.44	13.7734	6
FALSE	High	Master Protein	A0A0H3P451	Conserved protein OS=Mycobacterium bovis (strain ATCC BAA-935 / AF2122/97) GN=Mb2068c PE=4 SV=1	0	20.293	40.3774	8	8	8	1	265	29.073	9.11	15.2336	8
FALSE	High	Master Protein	A0A0H3M2V9	30S ribosomal protein S17 OS=Mycobacterium bovis (strain BCG / Pasteur 1173P2) GN=rpsQ PE=3 SV=1	0	20.2617	52.2059	6	6	6	1	136	14.863	10.56	16.7392	6
FALSE	High	Master Protein	A0A0C7DQP2	2,3-bisphosphoglycerate-dependent phosphoglycerate mutase OS=Mycobacterium bovis GN=gpmA PE=3 SV=1	0	20.1221	35.9712	5	6	5	1	278	30.483	7.14	13.0887	5
FALSE	High	Master Protein	A0A0H3M1J6	Probable molybdopterin biosynthesis protein moeA2 OS=Mycobacterium bovis (strain BCG / Pasteur 1173P2) GN=moeA2 PE=4 SV=1	0	20.0461	19.7531	5	6	5	1	405	41.977	5.96	15.9644	5
FALSE	High	Master Protein	P69231	30S ribosomal protein S18 1 OS=Mycobacterium bovis (strain ATCC BAA-935 / AF2122/97) GN=rpsR1 PE=3 SV=1	0	20.0069	30.9524	3	6	3	1	84	9.537	10.61	13.9346	3
FALSE	High	Master Protein	C1AL56	50S ribosomal protein L30 OS=Mycobacterium bovis (strain BCG / Tokyo 172 / ATCC 35737 / TMC 1019) GN=rpmD PE=3 SV=1	0	19.9718	43.0769	2	4	2	1	65	7.342	11.82	13.509	2
FALSE	High	Master Protein	A0A0G4DQW9	MCE family protein 1A (Mce-family protein Mce1A) OS=Mycobacterium bovis GN=MBO_502705 PE=4 SV=1	0	19.9638	27.3128	6	8	6	1	454	47.719	5.35	14.488	6
FALSE	High	Master Protein	A0A0H3MBA2	Possible acyl-CoA thiolase fadA OS=Mycobacterium bovis (strain BCG / Pasteur 1173P2) GN=fadA PE=3 SV=1	0	19.9446	19.8511	4	6	4	1	403	42.358	5.4	11.4818	4
FALSE	High	Master Protein	P0C2T1	Diacylglycerol acyltransferase/mycolyltransferase Ag85A OS=Mycobacterium bovis (strain ATCC BAA-935 / AF2122/97) GN=fbpA PE=3 SV=1	0	19.8877	9.46746	3	3	3	1	338	35.664	6.55	10.0914	3
FALSE	High	Master Protein	D6MJP6	Diacylglycerol acyltransferase/mycolyltransferase Ag85A OS=Mycobacterium bovis GN=fbpB PE=4 SV=1	0	19.8775	20.3077	4	4	4	1	325	34.525	5.94	14.3125	4
FALSE	High	Master Protein	A0A0C7DHK3	Histone-like protein hns OS=Mycobacterium bovis GN=MBO1_03200 PE=4 SV=1	0	19.8339	28.3688	3	4	3	1	141	14.624	10.74	12.5321	3
FALSE	High	Master Protein	A0A0H3MC04	Possible conserved membrane protein OS=Mycobacterium bovis (strain BCG / Pasteur 1173P2) GN=BCG_2219 PE=4 SV=1	0	19.8135	26.087	4	5	4	1	230	24.356	8.41	15.6351	4
FALSE	High	Master Protein	A0A0C7DT22	Probable lipid-transfer protein Ltp1 OS=Mycobacterium bovis GN=MBO_302501 PE=3 SV=1	0	19.8022	23.8329	5	6	5	1	407	43.608	5.69	13.9525	5
FALSE	High	Master Protein	A0A0K2HS11	Superoxide dismutase [Cu-Zn] OS=Mycobacterium bovis BCG GN=RN06_0536 PE=3 SV=1	0	19.7985	37.5	3	5	3	1	240	23.83	6.44	12.2053	3
FALSE	High	Master Protein	A0A0H3P6T3	Probable alanine and proline rich membrane-anchored mycosin mycp2 (Serine protease) (Subtilisin-like protease) (Subtilase-like) (Mycosin-2) OS=Mycobacterium bovis (strain ATCC BAA-935 / AF2122/97) GN=mycp2 PE=4 SV=1	0	19.795	13.2727	5	8	5	1	550	55.559	6.05	17.0729	5
FALSE	High	Master Protein	A0A0H3MAD0	Possible nitrogen fixation related protein OS=Mycobacterium bovis (strain BCG / Pasteur 1173P2) GN=BCG_1526 PE=4 SV=1	0	19.7023	47.5309	4	8	4	1	162	17.7	5.06	18.6001	4
FALSE	High	Master Protein	A0A083WDK0	Amidase OS=Mycobacterium bovis GN=BOVR_06695 PE=3 SV=1	0	19.6504	24.026	6	8	6	1	462	49.05	7.17	11.5152	6
FALSE	High	Master Protein	C1ANN5	Tryptophan synthase alpha chain OS=Mycobacterium bovis (strain BCG / Tokyo 172 / ATCC 35737 / TMC 1019) GN=trpA PE=3 SV=1	0	19.6374	37.7778	6	7	6	1	270	27.71	5.06	15.716	6
FALSE	High	Master Protein	A0A0C7DGY2	Conserved protein OS=Mycobacterium bovis GN=MBO1_02912 PE=4 SV=1	0	19.6327	21.7544	4	5	4	1	285	30.666	7.58	14.494	4
FALSE	High	Master Protein	A0A0H4FYQ9	Adenylyltransferase/sulfurtransferase OS=Mycobacterium bovis BCG GN=RN06_3882 PE=4 SV=1	0	19.4877	23.9796	6	6	6	1	392	42.147	5.5	13.7564	6
FALSE	High	Master Protein	A0A0C7DUG5	Uncharacterized protein OS=Mycobacterium bovis GN=MBO1_03890 PE=4 SV=1	0	19.4875	37.5	4	4	4	1	168	17.81	5.5	13.1428	4
FALSE	High	Master Protein	A0A0H3MHD1	Possible transmembrane cation transporter OS=Mycobacterium bovis (strain BCG / Pasteur 1173P2) GN=BCG_3225c PE=4 SV=1	0	19.4766	10.1408	3	3	3	1	355	38.11	7.56	12.4198	3
FALSE	High	Master Protein	A0A083WC22	ABC transporter ATP-binding protein OS=Mycobacterium bovis GN=BOVR_06480 PE=4 SV=1	0	19.3501	38.2637	7	7	7	1	311	33.456	6.39	14.309	7
FALSE	High	Master Protein	A0A0H3P1H4	PHOSPHOTYROSINE PROTEIN PHOSPHATASE PTPB (PROTEIN-TYROSINE-PHOSPHATASE) (PTPase) OS=Mycobacterium bovis (strain ATCC BAA-935 / AF2122/97) GN=ptbB PE=4 SV=1	0	19.23	21.0145	5	6	5	1	276	30.077	6.58	14.9382	5
FALSE	High	Master Protein	A0A0H3M4E5	Probable protease II ptrB (Oligopeptidase B) OS=Mycobacterium bovis (strain BCG / Pasteur 1173P2) GN=ptrB PE=4 SV=1	0	19.16	17.1071	7	7	7	1	719	80.332	5.16	15.9045	7
FALSE	High	Master Protein	A0A083W979	Urease accessory protein UreG OS=Mycobacterium bovis GN=ureG PE=3 SV=1	0	19.1585	24.5536	4	4	4	1	224	23.334	5.3	12.3226	4
FALSE	High	Master Protein	A0A0K2HS30	Serine/threonine-protein kinase PknG OS=Mycobacterium bovis BCG GN=RN06_0511 PE=4 SV=1	0	19.0728	14.1333	7	8	7	1	750	81.527	5.8	13.7698	7
FALSE	High	Master Protein	A0A0H3MES3	Probable inosine-5'-monophosphate dehydrogenase guaB3 OS=Mycobacterium bovis (strain BCG / Pasteur 1173P2) GN=guaB3 PE=4 SV=1	0	18.9892	20	4	6	4	1	375	38.967	5.34	12.9751	4
FALSE	High	Master Protein	A0A0H3P1U9	Conserved protein OS=Mycobacterium bovis (strain ATCC BAA-935 / AF2122/97) GN=Mb0475 PE=4 SV=1	0	18.9604	28.4091	5	5	5	1	264	30.166	6.05	14.6055	5
FALSE	High	Master Protein	A0A0K2I025	Ketol-acid reductoisomerase OS=Mycobacterium bovis BCG GN=ilvC PE=3 SV=1	0	18.8746	32.9377	8	8	8	1	337	36.512	5.12	9.68186	8
FALSE	High	Master Protein	A0A0H3M3Q9	Methionine--tRNA ligase OS=Mycobacterium bovis (strain BCG / Pasteur 1173P2) GN=metS PE=3 SV=1	0	18.8362	13.6802	4	6	4	1	519	57.957	5.8	17.0786	4
FALSE	High	Master Protein	A0A083VSX5	Uncharacterized protein OS=Mycobacterium bovis GN=BOVR_18410 PE=4 SV=1	0	18.8279	24.8945	4	7	4	1	237	27.423	7.88	18.2965	4
FALSE	High	Master Protein	A0A0Y1D3G7	Glycolate oxidase subunit GlcD OS=Mycobacterium bovis BCG GN=RN06_2795 PE=4 SV=1	0	18.7967	29.1939	7	7	7	1	459	48.022	5.02	16.2652	7
FALSE	High	Master Protein	A0A0K2I243	Bifunctional penicillin-insensitive transglycosylase/penicillin-sensitive transpeptidase OS=Mycobacterium bovis BCG GN=RN06_4490 PE=4 SV=1	0	18.7567	9.01235	5	7	5	1	810	84.583	5.52	16.6478	5
FALSE	High	Master Protein	A0A0K2HT88	Demethylmenaquinone methyltransferase OS=Mycobacterium bovis BCG GN=menG PE=3 SV=1	0	18.7173	19.2308	3	3	3	1	234	25.283	9.98	10.197	3
FALSE	High	Master Protein	A0A0G2Q9D6	DNA gyrase subunit B OS=Mycobacterium bovis (strain BCG / Pasteur 1173P2) GN=gyrB1 PE=1 SV=1	0	18.7013	14.5658	7	7	7	1	714	78.407	6.62	9.34239	7
FALSE	High	Master Protein	G7QRR6	Universal stress protein family OS=Mycobacterium bovis BCG str. Mexico PE=3 SV=1	0	18.5873	20.5387	5	6	5	1	297	31.632	5.76	12.2304	5
FALSE	High	Master Protein	A0A0C7DET3	S-adenosyl-L-methionine-dependent methyltransferase OS=Mycobacterium bovis GN=MBO1_01400 PE=3 SV=1	0	18.5364	35.473	6	7	6	1	296	33.662	9.04	12.2497	6
FALSE	High	Master Protein	A0A0C7DD30	Oxidoreductase, short-chain dehydrogenase/reducta se family OS=Mycobacterium bovis GN=MBO1_01506 PE=3 SV=1	0	18.519	24.5161	5	5	5	1	310	33.07	9.52	9.79032	5
FALSE	High	Master Protein	A0A0H3M1W4	Uncharacterized protein OS=Mycobacterium bovis (strain BCG / Pasteur 1173P2) GN=esxG PE=4 SV=1	0	18.4178	65.9794	2	4	2	1	97	9.772	6.51	9.06931	2
FALSE	High	Master Protein	A0A0H3P1I3	PROBABLE CONSERVED MCE ASSOCIATED PROTEIN OS=Mycobacterium bovis (strain ATCC BAA-935 / AF2122/97) GN=Mb0183 PE=4 SV=1	0	18.4105	41.3043	5	6	5	1	184	20.151	8.22	13.5322	5
FALSE	High	Master Protein	A0A109SA20	Protein translocase subunit SecA OS=Mycobacterium bovis BCG GN=secA PE=3 SV=1	0	18.2599	21.1399	10	11	10	1	965	107.536	5.4	9.23263	10
FALSE	High	Master Protein	A0A0Y1C6S8	Two-component system transcriptional regulator OS=Mycobacterium bovis BCG GN=RN06_1984 PE=4 SV=1	0	18.2325	25.9615	4	6	4	1	208	22.972	5.11	12.3898	4
FALSE	High	Master Protein	A0A0K2HW87	PPE family protein PPE29 OS=Mycobacterium bovis BCG GN=RN06_2234 PE=4 SV=1	0	18.2133	29.078	4	8	4	1	423	41.451	4.89	14.7937	4
FALSE	High	Master Protein	A0A0H3M4G4	Probable dehydrogenase FAD flavoprotein gmc oxidoreductase OS=Mycobacterium bovis (strain BCG / Pasteur 1173P2) GN=BCG_1338 PE=3 SV=1	0	18.2117	19.5076	6	6	6	1	528	57.295	7.31	11.3705	6
FALSE	High	Master Protein	A0A083W2S8	Branched-chain alpha-keto acid dehydrogenase subunit E2 OS=Mycobacterium bovis GN=BOVR_12950 PE=3 SV=1	0	18.1244	19.084	5	6	5	1	393	41.036	5.3	10.1849	5
FALSE	High	Master Protein	A0A083VRC1	ESX-1 secretion-associated protein EspF OS=Mycobacterium bovis GN=BOVR_20135 PE=4 SV=1	0	18.1091	48.5437	3	5	3	1	103	10.611	6.52	12.762	3
FALSE	High	Master Protein	A0A083VQG6	ABC transporter ATP-binding protein OS=Mycobacterium bovis GN=BOVR_19705 PE=4 SV=1	0	18.0809	30.7692	5	6	5	1	273	29.974	6.74	14.0449	5
FALSE	High	Master Protein	A0A0C7DB73	Magnesium chelatase, putative (Probable methanol dehydrogenase transcriptional regulatory protein MoxR2) OS=Mycobacterium bovis GN=MBO1_00865 PE=4 SV=1	0	18.0776	29.3296	7	8	6	1	358	37.913	5.69	14.881	7
FALSE	High	Master Protein	A0A083VR97	Ferritin OS=Mycobacterium bovis GN=BOVR_20010 PE=4 SV=1	0	18.0673	36.4641	6	7	6	1	181	20.429	4.83	18.3732	6
FALSE	High	Master Protein	Q7U0Z1	Succinyl-CoA ligase [ADP-forming] subunit beta OS=Mycobacterium bovis (strain ATCC BAA-935 / AF2122/97) GN=sucC PE=3 SV=1	0	18.0671	22.9974	6	7	6	1	387	40.872	5.11	14.5338	6
FALSE	High	Master Protein	A0A083VTW4	Nitroreductase OS=Mycobacterium bovis GN=BOVR_17660 PE=4 SV=1	0	18.028	30.8411	5	5	5	1	214	23.718	6.39	11.3957	5
FALSE	High	Master Protein	A0A0C7DGQ1	Uncharacterized glycosyl hydrolase Rv3401/MT3509 OS=Mycobacterium bovis GN=MBO1_02853 PE=4 SV=1	0	18.0183	10.9415	5	5	5	1	786	87.261	5.81	13.8794	5
FALSE	High	Master Protein	A0A0H3M6F0	Uncharacterized protein OS=Mycobacterium bovis (strain BCG / Pasteur 1173P2) GN=BCG_2488c PE=4 SV=1	0	17.9388	58.6826	4	6	4	1	167	17.278	5.26	12.2382	4
FALSE	High	Master Protein	A0A0C7DIU5	50S ribosomal protein L13 OS=Mycobacterium bovis GN=rplM PE=3 SV=1	0	17.8711	24.6154	4	5	4	1	195	21.593	10.33	12.9204	4
FALSE	High	Master Protein	A0A0C7DMD8	Electron transfer flavoprotein subunit beta OS=Mycobacterium bovis GN=MBO1_02560 PE=4 SV=1	0	17.8472	36.7133	4	7	4	1	286	30.119	4.84	10.7933	4
FALSE	High	Master Protein	A0A0H3M3F9	Uncharacterized protein OS=Mycobacterium bovis (strain BCG / Pasteur 1173P2) GN=BCG_1292c PE=4 SV=1	0	17.7562	22.069	4	5	4	1	435	47.299	5.44	8.09635	4
FALSE	High	Master Protein	P65307	Putative phthiocerol dimycocerosate transporter LppX OS=Mycobacterium bovis (strain ATCC BAA-935 / AF2122/97) GN=lppX PE=3 SV=1	0	17.7545	27.897	4	5	4	1	233	24.125	5.22	13.7948	4
FALSE	High	Master Protein	A0A0H3MFM6	Diacylglycerol O-acyltransferase OS=Mycobacterium bovis (strain BCG / Pasteur 1173P2) GN=BCG_2502c PE=3 SV=1	0	17.7469	16.2933	5	7	5	1	491	52.334	7.55	12.5267	5
FALSE	High	Master Protein	P63569	Acetylornithine aminotransferase OS=Mycobacterium bovis (strain ATCC BAA-935 / AF2122/97) GN=argD PE=3 SV=1	0	17.5945	19.5	5	7	5	1	400	40.884	6.52	12.7599	5
FALSE	High	Master Protein	P65486	Probable methylmalonyl-CoA mutase small subunit OS=Mycobacterium bovis (strain ATCC BAA-935 / AF2122/97) GN=mutA PE=3 SV=1	0	17.5223	9.26829	4	5	4	1	615	64.705	5.53	11.6452	4
FALSE	High	Master Protein	A0A120IPA8	Laccase domain protein OS=Mycobacterium bovis BCG GN=RN06_2637 PE=3 SV=1	0	17.4142	36.3296	5	6	5	1	267	27.657	6.68	13.4015	5
FALSE	High	Master Protein	A0A0H3MD48	Probable methyltransferase OS=Mycobacterium bovis (strain BCG / Pasteur 1173P2) GN=BCG_1575 PE=4 SV=1	0	17.4086	15.2738	3	4	3	1	347	37.891	8.12	6.76966	3
FALSE	High	Master Protein	A0A0K2HU45	Uncharacterized protein OS=Mycobacterium bovis BCG GN=RN06_1401 PE=4 SV=1	0	17.3408	23.1884	2	3	2	1	69	7.603	10.76	11.2541	2
FALSE	High	Master Protein	A0A0H3P331	PROBABLE BETA-KETOACYL CoA THIOLASE FADA3 OS=Mycobacterium bovis (strain ATCC BAA-935 / AF2122/97) GN=fadA3 PE=3 SV=1	0	17.3056	20.7407	6	6	6	1	405	42.628	5.05	13.6025	6
FALSE	High	Master Protein	A0A0C7DGF8	Non-homologous end joining protein Ku OS=Mycobacterium bovis GN=ku PE=3 SV=1	0	17.2028	29.8969	6	7	6	1	291	33.004	5.02	14.2501	6
FALSE	High	Master Protein	A0A0C7DA27	Porphobilinogen deaminase OS=Mycobacterium bovis GN=hemC PE=3 SV=1	0	17.1862	31.0897	5	5	5	1	312	32.226	5.03	14.1307	5
FALSE	High	Master Protein	P65488	Probable methylmalonyl-CoA mutase large subunit OS=Mycobacterium bovis (strain ATCC BAA-935 / AF2122/97) GN=mutB PE=3 SV=1	0	17.153	16.9333	8	8	8	1	750	80.554	5.86	9.1558	8
FALSE	High	Master Protein	A0A0H3M1M6	Probable acyl-CoA dehydrogenase fadE3 OS=Mycobacterium bovis (strain BCG / Pasteur 1173P2) GN=fadE3 PE=3 SV=1	0	17.1068	26.2887	5	5	5	1	388	41.937	5.73	12.9598	5
FALSE	High	Master Protein	A0A0C7DGK7	Bifunctional protein FolD OS=Mycobacterium bovis GN=folD PE=3 SV=1	0	17.0831	40	6	7	6	1	305	32.037	6.86	6.30425	6
FALSE	High	Master Protein	P63976	DNA polymerase III subunit gamma/tau OS=Mycobacterium bovis (strain ATCC BAA-935 / AF2122/97) GN=dnaX PE=3 SV=1	0	17.0529	21.9723	7	8	7	1	578	61.885	5.88	14.9555	7
FALSE	High	Master Protein	P66947	Probable acetolactate synthase OS=Mycobacterium bovis (strain ATCC BAA-935 / AF2122/97) GN=ilvG PE=3 SV=1	0	17.0499	20.1097	6	6	6	1	547	57.484	5.9	8.06473	6
FALSE	High	Master Protein	A0A109S7F2	Uncharacterized protein OS=Mycobacterium bovis BCG GN=RN06_1906 PE=4 SV=1	0	17.0368	20.979	2	3	2	1	143	15.315	6.8	9.46953	2
FALSE	High	Master Protein	A0A0M3TNT1	Acetyl-CoA acetyltransferase OS=Mycobacterium bovis GN=BOVR_07040 PE=4 SV=1	0	16.9681	30.0254	6	6	6	1	393	40.444	5.08	14.2305	6
FALSE	High	Master Protein	P0A617	Thioredoxin OS=Mycobacterium bovis (strain ATCC BAA-935 / AF2122/97) GN=trxA PE=3 SV=2	0	16.9194	65.5172	4	6	4	1	116	12.537	5.22	10.2498	4
FALSE	High	Master Protein	A0A083WMK1	Conserved protein OS=Mycobacterium bovis GN=BOVR_01010 PE=4 SV=1	0	16.858	46.875	3	3	3	1	96	10.358	8.53	9.35319	3
FALSE	High	Master Protein	A0A0H3M5A8	Bifunctional apolipoprotein N-acyltransferase/polyprenol monophosphomannose synthase OS=Mycobacterium bovis (strain BCG / Pasteur 1173P2) GN=lnt PE=1 SV=1	0	16.8105	10.4119	5	5	5	1	874	93.766	8.13	10.544	5
FALSE	High	Master Protein	A0A0H3M379	Uncharacterized protein OS=Mycobacterium bovis (strain BCG / Pasteur 1173P2) GN=BCG_1169c PE=4 SV=1	0	16.8021	36.7925	5	5	5	1	212	22.973	5.97	13.0171	5
FALSE	High	Master Protein	A0A093MBW1	Secretion protein EspD OS=Mycobacterium bovis GN=BOVR_18840 PE=4 SV=1	0	16.7933	38.4211	4	5	4	1	190	20.41	4.13	6.56344	4
FALSE	High	Master Protein	A0A0H3M2D0	Phosphoribosylformylglycinamidine synthase subunit PurQ OS=Mycobacterium bovis (strain BCG / Pasteur 1173P2) GN=purQ PE=3 SV=1	0	16.7492	25.8929	4	5	4	1	224	23.618	4.97	11.323	4
FALSE	High	Master Protein	A1KIM7	Triosephosphate isomerase OS=Mycobacterium bovis (strain BCG / Pasteur 1173P2) GN=tpiA PE=3 SV=1	0	16.6498	27.2031	4	4	4	1	261	27.374	5.92	11.6307	4
FALSE	High	Master Protein	P65473	UDP-N-acetylmuramate--L-alanine ligase OS=Mycobacterium bovis (strain ATCC BAA-935 / AF2122/97) GN=murC PE=3 SV=1	0	16.6476	10.3239	3	3	3	1	494	51.144	6.62	9.00706	3
FALSE	High	Master Protein	A0A0C7DLX1	Putative pterin-4-alpha-carbinolamine dehydratase OS=Mycobacterium bovis GN=MBO1_02233 PE=3 SV=1	0	16.5976	32.6733	4	6	4	1	101	11.237	6.37	11.3787	4
FALSE	High	Master Protein	A0A083WF59	Uncharacterized protein OS=Mycobacterium bovis GN=MBO1_02053 PE=4 SV=1	0	16.5895	30.3502	6	6	6	1	257	27.153	9.96	10.8825	6
FALSE	High	Master Protein	A0A093MAE1	N-acetylmuramoyl-L-alanine amidase OS=Mycobacterium bovis GN=MBO1_00892 PE=4 SV=1	0	16.57	23.7154	5	6	5	1	253	26.119	9.45	14.5244	5
FALSE	High	Master Protein	A0A0M4N286	Dihydrolipoamide acetyltransferase OS=Mycobacterium bovis GN=BOVR_11465 PE=4 SV=1	0	16.5384	25.1356	8	10	8	1	553	57.039	5.02	12.9069	8
FALSE	High	Master Protein	A0A0H3P1T3	MYCOLIC ACID SYNTHASE PCAA (CYCLOPROPANE SYNTHASE) OS=Mycobacterium bovis (strain ATCC BAA-935 / AF2122/97) GN=pcaA PE=4 SV=1	0	16.5097	34.1463	6	7	5	1	287	33.007	6.47	15.1047	6
FALSE	High	Master Protein	A0A0H3P7F8	Nadph:adrenodoxin oxidoreductase fpra (Nadph-ferredoxin reductase) OS=Mycobacterium bovis (strain ATCC BAA-935 / AF2122/97) GN=fprA PE=4 SV=1	0	16.5024	26.9737	7	7	7	1	456	49.326	5.68	13.9041	7
FALSE	High	Master Protein	C1AHR7	30S ribosomal protein S11 OS=Mycobacterium bovis (strain BCG / Tokyo 172 / ATCC 35737 / TMC 1019) GN=rpsK PE=3 SV=1	0	16.3689	20.8633	3	4	3	1	139	14.762	11.68	13.1204	3
FALSE	High	Master Protein	A0A083VUN3	Cholesterol oxidase OS=Mycobacterium bovis GN=BOVR_17855 PE=4 SV=1	0	16.2572	18.6851	5	6	5	1	578	62.984	9.31	11.5649	5
FALSE	High	Master Protein	A0A109S814	Universal stress protein OS=Mycobacterium bovis BCG GN=RN06_2446 PE=3 SV=1	0	16.2329	22.2552	4	5	4	1	337	36.182	7.61	12.6888	4
FALSE	High	Master Protein	A0A083W2C4	Branched-chain-amino-acid aminotransferase OS=Mycobacterium bovis GN=BOVR_11440 PE=3 SV=1	0	16.2156	17.663	5	6	5	1	368	39.583	5.91	12.2367	5
FALSE	High	Master Protein	A0A083W0T0	3-methyl-2-oxobutanoate dehydrogenase subunit alp ha (Branched-chain alpha-ketoacid dehydrogenas e E1 component subunit alpha) (BCKADH E1-alpha) OS=Mycobacterium bovis GN=BOVR_12960 PE=4 SV=1	0	16.1984	16.3488	5	6	5	1	367	40.59	5.29	11.3391	5
FALSE	High	Master Protein	A0A0K2HWJ1	Uncharacterized protein OS=Mycobacterium bovis BCG GN=RN06_2274 PE=4 SV=1	0	16.1711	9.60118	4	4	4	1	677	69.562	4.91	11.8336	4
FALSE	High	Master Protein	A0A0H3P508	PROBABLE FEIII-DICITRATE-BINDING PERIPLASMIC LIPOPROTEIN FECB OS=Mycobacterium bovis (strain ATCC BAA-935 / AF2122/97) GN=fecB PE=4 SV=1	0	16.1671	21.4485	3	4	3	1	359	36.888	5.48	10.7388	3
FALSE	High	Master Protein	A0A0D1Q307	Chromosomal replication initiator protein DnaA OS=Mycobacterium bovis GN=dnaA PE=3 SV=1	0	16.1499	16.3708	6	6	6	1	507	56.551	5.71	13.6054	6
FALSE	High	Master Protein	A0A0H3M949	N5-carboxyaminoimidazole ribonucleotide synthase OS=Mycobacterium bovis (strain BCG / Pasteur 1173P2) GN=purK PE=3 SV=1	0	16.1382	31.2354	7	7	7	1	429	45.667	5.97	6.36174	7
FALSE	High	Master Protein	A0A109S757	50S ribosomal protein L31 OS=Mycobacterium bovis BCG GN=rpmE PE=3 SV=1	0	16.1295	51.25	2	6	2	1	80	8.747	9.58	14.3468	2
FALSE	High	Master Protein	A0A0K2HV99	6,7-dimethyl-8-ribityllumazine synthase OS=Mycobacterium bovis BCG GN=ribH PE=3 SV=1	0	16.1074	64.375	6	6	6	1	160	16.361	5.49	12.1877	6
FALSE	High	Master Protein	A0A0K2HZG5	Membrane protein OS=Mycobacterium bovis BCG GN=RN06_3120 PE=4 SV=1	0	16.0999	19.9041	6	6	6	1	417	45.446	9.7	11.9776	6
FALSE	High	Master Protein	A0A0H3MIA2	Probable short-chain type dehydrogenase/reductase OS=Mycobacterium bovis (strain BCG / Pasteur 1173P2) GN=BCG_3566c PE=3 SV=1	0	16.0952	29.9685	5	5	5	1	317	32.733	5.16	12.5242	5
FALSE	High	Master Protein	A0A109S8M8	Ribonuclease E OS=Mycobacterium bovis BCG GN=RN06_2989 PE=4 SV=1	0	16.0719	11.3326	6	7	6	1	953	103.329	4.77	14.4345	6
FALSE	High	Master Protein	A1KHD9	Arginine deiminase OS=Mycobacterium bovis (strain BCG / Pasteur 1173P2) GN=arcA PE=3 SV=1	0	16.0313	26.8657	6	6	6	1	402	43.062	5.38	9.12529	6
FALSE	High	Master Protein	P0A551	DNA polymerase I OS=Mycobacterium bovis (strain ATCC BAA-935 / AF2122/97) GN=polA PE=3 SV=1	0	16.0199	8.18584	5	5	5	1	904	98.412	5.19	10.2674	5
FALSE	High	Master Protein	P64280	Transcription elongation factor GreA OS=Mycobacterium bovis (strain ATCC BAA-935 / AF2122/97) GN=greA PE=3 SV=1	0	15.9942	43.9024	4	5	4	1	164	17.844	5	11.5497	4
FALSE	High	Master Protein	A0A0H3MEW8	Probable Rieske iron-sulfur protein QcrA OS=Mycobacterium bovis (strain BCG / Pasteur 1173P2) GN=qcrA PE=4 SV=1	0	15.915	13.0536	4	4	4	1	429	46.875	6.15	5.6717	4
FALSE	High	Master Protein	A1KMX0	Uracil-DNA glycosylase OS=Mycobacterium bovis (strain BCG / Pasteur 1173P2) GN=ung PE=3 SV=1	0	15.8298	48.4581	5	6	5	1	227	24.466	9.01	9.47761	5
FALSE	High	Master Protein	A0A0C7DN95	3 beta-hydroxysteroid dehydrogenase/Delta 5-->4-i somerase (Cholesterol dehydrogenase) OS=Mycobacterium bovis GN=MBO_301529 PE=4 SV=1	0	15.8237	27.5676	5	7	5	1	370	40.686	7.01	18.749	5
FALSE	High	Master Protein	A0A083VZH4	Probable transcriptional regulatory protein BOVR_13525 OS=Mycobacterium bovis GN=BOVR_13525 PE=3 SV=1	0	15.7651	26.6932	3	3	3	1	251	26.782	4.77	9.98736	3
FALSE	High	Master Protein	A0A083VX07	Probable transcriptional regulatory protein (Tran scriptional regulator) OS=Mycobacterium bovis GN=BOVR_14920 PE=4 SV=1	0	15.7512	25	5	6	5	1	252	27.696	7.55	9.74731	5
FALSE	High	Master Protein	A0A0D1Q732	Protein translocase subunit SecD OS=Mycobacterium bovis GN=secD PE=3 SV=1	0	15.6802	10.9948	4	6	4	1	573	60.23	8.79	16.3464	4
FALSE	High	Master Protein	A0A0K2HUM7	Polyprenyl-diphosphate synthase GrcC OS=Mycobacterium bovis BCG GN=RN06_1236 PE=4 SV=1	0	15.6211	24.3077	4	4	4	1	325	34.722	5.4	6.35211	4
FALSE	High	Master Protein	A0A083VTZ3	30S ribosomal protein S13 OS=Mycobacterium bovis GN=rpsM PE=3 SV=1	0	15.5988	33.871	6	6	6	1	124	14.342	11.02	14.4121	6
FALSE	High	Master Protein	A1KGJ7	50S ribosomal protein L5 OS=Mycobacterium bovis (strain BCG / Pasteur 1173P2) GN=rplE PE=3 SV=1	0	15.5676	58.8235	7	8	7	1	187	21.006	10.1	7.75372	7
FALSE	High	Master Protein	A0A0K2HZN8	Acylphosphatase OS=Mycobacterium bovis BCG GN=RN06_3527 PE=3 SV=1	0	15.5456	61.2903	4	5	4	1	93	10.199	9.19	12.9009	4
FALSE	High	Master Protein	A0A0C7DE57	Conserved protein OS=Mycobacterium bovis GN=MBO1_01894 PE=4 SV=1	0	15.5065	24.5779	6	7	6	1	533	56.44	5.69	12.5874	6
FALSE	High	Master Protein	A0A0M4PA33	Uncharacterized protein OS=Mycobacterium bovis GN=BOVR_07655 PE=4 SV=1	0	15.4012	51.2987	5	6	5	1	154	17.589	11.25	9.17561	5
FALSE	High	Master Protein	A0A083WDP1	Threonylcarbamoyl-AMP synthase OS=Mycobacterium bovis GN=BOVR_06905 PE=4 SV=1	0	15.3221	34.5622	3	3	3	1	217	22.588	4.97	7.43425	3
FALSE	High	Master Protein	A0A0K2HV38	Uncharacterized protein OS=Mycobacterium bovis BCG GN=RN06_1767 PE=4 SV=1	0	15.1887	26.9091	4	4	4	1	275	29.893	7.06	8.92447	4
FALSE	High	Master Protein	A0A0K2HYM7	Haloalkane dehalogenase OS=Mycobacterium bovis BCG GN=dhaA PE=3 SV=1	0	15.1887	19.6667	3	4	3	1	300	33.679	5.14	9.47029	3
FALSE	High	Master Protein	A0A0C7DJL9	tRNA pseudouridine synthase A OS=Mycobacterium bovis GN=truA PE=3 SV=1	0	15.1885	18.1518	4	5	4	1	303	33.241	9.95	9.51739	4
FALSE	High	Master Protein	A0A0H3P6N4	Possible acyltransferase OS=Mycobacterium bovis (strain ATCC BAA-935 / AF2122/97) GN=Mb3846c PE=4 SV=1	0	15.186	29.3436	6	6	6	1	259	28.436	10.02	11.7831	6
FALSE	High	Master Protein	A0A0H3MFC9	Uncharacterized protein OS=Mycobacterium bovis (strain BCG / Pasteur 1173P2) GN=BCG_3736c PE=4 SV=1	0	15.1774	29.1391	2	4	2	1	151	15.236	5.2	11.9909	2
FALSE	High	Master Protein	A0A083VWV9	Ribosome-binding factor A OS=Mycobacterium bovis GN=rbfA PE=3 SV=1	0	15.1695	54.6448	4	6	4	1	183	18.987	5.67	13.6403	4
FALSE	High	Master Protein	A0A0H3P6R6	Probable nadh-dependent glutamate synthase (Small subunit) gltd (L-glutamate synthase) (L-glutamate synthetase) (Nadh-glutamate synthase) (Glutamate synthase (Nadh)) (Glts beta chain) (Nadph-gogat) OS=Mycobacterium bovis (strain ATCC BAA-935 / AF2122/97) GN=gltD PE=4 SV=1	0	15.0982	25	6	6	6	1	488	53.399	5.78	12.9943	6
FALSE	High	Master Protein	A0A0H3MFF9	Probable sulfate-binding lipoprotein subI OS=Mycobacterium bovis (strain BCG / Pasteur 1173P2) GN=subI PE=4 SV=1	0	15.0838	19.6629	4	4	4	1	356	37.395	6.8	4.36539	4
FALSE	High	Master Protein	A0A0H3M443	Probable 6-phosphogluconate dehydrogenase, decarboxylating gnd2 OS=Mycobacterium bovis (strain BCG / Pasteur 1173P2) GN=gnd2 PE=4 SV=1	0	15.0798	12.6471	3	4	3	1	340	36.335	5.44	11.9481	3
FALSE	High	Master Protein	A0A109S8N0	2-oxoglutarate oxidoreductase subunit KorB OS=Mycobacterium bovis BCG GN=RN06_2997 PE=4 SV=1	0	15.0572	20.9302	4	5	4	1	430	46.088	6.4	8.08731	4
FALSE	High	Master Protein	A0A0C7DEZ2	Prokaryotic ubiquitin-like protein Pup OS=Mycobacterium bovis GN=pup PE=3 SV=1	0	15.0492	30.9859	3	3	3	1	71	7.755	4.32	9.81006	3
FALSE	High	Master Protein	A0A083W5Y8	ESX-5 secretion system protein EccA5 (ESX conserv ed component A5) (Type VII secretion system protein EccA5) (T7SS protein EccA5) OS=Mycobacterium bovis GN=MBO1_03755 PE=4 SV=1	0	14.9634	20.1639	7	8	7	1	610	67.714	5.48	9.52707	7
FALSE	High	Master Protein	A0A0H3M4P0	Uncharacterized protein OS=Mycobacterium bovis (strain BCG / Pasteur 1173P2) GN=BCG_1803c PE=3 SV=1	0	14.958	32.0611	5	7	5	1	262	28.736	6.86	12.7821	5
FALSE	High	Master Protein	A0A083WCJ4	Oxidoreductase OS=Mycobacterium bovis GN=BOVR_07680 PE=4 SV=1	0	14.9443	36.9637	6	6	6	1	303	32.638	5.26	10.3919	6
FALSE	High	Master Protein	A0A0C7DGH8	D-alanine--D-alanine ligase OS=Mycobacterium bovis GN=ddl PE=3 SV=1	0	14.9293	42.0912	8	9	8	1	373	39.656	5.5	13.3957	8
FALSE	High	Master Protein	A0A0C7DPT1	Uncharacterized protein OS=Mycobacterium bovis GN=MBO1_01721 PE=4 SV=1	0	14.8958	34.0206	2	3	2	1	97	10.267	10.59	9.74953	2
FALSE	High	Master Protein	A0A083VT79	dTDP-glucose 4,6-dehydratase OS=Mycobacterium bovis GN=BOVR_18105 PE=3 SV=1	0	14.8946	27.7946	6	6	6	1	331	37.535	5.66	9.04386	6
FALSE	High	Master Protein	A0A083VW64	NrdH-redoxin OS=Mycobacterium bovis GN=BOVR_16570 PE=4 SV=1	0	14.848	35.7143	2	3	2	1	84	8.958	7.99	12.4348	2
FALSE	High	Master Protein	A0A0C7DEP1	Enoyl-CoA hydratase echA15 OS=Mycobacterium bovis GN=MBO1_01328 PE=3 SV=1	0	14.8423	18.0124	3	5	3	1	322	34.639	6.68	10.124	3
FALSE	High	Master Protein	A0A0C7DT76	20-beta-hydroxysteroid dehydrogenase fabG3 (EC 1. 1.1.53) OS=Mycobacterium bovis GN=MBO1_01060 PE=4 SV=1	0	14.8376	24.1007	4	6	4	1	278	28.997	5.19	15.0109	4
FALSE	High	Master Protein	A0A0H4G0M1	DNA polymerase III subunit beta OS=Mycobacterium bovis BCG GN=RN06_0002 PE=4 SV=1	0	14.8317	15.6716	5	6	5	1	402	42.029	4.93	8.49969	5
FALSE	High	Master Protein	A0A0K2HTT9	Methionine aminopeptidase OS=Mycobacterium bovis BCG GN=map PE=3 SV=1	0	14.8167	27.0677	4	5	4	1	266	27.26	5.76	13.0788	4
FALSE	High	Master Protein	A0A0H3P1X5	DNA gyrase subunit A OS=Mycobacterium bovis (strain ATCC BAA-935 / AF2122/97) GN=gyrA PE=3 SV=1	0	14.7636	7.75656	5	5	5	1	838	92.245	5.69	11.8081	5
FALSE	High	Master Protein	A0A083W6R1	Uncharacterized protein OS=Mycobacterium bovis GN=MBO1_03470 PE=4 SV=1	0	14.7605	28.2051	3	3	3	1	234	25.861	9.1	8.24372	3
FALSE	High	Master Protein	A0A0H3MCM6	Glutamine-dependent NAD(+) synthetase nadE OS=Mycobacterium bovis (strain BCG / Pasteur 1173P2) GN=nadE PE=4 SV=1	0	14.7176	9.42563	4	4	4	1	679	74.636	5.73	6.43789	4
FALSE	High	Master Protein	A0A0H3M2K8	Probable serine protease pepA OS=Mycobacterium bovis (strain BCG / Pasteur 1173P2) GN=pepA PE=4 SV=1	0	14.7174	12.3944	2	3	2	1	355	34.905	5.33	10.4509	2
FALSE	High	Master Protein	A0A0H3M356	Possible enoyl-CoA hydratase echA9 OS=Mycobacterium bovis (strain BCG / Pasteur 1173P2) GN=echA9 PE=4 SV=1	0	14.7085	20.5797	4	5	4	1	345	36.332	5.1	10.4303	4
FALSE	High	Master Protein	A0A0C7DBA8	Secreted fibronectin-binding protein antigen prot ein fbpD OS=Mycobacterium bovis GN=MBO1_00655 PE=4 SV=1	0	14.6994	38.3871	5	8	5	1	310	32.182	6.68	11.4663	5
FALSE	High	Master Protein	A0A0C7DFC9	Sulfurtransferase OS=Mycobacterium bovis GN=BOVR_11865 PE=4 SV=1	0	14.6645	30.2817	4	5	4	1	284	29.324	5.55	14.788	4
FALSE	High	Master Protein	Q7TWB7	Long-chain-fatty-acid--CoA/3-oxocholest-4-en-26-oate--CoA ligase OS=Mycobacterium bovis (strain ATCC BAA-935 / AF2122/97) GN=fadD19 PE=3 SV=1	0	14.6637	14.781	4	6	4	1	548	59.703	5.67	9.02936	4
FALSE	High	Master Protein	A0A083WIB4	Adenylosuccinate lyase OS=Mycobacterium bovis GN=BOVR_04110 PE=3 SV=1	0	14.6292	17.3729	4	4	4	1	472	51.004	6.38	9.99817	4
FALSE	High	Master Protein	A0A0H3P448	Conserved transmembrane protein OS=Mycobacterium bovis (strain ATCC BAA-935 / AF2122/97) GN=Mb2063c PE=4 SV=1	0	14.6155	29.6296	5	5	5	1	324	34.727	5.38	8.06057	5
FALSE	High	Master Protein	A0A0H3MHR2	Uncharacterized protein OS=Mycobacterium bovis (strain BCG / Pasteur 1173P2) GN=BCG_3408 PE=4 SV=1	0	14.5769	39.0572	6	6	6	1	297	31.756	7.03	6.573	6
FALSE	High	Master Protein	A0A0H3MHM7	Uncharacterized protein OS=Mycobacterium bovis (strain BCG / Pasteur 1173P2) GN=BCG_3376 PE=4 SV=1	0	14.5235	15	4	8	4	1	420	45.704	4.3	12.1565	4
FALSE	High	Master Protein	A0A0H3P4Z8	Conserved protein ssec2 OS=Mycobacterium bovis (strain ATCC BAA-935 / AF2122/97) GN=sseC2 PE=4 SV=1	0	14.5217	73	4	4	4	1	100	10.159	4.61	8.39744	4
FALSE	High	Master Protein	A0A0H3P3U5	Possible transcriptional regulatory protein OS=Mycobacterium bovis (strain ATCC BAA-935 / AF2122/97) GN=Mb2282c PE=4 SV=1	0	14.5117	20.6799	4	4	4	1	353	37.49	4.74	9.28664	4
FALSE	High	Master Protein	P67488	Putative pre-16S rRNA nuclease OS=Mycobacterium bovis (strain ATCC BAA-935 / AF2122/97) GN=Mb2584c PE=3 SV=1	0	14.4919	50.5882	5	5	5	1	170	18.055	8.28	8.2032	5
FALSE	High	Master Protein	A0A0D1MJJ6	Translation initiation factor IF-2 OS=Mycobacterium bovis GN=infB PE=3 SV=1	0	14.4481	14.4444	6	7	6	1	900	93.984	6.37	11.5154	6
FALSE	High	Master Protein	A0A0H3P5U3	Nad(P)h quinone reductase lpda OS=Mycobacterium bovis (strain ATCC BAA-935 / AF2122/97) GN=lpdA PE=4 SV=1	0	14.4376	15.2866	3	5	3	1	471	49.133	6.42	11.7046	3
FALSE	High	Master Protein	A0A0K2HTH2	Uncharacterized protein OS=Mycobacterium bovis BCG GN=RN06_1153 PE=4 SV=1	0	14.3649	26.5363	5	6	5	1	358	37.727	4.78	7.82111	5
FALSE	High	Master Protein	A0A0H3M2F1	Possible udp-glucose 4-epimerase galE2 OS=Mycobacterium bovis (strain BCG / Pasteur 1173P2) GN=galE2 PE=4 SV=1	0	14.3463	15.1596	4	4	4	1	376	41.038	10.37	9.50108	4
FALSE	High	Master Protein	A0A0H3MDL1	Probable transcriptional regulatory protein OS=Mycobacterium bovis (strain BCG / Pasteur 1173P2) GN=BCG_2908 PE=4 SV=1	0	14.3454	53.2374	4	6	4	1	139	14.681	10.49	9.78655	4
FALSE	High	Master Protein	A0A0C7DDJ8	Uncharacterized protein OS=Mycobacterium bovis GN=MBO1_00873 PE=4 SV=1	0	14.3339	16.9492	2	3	2	1	236	25.241	4.87	11.0968	2
FALSE	High	Master Protein	A0A083VYB1	Hydrolase OS=Mycobacterium bovis GN=BOVR_15935 PE=4 SV=1	0	14.297	9.45274	4	4	4	1	603	66.799	6.65	8.39977	4
FALSE	High	Master Protein	A0A083W761	Proteasome-associated ATPase OS=Mycobacterium bovis GN=mpa PE=3 SV=1	0	14.2433	19.2118	6	6	6	1	609	67.36	5.01	14.8901	6
FALSE	High	Master Protein	A0A0C7DPF8	Uncharacterized protein Rv2715/MT2788 OS=Mycobacterium bovis GN=MBO_302081 PE=4 SV=1	0	14.2226	16.7155	4	5	4	1	341	36.908	9.07	8.9468	4
FALSE	High	Master Protein	A0A0Y1BEF2	S-adenosyl-L-methionine-dependent methyltransferase OS=Mycobacterium bovis BCG GN=RN06_0182 PE=3 SV=1	0	14.1845	20.0599	4	5	3	1	334	36.86	7.46	7.4544	4
FALSE	High	Master Protein	A0A0Y1D3P5	Glycine--tRNA ligase OS=Mycobacterium bovis BCG GN=glyQS PE=3 SV=1	0	14.1675	23.3471	6	7	6	1	484	55.054	6.4	12.9851	6
FALSE	High	Master Protein	A1KLT2	Adenine phosphoribosyltransferase OS=Mycobacterium bovis (strain BCG / Pasteur 1173P2) GN=apt PE=3 SV=1	0	14.1575	16.1435	3	4	3	1	223	23.232	9.47	9.58035	3
FALSE	High	Master Protein	P64876	Putative F420H(2)-dependent quinone reductase Mb1584 OS=Mycobacterium bovis (strain ATCC BAA-935 / AF2122/97) GN=Mb1584 PE=3 SV=1	0	14.1488	45.2703	4	4	4	1	148	16.337	8.34	10.0744	4
FALSE	High	Master Protein	A0A0H3P444	POSSIBLE BETA-1,3-GLUCANASE OS=Mycobacterium bovis (strain ATCC BAA-935 / AF2122/97) GN=Mb0323 PE=4 SV=1	0	14.1408	14.2857	4	6	4	1	294	32.138	5.01	15.9494	4
FALSE	High	Master Protein	A0A0H3M950	Phosphate-binding protein PstS1 OS=Mycobacterium bovis (strain BCG / Pasteur 1173P2) GN=pstS1 PE=1 SV=1	0	14.0674	24.5989	5	5	5	1	374	38.191	5.38	9.5968	5
FALSE	High	Master Protein	A1KJ21	Imidazole glycerol phosphate synthase subunit HisF OS=Mycobacterium bovis (strain BCG / Pasteur 1173P2) GN=hisF PE=3 SV=1	0	14.0655	20.2247	5	6	5	1	267	27.22	4.89	12.99	5
FALSE	High	Master Protein	A0A083WA03	Alpha-1,4 glucan phosphorylase OS=Mycobacterium bovis GN=BOVR_07065 PE=3 SV=1	0	14.0627	8.22711	4	4	4	1	863	95.462	5.44	11.1882	4
FALSE	High	Master Protein	A0A0K2HSP2	Probable endonuclease 4 OS=Mycobacterium bovis BCG GN=nfo PE=3 SV=1	0	13.9638	40.4762	4	4	4	1	252	26.829	5.64	6.39507	4
FALSE	High	Master Protein	A0A0H3P1U0	PROBABLE UROPORPHYRIN-III C-METHYLTRANSFERASE HEMD (UROPORPHYRINOGEN III METHYLASE) (UROGEN III METHYLASE) (SUMT) (UROGEN III METHYLASE) (UROM) OS=Mycobacterium bovis (strain ATCC BAA-935 / AF2122/97) GN=hemD PE=4 SV=1	0	13.9534	10.9735	3	4	3	1	565	58.8	5.8	11.6896	3
FALSE	High	Master Protein	A0A0H3MAU5	UPF0336 protein BCG_0684 OS=Mycobacterium bovis (strain BCG / Pasteur 1173P2) GN=BCG_0684 PE=3 SV=1	0	13.9422	34.8101	4	5	4	1	158	17.47	4.63	7.40287	4
FALSE	High	Master Protein	P0A643	Uncharacterized NTE family protein Mb2594 OS=Mycobacterium bovis (strain ATCC BAA-935 / AF2122/97) GN=Mb2594 PE=3 SV=1	0	13.9295	17.6672	5	6	5	1	583	62.085	6.32	6.34646	5
FALSE	High	Master Protein	A0A0H3P5K4	PROBABLE NADPH QUINONE OXIDOREDUCTASE FADB4 (NADPH:QUINONE REDUCTASE) (ZETA-CRYSTALLIN) OS=Mycobacterium bovis (strain ATCC BAA-935 / AF2122/97) GN=fadB4 PE=4 SV=1	0	13.8676	13.0031	3	5	3	1	323	33.832	5.57	5.80664	3
FALSE	High	Master Protein	A0A0H3M1M2	Probable transcriptional regulatory protein OS=Mycobacterium bovis (strain BCG / Pasteur 1173P2) GN=BCG_0505c PE=4 SV=1	0	13.7149	18.7764	4	5	4	1	474	53.093	7.12	8.17321	4
FALSE	High	Master Protein	O69443	Divalent metal cation transporter MntH OS=Mycobacterium bovis (strain ATCC BAA-935 / AF2122/97) GN=mntH PE=3 SV=2	0	13.7119	4.67836	2	4	2	1	684	72.787	9.13	8.09258	2
FALSE	High	Master Protein	A0A083WKE5	Class II fructose-bisphosphate aldolase OS=Mycobacterium bovis GN=BOVR_01895 PE=3 SV=1	0	13.7063	21.5116	3	4	3	1	344	36.522	5.78	7.23626	3
FALSE	High	Master Protein	A0A0C7DN81	Uncharacterized protein Rv1339/MT1380 OS=Mycobacterium bovis GN=MBO1_02456 PE=4 SV=1	0	13.6851	22.3443	3	3	3	1	273	29.136	6.28	8.53818	3
FALSE	High	Master Protein	A1KJE8	Putative succinate-semialdehyde dehydrogenase [NADP(+)] 2 OS=Mycobacterium bovis (strain BCG / Pasteur 1173P2) GN=gabD2 PE=3 SV=1	0	13.6683	17.7606	5	7	5	1	518	55.29	7.85	13.1801	5
FALSE	High	Master Protein	A1KGI7	50S ribosomal protein L22 OS=Mycobacterium bovis (strain BCG / Pasteur 1173P2) GN=rplV PE=3 SV=1	0	13.6059	37.5635	4	6	4	1	197	20.368	11.74	13.3008	4
FALSE	High	Master Protein	A0A0H3M5J7	UDP-N-acetylmuramoyl-L-alanyl-D-glutamate--2,6-diaminopimelate ligase OS=Mycobacterium bovis (strain BCG / Pasteur 1173P2) GN=murE PE=3 SV=1	0	13.5424	22.4299	5	5	5	1	535	55.307	6.77	7.34597	5
FALSE	High	Master Protein	A0A0C7DB35	Cold-shock protein OS=Mycobacterium bovis GN=MBO1_00821 PE=4 SV=1	0	13.4932	57.1429	3	5	3	1	91	10.046	9.47	15.9613	3
FALSE	High	Master Protein	A0A0C7DCF9	Thiol peroxidase OS=Mycobacterium bovis GN=MBO1_01087 PE=3 SV=1	0	13.4432	18.7898	3	4	3	1	314	32.686	7.85	11.4678	3
FALSE	High	Master Protein	A0A0H3M466	50S ribosomal protein L7/L12 OS=Mycobacterium bovis (strain BCG / Pasteur 1173P2) GN=rplL PE=3 SV=1	0	13.4254	27.6923	4	5	4	1	130	13.432	4.65	8.96244	4
FALSE	High	Master Protein	A0A0C7DP76	ABC transporter, ATP-binding protein (Probable co nserved ATP-binding protein ABC transporter) OS=Mycobacterium bovis GN=BOVR_15745 PE=4 SV=1	0	13.4141	27.5261	4	4	4	1	287	31.23	5.86	10.4757	4
FALSE	High	Master Protein	A1KF76	Cobyric acid synthase OS=Mycobacterium bovis (strain BCG / Pasteur 1173P2) GN=cobQ PE=3 SV=1	0	13.3909	13.9676	4	5	4	1	494	52.102	6.35	9.53834	4
FALSE	High	Master Protein	A1KNE4	NADH-quinone oxidoreductase subunit D OS=Mycobacterium bovis (strain BCG / Pasteur 1173P2) GN=nuoD PE=3 SV=1	0	13.3292	24.7727	5	7	5	1	440	48.133	5.71	12.7378	5
FALSE	High	Master Protein	A0A0H3M9Y6	Putative transcription factor OS=Mycobacterium bovis (strain BCG / Pasteur 1173P2) GN=BCG_3648c PE=4 SV=1	0	13.3137	29.0123	3	4	3	1	162	17.896	5.67	5.59528	3
FALSE	High	Master Protein	A0A083W7T5	Acyl-CoA dehydrogenase OS=Mycobacterium bovis GN=BOVR_08730 PE=3 SV=1	0	13.2519	13.941	3	4	1	1	373	37.852	5.25	7.15061	3
FALSE	High	Master Protein	A0A0H3P8Z7	Deazaflavin-dependent nitroreductase ddn OS=Mycobacterium bovis (strain ATCC BAA-935 / AF2122/97) GN=ddn PE=4 SV=1	0	13.2264	25.1656	5	5	5	1	151	17.36	9.5	5.09768	5
FALSE	High	Master Protein	A0A0M4P739	Heat-inducible transcription repressor HrcA OS=Mycobacterium bovis GN=hrcA PE=3 SV=1	0	13.1873	28.5714	5	5	5	1	343	36.464	5.44	9.17897	5
FALSE	High	Master Protein	A0A0K2HWF8	Uncharacterized protein OS=Mycobacterium bovis BCG GN=RN06_2321 PE=4 SV=1	0	13.1799	31.6239	4	5	4	1	234	25.555	4.94	7.73621	4
FALSE	High	Master Protein	A0A0C7DAW4	Uncharacterized protein OS=Mycobacterium bovis GN=MBO1_00704 PE=4 SV=1	0	13.1391	33.4728	6	6	6	1	239	26.247	9.5	14.1938	6
FALSE	High	Master Protein	C1AGB0	3-isopropylmalate dehydrogenase OS=Mycobacterium bovis (strain BCG / Tokyo 172 / ATCC 35737 / TMC 1019) GN=leuB PE=3 SV=1	0	13.0982	23.5119	5	5	5	1	336	35.25	5.74	12.2855	5
FALSE	High	Master Protein	A0A083W0Z6	AAA family ATPase OS=Mycobacterium bovis GN=BOVR_13305 PE=4 SV=1	0	13.0716	14.3805	4	5	4	1	452	47.528	6.55	7.026	4
FALSE	High	Master Protein	A0A0H4XXF5	Pyridoxal 5'-phosphate synthase subunit PdxT OS=Mycobacterium bovis GN=pdxT PE=3 SV=1	0	13.0668	32.3232	3	3	3	1	198	21.059	5.58	7.4051	3
FALSE	High	Master Protein	A0A0V7XKI6	O-succinylbenzoic acid--CoA ligase OS=Mycobacterium bovis GN=BOVR_02835 PE=4 SV=1	0	13.052	19.4595	3	3	3	1	370	37.487	6.04	6.65602	3
FALSE	High	Master Protein	A0A0H3P570	Probable short-chain type dehydrogenase/reductase OS=Mycobacterium bovis (strain ATCC BAA-935 / AF2122/97) GN=Mb0970 PE=3 SV=1	0	12.975	30.4348	5	6	5	1	253	27.023	9.77	7.15396	5
FALSE	High	Master Protein	A0A0H3P7V7	Probable serine protease pepd (Serine proteinase) (Mtb32b) OS=Mycobacterium bovis (strain ATCC BAA-935 / AF2122/97) GN=pepd PE=4 SV=1	0	12.891	15.9483	5	5	5	1	464	46.408	6.38	11.0677	5
FALSE	High	Master Protein	A0A0C7DEN5	Uncharacterized protein OS=Mycobacterium bovis GN=MBO1_01938 PE=4 SV=1	0	12.8734	25.523	4	5	4	1	239	26.306	9	9.91735	4
FALSE	High	Master Protein	A0A0H3M737	Iron-dependent repressor and activator ideR OS=Mycobacterium bovis (strain BCG / Pasteur 1173P2) GN=ideR PE=4 SV=1	0	12.8434	19.5652	3	4	3	1	230	25.217	5.36	8.05077	3
FALSE	High	Master Protein	A0A0H3MDY3	Virulence-regulating transcriptional regulator virS (AraC/xylS family) OS=Mycobacterium bovis (strain BCG / Pasteur 1173P2) GN=virS PE=4 SV=1	0	12.7824	27.6471	5	5	5	1	340	37.712	8.72	5.14517	5
FALSE	High	Master Protein	A0A0K2HUX2	Membrane protein OS=Mycobacterium bovis BCG GN=RN06_1696 PE=4 SV=1	0	12.7581	24.0909	2	2	2	1	220	23.447	4.75	9.0866	2
FALSE	High	Master Protein	A0A083WI08	30S ribosomal protein S10 OS=Mycobacterium bovis GN=rpsJ PE=3 SV=1	0	12.7197	21.7822	3	3	3	1	101	11.424	9.38	6.27027	3
FALSE	High	Master Protein	C1ALD8	Phosphoribosylformylglycinamidine synthase subunit PurL OS=Mycobacterium bovis (strain BCG / Tokyo 172 / ATCC 35737 / TMC 1019) GN=purL PE=3 SV=2	0	12.7165	6.00522	3	4	3	1	766	80.751	5	9.6989	3
FALSE	High	Master Protein	A0A0H3P5N3	TWO COMPONENT TRANSCRIPTIONAL REGULATORY PROTEIN DEVR (PROBABLY LUXR/UHPA-FAMILY) OS=Mycobacterium bovis (strain ATCC BAA-935 / AF2122/97) GN=devR PE=4 SV=1	0	12.7158	18.894	3	3	3	1	217	23.279	5.82	7.84296	3
FALSE	High	Master Protein	A0A0H3P4H5	Conserved protein OS=Mycobacterium bovis (strain ATCC BAA-935 / AF2122/97) GN=Mb2695c PE=4 SV=1	0	12.7047	22.9437	3	4	3	1	231	26.233	5.86	10.5419	3
FALSE	High	Master Protein	A0A0C7DNT9	Bifunctional protein GlmU OS=Mycobacterium bovis GN=glmU PE=3 SV=1	0	12.6609	16.3636	4	5	4	1	495	51.553	6.06	10.0817	4
FALSE	High	Master Protein	A0A083WIV8	Uncharacterized protein OS=Mycobacterium bovis GN=BOVR_02590 PE=4 SV=1	0	12.6476	13.6628	3	5	3	1	344	36.527	6.6	5.30476	3
FALSE	High	Master Protein	A0A083WA50	Bifunctional protein PyrR OS=Mycobacterium bovis GN=pyrR PE=3 SV=1	0	12.6408	21.7617	4	4	4	1	193	20.614	7.69	10.9238	4
FALSE	High	Master Protein	A0A0H3M1X0	Probable conserved lipoprotein lpqN OS=Mycobacterium bovis (strain BCG / Pasteur 1173P2) GN=lpqN PE=4 SV=1	0	12.5075	32.0175	3	5	3	1	228	23.668	4.82	6.95863	3
FALSE	High	Master Protein	A0A0H3MAW3	Possible arylsulfatase atsD OS=Mycobacterium bovis (strain BCG / Pasteur 1173P2) GN=atsD PE=4 SV=1	0	12.4941	13.4689	6	6	6	1	787	86.015	5.52	6.14223	6
FALSE	High	Master Protein	A0A0Y1BT88	Delta-aminolevulinic acid dehydratase OS=Mycobacterium bovis BCG GN=RN06_0632 PE=3 SV=1	0	12.4397	24.6201	4	6	4	1	329	34.778	4.98	4.43849	4
FALSE	High	Master Protein	A1KMX8	Polyphosphate kinase OS=Mycobacterium bovis (strain BCG / Pasteur 1173P2) GN=ppk PE=3 SV=1	0	12.4198	13.3423	6	6	6	1	742	82.988	5.77	6.87105	6
FALSE	High	Master Protein	A0A0H3MCB3	Dihydropteroate synthase OS=Mycobacterium bovis (strain BCG / Pasteur 1173P2) GN=folP2 PE=3 SV=1	0	12.4076	24.2138	3	3	3	1	318	33.025	7.23	7.99285	3
FALSE	High	Master Protein	A0A0C7DP30	Glucosyl-3-phosphoglycerate phosphatase (GpgP) (E C (Mannosyl-3-phosphoglycerate phosphatase) (MpgP)) OS=Mycobacterium bovis GN=BOVR_12530 PE=3 SV=1	0	12.3927	22.87	3	3	3	1	223	24.159	6.55	8.90712	3
FALSE	High	Master Protein	A0A0H3M5H1	Putative initiation inhibitor protein OS=Mycobacterium bovis (strain BCG / Pasteur 1173P2) GN=BCG_1747 PE=4 SV=1	0	12.3907	14.4654	4	4	4	1	318	34.389	6.44	10.6536	4
FALSE	High	Master Protein	A0A0C7DDF6	ESX-1 secretion-associated protein EspA OS=Mycobacterium bovis GN=MBO1_00797 PE=4 SV=1	0	12.2423	6.88776	2	2	2	1	392	39.876	5.36	6.58361	2
FALSE	High	Master Protein	A0A0K2HYU0	Uncharacterized protein OS=Mycobacterium bovis BCG GN=RN06_3213 PE=4 SV=1	0	12.2236	52.6882	2	3	2	1	93	10.077	5.16	8.85276	2
FALSE	High	Master Protein	C1AL57	50S ribosomal protein L15 OS=Mycobacterium bovis (strain BCG / Tokyo 172 / ATCC 35737 / TMC 1019) GN=rplO PE=3 SV=1	0	12.1607	30.137	3	3	3	1	146	15.511	11.34	7.68994	3
FALSE	High	Master Protein	A0A0H3P4Y7	Conserved alanine and arginine rich protein OS=Mycobacterium bovis (strain ATCC BAA-935 / AF2122/97) GN=Mb2750 PE=4 SV=1	0	12.1178	12.6667	4	4	4	1	450	49.766	6.6	6.99374	4
FALSE	High	Master Protein	A0A0M4NGN2	Short-chain dehydrogenase OS=Mycobacterium bovis GN=BOVR_18195 PE=4 SV=1	0	12.1147	23.1884	4	6	4	1	276	28.994	6.43	9.86048	4
FALSE	High	Master Protein	A0A083VVJ4	Acyl-CoA dehydrogenase (Probable acyl-CoA dehydro genase FadE24) OS=Mycobacterium bovis GN=BOVR_16250 PE=3 SV=1	0	12.1132	17.3077	4	5	4	1	468	49.616	6.06	5.45484	4
FALSE	High	Master Protein	A0A0C7DQS4	4-hydroxy-tetrahydrodipicolinate reductase OS=Mycobacterium bovis GN=dapB PE=3 SV=1	0	12.0629	31.8548	5	5	5	1	248	26.06	6.05	7.82544	5
FALSE	High	Master Protein	A0A0C7DA24	Putative DNA-binding protein Rv0500A/MT0521 OS=Mycobacterium bovis GN=MBO1_00150 PE=4 SV=1	0	12.0124	35.8974	2	3	2	1	78	8.528	9.32	6.27862	2
FALSE	High	Master Protein	A0A0C7DAN1	Probable conserved membrane protein OS=Mycobacterium bovis GN=MBO1_00654 PE=4 SV=1	0	12.0023	17.8571	3	3	3	1	336	35.416	7.01	7.80607	3
FALSE	High	Master Protein	A0A0K2I1E3	Uncharacterized protein OS=Mycobacterium bovis BCG GN=RN06_4203 PE=4 SV=1	0	11.9925	27.8571	4	4	4	1	280	29.223	10.23	7.62447	4
FALSE	High	Master Protein	A0A083WMX6	Uncharacterized protein OS=Mycobacterium bovis GN=BOVR_00315 PE=4 SV=1	0	11.9248	15.6522	2	3	2	1	230	25.564	8.09	8.57657	2
FALSE	High	Master Protein	A0A0C7DDA9	Diaminopimelate epimerase OS=Mycobacterium bovis GN=dapF PE=3 SV=1	0	11.9054	10.9589	2	3	2	1	292	30.009	5.21	9.94074	2
FALSE	High	Master Protein	A0A083W6T5	Tyrosine recombinase XerD OS=Mycobacterium bovis GN=xerD PE=3 SV=1	0	11.8479	23.7942	5	5	5	1	311	33.497	10.26	6.26393	5
FALSE	High	Master Protein	A1KKP9	Nicotinate-nucleotide--dimethylbenzimidazole phosphoribosyltransferase OS=Mycobacterium bovis (strain BCG / Pasteur 1173P2) GN=cobT PE=3 SV=1	0	11.8373	21.0526	4	5	4	1	361	36.389	5.22	4.9343	4
FALSE	High	Master Protein	A0A0C7DUG4	UDP-galactopyranose mutase (UGM) (U DP-GALP mutase) (Uridine 5-diphosphate galactopyranose muta se) OS=Mycobacterium bovis GN=MBO1_00661 PE=4 SV=1	0	11.8101	16.0401	5	7	5	1	399	45.786	5.81	8.10619	5
FALSE	High	Master Protein	A0A0K2HYK2	Alanine--tRNA ligase OS=Mycobacterium bovis BCG GN=alaS PE=3 SV=1	0	11.8069	10.7301	5	6	5	1	904	97.283	5.55	7.84416	5
FALSE	High	Master Protein	A0A0H3P6G5	Conserved protein OS=Mycobacterium bovis (strain ATCC BAA-935 / AF2122/97) GN=Mb3746 PE=4 SV=1	0	11.7599	17.6596	4	4	4	1	470	52.944	7.49	7.2197	4
FALSE	High	Master Protein	A0A0H3P757	Possible oxidoreductase OS=Mycobacterium bovis (strain ATCC BAA-935 / AF2122/97) GN=Mb0144 PE=4 SV=1	0	11.7338	17.0588	5	5	5	1	340	36.934	8.47	8.87804	5
FALSE	High	Master Protein	A0A0K2I1Y9	Inorganic pyrophosphatase OS=Mycobacterium bovis BCG GN=ppa PE=3 SV=1	0	11.7033	41.9753	4	4	4	1	162	18.317	4.93	7.60542	4
FALSE	High	Master Protein	A0A0H3P6R3	Conserved protein OS=Mycobacterium bovis (strain ATCC BAA-935 / AF2122/97) GN=Mb3880 PE=4 SV=1	0	11.6954	33.4862	5	5	5	1	218	23.796	11.63	7.437	5
FALSE	High	Master Protein	A0A083WB08	Co-chaperone YbbN OS=Mycobacterium bovis GN=BOVR_07045 PE=4 SV=1	0	11.6847	24.6711	3	4	3	1	304	32.151	4.79	4.76612	3
FALSE	High	Master Protein	A0A0H3M2E0	Possible membrane protein OS=Mycobacterium bovis (strain BCG / Pasteur 1173P2) GN=BCG_0079c PE=4 SV=1	0	11.6704	17.6471	4	5	4	1	289	30.8	7.42	4.90254	4
FALSE	High	Master Protein	A0A0H3P5S6	Conserved protein OS=Mycobacterium bovis (strain ATCC BAA-935 / AF2122/97) GN=Mb1490 PE=4 SV=1	0	11.6665	26.8293	4	4	4	1	287	31.407	6.54	10.4739	4
FALSE	High	Master Protein	A0A0H3P1P7	Conserved protein OS=Mycobacterium bovis (strain ATCC BAA-935 / AF2122/97) GN=Mb0367c PE=4 SV=1	0	11.6646	21.3793	2	2	2	1	145	15.32	5.49	7.4051	2
FALSE	High	Master Protein	A0A0K2I0T5	ATP-dependent 6-phosphofructokinase OS=Mycobacterium bovis BCG GN=pfkA PE=3 SV=1	0	11.6496	18.0758	3	5	3	1	343	36.857	6.67	8.42782	3
FALSE	High	Master Protein	A0A0H3M7N3	Probable bifunctional protein, CobI-CobJ fusion protein: S-adenosyl-L-methionine-precorrin-2 methyl transferase + precorrin-3 methylase OS=Mycobacterium bovis (strain BCG / Pasteur 1173P2) GN=cobI PE=3 SV=1	0	11.6413	13.5827	4	5	4	1	508	53.878	6.73	8.14738	4
FALSE	High	Master Protein	A0A0H3P7C2	PROBABLE CONSERVED LIPOPROTEIN LPPY OS=Mycobacterium bovis (strain ATCC BAA-935 / AF2122/97) GN=lppY PE=4 SV=1	0	11.6034	20.8723	4	4	4	1	321	33.911	6.96	5.03222	4
FALSE	High	Master Protein	A0A083WDA5	UDP-glucose pyrophosphorylase OS=Mycobacterium bovis GN=BOVR_05255 PE=4 SV=1	0	11.5774	19.6078	3	3	3	1	306	32.386	5.12	5.52465	3
FALSE	High	Master Protein	A0A0H3P6P8	POSSIBLE ACYL-COA DEHYDROGENASE FADE36 OS=Mycobacterium bovis (strain ATCC BAA-935 / AF2122/97) GN=fadE36 PE=4 SV=1	0	11.572	19.943	4	4	4	1	351	38.541	5.4	7.01013	4
FALSE	High	Master Protein	A0A0K2HVX5	Cytidylate kinase OS=Mycobacterium bovis BCG GN=cmk PE=3 SV=1	0	11.5355	15.2174	2	2	2	1	230	24.163	5.24	6.83203	2
FALSE	High	Master Protein	A0A083VT48	Putative acetolactate synthase large subunit IlvX (ALS) (Acetohydroxy-acid synthase large subun it) (AHAS) OS=Mycobacterium bovis GN=BOVR_18315 PE=4 SV=1	0	11.5346	23.301	5	6	5	1	515	52.04	4.93	5.59815	5
FALSE	High	Master Protein	A0A083W4C8	Putative membrane protein OS=Mycobacterium bovis GN=BOVR_09970 PE=4 SV=1	0	11.5131	18.4669	3	4	3	1	287	31.943	9.69	9.28236	3
FALSE	High	Master Protein	A0A0C7DE94	Transcriptional regulator OS=Mycobacterium bovis GN=MBO1_01931 PE=4 SV=1	0	11.4404	31.3433	4	5	4	1	268	29.26	5.72	6.93321	4
FALSE	High	Master Protein	A0A0H4Y6T5	Peptide deformylase OS=Mycobacterium bovis GN=def PE=3 SV=1	0	11.4045	25.3807	3	3	3	1	197	20.925	5.1	8.82793	3
FALSE	High	Master Protein	A0A0H3P6E8	Conserved protein OS=Mycobacterium bovis (strain ATCC BAA-935 / AF2122/97) GN=Mb3708 PE=4 SV=1	0	11.3874	26.0188	5	5	5	1	319	34.373	9.04	8.1505	5
FALSE	High	Master Protein	A0A083W9M3	Riboflavin synthase (RS) OS=Mycobacterium bovis GN=BOVR_07495 PE=4 SV=1	0	11.3358	15.9204	2	2	2	1	201	21.307	5.15	3.96305	2
FALSE	High	Master Protein	A0A0H3P382	Probable polyketide synthase pks5 OS=Mycobacterium bovis (strain ATCC BAA-935 / AF2122/97) GN=pks5 PE=4 SV=1	0	11.332	1.70778	2	3	1	1	2108	223.72	5.3	4.94244	2
FALSE	High	Master Protein	A0A0K2HWF2	Uncharacterized protein OS=Mycobacterium bovis BCG GN=RN06_2309 PE=4 SV=1	0	11.3198	26.6932	4	5	4	1	251	27.223	9.01	10.2642	4
FALSE	High	Master Protein	C1AQ71	UDP-N-acetylmuramoylalanine--D-glutamate ligase OS=Mycobacterium bovis (strain BCG / Tokyo 172 / ATCC 35737 / TMC 1019) GN=murD PE=3 SV=2	0	11.3042	9.07258	3	4	3	1	496	50.223	5.48	8.03967	3
FALSE	High	Master Protein	A0A0H3M924	Uncharacterized protein OS=Mycobacterium bovis (strain BCG / Pasteur 1173P2) GN=BCG_0950c PE=4 SV=1	0	11.2443	33.3333	2	2	2	1	87	9.914	6.55	7.05065	2
FALSE	High	Master Protein	A0A083WEG1	Acyl-CoA synthetase OS=Mycobacterium bovis GN=BOVR_06310 PE=4 SV=1	0	11.2031	9.86159	3	3	3	1	578	62.718	5.4	8.21813	3
FALSE	High	Master Protein	P65590	Transcription termination/antitermination protein NusG OS=Mycobacterium bovis (strain ATCC BAA-935 / AF2122/97) GN=nusG PE=3 SV=1	0	11.1906	17.6471	2	2	2	1	238	25.431	4.81	7.01367	2
FALSE	High	Master Protein	A0A0H3M7L8	Conserved hypothetical alanine rich protein OS=Mycobacterium bovis (strain BCG / Pasteur 1173P2) GN=BCG_2864 PE=4 SV=1	0	11.1131	27.1605	3	4	3	1	162	16.929	5.76	9.08583	3
FALSE	High	Master Protein	A0A0H3MFW3	Uncharacterized protein OS=Mycobacterium bovis (strain BCG / Pasteur 1173P2) GN=BCG_2597 PE=4 SV=1	0	11.104	18.5629	2	2	2	1	167	18.99	9.1	5.56582	2
FALSE	High	Master Protein	A0A109SA26	RNA polymerase sigma factor OS=Mycobacterium bovis BCG GN=RN06_3905 PE=3 SV=1	0	11.0912	21.9608	4	4	4	1	255	28.274	5.3	5.88716	4
FALSE	High	Master Protein	A0A0K2I1R2	Acetyl-CoA acetyltransferase FadA OS=Mycobacterium bovis BCG GN=RN06_4335 PE=4 SV=1	0	11.0874	23.2737	4	5	4	1	391	41.303	5.68	7.3497	4
FALSE	High	Master Protein	A0A0H3M4I3	Possible long-chain acyl-CoA synthase OS=Mycobacterium bovis (strain BCG / Pasteur 1173P2) GN=BCG_1721 PE=4 SV=1	0	11.0589	7.80781	4	4	4	1	999	107.327	6.48	8.7605	4
FALSE	High	Master Protein	A0A0H3P7E4	POSSIBLE PROTEIN TRANSPORT PROTEIN SECE2 OS=Mycobacterium bovis (strain ATCC BAA-935 / AF2122/97) GN=secE2 PE=4 SV=1	0	11.0522	54.9296	2	3	2	1	71	7.961	8.56	5.83171	2
FALSE	High	Master Protein	A0A0H3MAH1	Putative oxidoreductase OS=Mycobacterium bovis (strain BCG / Pasteur 1173P2) GN=BCG_3785 PE=4 SV=1	0	11.0475	10.5105	3	3	3	1	333	34.751	5.67	6.75049	3
FALSE	High	Master Protein	P64200	Aspartyl/glutamyl-tRNA(Asn/Gln) amidotransferase subunit B OS=Mycobacterium bovis (strain ATCC BAA-935 / AF2122/97) GN=gatB PE=3 SV=1	0	11.0008	21.611	5	5	5	1	509	54.599	5.2	3.6784	5
FALSE	High	Master Protein	A0A0H3P5U9	HYPOTHETICAL OXIDOREDUCTASE OS=Mycobacterium bovis (strain ATCC BAA-935 / AF2122/97) GN=Mb3259c PE=4 SV=1	0	10.9918	14.7368	3	3	3	1	380	40.716	9.09	7.78606	3
FALSE	High	Master Protein	A0A0M4P9P4	Secretion protein EspG OS=Mycobacterium bovis GN=BOVR_20215 PE=4 SV=1	0	10.9845	23.1884	3	3	3	1	276	29.578	6.24	5.4231	3
FALSE	High	Master Protein	A0A0H3M5R1	Methylated-DNA--protein-cysteine methyltransferase OS=Mycobacterium bovis (strain BCG / Pasteur 1173P2) GN=ogt PE=3 SV=1	0	10.9677	29.697	3	3	3	1	165	17.847	6.38	7.78483	3
FALSE	High	Master Protein	O52585	Putative uncharacterized protein OS=Mycobacterium bovis BCG PE=4 SV=1	0	10.9064	32.0463	4	5	4	1	259	27.071	11.71	7.70166	4
FALSE	High	Master Protein	A0A0M4NGB5	Uncharacterized protein OS=Mycobacterium bovis GN=BOVR_09400 PE=4 SV=1	0	10.9006	27.3171	5	5	5	1	410	40.02	4.45	7.33855	5
FALSE	High	Master Protein	A0A0C7DSJ7	Probable fatty-acid-CoA ligase FadD8 (Fatty-acid-CoA synthetase) (Fatty-acid-CoA synthase) (Substrate--CoA l igase) OS=Mycobacterium bovis GN=MBO1_00382 PE=4 SV=1	0	10.8861	8.05604	2	3	2	1	571	61.028	6.05	4.62415	2
FALSE	High	Master Protein	A0A0K2I1X3	Iron-regulated H-NS-like protein OS=Mycobacterium bovis BCG GN=RN06_4398 PE=4 SV=1	0	10.8798	37.5	3	4	3	1	112	12.091	10.08	10.1892	3
FALSE	High	Master Protein	A0A120IQD8	Mannose-6-phosphate isomerase OS=Mycobacterium bovis BCG GN=RN06_3941 PE=3 SV=1	0	10.8775	6.40835	4	4	4	1	671	70.257	5	7.35873	4
FALSE	High	Master Protein	A0A083W629	Conserved protein TB16.3 OS=Mycobacterium bovis GN=BOVR_11305 PE=4 SV=1	0	10.8609	41.6667	3	5	3	1	144	16.314	4.86	9.89305	3
FALSE	High	Master Protein	A0A083WMW4	Inositol-3-phosphate synthase (IPS) (Myo-inositol 1-phosphate synthase) (MI-1-P synthase) (MIP synthase) OS=Mycobacterium bovis GN=MBO1_03318 PE=4 SV=1	0	10.8424	27.248	5	5	5	1	367	39.97	5.14	6.55611	5
FALSE	High	Master Protein	A0A083W200	ATP-dependent Clp protease proteolytic subunit OS=Mycobacterium bovis GN=clpP PE=3 SV=1	0	10.8244	31.7757	4	4	4	1	214	23.525	5.15	7.04172	4
FALSE	High	Master Protein	A0A0H3M5B7	Possible 23S rRNA methyltransferase tsnR OS=Mycobacterium bovis (strain BCG / Pasteur 1173P2) GN=tsnR PE=3 SV=1	0	10.8189	19.2308	3	3	3	1	260	26.847	6.95	8.26014	3
FALSE	High	Master Protein	A0A0C7DVP1	Possible transferase (Possibly glycosyltransferas e) OS=Mycobacterium bovis GN=MBO_303667 PE=4 SV=1	0	10.8132	20.2492	4	4	4	1	321	35.195	9.32	7.61645	4
FALSE	High	Master Protein	A0A083VZX8	Conserved alanine and leucine rich protein (Rv271 4-like protein) (Uncharacterized protein) OS=Mycobacterium bovis GN=BOVR_14030 PE=4 SV=1	0	10.7722	20.679	3	3	3	1	324	35.569	4.82	5.0425	3
FALSE	High	Master Protein	A0A0K2HU33	Fructose-1,6-bisphosphatase OS=Mycobacterium bovis BCG GN=RN06_1380 PE=3 SV=1	0	10.7622	9.94475	2	3	2	1	362	38.06	5.47	8.97113	2
FALSE	High	Master Protein	A0A0H3M4P8	Uncharacterized protein OS=Mycobacterium bovis (strain BCG / Pasteur 1173P2) GN=BCG_1813 PE=4 SV=1	0	10.7537	23.5294	3	3	3	1	187	20.444	6.05	5.29029	3
FALSE	High	Master Protein	A0A0C7DLV4	Uncharacterized protein OS=Mycobacterium bovis GN=MBO1_02219 PE=4 SV=1	0	10.6225	26.1146	3	4	3	1	157	17.684	10.45	9.39791	3
FALSE	High	Master Protein	A0A0K2HVV9	CTP synthase OS=Mycobacterium bovis BCG GN=pyrG PE=3 SV=1	0	10.5725	12.9693	3	5	3	1	586	63.596	5.68	10.3777	3
FALSE	High	Master Protein	A0A0C7DLQ5	Methyltransferase OS=Mycobacterium bovis GN=MBO1_02182 PE=4 SV=1	0	10.5611	34.8178	4	5	4	1	247	25.504	5.06	13.3914	4
FALSE	High	Master Protein	A0A0K2I128	Transposase fusion protein OS=Mycobacterium bovis BCG GN=RN06_4059 PE=4 SV=1	0	10.5228	12.807	4	4	4	1	570	62.922	9.6	5.49749	4
FALSE	High	Master Protein	A0A0K2HR78	Membrane protein OS=Mycobacterium bovis BCG GN=RN06_0252 PE=4 SV=1	0	10.5059	33.79	4	5	4	1	219	23.506	5	10.5117	4
FALSE	High	Master Protein	A0A0H4XP45	Spermidine/putrescine ABC transporter ATP-binding protein OS=Mycobacterium bovis GN=BOVR_07745 PE=4 SV=1	0	10.4949	17.5719	3	3	3	1	313	33.738	5.16	7.23267	3
FALSE	High	Master Protein	A0A0K2HRD2	Heat shock protein OS=Mycobacterium bovis BCG GN=RN06_0314 PE=4 SV=1	0	10.4689	30.8176	3	3	3	1	159	17.775	5.43	7.60148	3
FALSE	High	Master Protein	A0A0M4ND32	Uncharacterized protein OS=Mycobacterium bovis GN=BOVR_11300 PE=4 SV=1	0	10.4585	15.9494	4	4	4	1	395	42.302	5.49	10.2294	4
FALSE	High	Master Protein	A0A0C7DBA3	Phosphoribosylaminoimidazole-succinocarboxamide synthase OS=Mycobacterium bovis GN=purC PE=3 SV=1	0	10.4442	22.5589	5	5	5	1	297	32.938	5.34	3.54462	5
FALSE	High	Master Protein	A0A0C7DLG1	Uncharacterized protein OS=Mycobacterium bovis GN=MBO1_02386 PE=4 SV=1	0	10.4053	16.8367	2	3	2	1	196	20.87	6.15	8.39453	2
FALSE	High	Master Protein	A0A0C7DKU4	Uncharacterized protein OS=Mycobacterium bovis GN=MBO1_03789 PE=4 SV=1	0	10.3932	16.4103	2	3	2	1	195	21.661	4.63	4.87119	2
FALSE	High	Master Protein	A1KPR8	2-C-methyl-D-erythritol 4-phosphate cytidylyltransferase OS=Mycobacterium bovis (strain BCG / Pasteur 1173P2) GN=ispD PE=3 SV=1	0	10.3574	35.0649	4	4	4	1	231	24.059	4.89	7.73036	4
FALSE	High	Master Protein	A0A0C7DL21	Ribonuclease VapC OS=Mycobacterium bovis GN=vapC PE=3 SV=1	0	10.3565	30.8271	3	4	3	1	133	14.351	5.26	8.7946	3
FALSE	High	Master Protein	A0A0H3MBX6	Probable conserved membrane protein mmpS3 OS=Mycobacterium bovis (strain BCG / Pasteur 1173P2) GN=mmpS3 PE=4 SV=1	0	10.2982	15.7191	2	4	2	1	299	30.936	4.53	10.0138	2
FALSE	High	Master Protein	P0A5R1	Pantothenate synthetase OS=Mycobacterium bovis (strain ATCC BAA-935 / AF2122/97) GN=panC PE=3 SV=1	0	10.2797	26.5372	4	4	4	1	309	32.657	6.09	6.27456	4
FALSE	High	Master Protein	P59956	Transketolase OS=Mycobacterium bovis (strain ATCC BAA-935 / AF2122/97) GN=tkt PE=3 SV=1	0	10.2709	10.7143	4	5	4	1	700	75.494	5.12	4.75571	4
FALSE	High	Master Protein	A0A0H3MG56	Uncharacterized protein OS=Mycobacterium bovis (strain BCG / Pasteur 1173P2) GN=BCG_2712c PE=4 SV=1	0	10.2461	53	2	2	2	1	100	10.909	4.37	7.63133	2
FALSE	High	Master Protein	A0A0H3P572	PROBABLE MEMBRANE PROTEIN OS=Mycobacterium bovis (strain ATCC BAA-935 / AF2122/97) GN=Mb2822 PE=4 SV=1	0	10.233	31.9048	3	3	3	1	210	22.972	7.3	9.53694	3
FALSE	High	Master Protein	A0A0H3MCS9	Probable DNA/pantothenate metabolism flavoprotein homolog dfp OS=Mycobacterium bovis (strain BCG / Pasteur 1173P2) GN=dfp PE=4 SV=1	0	10.1764	24.6411	4	4	4	1	418	43.55	7.17	2.5255	4
FALSE	High	Master Protein	A1KMQ3	30S ribosomal protein S16 OS=Mycobacterium bovis (strain BCG / Pasteur 1173P2) GN=rpsP PE=3 SV=1	0	10.1702	56.1728	4	4	4	1	162	17.426	9.88	6.95678	4
FALSE	High	Master Protein	A0A0C7DPJ5	Sulfate/thiosulfate import ATP-binding protein CysA OS=Mycobacterium bovis GN=cysA PE=3 SV=1	0	10.1686	20.3966	3	4	3	1	353	37.68	9.31	10.2005	3
FALSE	High	Master Protein	A0A0H3P8L2	2-dehydropantoate 2-reductase OS=Mycobacterium bovis (strain ATCC BAA-935 / AF2122/97) GN=Mb2603 PE=3 SV=1	0	10.1527	20.2899	3	3	3	1	276	29.393	7.08	6.81154	3
FALSE	High	Master Protein	A0A0K2HSV7	Mycofactocin system heme/flavin oxidoreductase MftD OS=Mycobacterium bovis BCG GN=RN06_0858 PE=4 SV=1	0	10.1392	21.4646	3	3	3	1	396	42.135	8.85	6.00596	3
FALSE	High	Master Protein	A0A0H3MJE7	Putative ferredoxin-dependent glutamate synthase [NADPH] (Large subunit) gltB OS=Mycobacterium bovis (strain BCG / Pasteur 1173P2) GN=gltB PE=4 SV=1	0	10.1171	3.7983	3	4	3	1	1527	165.84	5.95	3.87602	3
FALSE	High	Master Protein	C1AEQ8	50S ribosomal protein L27 OS=Mycobacterium bovis (strain BCG / Tokyo 172 / ATCC 35737 / TMC 1019) GN=rpmA PE=3 SV=1	0	10.0961	36.0465	4	4	4	1	86	8.963	11.53	9.44121	4
FALSE	High	Master Protein	A0A0Y1D050	Uroporphyrinogen decarboxylase OS=Mycobacterium bovis BCG GN=hemE PE=3 SV=1	0	9.99426	26.8817	6	6	6	1	372	39.096	6.07	11.382	6
FALSE	High	Master Protein	A0A0C7DHS5	Uncharacterized protein OS=Mycobacterium bovis GN=MBO1_03198 PE=4 SV=1	0	9.9902	22.0126	3	4	3	1	159	17.671	7.99	10.2357	3
FALSE	High	Master Protein	P65721	Phosphate-specific transport system accessory protein PhoU homolog 2 OS=Mycobacterium bovis (strain ATCC BAA-935 / AF2122/97) GN=phoU2 PE=3 SV=1	0	9.97399	24.8826	3	3	3	1	213	23.499	5.44	5.50228	3
FALSE	High	Master Protein	A0A0H3MF01	Probable transmembrane cytochrome C oxidase (Subunit ii) ctaC OS=Mycobacterium bovis (strain BCG / Pasteur 1173P2) GN=ctaC PE=4 SV=1	0	9.95112	10.7438	2	2	2	1	363	40.454	7.84	6.0806	2
FALSE	High	Master Protein	A0A0C7DSL6	Uncharacterized protein OS=Mycobacterium bovis GN=MBO1_00408 PE=4 SV=1	0	9.90444	15.5894	2	3	2	1	263	27.57	4.61	9.16281	2
FALSE	High	Master Protein	P66430	30S ribosomal protein S15 OS=Mycobacterium bovis (strain ATCC BAA-935 / AF2122/97) GN=rpsO PE=3 SV=1	0	9.90065	34.8315	3	3	3	1	89	10.469	10.45	5.64806	3
FALSE	High	Master Protein	A0A0C7DGS2	Translation initiation factor IF-1 OS=Mycobacterium bovis GN=infA PE=3 SV=1	0	9.89534	15.5172	2	3	2	1	116	13.181	7.37	6.71922	2
FALSE	High	Master Protein	P0A655	Nucleoid-associated protein Mb3743c OS=Mycobacterium bovis (strain ATCC BAA-935 / AF2122/97) GN=Mb3743c PE=3 SV=1	0	9.86268	29.3233	2	3	2	1	133	13.349	4.88	5.1485	2
FALSE	High	Master Protein	A0A0C7DDN5	50S ribosomal protein L21 OS=Mycobacterium bovis GN=rplU PE=3 SV=1	0	9.84292	36.8421	3	3	3	1	114	12.308	9.91	7.89894	3
FALSE	High	Master Protein	A0A083VRF9	ATPase OS=Mycobacterium bovis GN=BOVR_19145 PE=4 SV=1	0	9.80698	13.5294	3	3	3	1	340	35.834	5.43	5.71465	3
FALSE	High	Master Protein	A0A0H3MA63	Uncharacterized protein OS=Mycobacterium bovis (strain BCG / Pasteur 1173P2) GN=BCG_0310c PE=4 SV=1	0	9.80354	9.81432	3	4	3	1	377	41.052	7.61	5.38893	3
FALSE	High	Master Protein	Q09IV4	Outer membrane protein A OS=Mycobacterium bovis GN=BOVR_04750 PE=3 SV=1	0	9.78778	28.8344	5	5	5	1	326	33.554	7.39	3.43054	5
FALSE	High	Master Protein	A0A0Y1C5R1	2,3,4,5-tetrahydropyridine-2,6-dicarboxylate N-succinyltransferase OS=Mycobacterium bovis BCG GN=dapD PE=3 SV=1	0	9.78422	12.8049	3	4	3	1	328	33.685	5.97	10.782	3
FALSE	High	Master Protein	A0A083VWH2	Hydrolase, Ama/HipO/HyuC family (Possible N-acyl-L-amino acid amidohydrolase AmiA1 (N-acyl-L-amino acid amin ohydrolase)) OS=Mycobacterium bovis GN=BOVR_17125 PE=4 SV=1	0	9.77293	18.2519	3	3	3	1	389	41.201	5.92	6.3959	3
FALSE	High	Master Protein	A0A0H3M5J5	Iron-sulfur cluster carrier protein OS=Mycobacterium bovis (strain BCG / Pasteur 1173P2) GN=mrp PE=3 SV=1	0	9.72276	14.8718	4	4	4	1	390	41.038	6.67	9.72212	4
FALSE	High	Master Protein	A0A0H3MCE9	Possible conserved transmembrane protein OS=Mycobacterium bovis (strain BCG / Pasteur 1173P2) GN=BCG_2368 PE=4 SV=1	0	9.6882	12.7273	4	4	4	1	660	69.988	8.38	8.90985	4
FALSE	High	Master Protein	A0A0H4XUH9	Phenylalanine--tRNA ligase alpha subunit OS=Mycobacterium bovis GN=pheS PE=3 SV=1	0	9.68782	12.7841	3	3	3	1	352	38.518	5.29	6.06363	3
FALSE	High	Master Protein	C1AKF6	Deoxyribose-phosphate aldolase OS=Mycobacterium bovis (strain BCG / Tokyo 172 / ATCC 35737 / TMC 1019) GN=deoC PE=3 SV=1	0	9.6865	16.9643	3	4	3	1	224	22.054	5.8	7.05633	3
FALSE	High	Master Protein	A0A0H3P2U4	Mycothiol S-conjugate amidase OS=Mycobacterium bovis (strain ATCC BAA-935 / AF2122/97) GN=mca PE=3 SV=1	0	9.68599	11.4583	2	2	2	1	288	32.711	5.27	4.23623	2
FALSE	High	Master Protein	A0A0K2I274	tRNA threonylcarbamoyladenosine biosynthesis protein OS=Mycobacterium bovis BCG GN=RN06_4188 PE=4 SV=1	0	9.68326	13.6905	2	2	2	1	168	18.202	6.7	5.26343	2
FALSE	High	Master Protein	A0A0C7DCS0	Uncharacterized protein OS=Mycobacterium bovis GN=MBO1_01343 PE=4 SV=1	0	9.68023	22.9299	3	4	3	1	157	17.353	8.53	9.42569	3
FALSE	High	Master Protein	A0A0G4DQD1	Glycerol kinase OS=Mycobacterium bovis GN=glpK PE=3 SV=1	0	9.6425	5.79151	2	2	2	1	518	55.854	5.08	6.12975	2
FALSE	High	Master Protein	P66843	Signal recognition particle receptor FtsY OS=Mycobacterium bovis (strain ATCC BAA-935 / AF2122/97) GN=ftsY PE=3 SV=1	0	9.64005	24.4076	5	5	5	1	422	44.005	5.36	8.6128	5
FALSE	High	Master Protein	A0A0H3M1E6	Possible conserved secreted protein OS=Mycobacterium bovis (strain BCG / Pasteur 1173P2) GN=BCG_0421c PE=4 SV=1	0	9.59781	17.2535	3	4	3	1	284	31.782	10.11	5.60305	3
FALSE	High	Master Protein	A0A0H3P5B9	Probable penicillin-binding protein dacb2 (D-alanyl-d-alanine carboxypeptidase) (Dd-peptidase) (Dd-carboxypeptidase) (Pbp) (Dd-transpeptidase) (Serine-type d-ala-d-ala carboxypeptidase) (D-amino acid... OS=Mycobacterium bovis (strain ATCC BAA-935 / AF2122/97) GN=dacB2 PE=3 SV=1	0	9.59083	26.8041	3	3	3	1	291	29.728	5.24	4.82569	3
FALSE	High	Master Protein	A0A0H3M0U8	Possible mce-family lipoprotein lprK (MCE-family lipoprotein mce1E) OS=Mycobacterium bovis (strain BCG / Pasteur 1173P2) GN=lprK PE=4 SV=1	0	9.5415	19.7436	4	4	4	1	390	42.213	8.24	5.47879	4
FALSE	High	Master Protein	A0A0K2HSW5	S-adenosyl-L-methionine-dependent methyltransferase OS=Mycobacterium bovis BCG GN=RN06_0897 PE=3 SV=1	0	9.52406	12.8931	3	4	3	1	318	34.929	5.08	6.80719	3
FALSE	High	Master Protein	A0A0H4XYQ1	TetR family transcriptional regulator OS=Mycobacterium bovis GN=BOVR_16625 PE=4 SV=1	0	9.48162	25	3	4	3	1	228	25.151	6.62	4.94757	3
FALSE	High	Master Protein	A0A083WM05	LLM class F420-dependent oxidoreductase OS=Mycobacterium bovis GN=BOVR_00240 PE=4 SV=1	0	9.46157	11.7424	2	3	2	1	264	28.506	6.52	7.23063	2
FALSE	High	Master Protein	A0A0C7DFT7	Uncharacterized protein Rv1332/MT1374 OS=Mycobacterium bovis GN=MBO1_02449 PE=4 SV=1	0	9.44527	39.9083	4	4	4	1	218	24.039	5.5	5.12637	4
FALSE	High	Master Protein	A0A0K2HUB3	Ribosome-binding ATPase YchF OS=Mycobacterium bovis BCG GN=ychF PE=3 SV=1	0	9.44433	18.7675	3	4	3	1	357	38.088	4.93	8.90712	3
FALSE	High	Master Protein	P66667	Ribonuclease 3 OS=Mycobacterium bovis (strain ATCC BAA-935 / AF2122/97) GN=rnc PE=3 SV=1	0	9.43465	16.6667	4	4	4	1	240	25.383	5.47	5.46763	4
FALSE	High	Master Protein	A0A0H3P5E2	POSSIBLE TRANSFERASE OS=Mycobacterium bovis (strain ATCC BAA-935 / AF2122/97) GN=Mb3060c PE=4 SV=1	0	9.43243	9.66667	2	2	2	1	300	33.044	10.26	5.93613	2
FALSE	High	Master Protein	A0A0Y1BI00	Penicillin-binding protein PbpA OS=Mycobacterium bovis BCG GN=RN06_0020 PE=4 SV=1	0	9.40905	19.9593	5	5	5	1	491	51.544	8.4	7.03925	5
FALSE	High	Master Protein	P0A5J1	Lipoprotein LpqH OS=Mycobacterium bovis (strain ATCC BAA-935 / AF2122/97) GN=lpqH PE=3 SV=1	0	9.39949	32.7044	3	4	3	1	159	15.138	7.08	7.93075	3
FALSE	High	Master Protein	A0A083W4Z3	LLM class F420-dependent oxidoreductase OS=Mycobacterium bovis GN=BOVR_09640 PE=4 SV=1	0	9.38902	18.8925	4	4	4	1	307	33.199	5.17	6.7765	4
FALSE	High	Master Protein	A0A0Y1B187	Phosphoserine/threonine phosphatase PstP OS=Mycobacterium bovis BCG GN=RN06_0022 PE=4 SV=1	0	9.37718	15.6538	5	6	5	1	543	57.456	6.65	7.03949	5
FALSE	High	Master Protein	A0A083VWD3	N-acetylglucosaminyl-diphospho-decaprenol L-rhamnosyltransferase OS=Mycobacterium bovis GN=BOVR_16925 PE=4 SV=1	0	9.33765	16.1716	2	3	2	1	303	33.455	9.73	8.64579	2
FALSE	High	Master Protein	A0A0K2HT11	50S ribosomal protein L24 OS=Mycobacterium bovis BCG GN=rplX PE=3 SV=1	0	9.32216	36.1905	2	4	2	1	105	11.468	10.36	5.28384	2
FALSE	High	Master Protein	A0A0C7DQ02	Two component sensory transduction protein OS=Mycobacterium bovis GN=MBO1_00139 PE=4 SV=1	0	9.30575	39.1304	5	5	5	1	230	25.149	4.98	7.55119	5
FALSE	High	Master Protein	A0A0C7DG47	Phthiocerol/phthiodiolone dimycocerosyl transfera se (Acyltransferase PapA5) (Phthiocerol/phthio diolone O-acyltransferase) (Polyketide synthase-associated protein A5) OS=Mycobacterium bovis GN=MBO1_02705 PE=4 SV=1	0	9.29993	10.5386	2	2	2	1	427	45.914	5.03	7.57314	2
FALSE	High	Master Protein	A0A0H3P3F9	Conserved protein OS=Mycobacterium bovis (strain ATCC BAA-935 / AF2122/97) GN=Mb1525 PE=4 SV=1	0	9.29844	69.4915	4	4	4	1	118	12.298	10.14	5.55414	4
FALSE	High	Master Protein	P64918	Uncharacterized protein Mb2023 OS=Mycobacterium bovis (strain ATCC BAA-935 / AF2122/97) GN=Mb2023 PE=4 SV=1	0	9.26172	9.68343	3	3	3	1	537	59.857	7.85	5.61902	3
FALSE	High	Master Protein	A0A083VX16	Uncharacterized protein OS=Mycobacterium bovis GN=BOVR_14975 PE=4 SV=1	0	9.23092	25.7951	3	4	3	1	283	30.584	5.73	10.5809	3
FALSE	High	Master Protein	A0A0K2HUI4	1D-myo-inositol 2-acetamido-2-deoxy-alpha-D-glucopyranoside deacetylase OS=Mycobacterium bovis BCG GN=mshB PE=3 SV=1	0	9.22646	14.1914	2	3	2	1	303	31.723	5.45	5.94732	2
FALSE	High	Master Protein	P66993	Anthranilate phosphoribosyltransferase OS=Mycobacterium bovis (strain ATCC BAA-935 / AF2122/97) GN=trpD PE=3 SV=1	0	9.14993	16.7568	3	3	3	1	370	37.716	6.44	6.85193	3
FALSE	High	Master Protein	A0A0H3P6W9	Conserved protein OS=Mycobacterium bovis (strain ATCC BAA-935 / AF2122/97) GN=Mb2281c PE=1 SV=1	0	9.13003	13.2353	2	3	2	1	272	28.367	5.38	5.54749	2
FALSE	High	Master Protein	A0A0H3MBU0	Uncharacterized protein OS=Mycobacterium bovis (strain BCG / Pasteur 1173P2) GN=BCG_1063 PE=4 SV=1	0	9.1001	9.87654	3	3	3	1	567	61.25	5.66	7.1706	3
FALSE	High	Master Protein	A0A083W0M7	tRNA pseudouridine synthase B OS=Mycobacterium bovis GN=truB PE=3 SV=1	0	9.05317	15.4362	3	4	3	1	298	31.8	9.52	9.56455	3
FALSE	High	Master Protein	C1AQ16	Pup--protein ligase OS=Mycobacterium bovis (strain BCG / Tokyo 172 / ATCC 35737 / TMC 1019) GN=pafA PE=3 SV=1	0	9.04665	7.9646	3	3	3	1	452	51.352	6.73	5.16635	3
FALSE	High	Master Protein	A0A0H3M7J4	Uncharacterized protein OS=Mycobacterium bovis (strain BCG / Pasteur 1173P2) GN=BCG_2638c PE=4 SV=1	0	9.04161	18.4615	2	3	2	1	195	21.855	6.81	5.43333	2
FALSE	High	Master Protein	A0A083WCQ6	Nucleotide-binding protein BOVR_07540 OS=Mycobacterium bovis GN=BOVR_07540 PE=3 SV=1	0	9.02561	17.608	4	4	4	1	301	32.892	6.98	6.75999	4
FALSE	High	Master Protein	Q7U272	Protein GrpE OS=Mycobacterium bovis (strain ATCC BAA-935 / AF2122/97) GN=grpE PE=3 SV=1	0	9.02399	15.3191	3	3	3	1	235	24.544	4.58	6.88534	3
FALSE	High	Master Protein	A0A0K2HWZ0	Universal stress protein OS=Mycobacterium bovis BCG GN=RN06_2485 PE=3 SV=1	0	9.00657	22.449	3	3	3	1	294	31.436	6.52	5.73838	3
FALSE	High	Master Protein	A0A0H3M5C1	Phenylalanine--tRNA ligase beta subunit OS=Mycobacterium bovis (strain BCG / Pasteur 1173P2) GN=pheT PE=3 SV=1	0	8.99221	15.1625	5	6	5	1	831	88.347	5.33	9.71992	5
FALSE	High	Master Protein	C1ANT2	Argininosuccinate lyase OS=Mycobacterium bovis (strain BCG / Tokyo 172 / ATCC 35737 / TMC 1019) GN=argH PE=3 SV=1	0	8.96867	5.74468	2	2	2	1	470	49.744	5.3	6.70434	2
FALSE	High	Master Protein	A0A083WF73	Phosphoribosylglycinamide formyltransferase OS=Mycobacterium bovis GN=purN PE=3 SV=1	0	8.94425	26.0465	3	4	3	1	215	22.402	6.64	9.75957	3
FALSE	High	Master Protein	A0A0H3MA44	Uncharacterized protein OS=Mycobacterium bovis (strain BCG / Pasteur 1173P2) GN=BCG_3709 PE=4 SV=1	0	8.93024	23.7681	4	5	4	1	345	37.944	6.1	10.9666	4
FALSE	High	Master Protein	C1AQ55	Dihydroorotate dehydrogenase (quinone) OS=Mycobacterium bovis (strain BCG / Tokyo 172 / ATCC 35737 / TMC 1019) GN=pyrD PE=3 SV=1	0	8.908	13.1653	3	3	3	1	357	37.922	9.73	6.6139	3
FALSE	High	Master Protein	A0A0C7DQC1	Amidohydrolase OS=Mycobacterium bovis GN=MBO1_00127 PE=4 SV=1	0	8.90241	34.0557	4	5	4	1	323	33.669	9.83	11.0031	4
FALSE	High	Master Protein	A0A0H3MDQ6	Pyruvate carboxylase OS=Mycobacterium bovis (strain BCG / Pasteur 1173P2) GN=pca PE=4 SV=1	0	8.88088	8.69565	5	5	5	1	1127	120.349	5.5	5.73849	5
FALSE	High	Master Protein	A0A083WHA8	Putative membrane protein mmpS4 (PGB14T-X) OS=Mycobacterium bovis GN=MBO1_00096 PE=4 SV=1	0	8.87339	47.1429	3	4	3	1	140	15.394	6.77	4.37593	3
FALSE	High	Master Protein	A0A0H3M745	Probable ferredoxin-dependant nitrite reductase nirA OS=Mycobacterium bovis (strain BCG / Pasteur 1173P2) GN=nirA PE=3 SV=1	0	8.86302	6.74956	3	3	3	1	563	62.958	6.46	4.50032	3
FALSE	High	Master Protein	A0A0H3M8I0	Chaperone protein DnaJ OS=Mycobacterium bovis (strain BCG / Pasteur 1173P2) GN=dnaJ2 PE=3 SV=1	0	8.85332	9.68586	3	3	3	1	382	40.464	6.68	6.59756	3
FALSE	High	Master Protein	A0A0D1PTA8	Protein PafC (Proteasome accessory factor C) OS=Mycobacterium bovis GN=BOVR_10850 PE=4 SV=1	0	8.82932	18.9873	3	4	3	1	316	33.743	4.82	10.0091	3
FALSE	High	Master Protein	A0A0H3M8R2	Hypothetical alanine and valine rich protein OS=Mycobacterium bovis (strain BCG / Pasteur 1173P2) GN=BCG_3115 PE=4 SV=1	0	8.82773	22.0339	4	4	4	1	295	32.251	8.16	4.06096	4
FALSE	High	Master Protein	A0A083W7V1	DNA repair protein RecN OS=Mycobacterium bovis GN=BOVR_08815 PE=3 SV=1	0	8.82318	10.2215	2	2	2	1	587	62.191	5.27	7.15724	2
FALSE	High	Master Protein	A0A0C7DIQ8	Invasion-associated protein OS=Mycobacterium bovis GN=MBO1_03637 PE=4 SV=1	0	8.81539	11.8577	2	3	2	1	253	26.02	9.85	7.47774	2
FALSE	High	Master Protein	P0A5N5	Alkyl hydroperoxide reductase AhpD OS=Mycobacterium bovis (strain ATCC BAA-935 / AF2122/97) GN=ahpD PE=3 SV=1	0	8.81428	25.9887	3	3	3	1	177	18.769	7.03	7.34886	3
FALSE	High	Master Protein	A0A0C7DK96	Pseudouridine synthase OS=Mycobacterium bovis GN=MBO1_03504 PE=3 SV=1	0	8.80677	23.2283	4	4	4	1	254	27.58	9.33	8.05793	4
FALSE	High	Master Protein	A0A0H3P7B6	Uncharacterized protein OS=Mycobacterium bovis (strain ATCC BAA-935 / AF2122/97) GN=Mb2999c PE=4 SV=1	0	8.8019	7.59494	3	3	3	1	553	55.345	4.88	4.22031	3
FALSE	High	Master Protein	A0A0K2HRD1	Dihydroxy-acid dehydratase OS=Mycobacterium bovis BCG GN=ilvD PE=3 SV=1	0	8.80149	16	4	4	4	1	575	59.314	5.26	3.79579	4
FALSE	High	Master Protein	A0A0H4XS29	Acyl-CoA thioesterase II OS=Mycobacterium bovis GN=BOVR_13535 PE=4 SV=1	0	8.78646	9.96441	2	2	2	1	281	31.515	6.46	2.94585	2
FALSE	High	Master Protein	A0A0K2HUN9	Uncharacterized protein OS=Mycobacterium bovis BCG GN=RN06_1589 PE=4 SV=1	0	8.76948	44.0476	4	5	4	1	168	17.698	7.12	4.6743	4
FALSE	High	Master Protein	A0A083VSM7	Putative lipoprotein LpqE OS=Mycobacterium bovis GN=BOVR_18695 PE=4 SV=1	0	8.75788	39.011	4	4	4	1	182	18.807	9.35	9.24854	4
FALSE	High	Master Protein	A0A0K2HRL5	FHA domain-containing protein FhaB OS=Mycobacterium bovis BCG GN=RN06_0023 PE=4 SV=1	0	8.74831	16.129	2	2	2	1	155	17.141	10.8	5.06875	2
FALSE	High	Master Protein	P64035	Elongation factor P OS=Mycobacterium bovis (strain ATCC BAA-935 / AF2122/97) GN=efp PE=3 SV=1	0	8.72568	30.4813	3	3	3	1	187	20.395	5.87	2.34691	3
FALSE	High	Master Protein	A0A0C7DH36	NADH pyrophosphatase OS=Mycobacterium bovis GN=nudC PE=3 SV=1	0	8.72083	9.58549	2	2	2	1	386	41.36	6.99	6.84698	2
FALSE	High	Master Protein	A0A0H3M0M7	Uncharacterized protein OS=Mycobacterium bovis (strain BCG / Pasteur 1173P2) GN=BCG_0110c PE=4 SV=1	0	8.72023	17.7665	3	3	3	1	197	21.599	5.34	7.79374	3
FALSE	High	Master Protein	A0A083WDL7	Uncharacterized protein Rv1280c/MT1317 OS=Mycobacterium bovis GN=MBO1_02391 PE=4 SV=1	0	8.69733	6.09137	2	2	2	1	591	63.437	7.06	6.44989	2
FALSE	High	Master Protein	A0A0H3MHJ6	N5-carboxyaminoimidazole ribonucleotide mutase OS=Mycobacterium bovis (strain BCG / Pasteur 1173P2) GN=purE PE=3 SV=1	0	8.6814	34.4828	4	4	4	1	174	17.762	6.57	6.10621	4
FALSE	High	Master Protein	A0A083WMH4	Oxidoreductase OS=Mycobacterium bovis GN=BOVR_00860 PE=4 SV=1	0	8.63561	20.2673	5	5	5	1	449	47.326	6.28	6.33382	5
FALSE	High	Master Protein	A0A0K2HSW3	Phosphomethylpyrimidine synthase OS=Mycobacterium bovis BCG GN=thiC PE=3 SV=1	0	8.59878	11.3346	3	3	3	1	547	59.86	5.44	6.7893	3
FALSE	High	Master Protein	A0A0D1Q058	Esterase OS=Mycobacterium bovis GN=BOVR_04095 PE=4 SV=1	0	8.57701	19.802	4	5	4	1	303	30.619	6.68	8.99799	4
FALSE	High	Master Protein	A0A083W1V8	Lysophospholipase OS=Mycobacterium bovis GN=BOVR_12525 PE=4 SV=1	0	8.57594	8.09717	2	2	2	1	247	27.208	9.07	5.74848	2
FALSE	High	Master Protein	A0A0K2HXS5	Pyruvate dehydrogenase E1 component OS=Mycobacterium bovis BCG GN=RN06_2752 PE=4 SV=1	0	8.49823	7.52688	4	4	4	1	930	103.376	5.97	7.66431	4
FALSE	High	Master Protein	A0A0H3P3A6	Uncharacterized protein OS=Mycobacterium bovis (strain ATCC BAA-935 / AF2122/97) GN=Mb1915c PE=4 SV=1	0	8.49204	16.4557	2	3	2	1	158	17.773	7.91	2.11919	2
FALSE	High	Master Protein	A0A0C7DP42	Nucleoside diphosphate kinase OS=Mycobacterium bovis GN=ndk PE=3 SV=1	0	8.48249	27.8571	3	3	3	1	140	14.869	5.48	4.89011	3
FALSE	High	Master Protein	P65461	UDP-N-acetylenolpyruvoylglucosamine reductase OS=Mycobacterium bovis (strain ATCC BAA-935 / AF2122/97) GN=murB PE=3 SV=1	0	8.43774	32.5203	5	5	5	1	369	38.497	6.87	6.2233	5
FALSE	High	Master Protein	Q7VEP8	UDP-N-acetylglucosamine--N-acetylmuramyl-(pentapeptide) pyrophosphoryl-undecaprenol N-acetylglucosamine transferase OS=Mycobacterium bovis (strain ATCC BAA-935 / AF2122/97) GN=murG PE=3 SV=1	0	8.43257	9.7561	2	2	2	1	410	41.832	10.02	5.90319	2
FALSE	High	Master Protein	A0A083W2Y0	Transcriptional regulator MraZ OS=Mycobacterium bovis GN=mraZ PE=3 SV=1	0	8.39752	30.7692	3	3	3	1	143	15.902	6.54	6.04972	3
FALSE	High	Master Protein	A0A0C7DHU7	Penicillin-binding protein OS=Mycobacterium bovis GN=BOVR_00270 PE=4 SV=1	0	8.39425	4.86027	2	2	2	1	823	86.213	6	4.24241	2
FALSE	High	Master Protein	A0A083WBE2	Histidinol-phosphate aminotransferase OS=Mycobacterium bovis GN=hisC PE=3 SV=1	0	8.37048	17.8947	4	4	4	1	380	40.556	5.44	8.00706	4
FALSE	High	Master Protein	A0A0H3MBR3	Uncharacterized protein OS=Mycobacterium bovis (strain BCG / Pasteur 1173P2) GN=BCG_2116c PE=4 SV=1	0	8.28526	15.3614	3	4	3	1	332	35.279	5.87	5.51496	3
FALSE	High	Master Protein	A0A0H3MFL9	Probable nad-dependent glutamate dehydrogenase gdh OS=Mycobacterium bovis (strain BCG / Pasteur 1173P2) GN=gdh PE=4 SV=1	0	8.27666	4.62107	4	4	4	1	1623	176.689	5.83	3.81786	4
FALSE	High	Master Protein	A0A0C7DGA1	Uridylate kinase OS=Mycobacterium bovis GN=pyrH PE=3 SV=1	0	8.26465	14.652	2	2	2	1	273	28.821	5.99	6.37986	2
FALSE	High	Master Protein	A0A0H3M4N2	Uncharacterized protein OS=Mycobacterium bovis (strain BCG / Pasteur 1173P2) GN=BCG_1793c PE=4 SV=1	0	8.24314	11.0124	4	4	4	1	563	60.543	9.54	8.78133	4
FALSE	High	Master Protein	A0A0M3TQ22	Hydrolase OS=Mycobacterium bovis GN=BOVR_19665 PE=4 SV=1	0	8.24213	14.6988	4	4	4	1	415	45.245	8.46	6.61909	4
FALSE	High	Master Protein	A0A0H3M4V5	Probable inosine-5'-monophosphate dehydrogenase guaB1 OS=Mycobacterium bovis (strain BCG / Pasteur 1173P2) GN=guaB1 PE=4 SV=1	0	8.241	12.3173	3	3	3	1	479	49.934	6.35	5.24701	3
FALSE	High	Master Protein	Q7TVQ7	Putative S-adenosyl-L-methionine-dependent methyltransferase Mb3793c OS=Mycobacterium bovis (strain ATCC BAA-935 / AF2122/97) GN=Mb3793c PE=3 SV=1	0	8.22211	14.9682	3	3	2	1	314	34.734	5.11	7.61399	3
FALSE	High	Master Protein	A0A0K2HYH1	Uncharacterized protein OS=Mycobacterium bovis BCG GN=RN06_3093 PE=4 SV=1	0	8.21737	9.81013	2	2	2	1	316	34.805	9.19	2.58786	2
FALSE	High	Master Protein	A0A083WKU7	Endopeptidase, peptidase family M13 (Probable zin c metalloprotease Zmp1) OS=Mycobacterium bovis GN=BOVR_01050 PE=4 SV=1	0	8.20175	7.08899	2	2	2	1	663	73.868	5.25	5.52672	2
FALSE	High	Master Protein	A0A0H3P956	PROBABLE CHROMOSOME PARTITIONING PROTEIN PARA OS=Mycobacterium bovis (strain ATCC BAA-935 / AF2122/97) GN=parA PE=4 SV=1	0	8.20146	12.3919	3	3	3	1	347	37.525	6.33	5.2148	3
FALSE	High	Master Protein	A0A0H3P2C2	Conserved protein OS=Mycobacterium bovis (strain ATCC BAA-935 / AF2122/97) GN=Mb0321 PE=4 SV=1	0	8.18464	36.7188	2	2	2	1	128	13.94	4.59	6.12652	2
FALSE	High	Master Protein	A0A083WB19	Fe-S cluster assembly protein SufD OS=Mycobacterium bovis GN=BOVR_07765 PE=4 SV=1	0	8.14599	12.5945	2	3	2	1	397	42.498	5.27	2.90521	2
FALSE	High	Master Protein	A0A0H3M6S0	Possible short-chain dehydrogenase EphD OS=Mycobacterium bovis (strain BCG / Pasteur 1173P2) GN=ephD PE=4 SV=1	0	8.09215	4.56081	2	2	2	1	592	63.99	8.56	3.39663	2
FALSE	High	Master Protein	A0A0H3M507	Uncharacterized protein OS=Mycobacterium bovis (strain BCG / Pasteur 1173P2) GN=BCG_1566 PE=4 SV=1	0	8.07449	17.7258	3	3	3	1	299	33.391	5.43	4.62714	3
FALSE	High	Master Protein	A0A0C7DN59	Uncharacterized protein OS=Mycobacterium bovis GN=MBO1_02782 PE=4 SV=1	0	8.05824	16.25	3	3	3	1	240	25.283	5.6	5.97558	3
FALSE	High	Master Protein	A0A0D1PVH6	Acyl-CoA thioesterase OS=Mycobacterium bovis GN=BOVR_08420 PE=4 SV=1	0	8.05388	14.3791	2	4	2	1	306	33.757	6.54	2.08435	2
FALSE	High	Master Protein	A0A0H3MCT9	Probable bacterioferritin comigratory protein bcp OS=Mycobacterium bovis (strain BCG / Pasteur 1173P2) GN=bcp PE=4 SV=1	0	8.03671	45.8599	4	5	4	1	157	17.067	8.41	9.9254	4
FALSE	High	Master Protein	A0A083W4K4	Universal stress protein Rv2005c/MT2061 (USP Rv20 05c) OS=Mycobacterium bovis GN=BOVR_10370 PE=3 SV=1	0	8.01901	15.9322	3	3	3	1	295	30.966	5.82	6.19849	3
FALSE	High	Master Protein	A0A0C7DQ77	30S ribosomal protein S8 OS=Mycobacterium bovis GN=rpsH PE=3 SV=1	0	8.00422	29.6296	3	5	3	1	135	14.684	8.54	2.85319	3
FALSE	High	Master Protein	Q7TXG2	Glutamyl-tRNA(Gln) amidotransferase subunit A OS=Mycobacterium bovis (strain ATCC BAA-935 / AF2122/97) GN=gatA PE=3 SV=1	0	7.95184	5.26316	2	2	2	1	494	51.404	5.1	5.03423	2
FALSE	High	Master Protein	A0A0C7DSG0	Transcriptional regulator, ArsR family OS=Mycobacterium bovis GN=MBO1_00917 PE=4 SV=1	0	7.93381	32.5926	3	3	3	1	135	14.379	6.87	7.02903	3
FALSE	High	Master Protein	A0A0H3P3J4	Uncharacterized protein OS=Mycobacterium bovis (strain ATCC BAA-935 / AF2122/97) GN=Mb2061 PE=4 SV=1	0	7.91266	14.8148	2	2	2	1	162	18.503	6.43	4.87094	2
FALSE	High	Master Protein	A0A0H3M1K2	Probable o-methyltransferase OS=Mycobacterium bovis (strain BCG / Pasteur 1173P2) GN=BCG_0224 PE=4 SV=1	0	7.91136	17.2727	2	2	2	1	220	23.111	5.14	6.29951	2
FALSE	High	Master Protein	A0A083W2F8	Uncharacterized protein Rv2242/MT2302 OS=Mycobacterium bovis GN=MBO1_01623 PE=4 SV=1	0	7.90384	13.0435	4	4	4	1	414	44.61	5.6	6.66017	4
FALSE	High	Master Protein	A0A120IPU7	Alanine-rich transferase OS=Mycobacterium bovis BCG GN=RN06_3314 PE=4 SV=1	0	7.85253	23.6957	4	4	4	1	460	47.794	6.86	5.87591	4
FALSE	High	Master Protein	A0A083WCJ5	Glucose-6-phosphate 1-dehydrogenase OS=Mycobacterium bovis GN=zwf PE=3 SV=1	0	7.80447	10.7004	3	3	3	1	514	57.307	5.76	2.5828	3
FALSE	High	Master Protein	A0A0H3P1T5	PROBABLE TRANSCRIPTIONAL REGULATORY PROTEIN OS=Mycobacterium bovis (strain ATCC BAA-935 / AF2122/97) GN=Mb0484 PE=4 SV=1	0	7.78375	27.1429	4	4	4	1	140	15.355	5.35	6.5597	4
FALSE	High	Master Protein	A0A120IQ30	Glycerol-3-phosphate dehydrogenase [NAD(P)+] OS=Mycobacterium bovis BCG GN=gpsA PE=3 SV=1	0	7.78282	20.9581	3	3	3	1	334	33.945	5.67	7.39519	3
FALSE	High	Master Protein	A0A0K2HS77	Uncharacterized protein OS=Mycobacterium bovis BCG GN=RN06_0650 PE=4 SV=1	0	7.75486	10.8911	2	4	2	1	202	22.198	6.73	9.86241	2
FALSE	High	Master Protein	A0A0C7DMG5	Uncharacterized protein OS=Mycobacterium bovis GN=MBO_300473 PE=4 SV=1	0	7.72396	13.1343	2	2	2	1	335	36.709	6.01	3.54679	2
FALSE	High	Master Protein	A0A0M3TP21	NADH dehydrogenase OS=Mycobacterium bovis GN=BOVR_09635 PE=4 SV=1	0	7.69163	14.2549	3	3	3	1	463	49.687	9.36	5.65461	3
FALSE	High	Master Protein	A0A0H3MBJ7	Uncharacterized protein OS=Mycobacterium bovis (strain BCG / Pasteur 1173P2) GN=TB11.2 PE=4 SV=1	0	7.68702	66.6667	3	3	3	1	105	11.178	6.37	2.15564	3
FALSE	High	Master Protein	A0A0H3M893	Putative two component sensor histidine kinase senX3 OS=Mycobacterium bovis (strain BCG / Pasteur 1173P2) GN=senX3 PE=4 SV=1	0	7.67293	9.26829	2	2	2	1	410	44.737	6.48	5.21778	2
FALSE	High	Master Protein	A0A0C7DQ88	Oxidoreductase, short-chain dehydrogenase/reducta se family OS=Mycobacterium bovis GN=MBO1_02276 PE=3 SV=1	0	7.66073	14.2384	3	4	3	1	302	32.608	10.58	8.88484	3
FALSE	High	Master Protein	A0A0H3M9V9	Probable transcriptional regulatory protein (Possibly tetR-family) OS=Mycobacterium bovis (strain BCG / Pasteur 1173P2) GN=BCG_0180 PE=4 SV=1	0	7.65888	20.7143	3	3	3	1	280	30.624	8.47	4.50992	3
FALSE	High	Master Protein	P63908	Adenosine deaminase OS=Mycobacterium bovis (strain ATCC BAA-935 / AF2122/97) GN=add PE=3 SV=1	0	7.6488	10.137	2	2	2	1	365	39.718	5.62	3.80178	2
FALSE	High	Master Protein	A0A0H3MD60	Conserved hypothetical alanine and glycine and valine rich protein OS=Mycobacterium bovis (strain BCG / Pasteur 1173P2) GN=BCG_2709c PE=4 SV=1	0	7.64875	10.4247	2	2	2	1	259	27.199	5.53	4.96331	2
FALSE	High	Master Protein	A0A0K2HZE9	Ribosome maturation factor RimP OS=Mycobacterium bovis BCG GN=rimP PE=3 SV=1	0	7.62764	34.9727	3	3	3	1	183	19.553	5.48	5.02045	3
FALSE	High	Master Protein	A0A0H3P5G3	Polyphosphate kinase ppk2 (Polyphosphoric acid kinase) OS=Mycobacterium bovis (strain ATCC BAA-935 / AF2122/97) GN=ppk2 PE=4 SV=1	0	7.60359	9.49153	3	3	3	1	295	34.103	9.54	6.93319	3
FALSE	High	Master Protein	A0A0C7DD05	Uncharacterized protein OS=Mycobacterium bovis GN=MBO1_00618 PE=4 SV=1	0	7.57642	24.3728	4	4	4	1	279	30.456	9.88	6.28957	4
FALSE	High	Master Protein	A0A0H3MDH4	Possible chalcone synthase pks10 OS=Mycobacterium bovis (strain BCG / Pasteur 1173P2) GN=pks10 PE=4 SV=1	0	7.54935	15.864	3	3	3	1	353	37.122	5.4	5.5102	3
FALSE	High	Master Protein	A0A083WBD9	Uncharacterized protein OS=Mycobacterium bovis GN=MBO1_03388 PE=4 SV=1	0	7.54666	10.3175	2	2	2	1	252	28.003	6.01	5.87521	2
FALSE	High	Master Protein	A0A0H3P3X0	Chorismate mutase OS=Mycobacterium bovis (strain ATCC BAA-935 / AF2122/97) GN=Mb1917c PE=4 SV=1	0	7.53585	25.6281	3	3	3	1	199	21.931	5.64	8.13303	3
FALSE	High	Master Protein	A0A0C7DNB8	2-phospho-L-lactate guanylyltransferase OS=Mycobacterium bovis GN=cofC PE=3 SV=1	0	7.52264	33.6283	2	2	2	1	226	23.413	5.85	7.60163	2
FALSE	High	Master Protein	P64898	Uncharacterized protein Mb1858 OS=Mycobacterium bovis (strain ATCC BAA-935 / AF2122/97) GN=Mb1858 PE=1 SV=1	0	7.48454	40.7407	3	3	3	1	162	17.24	4.48	9.04853	3
FALSE	High	Master Protein	A0A083VU19	Conserved hypothetical Mce associated protein OS=Mycobacterium bovis GN=BOVR_18230 PE=4 SV=1	0	7.48144	18.75	2	4	2	1	160	17.995	9.38	6.59602	2
FALSE	High	Master Protein	A0A0H3MCP9	Probable oxidoreductase OS=Mycobacterium bovis (strain BCG / Pasteur 1173P2) GN=BCG_1422 PE=4 SV=1	0	7.44818	6.76471	2	4	2	1	340	37.228	6.86	7.34858	2
FALSE	High	Master Protein	A0A0H3M5Z7	Uncharacterized protein OS=Mycobacterium bovis (strain BCG / Pasteur 1173P2) GN=BCG_2321 PE=4 SV=1	0	7.44356	8.15851	2	4	2	1	429	46.153	5.81	3.54537	2
FALSE	High	Master Protein	A0A0H4XZD6	Oxidoreductase OS=Mycobacterium bovis GN=BOVR_16870 PE=4 SV=1	0	7.42152	16.6667	3	3	3	1	474	52.749	9.22	0	3
FALSE	High	Master Protein	A0A0C7DI04	Uncharacterized protein OS=Mycobacterium bovis GN=MBO1_03354 PE=4 SV=1	0	7.41751	6.31579	2	2	2	1	285	30.698	10.05	3.59222	2
FALSE	High	Master Protein	A0A0H4FYZ5	Succinate dehydrogenase iron-sulfur protein subunit OS=Mycobacterium bovis BCG GN=RN06_4049 PE=4 SV=1	0	7.40339	22.8137	3	3	3	1	263	29.33	7.47	3.88979	3
FALSE	High	Master Protein	A0A0C7DD74	DNA-binding protein OS=Mycobacterium bovis GN=MBO1_01553 PE=4 SV=1	0	7.39126	29.8701	3	3	3	1	154	16.637	8.65	6.84958	3
FALSE	High	Master Protein	A0A0H3M744	Uncharacterized protein OS=Mycobacterium bovis (strain BCG / Pasteur 1173P2) GN=BCG_1907c PE=4 SV=1	0	7.38908	40.3101	3	3	3	1	129	14.672	11.18	4.90606	3
FALSE	High	Master Protein	A0A0C7DMF1	Transcriptional regulator, TetR family OS=Mycobacterium bovis GN=MBO1_02590 PE=4 SV=1	0	7.38002	19.8312	3	3	3	1	237	25.952	5.5	5.03895	3
FALSE	High	Master Protein	A0A083WFC9	Conserved protein OS=Mycobacterium bovis GN=BOVR_04520 PE=4 SV=1	0	7.37934	16.3265	2	2	2	1	147	16.335	5.22	4.81005	2
FALSE	High	Master Protein	A0A0K2HXZ2	Amidase OS=Mycobacterium bovis BCG GN=RN06_2891 PE=3 SV=1	0	7.37874	17.562	3	3	3	1	484	50.852	7.61	2.18939	3
FALSE	High	Master Protein	A0A0C7DMT2	Soluble secreted antigen MPT53 OS=Mycobacterium bovis GN=MBO1_01166 PE=4 SV=1	0	7.37075	29.9435	3	4	3	1	177	18.844	6.61	5.70138	3
FALSE	High	Master Protein	A0A0C7DGF2	Chorismate pyruvate lyase OS=Mycobacterium bovis GN=MBO1_02715 PE=4 SV=1	0	7.36271	29.902	3	4	3	1	204	23.189	9.11	7.35929	3
FALSE	High	Master Protein	A0A0H3M8T0	Possible transmembrane phospholipid biosynthesis bifunctionnal enzyme plsC: putative l-3-phosphoserine phosphatase + 1-ACYL-SN-GLYCEROL-3-PHOSPHATE ACYLTRANSFERASE OS=Mycobacterium bovis (strain BCG / Pasteur 1173P2) GN=plsC PE=4 SV=1	0	7.33316	12.7586	4	5	4	1	580	61.704	9.64	8.73214	4
FALSE	High	Master Protein	A0A0H3MAY7	Segregation and condensation protein B OS=Mycobacterium bovis (strain BCG / Pasteur 1173P2) GN=BCG_1749 PE=3 SV=1	0	7.32005	38.0952	4	5	4	1	231	25.261	4.64	4.59029	4
FALSE	High	Master Protein	P66640	30S ribosomal protein S9 OS=Mycobacterium bovis (strain ATCC BAA-935 / AF2122/97) GN=rpsI PE=3 SV=1	0	7.30601	29.8013	2	3	2	1	151	16.426	10.67	4.18999	2
FALSE	High	Master Protein	A0A0H4FW38	Uncharacterized protein OS=Mycobacterium bovis BCG GN=RN06_3886 PE=4 SV=1	0	7.29829	48.4211	2	4	2	1	95	9.884	4.97	5.85356	2
FALSE	High	Master Protein	A0A083WCN5	Lipase OS=Mycobacterium bovis GN=BOVR_07435 PE=4 SV=1	0	7.29627	10.9375	2	2	2	1	320	34.031	5.05	6.92456	2
FALSE	High	Master Protein	A0A0K2HXG6	Uncharacterized protein OS=Mycobacterium bovis BCG GN=RN06_2705 PE=3 SV=1	0	7.24898	44.9153	3	3	3	1	118	12.536	4.6	7.41691	3
FALSE	High	Master Protein	A0A083W561	Immunogenic protein MPB63 OS=Mycobacterium bovis GN=BOVR_10000 PE=4 SV=1	0	7.24765	27.673	2	2	2	1	159	16.504	5.06	5.75791	2
FALSE	High	Master Protein	A0A0H3M3I2	Uncharacterized protein OS=Mycobacterium bovis (strain BCG / Pasteur 1173P2) GN=BCG_1324 PE=4 SV=1	0	7.17827	10.177	2	2	2	1	226	25.214	7.62	2.80178	2
FALSE	High	Master Protein	A0A0C7DMA8	Uncharacterized protein OS=Mycobacterium bovis GN=MBO1_03144 PE=4 SV=1	0	7.16031	18.3962	2	2	2	1	212	23.394	5.44	2.94922	2
FALSE	High	Master Protein	A0A0Y1B348	Mce family protein Mce1D OS=Mycobacterium bovis BCG GN=RN06_0217 PE=4 SV=1	0	7.15724	10.2941	3	3	3	1	612	65.515	6.7	5.3254	3
FALSE	High	Master Protein	A0A0H3MB98	Uncharacterized protein OS=Mycobacterium bovis (strain BCG / Pasteur 1173P2) GN=BCG_1906c PE=4 SV=1	0	7.12748	13.964	2	2	2	1	222	24.323	10.14	5.22316	2
FALSE	High	Master Protein	A0A0M5LD87	DNA primase OS=Mycobacterium bovis GN=dnaG PE=3 SV=1	0	7.12667	10.6416	3	3	3	1	639	69.648	6.96	7.21389	3
FALSE	High	Master Protein	A0A083W0K0	Carboxymethylenebutenolidase, putative (EC 3.1.1. 45) (Probable alanine rich hydrolase) OS=Mycobacterium bovis GN=MBO1_01414 PE=4 SV=1	0	7.12246	13.8776	2	4	2	1	245	26.143	5.31	7.16201	2
FALSE	High	Master Protein	A0A0H3P791	PROBABLE ENOYL-COA HYDRATASE ECHA16 (ENOYL HYDRASE) (UNSATURATED ACYL-COA HYDRATASE) (CROTONASE) OS=Mycobacterium bovis (strain ATCC BAA-935 / AF2122/97) GN=echA16 PE=4 SV=1	0	7.10047	20.8835	3	3	3	1	249	26.561	5.92	7.38461	3
FALSE	High	Master Protein	A0A083VW80	Conserved alanine valine rich protein OS=Mycobacterium bovis GN=MBO1_03055 PE=4 SV=1	0	7.09637	10.8108	2	2	2	1	407	42.452	8.68	4.71346	2
FALSE	High	Master Protein	A0A0H4XT76	DNA or RNA helicase of superfamily II OS=Mycobacterium bovis GN=BOVR_06285 PE=4 SV=1	0	7.04704	4.79233	3	4	3	1	939	100.611	7.88	6.70672	3
FALSE	High	Master Protein	A0A0Y1BT87	S-adenosylmethionine-dependent methyltransferase OS=Mycobacterium bovis BCG GN=RN06_0890 PE=3 SV=1	0	7.03748	10.2941	3	3	2	1	408	45.582	6.16	6.42687	3
FALSE	High	Master Protein	A0A0H3MAE8	Uncharacterized protein OS=Mycobacterium bovis (strain BCG / Pasteur 1173P2) GN=BCG_1548c PE=4 SV=1	0	7.03311	9.59752	2	2	2	1	323	33.478	5.34	5.54368	2
FALSE	High	Master Protein	A0A0H3P2B4	Esx conserved component ecce3. esx-3 type vii secretion system protein. probable transmembrane protein OS=Mycobacterium bovis (strain ATCC BAA-935 / AF2122/97) GN=ecce3 PE=4 SV=1	0	7.0221	14.1994	3	3	3	1	331	35.911	10.2	4.47435	3
FALSE	High	Master Protein	A0A0H3P2B8	PROBABLE DEHYDROGENASE/REDUCTASE OS=Mycobacterium bovis (strain ATCC BAA-935 / AF2122/97) GN=Mb0311 PE=4 SV=1	0	6.96111	11.5894	2	3	2	1	302	32.691	8.13	6.55821	2
FALSE	High	Master Protein	A0A0H3MGE6	Probable transcriptional repressor sirR OS=Mycobacterium bovis (strain BCG / Pasteur 1173P2) GN=sirR PE=4 SV=1	0	6.92745	10.5263	2	2	2	1	228	24.892	5.36	5.50166	2
FALSE	High	Master Protein	A0A0C7DH92	Uncharacterized protein OS=Mycobacterium bovis GN=MBO1_03109 PE=4 SV=1	0	6.92636	28.9655	3	3	3	1	145	15.567	9.52	4.53144	3
FALSE	High	Master Protein	A0A0C7DK57	Translation initiation factor IF-3 OS=Mycobacterium bovis GN=infC PE=3 SV=1	0	6.91716	22.973	3	3	3	1	222	24.235	9.76	4.63916	3
FALSE	High	Master Protein	A0A083W617	Geranylgeranyl pyrophosphate synthase OS=Mycobacterium bovis GN=BOVR_11245 PE=3 SV=1	0	6.90567	12.5	3	3	3	1	352	37.758	6.74	4.51681	3
FALSE	High	Master Protein	A0A0H3MF17	Probable exported protease OS=Mycobacterium bovis (strain BCG / Pasteur 1173P2) GN=BCG_2241c PE=4 SV=1	0	6.90354	11.9231	3	3	3	1	520	55.889	6.19	4.7895	3
FALSE	High	Master Protein	A0A083W7F6	DNA-directed DNA polymerase OS=Mycobacterium bovis GN=BOVR_08145 PE=3 SV=1	0	6.89653	5.23649	4	4	4	1	1184	129.242	5.81	2.33671	4
FALSE	High	Master Protein	A0A0H3MA26	UDP-N-acetylglucosamine 1-carboxyvinyltransferase OS=Mycobacterium bovis (strain BCG / Pasteur 1173P2) GN=murA PE=3 SV=1	0	6.88595	10.0478	2	2	2	1	418	44.035	5.54	5.44936	2
FALSE	High	Master Protein	P0A5V5	50S ribosomal protein L17 OS=Mycobacterium bovis (strain ATCC BAA-935 / AF2122/97) GN=rplQ PE=3 SV=1	0	6.88171	30	2	2	2	1	180	19.463	9.52	5.69713	2
FALSE	High	Master Protein	A0A0H3MG08	Uncharacterized protein OS=Mycobacterium bovis (strain BCG / Pasteur 1173P2) GN=BCG_2653c PE=4 SV=1	0	6.83164	25.1748	2	3	2	1	143	15.508	5.14	8.52852	2
FALSE	High	Master Protein	A0A109SA96	Tryptophan--tRNA ligase OS=Mycobacterium bovis BCG GN=trpS PE=3 SV=1	0	6.81226	8.49858	2	2	2	1	353	37.927	5.87	5.92987	2
FALSE	High	Master Protein	A0A0H3M9B8	Ribose-phosphate pyrophosphokinase OS=Mycobacterium bovis (strain BCG / Pasteur 1173P2) GN=prsA PE=3 SV=1	0	6.80355	21.7791	4	4	4	1	326	35.455	6.54	9.74648	4
FALSE	High	Master Protein	P64850	Uncharacterized protein Mb1454 OS=Mycobacterium bovis (strain ATCC BAA-935 / AF2122/97) GN=Mb1454 PE=3 SV=1	0	6.79649	36.3057	2	2	2	1	157	16.842	4.56	6.13563	2
FALSE	High	Master Protein	A0A083VRJ2	Cobyric acid synthase cobQ2 OS=Mycobacterium bovis GN=BOVR_19325 PE=4 SV=1	0	6.78809	14.0426	2	2	2	1	235	24.515	5.9	5.44246	2
FALSE	High	Master Protein	A0A0C7DBF2	S-adenosyl-L-methionine-dependent methyltransferase OS=Mycobacterium bovis GN=MBO1_00958 PE=3 SV=1	0	6.76346	10.1227	2	3	2	1	326	35.387	5.02	4.38047	2
FALSE	High	Master Protein	A0A093JZN0	30S ribosomal protein S30 OS=Mycobacterium bovis GN=BOVR_16805 PE=4 SV=1	0	6.73548	20.0913	3	3	3	1	219	25.078	8.95	5.30549	3
FALSE	High	Master Protein	A0A083W4U7	Uncharacterized protein OS=Mycobacterium bovis GN=BOVR_12345 PE=4 SV=1	0	6.73444	57.971	2	2	2	1	69	7.567	6.27	5.0144	2
FALSE	High	Master Protein	A0A0K2HX57	Membrane protein OS=Mycobacterium bovis BCG GN=RN06_2566 PE=4 SV=1	0	6.69658	17.623	3	3	3	1	244	26.004	6.09	7.01222	3
FALSE	High	Master Protein	A0A0C7DLB1	Uncharacterized protein OS=Mycobacterium bovis GN=MBO_300701 PE=4 SV=1	0	6.69585	14.5455	2	3	2	1	275	30.224	8.76	5.4751	2
FALSE	High	Master Protein	A0A0H3M451	Uncharacterized protein OS=Mycobacterium bovis (strain BCG / Pasteur 1173P2) GN=BCG_0682 PE=4 SV=1	0	6.66271	60.241	3	3	3	1	83	9.421	5.06	3.90693	3
FALSE	High	Master Protein	A0A0H3M187	Probable oxidoreductase OS=Mycobacterium bovis (strain BCG / Pasteur 1173P2) GN=BCG_0099 PE=3 SV=1	0	6.65086	9.57096	2	2	1	1	303	32.393	8.46	5.34973	2
FALSE	High	Master Protein	A0A0C7DSF3	Uncharacterized protein Rv1899c/MT1950 OS=Mycobacterium bovis GN=MBO1_03859 PE=4 SV=1	0	6.648	6.73854	2	2	2	1	371	37.972	10.98	5.18215	2
FALSE	High	Master Protein	A0A109S9Y0	ABC transporter ATP-binding protein OS=Mycobacterium bovis BCG GN=RN06_3865 PE=4 SV=1	0	6.64339	9.61969	2	2	2	1	447	49.091	7.34	5.00035	2
FALSE	High	Master Protein	A0A0H3MAA4	Uncharacterized protein OS=Mycobacterium bovis (strain BCG / Pasteur 1173P2) GN=BCG_0347c PE=4 SV=1	0	6.64054	17.5	2	2	2	1	160	17.171	7.34	2.87927	2
FALSE	High	Master Protein	A0A083WI16	50S ribosomal protein L16 OS=Mycobacterium bovis GN=rplP PE=3 SV=1	0	6.63264	29.7101	2	2	2	1	138	15.683	11.17	3.21708	2
FALSE	High	Master Protein	A0A0C7DLV0	Possible carboxylase OS=Mycobacterium bovis GN=MBO_300204 PE=4 SV=1	0	6.60939	8.2996	2	2	2	1	494	55.4	5.49	4.88494	2
FALSE	High	Master Protein	A0A083WDW9	Citrate synthase/methylcitrate synthase OS=Mycobacterium bovis GN=BOVR_04695 PE=3 SV=1	0	6.60592	5.63003	2	2	2	1	373	40.122	5.6	5.72929	2
FALSE	High	Master Protein	A0A0H3M6I8	UDP-N-acetylmuramoyl-tripeptide--D-alanyl-D-alanine ligase OS=Mycobacterium bovis (strain BCG / Pasteur 1173P2) GN=murF PE=3 SV=1	0	6.58359	8.23529	2	3	2	1	510	51.601	5.81	7.69301	2
FALSE	High	Master Protein	A0A0K2HSX2	Putative glutamate--cysteine ligase 2 OS=Mycobacterium bovis BCG GN=RN06_0537 PE=3 SV=1	0	6.57616	15.1436	3	3	3	1	383	42.936	5.92	4.75509	3
FALSE	High	Master Protein	A0A0C7DR55	Uncharacterized protein OS=Mycobacterium bovis GN=MBO1_00462 PE=4 SV=1	0	6.54767	9.54064	2	2	2	1	283	32.878	9.64	5.67934	2
FALSE	High	Master Protein	C1AL39	30S ribosomal protein S19 OS=Mycobacterium bovis (strain BCG / Tokyo 172 / ATCC 35737 / TMC 1019) GN=rpsS PE=3 SV=1	0	6.54561	25.8065	2	4	2	1	93	10.797	10.48	2.03252	2
FALSE	High	Master Protein	A0A0K2HXL2	Peroxiredoxin OS=Mycobacterium bovis BCG GN=RN06_2749 PE=4 SV=1	0	6.53822	13.7255	2	2	2	1	153	16.809	5.48	5.84132	2
FALSE	High	Master Protein	C1AL67	Adenylate kinase OS=Mycobacterium bovis (strain BCG / Tokyo 172 / ATCC 35737 / TMC 1019) GN=adk PE=3 SV=1	0	6.5313	14.9171	2	2	2	1	181	20.113	5.15	2.39281	2
FALSE	High	Master Protein	A0A0H3MAG8	Probable response regulator OS=Mycobacterium bovis (strain BCG / Pasteur 1173P2) GN=BCG_3166 PE=4 SV=1	0	6.52431	19.5489	2	2	2	1	133	14.377	6.3	5.803	2
FALSE	High	Master Protein	A1KG30	o-succinylbenzoate synthase OS=Mycobacterium bovis (strain BCG / Pasteur 1173P2) GN=menC PE=3 SV=1	0	6.50709	11.9632	2	3	2	1	326	33.954	4.97	5.75728	2
FALSE	High	Master Protein	A0A0H3M9Y7	Probable conserved mce associated transmembrane protein OS=Mycobacterium bovis (strain BCG / Pasteur 1173P2) GN=BCG_0213 PE=4 SV=1	0	6.50338	6.52174	2	2	2	1	322	35.331	10.71	3.26981	2
FALSE	High	Master Protein	A0A0K2HXU1	Uncharacterized protein OS=Mycobacterium bovis BCG GN=RN06_2843 PE=4 SV=1	0	6.49879	8.71287	2	2	2	1	505	54.544	5.15	3.20051	2
FALSE	High	Master Protein	A0A0H3P7E0	PROBABLE SHORT CHAIN ALCOHOL DEHYDROGENASE/REDUCTASE OS=Mycobacterium bovis (strain ATCC BAA-935 / AF2122/97) GN=Mb3083c PE=3 SV=1	0	6.49697	16.0279	2	2	2	1	287	31.134	9.66	6.50794	2
FALSE	High	Master Protein	A0A0H3P2N7	POSSIBLE LONG-CHAIN-FATTY-ACID--COA LIGASE FADD12 (FATTY-ACID-COA SYNTHETASE) (FATTY-ACID-COA SYNTHASE) OS=Mycobacterium bovis (strain ATCC BAA-935 / AF2122/97) GN=fadD12 PE=4 SV=1	0	6.49141	10.6542	4	5	4	1	535	58.028	6.61	6.73693	4
FALSE	High	Master Protein	A0A083WA13	Glutamate racemase OS=Mycobacterium bovis GN=murI PE=3 SV=1	0	6.4646	16.9742	2	2	2	1	271	28.625	5.83	4.38055	2
FALSE	High	Master Protein	A0A0H3M9N2	Uncharacterized protein OS=Mycobacterium bovis (strain BCG / Pasteur 1173P2) GN=BCG_3720c PE=4 SV=1	0	6.44223	24.6094	3	3	3	1	256	26.384	6.95	2.54331	3
FALSE	High	Master Protein	A0A0H3MA90	Probable protease OS=Mycobacterium bovis (strain BCG / Pasteur 1173P2) GN=BCG_0331 PE=4 SV=1	0	6.4296	16.9197	4	4	4	1	461	46.099	5.54	1.82763	4
FALSE	High	Master Protein	A0A083WF22	Uncharacterized protein Rv0906/MT0929 OS=Mycobacterium bovis GN=MBO1_02017 PE=4 SV=1	0	6.42677	6.72043	2	2	2	1	372	40.616	6.57	2.0775	2
FALSE	High	Master Protein	A0A0C7DHH1	Lipoprotein LpqB OS=Mycobacterium bovis GN=lpqB PE=3 SV=1	0	6.41837	12.7768	3	5	3	1	587	61.611	5.49	4.99215	3
FALSE	High	Master Protein	A0A0C7DUB9	Carbonic anhydrase OS=Mycobacterium bovis GN=BOVR_18715 PE=3 SV=1	0	6.40781	14.4928	2	3	2	1	207	21.778	5.97	4.46973	2
FALSE	High	Master Protein	A0A0C7DEG6	Uncharacterized protein OS=Mycobacterium bovis GN=MBO1_02079 PE=4 SV=1	0	6.40351	14.3478	2	2	2	1	230	25.701	10.24	2.13568	2
FALSE	High	Master Protein	A0A0H3M7W2	Cell division protein FtsQ OS=Mycobacterium bovis (strain BCG / Pasteur 1173P2) GN=ftsQ PE=3 SV=1	0	6.3313	17.8344	3	3	3	1	314	33.913	6.6	2.29455	3
FALSE	High	Master Protein	A0A0H3MAF2	Uncharacterized protein OS=Mycobacterium bovis (strain BCG / Pasteur 1173P2) GN=BCG_1558 PE=4 SV=1	0	6.32451	30.4762	2	2	2	1	105	11.403	8.18	4.68116	2
FALSE	High	Master Protein	A0A0H3P231	Conserved protein OS=Mycobacterium bovis (strain ATCC BAA-935 / AF2122/97) GN=Mb0733 PE=4 SV=1	0	6.31996	9.699	2	2	2	1	299	32.723	6.1	1.89015	2
FALSE	High	Master Protein	A0A0C7DKF9	Nicotinate-nucleotide pyrophosphorylase (EC 2.4.2.19) OS=Mycobacterium bovis GN=MBO1_03387 PE=3 SV=1	0	6.2915	19.5122	2	2	2	1	287	30.178	5.17	2.92235	2
FALSE	High	Master Protein	A0A0C7DIH2	Serine/threonine-protein kinase PknE OS=Mycobacterium bovis GN=MBO1_03532 PE=4 SV=1	0	6.27479	8.48057	2	2	2	1	566	60.502	6.06	5.05737	2
FALSE	High	Master Protein	A0A0D1NPI9	Uncharacterized protein OS=Mycobacterium bovis GN=BOVR_03205 PE=4 SV=1	0	6.2591	6.08187	2	2	2	1	855	92.696	4.63	2.29698	2
FALSE	High	Master Protein	A0A0D1MH13	Conserved membrane protein OS=Mycobacterium bovis GN=BOVR_19835 PE=4 SV=1	0	6.25787	23.7288	2	3	2	1	177	18.474	11.71	5.49677	2
FALSE	High	Master Protein	A0A0H3P1F8	POSSIBLE FATTY-ACID-COA LIGASE FADD10 (FATTY-ACID-COA SYNTHETASE) (FATTY-ACID-COA SYNTHASE) OS=Mycobacterium bovis (strain ATCC BAA-935 / AF2122/97) GN=fadD10 PE=4 SV=1	0	6.25319	10.1852	2	2	2	1	540	56.554	5.19	2.73792	2
FALSE	High	Master Protein	A0A083VTD9	Uncharacterized protein OS=Mycobacterium bovis GN=BOVR_17830 PE=4 SV=1	0	6.23879	20.5128	3	3	3	1	234	26.498	5.91	4.14984	3
FALSE	High	Master Protein	A0A120IN71	Sulfatase OS=Mycobacterium bovis BCG GN=RN06_0374 PE=4 SV=1	0	6.23283	8.15603	3	3	3	1	564	62.199	6.81	4.56082	3
FALSE	High	Master Protein	A0A0H3M4H7	Threonine synthase OS=Mycobacterium bovis (strain BCG / Pasteur 1173P2) GN=thrC PE=3 SV=1	0	6.22839	13.3333	2	2	2	1	360	37.298	6.16	5.07849	2
FALSE	High	Master Protein	A0A0H4XUG3	Diacylglycerol O-acyltransferase OS=Mycobacterium bovis GN=BOVR_16770 PE=3 SV=1	0	6.22319	17.484	3	3	3	1	469	50.964	8.15	5.32745	3
FALSE	High	Master Protein	A0A0M5LHI1	UPF0182 protein BOVR_16530 OS=Mycobacterium bovis GN=BOVR_16530 PE=3 SV=1	0	6.19858	3.62903	2	3	2	1	992	107.408	8.9	2.66458	2
FALSE	High	Master Protein	A0A0G4DK69	Uncharacterized protein Rv2082 OS=Mycobacterium bovis GN=MBO_500250 PE=4 SV=1	0	6.19468	9.70874	3	3	3	1	721	73.576	6.65	2.18167	3
FALSE	High	Master Protein	A0A0H3P634	MCE-FAMILY PROTEIN MCE4B OS=Mycobacterium bovis (strain ATCC BAA-935 / AF2122/97) GN=mce4B PE=4 SV=1	0	6.17204	12.5714	2	2	2	1	350	36.858	7.97	2.44265	2
FALSE	High	Master Protein	A0A0H3MAX6	Uncharacterized protein OS=Mycobacterium bovis (strain BCG / Pasteur 1173P2) GN=BCG_0739c PE=4 SV=1	0	6.16996	17.765	3	4	3	1	349	38.107	6.71	4.49791	3
FALSE	High	Master Protein	A0A0C7DQP7	Metallo-beta-lactamase superfamily protein (Possi ble glyoxalase II (Hydroxyacylglutathione hydrolase) (GLX I I)) OS=Mycobacterium bovis GN=MBO_302332 PE=4 SV=1	0	6.15714	13.5021	2	2	2	1	237	25.922	5.11	3.15306	2
FALSE	High	Master Protein	A0A0Y1C3X9	Transcriptional regulator OS=Mycobacterium bovis BCG GN=RN06_0844 PE=4 SV=1	0	6.15499	11.9266	2	2	2	1	218	23.334	6.81	4.92662	2
FALSE	High	Master Protein	A0A0C7DUK1	Mur ligase family protein (Possible ligase) OS=Mycobacterium bovis GN=MBO_303105 PE=4 SV=1	0	6.14065	14.0436	3	3	3	1	413	43.369	6.76	7.59168	3
FALSE	High	Master Protein	A0A0H3P754	PROBABLE ACYL-CoA DEHYDROGENASE FADE1 OS=Mycobacterium bovis (strain ATCC BAA-935 / AF2122/97) GN=fadE1 PE=3 SV=1	0	6.13935	6.04027	2	2	2	1	447	50.192	7.75	4.69445	2
FALSE	High	Master Protein	A0A0C7DMC0	Ribonucleoside-diphosphate reductase OS=Mycobacterium bovis GN=MBO_301137 PE=3 SV=1	0	6.13616	5.7931	2	2	2	1	725	82.39	6.43	5.22477	2
FALSE	High	Master Protein	A0A120IQ47	TetR family transcriptional regulator OS=Mycobacterium bovis BCG GN=RN06_3984 PE=4 SV=1	0	6.13329	12.6087	2	2	2	1	230	25.836	5.67	5.23408	2
FALSE	High	Master Protein	A0A0H3P4J7	Conserved alanine rich protein OS=Mycobacterium bovis (strain ATCC BAA-935 / AF2122/97) GN=Mb2747c PE=4 SV=1	0	6.12088	10.3896	2	2	2	1	231	23.473	5.11	3.25932	2
FALSE	High	Master Protein	P64308	Non-canonical purine NTP pyrophosphatase OS=Mycobacterium bovis (strain ATCC BAA-935 / AF2122/97) GN=Mb1376 PE=3 SV=1	0	6.10023	37.2549	3	3	3	1	204	21.003	5.26	0	3
FALSE	High	Master Protein	A0A083WBP5	Monooxygenase OS=Mycobacterium bovis GN=BOVR_06060 PE=4 SV=1	0	6.09914	13.0178	2	2	2	1	338	36.323	10.13	5.50004	2
FALSE	High	Master Protein	A0A0C7DK42	Probable O-acetylhomoserine sulfhydrylase MetC (H omocysteine synthase) (O-acetylhomoserine (Thiol)-lyase) (O AH sulfhydrylase) (O-acetyl-L-homoserine sulfhydrylase) (Tr ansulfuration enzyme family pr... OS=Mycobacterium bovis GN=MBO1_03187 PE=3 SV=1	0	6.07028	14.0312	3	3	3	1	449	47.342	5.49	2.49443	3
FALSE	High	Master Protein	A0A0C7DSZ5	4-hydroxy-tetrahydrodipicolinate synthase OS=Mycobacterium bovis GN=dapA PE=3 SV=1	0	6.06594	16.6667	2	2	2	1	324	33.369	7.17	5.82756	2
FALSE	High	Master Protein	A0A0H3M6B6	RNA polymerase-binding protein RbpA OS=Mycobacterium bovis (strain BCG / Pasteur 1173P2) GN=rbpA PE=3 SV=1	0	6.05867	58.5586	3	3	3	1	111	12.964	5.64	3.01123	3
FALSE	High	Master Protein	A0A0H3P5J0	PROBABLE PROLINE DEHYDROGENASE OS=Mycobacterium bovis (strain ATCC BAA-935 / AF2122/97) GN=Mb1220 PE=4 SV=1	0	6.04086	16.4134	3	3	3	1	329	36.215	8.25	4.20237	3
FALSE	High	Master Protein	A0A083VRR3	Galactofuranosyl transferase OS=Mycobacterium bovis GN=BOVR_19710 PE=4 SV=1	0	5.99138	23.3553	3	3	3	1	304	33.843	9.04	4.16416	3
FALSE	High	Master Protein	A0A0H4Y8E6	Antitoxin OS=Mycobacterium bovis GN=BOVR_05925 PE=4 SV=1	0	5.9714	36.9231	2	2	2	1	65	6.969	11.18	5.81016	2
FALSE	High	Master Protein	A1KI94	ATP synthase subunit b OS=Mycobacterium bovis (strain BCG / Pasteur 1173P2) GN=atpF PE=3 SV=1	0	5.9443	15.7895	2	2	2	1	171	18.314	5.24	1.93288	2
FALSE	High	Master Protein	A0A0K2HY33	tRNA (Adenine(58)-N(1))-methyltransferase OS=Mycobacterium bovis BCG GN=RN06_2597 PE=4 SV=1	0	5.92764	12.1429	2	2	2	1	280	30.104	8.87	4.44418	2
FALSE	High	Master Protein	A0A083WL93	Conserved protein (Fructose-bisphosphate aldolase family protein) OS=Mycobacterium bovis GN=BOVR_01905 PE=4 SV=1	0	5.9194	11.7021	3	3	3	1	376	41.478	9.74	4.57034	3
FALSE	High	Master Protein	A0A0H3MDM8	Probable phosphatase OS=Mycobacterium bovis (strain BCG / Pasteur 1173P2) GN=BCG_1730 PE=4 SV=1	0	5.88223	10.7649	2	2	2	1	353	36.988	5.33	3.49588	2
FALSE	High	Master Protein	A0A083WF04	Uncharacterized protein OS=Mycobacterium bovis GN=BOVR_04690 PE=4 SV=1	0	5.84374	6.93878	2	2	2	1	490	52.002	5.19	5.37327	2
FALSE	High	Master Protein	Q7U140	Alpha-keto-acid decarboxylase OS=Mycobacterium bovis (strain ATCC BAA-935 / AF2122/97) GN=kdc PE=3 SV=1	0	5.84034	7.85714	2	2	2	1	560	59.746	5.41	4.04189	2
FALSE	High	Master Protein	A1KNE2	NADH-quinone oxidoreductase subunit B OS=Mycobacterium bovis (strain BCG / Pasteur 1173P2) GN=nuoB PE=3 SV=1	0	5.82958	15.7609	2	3	2	1	184	20.205	7.81	2.73506	2
FALSE	High	Master Protein	P59984	Uncharacterized lipoprotein Mb2616c OS=Mycobacterium bovis (strain ATCC BAA-935 / AF2122/97) GN=Mb2616c PE=3 SV=1	0	5.81918	7.54039	2	3	2	1	557	58.583	5.95	7.31286	2
FALSE	High	Master Protein	A0A0H3P3U9	POSSIBLE OXIDOREDUCTASE OS=Mycobacterium bovis (strain ATCC BAA-935 / AF2122/97) GN=Mb1887c PE=4 SV=1	0	5.81856	17.7778	3	3	3	1	225	23.195	5.92	5.94277	3
FALSE	High	Master Protein	A0A083WKK9	ESX-3 secretion system protein EccC3 (ESX conserv ed component C3) (Type VII secretion system protein EccC3) (T7SS protein EccC3) OS=Mycobacterium bovis GN=MBO1_00296 PE=4 SV=1	0	5.78461	2.93233	3	3	3	1	1330	145.139	6.54	3.77661	3
FALSE	High	Master Protein	A0A0K2HT17	50S ribosomal protein L18 OS=Mycobacterium bovis BCG GN=rplR PE=3 SV=1	0	5.78282	21.3115	2	2	2	1	122	13.176	11.6	5.2864	2
FALSE	High	Master Protein	A0A083W394	Carboxylesterase, putative (Probable esterase Lip M) OS=Mycobacterium bovis GN=BOVR_11825 PE=4 SV=1	0	5.76894	13.6891	3	3	3	1	431	46.652	9.32	4.45809	3
FALSE	High	Master Protein	A0A083WES8	Phosphoribosylamine--glycine ligase OS=Mycobacterium bovis GN=purD PE=3 SV=1	0	5.76654	8.29384	2	3	2	1	422	43.482	5.4	7.96146	2
FALSE	High	Master Protein	A0A0K2HYA9	Uncharacterized protein OS=Mycobacterium bovis BCG GN=RN06_3009 PE=4 SV=1	0	5.74687	19.8068	2	2	2	1	207	23.021	5.57	2.28709	2
FALSE	High	Master Protein	A0A0H3P5Z7	Probable penicillin-binding protein dacb1 (D-alanyl-d-alanine carboxypeptidase) (Dd-peptidase) (Dd-carboxypeptidase) (Pbp) (Dd-transpeptidase) (Serine-type d-ala-d-ala carboxypeptidase) (D-amino acid... OS=Mycobacterium bovis (strain ATCC BAA-935 / AF2122/97) GN=dacB1 PE=3 SV=1	0	5.74377	7.90123	2	2	2	1	405	41.656	6.28	4.69571	2
FALSE	High	Master Protein	A0A083WMU8	Uncharacterized protein OS=Mycobacterium bovis GN=BOVR_00165 PE=4 SV=1	0	5.73511	8.49315	2	2	2	1	365	39.543	7.85	2.80206	2
FALSE	High	Master Protein	A0A120IP54	Transcriptional repressor Mce3R OS=Mycobacterium bovis BCG GN=RN06_2432 PE=4 SV=1	0	5.73334	9.85222	2	3	2	1	406	44.315	8.66	4.76702	2
FALSE	High	Master Protein	A0A0H3P3Z5	Uncharacterized protein OS=Mycobacterium bovis (strain ATCC BAA-935 / AF2122/97) GN=Mb2024 PE=4 SV=1	0	5.70273	15.2	2	2	2	1	250	28.697	6.4	2.49835	2
FALSE	High	Master Protein	A0A0C7DNI1	Diaminopimelate decarboxylase OS=Mycobacterium bovis GN=lysA PE=3 SV=1	0	5.68604	6.4877	2	2	2	1	447	47.486	5.34	4.32542	2
FALSE	High	Master Protein	A0A0H4XYH9	50S ribosomal protein L28 OS=Mycobacterium bovis GN=rpmB PE=3 SV=1	0	5.6518	45.3125	3	4	3	1	64	6.9	10.98	9.20778	3
FALSE	High	Master Protein	A0A0K2HYC3	Glycerol-3-phosphate acyltransferase OS=Mycobacterium bovis BCG GN=plsB PE=3 SV=1	0	5.64861	7.60456	3	3	3	1	789	88.313	8.75	2.94903	3
FALSE	High	Master Protein	A0A083VPX4	N-acetylmuramoyl-L-alanine amidase OS=Mycobacterium bovis GN=BOVR_20340 PE=4 SV=1	0	5.58892	7.88177	2	2	2	1	406	43.884	6.86	4.51393	2
FALSE	High	Master Protein	A0A083VU40	Enoyl-CoA hydratase OS=Mycobacterium bovis GN=BOVR_17685 PE=3 SV=1	0	5.5759	13.1757	3	3	3	1	296	31.279	6.77	5.45213	3
FALSE	High	Master Protein	A0A0H3P3C1	Conserved protein OS=Mycobacterium bovis (strain ATCC BAA-935 / AF2122/97) GN=Mb1663c PE=4 SV=1	0	5.56119	10.9848	2	3	2	1	264	27.919	5.68	2.59332	2
FALSE	High	Master Protein	P80069	Alanine and proline-rich secreted protein Apa OS=Mycobacterium bovis (strain BCG / Pasteur 1173P2) GN=apa PE=1 SV=2	0	5.54268	16.6154	2	3	2	1	325	32.667	5.11	4.74676	2
FALSE	High	Master Protein	A0A0H3P834	PROBABLE SUGAR-BINDING LIPOPROTEIN LPQY OS=Mycobacterium bovis (strain ATCC BAA-935 / AF2122/97) GN=lpqY PE=4 SV=1	0	5.51826	8.11966	2	2	2	1	468	49.763	5.72	5.18696	2
FALSE	High	Master Protein	A0A083VXC3	Acetolactate synthase small subunit OS=Mycobacterium bovis GN=BOVR_15545 PE=4 SV=1	0	5.50201	23.2143	2	2	2	1	168	18.176	8.16	4.20039	2
FALSE	High	Master Protein	A0A0K2HT44	UPF0336 protein RN06_0620 OS=Mycobacterium bovis BCG GN=RN06_0620 PE=3 SV=1	0	5.49533	10.241	2	2	2	1	166	18.349	6.27	1.79537	2
FALSE	High	Master Protein	A0A0C7DRQ2	CDP-diacylglycerol pyrophosphatase OS=Mycobacterium bovis GN=cdh PE=3 SV=1	0	5.46918	14.8936	3	3	3	1	282	30.767	8.43	6.26513	3
FALSE	High	Master Protein	A0A093PMK8	Hydroxymethylpyrimidine/phosphomethylpyrimidine kinase OS=Mycobacterium bovis GN=BOVR_02195 PE=4 SV=1	0	5.46327	9.81818	2	2	2	1	275	28.547	5.73	2.67972	2
FALSE	High	Master Protein	A0A0H3M3B6	Possible GTP-binding translation elongation factor typA OS=Mycobacterium bovis (strain BCG / Pasteur 1173P2) GN=typA PE=4 SV=1	0	5.44006	6.84713	2	2	2	1	628	67.538	5.78	4.80102	2
FALSE	High	Master Protein	P64304	Haloalkane dehalogenase 2 OS=Mycobacterium bovis (strain ATCC BAA-935 / AF2122/97) GN=dhmA2 PE=3 SV=1	0	5.4303	12.2378	2	2	2	1	286	32.131	9.07	4.77188	2
FALSE	High	Master Protein	A0A109SAJ2	Amidase OS=Mycobacterium bovis BCG GN=RN06_4130 PE=3 SV=1	0	5.42287	4.80167	2	2	2	1	479	51.016	5.91	4.36762	2
FALSE	High	Master Protein	A0A0H3M383	Uncharacterized protein OS=Mycobacterium bovis (strain BCG / Pasteur 1173P2) GN=BCG_0891 PE=4 SV=1	0	5.38985	9.25926	2	2	2	1	270	29.622	6.06	2.47325	2
FALSE	High	Master Protein	A0A0H3M9T7	Probable DNA-3-methyladenine glycosylase i tagA OS=Mycobacterium bovis (strain BCG / Pasteur 1173P2) GN=tagA PE=4 SV=1	0	5.38421	9.80392	2	2	2	1	204	22.991	7.88	4.17866	2
FALSE	High	Master Protein	A0A0C7DIN5	NAD(P) transhydrogenase subunit beta OS=Mycobacterium bovis GN=MBO1_03608 PE=3 SV=1	0	5.36171	13.2632	3	3	3	1	475	48.827	6.54	5.79044	3
FALSE	High	Master Protein	A0A0C7DE15	Uncharacterized protein OS=Mycobacterium bovis GN=MBO1_02013 PE=4 SV=1	0	5.34861	42.0455	3	3	3	1	176	19.029	9.66	4.01578	3
FALSE	High	Master Protein	A0A0H4Y7C2	50S ribosomal protein L23 OS=Mycobacterium bovis GN=rplW PE=3 SV=1	0	5.31628	30	2	2	2	1	100	10.951	10.48	5.92684	2
FALSE	High	Master Protein	A0A0H3P3S2	Uncharacterized protein OS=Mycobacterium bovis (strain ATCC BAA-935 / AF2122/97) GN=Mb1804 PE=4 SV=1	0	5.30879	10.2941	2	2	2	1	272	29.732	5.97	1.95402	2
FALSE	High	Master Protein	A0A0C7D9B0	tRNA (guanine-N(7)-)-methyltransferase OS=Mycobacterium bovis GN=trmB PE=3 SV=1	0	5.30699	12.5874	2	2	2	1	286	31.215	10.04	2.20452	2
FALSE	High	Master Protein	A0A083WH64	F420-dependent glucose-6-phosphate dehydrogenase OS=Mycobacterium bovis GN=fgd PE=3 SV=1	0	5.30149	18.4524	3	4	3	1	336	36.966	5.47	8.86898	3
FALSE	High	Master Protein	A0A0C7DT08	Prephenate dehydratase OS=Mycobacterium bovis GN=pheA PE=4 SV=1	0	5.28403	9.28793	2	2	2	1	323	33.799	5.41	3.83161	2
FALSE	High	Master Protein	A0A0H3P7K6	Gcn5-related n-acetyltransferase, phosphorylase OS=Mycobacterium bovis (strain ATCC BAA-935 / AF2122/97) GN=Mb3254c PE=4 SV=1	0	5.28069	8.22785	2	2	2	1	474	51.269	5.57	4.51983	2
FALSE	High	Master Protein	A0A083W6U7	GTPase Der OS=Mycobacterium bovis GN=engA PE=3 SV=1	0	5.2759	7.99136	2	3	2	1	463	49.927	7.61	5.03179	2
FALSE	High	Master Protein	A1KIS5	Ferrochelatase OS=Mycobacterium bovis (strain BCG / Pasteur 1173P2) GN=hemH PE=3 SV=1	0	5.26565	16.5698	2	3	2	1	344	37.121	6.05	4.79345	2
FALSE	High	Master Protein	A0A083W579	Conserved protein OS=Mycobacterium bovis GN=MBO1_01098 PE=4 SV=1	0	5.2518	16.3265	2	2	2	1	196	20.782	4.78	5.07228	2
FALSE	High	Master Protein	A0A0H4Y740	Glycerol-3-phosphate dehydrogenase [NAD(P)+] OS=Mycobacterium bovis GN=gpsA PE=3 SV=1	0	5.2442	15.0997	3	3	3	1	351	37.178	7.53	6.81493	3
FALSE	High	Master Protein	A0A0H3M9W0	Probable sugar-transport ATP-binding protein ABC transporter sugC OS=Mycobacterium bovis (strain BCG / Pasteur 1173P2) GN=sugC PE=3 SV=1	0	5.23567	9.41476	2	2	2	1	393	42.888	6.11	4.03821	2
FALSE	High	Master Protein	A0A0K2HQX9	Oxidative stress response regulatory protein OxyS OS=Mycobacterium bovis BCG GN=RN06_0148 PE=4 SV=1	0	5.21297	11.7834	3	3	3	1	314	34.202	6.04	4.10335	3
FALSE	High	Master Protein	A0A083W435	Gamma-glutamyl phosphate reductase OS=Mycobacterium bovis GN=proA PE=3 SV=1	0	5.20194	8.91566	2	2	2	1	415	43.718	6.04	4.86428	2
FALSE	High	Master Protein	A0A0C7DJN6	Uncharacterized protein OS=Mycobacterium bovis GN=MBO1_02828 PE=4 SV=1	0	5.18959	16.9291	2	2	2	1	254	28.095	4.98	1.80349	2
FALSE	High	Master Protein	A0A093JK57	Growth inhibitor PemK OS=Mycobacterium bovis GN=BOVR_12460 PE=4 SV=1	0	5.18938	14.5	2	2	2	1	200	22.503	9.19	4.61881	2
FALSE	High	Master Protein	A0A0M5LA86	Serine/threonine protein kinase OS=Mycobacterium bovis GN=BOVR_06710 PE=3 SV=1	0	5.18859	13.5906	3	3	3	1	596	63.69	6.1	2.83456	3
FALSE	High	Master Protein	A1KN98	SsrA-binding protein OS=Mycobacterium bovis (strain BCG / Pasteur 1173P2) GN=smpB PE=3 SV=1	0	5.17453	40	3	3	3	1	160	18.219	10.71	4.97231	3
FALSE	High	Master Protein	A0A0H3M4G7	Amidophosphoribosyltransferase OS=Mycobacterium bovis (strain BCG / Pasteur 1173P2) GN=purF PE=3 SV=1	0	5.14809	11.575	3	3	3	1	527	56.127	5.4	2.22657	3
FALSE	High	Master Protein	A0A0Y1D0N4	Uncharacterized protein OS=Mycobacterium bovis BCG GN=RN06_3353 PE=4 SV=1	0	5.12207	10.8974	2	2	2	1	312	34.498	9.42	2.4132	2
FALSE	High	Master Protein	A0A0H4Y9V5	Radical SAM protein OS=Mycobacterium bovis GN=BOVR_08740 PE=4 SV=1	0	5.12199	8.45921	2	2	2	1	331	35.447	6.24	4.39159	2
FALSE	High	Master Protein	A0A0M3TN93	TetR family transcriptional regulator OS=Mycobacterium bovis GN=BOVR_01445 PE=4 SV=1	0	5.10635	15.1639	2	2	2	1	244	26.36	9.29	4.03143	2
FALSE	High	Master Protein	P0A4Z3	Shikimate kinase OS=Mycobacterium bovis (strain ATCC BAA-935 / AF2122/97) GN=aroK PE=3 SV=1	0	5.10095	22.1591	2	2	2	1	176	18.572	10.56	2.89443	2
FALSE	High	Master Protein	A0A083W2S9	2-oxoisovalerate dehydrogenase OS=Mycobacterium bovis GN=BOVR_12955 PE=4 SV=1	0	5.09372	8.90805	2	2	2	1	348	38.07	5.35	2.25621	2
FALSE	High	Master Protein	A0A109S844	Uncharacterized protein OS=Mycobacterium bovis BCG GN=RN06_2521 PE=4 SV=1	0	5.0909	7.02247	2	2	2	1	712	74.187	5.63	2.16931	2
FALSE	High	Master Protein	A0A083WIM3	5-oxoprolinase OS=Mycobacterium bovis GN=BOVR_01400 PE=4 SV=1	0	5.05274	2.89495	3	3	3	1	1209	129.57	6.38	3.70901	3
FALSE	High	Master Protein	A0A0K2HTQ5	50S ribosomal protein L2 OS=Mycobacterium bovis BCG GN=rplB PE=3 SV=1	0	5.03297	21.7857	3	4	3	1	280	30.558	11.39	4.54145	3
FALSE	High	Master Protein	A0A0H3M2K3	Probable elongation factor g fusA2b [second part] OS=Mycobacterium bovis (strain BCG / Pasteur 1173P2) GN=fusA2b PE=4 SV=1	0	4.99805	5.32213	2	2	2	1	714	75.587	5.07	4.78892	2
FALSE	High	Master Protein	A0A0G2Q9K8	Probable two component sensor kinase OS=Mycobacterium bovis (strain BCG / Pasteur 1173P2) GN=BCG_3247c PE=4 SV=1	0	4.98904	6.78643	2	2	2	1	501	53.978	5.88	1.76604	2
FALSE	High	Master Protein	C1AIV9	Putative 4-hydroxy-4-methyl-2-oxoglutarate aldolase OS=Mycobacterium bovis (strain BCG / Tokyo 172 / ATCC 35737 / TMC 1019) GN=JTY_3918 PE=3 SV=1	0	4.98457	11.465	2	2	2	1	157	16.225	5.27	4.14965	2
FALSE	High	Master Protein	A0A0C7DCL8	Transcriptional repressor NrdR OS=Mycobacterium bovis GN=nrdR PE=3 SV=1	0	4.96982	16.8675	3	3	3	1	166	18.295	7.37	0	3
FALSE	High	Master Protein	G7QWW8	NADH-quinone oxidoreductase subunit C OS=Mycobacterium bovis BCG str. Mexico GN=nuoC PE=3 SV=1	0	4.96144	11.8644	2	3	2	1	236	26.915	5.63	4.41456	2
FALSE	High	Master Protein	A0A0H3M6R4	4-aminobutyrate aminotransferase gabT OS=Mycobacterium bovis (strain BCG / Pasteur 1173P2) GN=gabT PE=3 SV=1	0	4.95713	6.68151	2	2	2	1	449	46.783	5.59	2.30729	2
FALSE	High	Master Protein	Q7U055	Carbamoyl-phosphate synthase small chain OS=Mycobacterium bovis (strain ATCC BAA-935 / AF2122/97) GN=carA PE=3 SV=1	0	4.95326	12.5	2	2	2	1	376	39.728	6.33	1.82563	2
FALSE	High	Master Protein	A0A0K2HY07	ATP-dependent DNA helicase HelY OS=Mycobacterium bovis BCG GN=RN06_2567 PE=4 SV=1	0	4.91906	3.31126	2	3	2	1	906	99.575	7.39	4.0007	2
FALSE	High	Master Protein	A0A0K2I1X4	Lysine--tRNA ligase OS=Mycobacterium bovis BCG GN=lysS PE=3 SV=1	0	4.89643	5.74257	2	3	2	1	505	55.675	5.47	4.70802	2
FALSE	High	Master Protein	A0A0C7DHJ3	Methyltransferase domain protein OS=Mycobacterium bovis GN=MBO1_03189 PE=4 SV=1	0	4.87407	26.0163	3	4	3	1	246	26.881	6.8	6.95161	3
FALSE	High	Master Protein	A0A0Y1CAY9	Uncharacterized protein OS=Mycobacterium bovis BCG GN=RN06_0549 PE=4 SV=1	0	4.86692	17.2973	2	3	2	1	185	20.521	6.07	4.2477	2
FALSE	High	Master Protein	A0A0H3MCU0	Probable primosomal protein N' OS=Mycobacterium bovis (strain BCG / Pasteur 1173P2) GN=priA PE=3 SV=1	0	4.82333	3.66412	2	2	2	1	655	69.796	9.69	4.29144	2
FALSE	High	Master Protein	C1AJ79	50S ribosomal protein L9 OS=Mycobacterium bovis (strain BCG / Tokyo 172 / ATCC 35737 / TMC 1019) GN=rplI PE=3 SV=1	0	4.8081	17.1053	2	2	2	1	152	16.16	8.97	2.70141	2
FALSE	High	Master Protein	A0A0H3P6A8	Possible exported protein OS=Mycobacterium bovis (strain ATCC BAA-935 / AF2122/97) GN=Mb1792c PE=4 SV=1	0	4.8033	40.9449	2	3	2	1	127	13.479	7.61	2.70443	2
FALSE	High	Master Protein	C1AQ25	Proteasome subunit alpha OS=Mycobacterium bovis (strain BCG / Tokyo 172 / ATCC 35737 / TMC 1019) GN=prcA PE=3 SV=1	0	4.79577	21.7742	2	2	2	1	248	26.707	5.24	2.25899	2
FALSE	High	Master Protein	A0A0H3MBV7	Uncharacterized protein OS=Mycobacterium bovis (strain BCG / Pasteur 1173P2) GN=BCG_1083 PE=4 SV=1	0	4.78168	11.9122	2	2	2	1	319	33.643	5.66	2.32893	2
FALSE	High	Master Protein	P64984	Uncharacterized protein Mb2324 OS=Mycobacterium bovis (strain ATCC BAA-935 / AF2122/97) GN=Mb2324 PE=4 SV=1	0	4.75524	21.25	2	2	2	1	80	8.585	6.52	3.12909	2
FALSE	High	Master Protein	A0A0H3P2G5	Uncharacterized protein OS=Mycobacterium bovis (strain ATCC BAA-935 / AF2122/97) GN=Mb0429c PE=4 SV=1	0	4.7507	12.9187	2	2	2	1	209	21.724	9.41	2.12046	2
FALSE	High	Master Protein	A0A0H3MCN7	Putative 3-oxoacyl-[acyl-carrier protein] reductase fabG2 OS=Mycobacterium bovis (strain BCG / Pasteur 1173P2) GN=fabG2 PE=4 SV=1	0	4.73483	12.9555	2	2	2	1	247	25.854	8.16	5.92399	2
FALSE	High	Master Protein	A0A0K2I2F9	Uncharacterized protein OS=Mycobacterium bovis BCG GN=RN06_4613 PE=4 SV=1	0	4.72147	32.2981	3	3	3	1	161	17.396	5.25	2.83078	3
FALSE	High	Master Protein	A0A0Y1CI17	Uncharacterized protein OS=Mycobacterium bovis BCG GN=RN06_1868 PE=4 SV=1	0	4.68035	19.9095	2	2	2	1	221	24.041	6.04	2.29021	2
FALSE	High	Master Protein	A0A0H3P3A7	Probable peroxidoxin bcpB OS=Mycobacterium bovis (strain ATCC BAA-935 / AF2122/97) GN=bcpB PE=4 SV=1	0	4.65899	26.6234	2	2	2	1	154	16.884	9.13	4.47631	2
FALSE	High	Master Protein	A0A083WG23	50S ribosomal protein L14 OS=Mycobacterium bovis GN=rplN PE=3 SV=1	0	4.65305	18.8525	2	2	2	1	122	13.419	10.13	2.34993	2
FALSE	High	Master Protein	A0A0Y1CAA1	Lipoprotein LprG OS=Mycobacterium bovis BCG GN=RN06_1747 PE=4 SV=1	0	4.63647	24.2678	2	2	2	1	239	24.849	7.99	2.70072	2
FALSE	High	Master Protein	A0A0H4XVF9	4,5-9,10-diseco-3-hydroxy-5,9, 17-trioxoandrosta-1(10),2-diene-4-oate hydrolase OS=Mycobacterium bovis GN=BOVR_18620 PE=4 SV=1	0	4.63378	19.5876	3	3	3	1	291	31.855	7.69	2.86825	3
FALSE	High	Master Protein	A0A0H3M4H4	Macrolide-transport ATP-binding protein ABC transporter OS=Mycobacterium bovis (strain BCG / Pasteur 1173P2) GN=BCG_1706c PE=4 SV=1	0	4.62533	5.24535	2	3	2	1	591	64.982	6.67	6.662	2
FALSE	High	Master Protein	A0A0K2HXF8	Toxin ParE2 OS=Mycobacterium bovis BCG GN=RN06_2628 PE=4 SV=1	0	4.61753	25.7143	2	2	2	1	105	12.305	6.54	4.64275	2
FALSE	High	Master Protein	A0A0H3P4K2	Epoxide hydrolase OS=Mycobacterium bovis (strain ATCC BAA-935 / AF2122/97) GN=ephg PE=4 SV=1	0	4.57549	15.4362	2	2	2	1	149	16.583	4.96	2.75959	2
FALSE	High	Master Protein	A0A0H3MD65	Polyphosphate glucokinase ppgK OS=Mycobacterium bovis (strain BCG / Pasteur 1173P2) GN=ppgK PE=4 SV=1	0	4.53228	14.717	2	2	2	1	265	27.4	6.4	2.65808	2
FALSE	High	Master Protein	A0A0H3P8M5	TRK SYSTEM POTASSIUM UPTAKE PROTEIN CEOB OS=Mycobacterium bovis (strain ATCC BAA-935 / AF2122/97) GN=ceoB PE=4 SV=1	0	4.51199	15.4185	2	2	2	1	227	24.195	6.37	4.50153	2
FALSE	High	Master Protein	P63381	UvrABC system protein A OS=Mycobacterium bovis (strain ATCC BAA-935 / AF2122/97) GN=uvrA PE=3 SV=1	0	4.49651	2.57202	2	2	2	1	972	106.066	6.89	1.81059	2
FALSE	High	Master Protein	A0A0C7DFE9	Proline-rich antigen pra OS=Mycobacterium bovis GN=MBO1_02302 PE=4 SV=1	0	4.39284	14.2857	2	2	2	1	245	25.561	6.51	4.4596	2
FALSE	High	Master Protein	A0A083WCE4	NAD-dependent protein deacylase OS=Mycobacterium bovis GN=cobB PE=3 SV=1	0	4.36335	13.5021	2	2	2	1	237	25.645	4.92	4.04146	2
FALSE	High	Master Protein	A0A0M4NFK2	Phospholipase OS=Mycobacterium bovis GN=BOVR_09125 PE=4 SV=1	0	4.36017	5.71429	2	2	2	1	525	57.03	6.84	4.25334	2
FALSE	High	Master Protein	A0A0C7DSK4	Uncharacterized protein OS=Mycobacterium bovis GN=MBO1_01493 PE=4 SV=1	0	4.35403	14.0909	2	2	2	1	220	24.239	5.35	4.46338	2
FALSE	High	Master Protein	A0A0H3MAA1	Probable lipoprotein lprH OS=Mycobacterium bovis (strain BCG / Pasteur 1173P2) GN=lprH PE=4 SV=1	0	4.35013	9.21053	2	2	2	1	228	24.272	8.4	5.73583	2
FALSE	High	Master Protein	A0A0C7DJK0	PPE family protein OS=Mycobacterium bovis GN=MBO1_03898 PE=4 SV=1	0	4.32312	10.396	2	2	2	1	404	41.288	9.76	1.95649	2
FALSE	High	Master Protein	A0A109S8R0	Acyl-CoA dehydrogenase FadE19 OS=Mycobacterium bovis BCG GN=RN06_3056 PE=3 SV=1	0	4.31754	8.62944	2	2	2	1	394	41.89	5.48	2.51882	2
FALSE	High	Master Protein	A0A0C7DGB0	Uncharacterized protein OS=Mycobacterium bovis GN=MBO1_02721 PE=4 SV=1	0	4.31202	10.1215	2	3	2	1	247	27.943	8	4.9583	2
FALSE	High	Master Protein	A0A0C7DFD1	Lipoprotein lprA OS=Mycobacterium bovis GN=MBO1_02381 PE=4 SV=1	0	4.2879	10.8949	2	2	2	1	257	26.36	5.25	4.08341	2
FALSE	High	Master Protein	A0A0H3MF23	Possible CoA-transferase (Beta subunit) OS=Mycobacterium bovis (strain BCG / Pasteur 1173P2) GN=BCG_3616 PE=4 SV=1	0	4.28122	20	2	2	2	1	250	27.376	6.43	2.30182	2
FALSE	High	Master Protein	A0A083WBF9	Pyruvate kinase OS=Mycobacterium bovis GN=MBO1_03408 PE=3 SV=1	0	4.22311	9.74576	3	3	3	1	472	50.653	5.68	6.12347	3
FALSE	High	Master Protein	A0A0H3P2D6	ISONIAZID INDUCTIBLE GENE PROTEIN INIC OS=Mycobacterium bovis (strain ATCC BAA-935 / AF2122/97) GN=iniC PE=4 SV=1	0	4.21461	6.49087	2	2	2	1	493	52.986	10.15	4.13915	2
FALSE	High	Master Protein	A0A0H3P749	Conserved alanine and valine and glycine rich protein OS=Mycobacterium bovis (strain ATCC BAA-935 / AF2122/97) GN=Mb2708c PE=3 SV=1	0	4.18803	7.90123	2	2	2	1	405	43.215	7.02	2.45206	2
FALSE	High	Master Protein	A0A0H3P5I4	Ribonucleoside-diphosphate reductase subunit beta OS=Mycobacterium bovis (strain ATCC BAA-935 / AF2122/97) GN=nrdF2 PE=3 SV=1	0	4.18459	5.55556	2	2	2	1	324	36.968	4.72	4.49344	2
FALSE	High	Master Protein	A0A0C7DJK7	Uncharacterized protein OS=Mycobacterium bovis GN=MBO1_03277 PE=4 SV=1	0	4.16527	20.3883	2	2	2	1	309	31.479	8.87	3.26795	2
FALSE	High	Master Protein	A0A0H3MED5	Probable transmembrane carbonic anhydrase OS=Mycobacterium bovis (strain BCG / Pasteur 1173P2) GN=BCG_3302 PE=4 SV=1	0	4.11976	6.28272	2	2	2	1	764	80.515	6.67	2.13183	2
FALSE	High	Master Protein	A0A0C7DRL4	Metallo-beta-lactamase superfamily protein OS=Mycobacterium bovis GN=MBO1_01638 PE=4 SV=1	0	4.0791	40.0943	3	3	3	1	212	22.255	5.47	1.86807	3
FALSE	High	Master Protein	A0A0H3P2G7	Gcn5-related n-acetyltransferase OS=Mycobacterium bovis (strain ATCC BAA-935 / AF2122/97) GN=Mb0436c PE=4 SV=1	0	4.0674	9.27152	2	2	2	1	302	32.572	7.02	3.75492	2
FALSE	High	Master Protein	A0A083W9A6	Cytochrome OS=Mycobacterium bovis GN=BOVR_09770 PE=3 SV=1	0	3.95828	15.9817	3	3	3	1	438	48.842	7.08	2.01966	3
FALSE	High	Master Protein	A0A0C7DHM6	Guanylate kinase OS=Mycobacterium bovis GN=gmk PE=3 SV=1	0	3.95358	14.2857	2	2	2	1	217	22.874	8.05	1.95856	2
FALSE	High	Master Protein	A0A083W0V0	Uncharacterized protein OS=Mycobacterium bovis GN=BOVR_13070 PE=4 SV=1	0	3.95098	25.0936	3	3	3	1	267	29.369	5.83	0	3
FALSE	High	Master Protein	P0A555	1-deoxy-D-xylulose-5-phosphate synthase OS=Mycobacterium bovis (strain ATCC BAA-935 / AF2122/97) GN=dxs PE=3 SV=1	0	3.94261	6.89655	3	3	3	1	638	67.843	6.38	1.76308	3
FALSE	High	Master Protein	A0A0K2HVQ8	Cob(I)yrinic acid a,c-diamide adenosyltransferase OS=Mycobacterium bovis BCG GN=RN06_1636 PE=4 SV=1	0	3.94163	18.1347	2	2	2	1	193	20.682	6.1	0	2
FALSE	High	Master Protein	A0A0C7DPF7	Beta lactamase like protein OS=Mycobacterium bovis GN=MBO1_00052 PE=4 SV=1	0	3.92696	8.45588	2	2	2	1	272	29.202	8.16	4.16012	2
FALSE	High	Master Protein	A0A0C7DK37	Uncharacterized protein OS=Mycobacterium bovis GN=MBO1_03489 PE=4 SV=1	0	3.87883	7.83699	2	2	2	1	319	32.879	5.36	3.65957	2
FALSE	High	Master Protein	A0A0K2I3A3	Uncharacterized protein OS=Mycobacterium bovis BCG GN=RN06_4611 PE=4 SV=1	0	3.82657	10.5651	2	2	2	1	407	44.916	5.43	0	2
FALSE	High	Master Protein	A0A0C7DKL9	Phosphoribosyl isomerase A OS=Mycobacterium bovis GN=priA PE=3 SV=1	0	3.77173	11.8367	2	2	2	1	245	25.747	4.83	0	2
FALSE	High	Master Protein	A0A0H3M4A4	Imidazole glycerol phosphate synthase subunit HisH OS=Mycobacterium bovis (strain BCG / Pasteur 1173P2) GN=hisH PE=3 SV=1	0	3.76388	16.5049	2	2	2	1	206	21.432	5.53	2.07785	2
FALSE	High	Master Protein	P0A527	ATP-dependent Clp protease proteolytic subunit 1 OS=Mycobacterium bovis (strain ATCC BAA-935 / AF2122/97) GN=clpP1 PE=3 SV=1	0	3.74062	20.5	2	2	2	1	200	21.694	4.92	2.35096	2
FALSE	High	Master Protein	A0A083VZ54	Mycothione reductase OS=Mycobacterium bovis GN=BOVR_14760 PE=3 SV=1	0	3.7353	10.0218	2	2	2	1	459	49.914	5.69	0	2
FALSE	High	Master Protein	A0A083WIK1	UPF0234 protein BOVR_02955 OS=Mycobacterium bovis GN=BOVR_02955 PE=3 SV=1	0	3.73201	15.9509	2	2	2	1	163	18.067	9.2	4.1523	2
FALSE	High	Master Protein	A0A083WJ65	Possible lipoprotein LprO OS=Mycobacterium bovis GN=BOVR_00950 PE=4 SV=1	0	3.71045	9.7561	2	2	2	1	369	39.117	8.69	2.2355	2
FALSE	High	Master Protein	Q7VET8	Glycine dehydrogenase (decarboxylating) OS=Mycobacterium bovis (strain ATCC BAA-935 / AF2122/97) GN=gcvP PE=3 SV=1	0	3.70372	3.1881	2	2	2	1	941	99.39	5.62	4.22249	2
FALSE	High	Master Protein	A0A0H3M828	Probable conserved transmembrane protein OS=Mycobacterium bovis (strain BCG / Pasteur 1173P2) GN=BCG_2235 PE=4 SV=1	0	3.69644	13.2	2	2	2	1	250	26.813	11.6	2.38481	2
FALSE	High	Master Protein	P67657	5'-methylthioadenosine/S-adenosylhomocysteine nucleosidase OS=Mycobacterium bovis (strain ATCC BAA-935 / AF2122/97) GN=mtnN PE=3 SV=1	0	3.69014	10.1961	2	2	2	1	255	27.322	6.42	1.92332	2
FALSE	High	Master Protein	A0A0C7DT60	Prephenate dehydrogenase OS=Mycobacterium bovis GN=MBO1_00926 PE=4 SV=1	0	3.6555	11.4551	2	2	2	1	323	33.078	6.32	2.02087	2
FALSE	High	Master Protein	A0A0H3P8U5	POSSIBLE LIPASE LIPV OS=Mycobacterium bovis (strain ATCC BAA-935 / AF2122/97) GN=lipV PE=4 SV=1	0	3.64518	16.4751	2	2	2	1	261	27.851	5.86	2.75328	2
FALSE	High	Master Protein	A0A0H3MFC5	Isoprenyl transferase OS=Mycobacterium bovis (strain BCG / Pasteur 1173P2) GN=BCG_2375c PE=3 SV=1	0	3.61201	9.12162	2	2	2	1	296	33.77	9.23	4.42964	2
FALSE	High	Master Protein	P0A5U5	Protein RecA OS=Mycobacterium bovis (strain ATCC BAA-935 / AF2122/97) GN=recA PE=3 SV=1	0	3.58873	6.07595	2	2	2	1	790	85.336	6.43	0	2
FALSE	High	Master Protein	A0A0H3M2F6	tRNA-dihydrouridine synthase OS=Mycobacterium bovis (strain BCG / Pasteur 1173P2) GN=BCG_0876c PE=3 SV=1	0	3.57259	10.5398	2	2	2	1	389	41.374	7.52	2.02724	2
FALSE	High	Master Protein	A0A0K2HSX9	NAD-dependent oxidoreductase OS=Mycobacterium bovis BCG GN=RN06_0850 PE=4 SV=1	0	3.55583	7.27273	2	2	2	1	275	29.01	5.81	2.36605	2
FALSE	High	Master Protein	A0A0H3MAK8	Possible phosphoserine phosphatase serB1 OS=Mycobacterium bovis (strain BCG / Pasteur 1173P2) GN=serB1 PE=4 SV=1	0	3.55348	11.7962	3	3	3	1	373	39.484	8.72	2.20951	3
FALSE	High	Master Protein	A1KIJ5	Methionyl-tRNA formyltransferase OS=Mycobacterium bovis (strain BCG / Pasteur 1173P2) GN=fmt PE=3 SV=1	0	3.46399	11.5385	2	2	2	1	312	32.672	9.7	4.66569	2
FALSE	High	Master Protein	A0A083WBS6	Probable transcriptional regulatory protein (Tran scriptional regulator, TetR family) OS=Mycobacterium bovis GN=BOVR_06220 PE=4 SV=1	0	3.41654	12.9353	2	2	2	1	201	21.949	8.76	3.79776	2
FALSE	High	Master Protein	A0A0K2HY89	Folylpolyglutamate synthase FolC OS=Mycobacterium bovis BCG GN=RN06_2992 PE=4 SV=1	0	3.41122	9.44559	2	2	2	1	487	50.748	5.11	3.2071	2
FALSE	High	Master Protein	A0A0C7DH86	Coenzyme F420:L-glutamate ligase OS=Mycobacterium bovis GN=fbiB PE=3 SV=1	0	3.39315	6.02679	2	2	2	1	448	47.505	5.33	0	2
FALSE	High	Master Protein	A0A083VWR5	4'-phosphopantetheinyl transferase OS=Mycobacterium bovis GN=BOVR_14440 PE=3 SV=1	0	3.37442	18.9427	2	2	2	1	227	24.661	6.68	2.5119	2
FALSE	High	Master Protein	A0A0H3M5L8	1-acylglycerol-3-phosphate O-acyltransferase OS=Mycobacterium bovis (strain BCG / Pasteur 1173P2) GN=BCG_2197c PE=4 SV=1	0	3.35106	17.8138	2	2	2	1	247	26.938	9.66	2.1887	2
FALSE	High	Master Protein	A0A0H3P8K6	Uncharacterized protein OS=Mycobacterium bovis (strain ATCC BAA-935 / AF2122/97) GN=Mb2554c PE=4 SV=1	0	3.34018	12.5	2	2	2	1	240	25.354	9.51	0	2
FALSE	High	Master Protein	A0A0H3M8T9	Uncharacterized protein OS=Mycobacterium bovis (strain BCG / Pasteur 1173P2) GN=BCG_0853 PE=4 SV=1	0	3.29898	23.4783	2	2	2	1	115	12.504	5.06	2.25359	2
FALSE	High	Master Protein	A0A0M5LB15	Phosphoserine phosphatase OS=Mycobacterium bovis GN=BOVR_15750 PE=4 SV=1	0	3.23114	9.00243	2	2	2	1	411	43.338	4.89	1.64299	2
FALSE	High	Master Protein	A0A109S8K4	Elongation factor 4 OS=Mycobacterium bovis BCG GN=lepA PE=3 SV=1	0	3.22963	4.87805	2	2	2	1	656	72.638	5.78	1.84395	2
FALSE	High	Master Protein	A0A0H3M9X3	Chromosome partition protein Smc OS=Mycobacterium bovis (strain BCG / Pasteur 1173P2) GN=smc PE=3 SV=1	0	3.22841	2.15768	2	2	2	1	1205	130.502	5.26	2.38606	2
FALSE	High	Master Protein	A0A083VWE6	Biotin--acetyl-CoA-carboxylase ligase OS=Mycobacterium bovis GN=BOVR_16995 PE=4 SV=1	0	3.22715	12.782	2	2	2	1	266	28.103	6.81	1.91723	2
FALSE	High	Master Protein	A0A0C7DT23	2-isopropylmalate synthase OS=Mycobacterium bovis GN=leuA PE=3 SV=1	0	3.18479	4.81366	2	2	2	1	644	70.11	5.2	2.3157	2
FALSE	High	Master Protein	A0A083W7E3	Monooxygenase OS=Mycobacterium bovis GN=BOVR_08075 PE=4 SV=1	0	3.18398	10.6667	2	2	2	1	375	39.596	6.06	2.19424	2
FALSE	High	Master Protein	C1AKN5	2-succinyl-5-enolpyruvyl-6-hydroxy-3-cyclohexene-1-carboxylate synthase OS=Mycobacterium bovis (strain BCG / Tokyo 172 / ATCC 35737 / TMC 1019) GN=menD PE=3 SV=1	0	3.1784	5.05415	2	2	2	1	554	57.8	6.8	4.02132	2
FALSE	High	Master Protein	A0A0C7DRI5	Acetyltransferase, GNAT family OS=Mycobacterium bovis GN=BOVR_14340 PE=4 SV=1	0	3.16249	11.8919	2	2	2	1	185	20.792	9.63	4.1087	2
FALSE	High	Master Protein	A0A0H3P3N7	5-methyltetrahydrofolate--homocystein methyltransferase meth (Methionine synthase, vitamin-b12 dependent isozyme) (Ms) OS=Mycobacterium bovis (strain ATCC BAA-935 / AF2122/97) GN=metH PE=4 SV=1	0	3.13869	4.19463	2	2	2	1	1192	130.227	5.05	2.88369	2
FALSE	High	Master Protein	A0A109SBN9	Uncharacterized protein OS=Mycobacterium bovis BCG GN=RN06_4773 PE=4 SV=1	0	3.12171	14.2857	2	2	2	1	252	27.089	5.34	4.46555	2
FALSE	High	Master Protein	P65685	Uncharacterized protein Mb2073c OS=Mycobacterium bovis (strain ATCC BAA-935 / AF2122/97) GN=Mb2073c PE=3 SV=1	0	3.07978	6.08899	2	2	2	1	854	91.328	7.09	2.15379	2
FALSE	High	Master Protein	A0A0H3P7G1	PUTATIVE CONSERVED ATPASE OS=Mycobacterium bovis (strain ATCC BAA-935 / AF2122/97) GN=Mb0443c PE=3 SV=1	0	3.0718	5.35714	2	2	2	1	728	75.3	5.35	1.61851	2
FALSE	High	Master Protein	P0A509	Acetyl-/propionyl-coenzyme A carboxylase alpha chain OS=Mycobacterium bovis (strain ATCC BAA-935 / AF2122/97) GN=accA1 PE=3 SV=1	0	3.04497	4.43425	2	2	2	1	654	70.549	5.59	1.79606	2
FALSE	High	Master Protein	P0A5S7	NAD kinase OS=Mycobacterium bovis (strain ATCC BAA-935 / AF2122/97) GN=nadK PE=3 SV=1	0.00147131	3.00305	8.79479	2	2	2	1	307	32.883	5.44	1.83702	2
FALSE	High	Master Protein	A0A0K2I0F0	NADH-quinone oxidoreductase subunit J OS=Mycobacterium bovis BCG GN=RN06_3816 PE=4 SV=1	0.00147131	2.98321	15.2672	2	2	2	1	262	27.572	8.51	2.32685	2
FALSE	High	Master Protein	A1KLS8	Histidine--tRNA ligase OS=Mycobacterium bovis (strain BCG / Pasteur 1173P2) GN=hisS PE=3 SV=1	0.00147131	2.89655	14.8936	2	2	2	1	423	45.121	5.57	2.81113	2
FALSE	High	Master Protein	A0A0Y1B9C1	Peptide methionine sulfoxide reductase MsrA OS=Mycobacterium bovis BCG GN=msrA PE=3 SV=1	0.00147131	2.88387	18.7192	2	2	2	1	203	22.617	6.42	1.8033	2
FALSE	High	Master Protein	A0A0G2Q9J0	Probable transcriptional regulatory protein (Probably asnC-family) OS=Mycobacterium bovis (strain BCG / Pasteur 1173P2) GN=BCG_3320c PE=4 SV=1	0.00147131	2.8608	11.3333	2	2	2	1	150	16.529	5.58	0	2
FALSE	High	Master Protein	A0A0K2I1Y2	GTP cyclohydrolase 1 OS=Mycobacterium bovis BCG GN=folE PE=3 SV=1	0.00147131	2.77001	15.8416	2	2	2	1	202	22.381	7.12	1.99425	2
FALSE	High	Master Protein	A0A0H3MBA3	Uncharacterized protein OS=Mycobacterium bovis (strain BCG / Pasteur 1173P2) GN=BCG_1911 PE=4 SV=1	0.00147131	2.76117	12.9252	2	2	2	1	147	15.969	6.57	4.62035	2
FALSE	High	Master Protein	A0A0C7DT24	Uncharacterized protein OS=Mycobacterium bovis GN=MBO1_03845 PE=4 SV=1	0.00147131	2.74649	26.0638	2	2	2	1	188	19.151	9.39	0	2
FALSE	High	Master Protein	A1KKF3	Proteasome subunit beta OS=Mycobacterium bovis (strain BCG / Pasteur 1173P2) GN=prcB PE=3 SV=1	0.00147131	2.74536	11.6838	2	2	2	1	291	30.286	4.83	3.86062	2
FALSE	High	Master Protein	A0A0C7DM19	Uncharacterized protein OS=Mycobacterium bovis GN=MBO1_03071 PE=4 SV=1	0.00147131	2.71289	11.4504	2	2	2	1	262	28.639	5.71	2.34645	2
FALSE	High	Master Protein	A0A083WG76	ATP-binding protein OS=Mycobacterium bovis GN=BOVR_04015 PE=4 SV=1	0.00147131	2.69309	8.86598	2	2	2	1	485	52.057	7.08	1.89891	2
FALSE	High	Master Protein	A0A083VPW2	Uncharacterized protein OS=Mycobacterium bovis GN=BOVR_20275 PE=4 SV=1	0.00147131	2.57549	21.5909	2	2	2	1	176	19.81	4.91	2.00945	2
FALSE	High	Master Protein	A0A083VS35	UDP-glucose 4-epimerase OS=Mycobacterium bovis GN=BOVR_18910 PE=4 SV=1	0.00147131	2.55711	9.23567	2	2	2	1	314	33.561	6.19	1.78211	2
FALSE	High	Master Protein	A0A0C7DQG0	4-hydroxy-3-methylbut-2-enyl diphosphate reductase OS=Mycobacterium bovis GN=ispH PE=3 SV=1	0.00147131	2.50706	13.6612	2	2	2	1	366	39.692	5.8	1.83385	2
FALSE	High	Master Protein	A0A083WN30	GDP-D-mannose dehydratase, putative (Possible GDP-mannose 4,6-dehydratase Gca (GDP-D-mannose dehydratase)) OS=Mycobacterium bovis GN=BOVR_00600 PE=4 SV=1	0.00147131	2.47426	7.54717	2	2	2	1	318	35.258	6.29	0	2
FALSE	High	Master Protein	A0A0C7DTQ3	Uncharacterized protein OS=Mycobacterium bovis GN=MBO1_03849 PE=4 SV=1	0.00147131	2.45849	10.2804	2	2	2	1	321	37.019	9.82	1.68322	2
FALSE	High	Master Protein	A0A083W0R0	Uncharacterized protein OS=Mycobacterium bovis GN=BOVR_14605 PE=4 SV=1	0.00147131	2.40947	7.09459	2	2	2	1	296	33.268	7.21	0	2
FALSE	High	Master Protein	A0A0H3P2R0	PROBABLE METHYLTRANSFERASE OS=Mycobacterium bovis (strain ATCC BAA-935 / AF2122/97) GN=Mb1535c PE=4 SV=1	0.00147131	2.37997	13.2296	2	2	2	1	257	28.485	6.32	0	2
FALSE	High	Master Protein	A0A0K2I0S3	Uncharacterized protein OS=Mycobacterium bovis BCG GN=RN06_3955 PE=4 SV=1	0.00147131	2.35688	14.2276	2	2	2	1	246	25.485	4.94	2.22724	2
FALSE	High	Master Protein	P63534	Putative flavin-containing monoamine oxidase AofH OS=Mycobacterium bovis (strain ATCC BAA-935 / AF2122/97) GN=aofH PE=3 SV=1	0.00147131	2.26559	8.14978	2	2	2	1	454	49.106	7.08	1.69909	2

## Sheet: Regular Lab Condition
Checked	Protein FDR Confidence	Master	Accession	Description	Exp. q-value	Sum PEP Score	Coverage	# Peptides	# PSMs	# Unique Peptides	# Protein Groups	# AAs	MW [kDa]	calc. pI	Score Sequest HT	# Peptides Sequest HT
FALSE	High	Master Protein	A0A083WLG7	60 kDa chaperonin OS=Mycobacterium bovis GN=groEL PE=3 SV=1	0	366.247	87.5926	55	128	54	1	540	56.692	4.92	333.552	55
FALSE	High	Master Protein	G7QWY8	Elongation factor Tu OS=Mycobacterium bovis BCG str. Mexico GN=tuf PE=3 SV=1	0	199.68	84.0909	26	55	26	1	396	43.566	5.45	141.065	26
FALSE	High	Master Protein	G8FRU6	60 kDa chaperonin OS=Mycobacterium bovis BCG str. Mexico GN=groEL2 PE=3 SV=1	0	160.995	67.9035	29	48	28	1	539	55.843	5.12	116.781	29
FALSE	High	Master Protein	A0A0K2HXK0	Uncharacterized protein OS=Mycobacterium bovis BCG GN=RN06_2736 PE=4 SV=1	0	124.056	49.9025	19	34	19	1	513	56.298	6.67	87.2561	19
FALSE	High	Master Protein	A0A083WJS5	DNA-directed RNA polymerase subunit beta' OS=Mycobacterium bovis GN=rpoC PE=3 SV=1	0	105.49	36.2462	33	37	33	1	1316	146.678	6.2	70.0584	33
FALSE	High	Master Protein	A0A083W510	Alpha-hydroxy-acid oxidizing enzyme OS=Mycobacterium bovis GN=BOVR_09725 PE=4 SV=1	0	104.788	64.2512	21	31	21	1	414	45.299	9.7	72.66	21
FALSE	High	Master Protein	A0A0H3MDR9	D-3-phosphoglycerate dehydrogenase OS=Mycobacterium bovis (strain BCG / Pasteur 1173P2) GN=serA1 PE=3 SV=1	0	104.464	55.6818	16	28	16	1	528	54.521	4.96	76.0863	16
FALSE	High	Master Protein	A0A0H3M6S8	Glutamine synthetase OS=Mycobacterium bovis (strain BCG / Pasteur 1173P2) GN=glnA1 PE=3 SV=1	0	92.3854	39.1213	12	25	12	1	478	53.536	5.22	64.7653	12
FALSE	High	Master Protein	A1KI96	ATP synthase subunit alpha OS=Mycobacterium bovis (strain BCG / Pasteur 1173P2) GN=atpA PE=3 SV=1	0	90.2616	48.6339	21	29	21	1	549	59.252	5.15	57.6705	21
FALSE	High	Master Protein	A0A0H3P8B3	Conserved protein OS=Mycobacterium bovis (strain ATCC BAA-935 / AF2122/97) GN=Mb1822 PE=4 SV=1	0	88.0501	68	15	24	15	1	300	32.379	5.05	58.3407	15
FALSE	High	Master Protein	A0A0K2HRP0	Chaperone protein DnaK OS=Mycobacterium bovis BCG GN=dnaK PE=2 SV=1	0	85.935	57.76	23	30	23	1	625	66.79	4.97	49.0633	23
FALSE	High	Master Protein	A0A0H3MAE5	Probable transcriptional regulatory protein moxR1 OS=Mycobacterium bovis (strain BCG / Pasteur 1173P2) GN=moxR1 PE=4 SV=1	0	84.3803	69.496	19	27	18	1	377	40.738	6.39	59.7061	19
FALSE	High	Master Protein	Q7TTR2	Long-chain-fatty-acid--AMP ligase FadD32 OS=Mycobacterium bovis (strain ATCC BAA-935 / AF2122/97) GN=fadD32 PE=3 SV=1	0	83.9361	51.8053	20	29	20	1	637	69.217	6.18	47.7606	20
FALSE	High	Master Protein	A0A0Y1BYR9	Cysteine desulfurase OS=Mycobacterium bovis BCG GN=RN06_1817 PE=3 SV=1	0	83.4003	35.8187	15	26	3	1	684	73.511	5.96	66.1222	15
FALSE	High	Master Protein	A0A093P6H0	Phthiocerol synthesis polyketide synthase type I PpsE (Beta-ketoacyl-acyl-carrier-protein synthase I) (EC 2. 3.1.41) OS=Mycobacterium bovis GN=MBO1_02701 PE=4 SV=1	0	77.5119	26.9489	25	31	25	1	1488	158.648	5.71	50.4677	25
FALSE	High	Master Protein	A0A083W8L8	ABC transporter, ATP-binding protein (Probable co nserved ATP-binding protein ABC transporter) OS=Mycobacterium bovis GN=sufC PE=4 SV=1	0	77.3652	79.6992	13	24	1	1	266	28.805	6.14	61.8123	13
FALSE	High	Master Protein	A0A083VWF2	Acetyl-/propionyl-CoA carboxylase subunit alpha OS=Mycobacterium bovis GN=BOVR_17025 PE=4 SV=1	0	76.085	60.1667	18	25	18	1	600	63.744	5.73	56.8309	18
FALSE	High	Master Protein	P65341	5-methyltetrahydropteroyltriglutamate--homocysteine methyltransferase OS=Mycobacterium bovis (strain ATCC BAA-935 / AF2122/97) GN=metE PE=3 SV=1	0	75.5518	31.4888	19	24	19	1	759	81.531	5.29	51.209	19
FALSE	High	Master Protein	A0A0H3M6V0	3-oxoacyl-[acyl-carrier protein] synthase 2 kasB OS=Mycobacterium bovis (strain BCG / Pasteur 1173P2) GN=kasB PE=3 SV=1	0	73.2727	66.895	15	23	15	1	438	46.392	5.49	43.8735	15
FALSE	High	Master Protein	A0A0H3P1M4	PROBABLE 3-OXOACYL-[ACYL-CARRIER PROTEIN] REDUCTASE FABG4 (3-KETOACYL-ACYL CARRIER PROTEIN REDUCTASE) OS=Mycobacterium bovis (strain ATCC BAA-935 / AF2122/97) GN=fabG4 PE=4 SV=1	0	73.1452	70.2643	19	26	19	1	454	46.801	6.46	44.4095	19
FALSE	High	Master Protein	A0A0C7DG67	Uncharacterized protein OS=Mycobacterium bovis GN=MBO1_01943 PE=4 SV=1	0	72.8234	61.9672	16	24	16	1	305	33.864	6.25	46.6657	16
FALSE	High	Master Protein	C1AMN4	Malate dehydrogenase OS=Mycobacterium bovis (strain BCG / Tokyo 172 / ATCC 35737 / TMC 1019) GN=mdh PE=3 SV=1	0	72.288	44.3769	13	20	13	1	329	34.301	4.79	48.7912	13
FALSE	High	Master Protein	Q7TXM1	Long-chain-fatty-acid--AMP ligase FadD26 OS=Mycobacterium bovis (strain ATCC BAA-935 / AF2122/97) GN=fadD26 PE=1 SV=1	0	71.8907	52.6587	18	24	18	1	583	62.972	6.28	46.1082	18
FALSE	High	Master Protein	A0A0G2Q9I2	Possible short-chain dehydrogenase/reductase OS=Mycobacterium bovis (strain BCG / Pasteur 1173P2) GN=BCG_3252 PE=4 SV=1	0	70.7346	53.9007	16	24	16	1	282	29.795	5.49	43.5668	16
FALSE	High	Master Protein	A1KGE7	DNA-directed RNA polymerase subunit beta OS=Mycobacterium bovis (strain BCG / Pasteur 1173P2) GN=rpoB PE=3 SV=2	0	70.5273	32.5976	24	26	24	1	1178	129.784	5.03	50.6748	24
FALSE	High	Master Protein	A1KMU5	Phthiodiolone/phenolphthiodiolone dimycocerosates ketoreductase OS=Mycobacterium bovis (strain BCG / Pasteur 1173P2) GN=BCG_2972c PE=3 SV=1	0	70.2641	61.6798	15	24	15	1	381	41.322	9.07	45.4589	15
FALSE	High	Master Protein	A1KMU7	Trans-acting enoyl reductase OS=Mycobacterium bovis (strain BCG / Pasteur 1173P2) GN=BCG_2974 PE=3 SV=1	0	69.811	56.6986	15	20	14	1	418	45.076	9.11	43.6417	15
FALSE	High	Master Protein	P66780	Uncharacterized oxidoreductase Mb1570 OS=Mycobacterium bovis (strain ATCC BAA-935 / AF2122/97) GN=Mb1570 PE=3 SV=1	0	68.7481	53.9589	15	21	15	1	341	36.798	8.98	46.8685	15
FALSE	High	Master Protein	Q7TXL8	Phthiocerol/phenolphthiocerol synthesis polyketide synthase type I PpsC OS=Mycobacterium bovis (strain ATCC BAA-935 / AF2122/97) GN=ppsC PE=1 SV=1	0	65.9383	15.7678	21	21	21	1	2188	230.479	5.24	39.8961	21
FALSE	High	Master Protein	A0A0K2I0Q3	Adenosylhomocysteinase OS=Mycobacterium bovis BCG GN=ahcY PE=3 SV=1	0	64.3304	53.3333	18	26	18	1	495	54.289	5.22	47.6175	18
FALSE	High	Master Protein	A0A083WJU2	Elongation factor G OS=Mycobacterium bovis GN=fusA PE=3 SV=1	0	63.4817	38.8017	15	21	15	1	701	77.154	5.06	48.2924	15
FALSE	High	Master Protein	A0A0K2I1X0	ATP-dependent protease ATP-binding subunit ClpC OS=Mycobacterium bovis BCG GN=RN06_4397 PE=4 SV=1	0	62.58	34.7877	18	24	17	1	848	93.495	5.88	48.0144	18
FALSE	High	Master Protein	A0A0H3P3B7	30s ribosomal protein s1 rpsa OS=Mycobacterium bovis (strain ATCC BAA-935 / AF2122/97) GN=rpsA PE=4 SV=1	0	62.1677	39.9168	16	22	16	1	481	53.199	4.93	43.7028	16
FALSE	High	Master Protein	A0A0C7D9V8	Hydroxymycolate synthase MmaA4 (Myco lic acid methyltransferase) (MA-MT) (S-adenosylmethionine-d ependent methyltransferase) (AdoMet-MT) (SAM-MT) OS=Mycobacterium bovis GN=MBO1_00472 PE=4 SV=1	0	61.761	71.0963	15	24	14	1	301	34.614	5.71	44.2049	15
FALSE	High	Master Protein	A0A0C7DFW4	Putative integration host factor MihF OS=Mycobacterium bovis GN=MBO1_02487 PE=4 SV=1	0	61.1093	31.5789	11	20	11	1	190	20.822	10.33	45.2831	11
FALSE	High	Master Protein	Q7TXK8	Phenolphthiocerol synthesis polyketide synthase type I Pks15/1 OS=Mycobacterium bovis (strain ATCC BAA-935 / AF2122/97) GN=pks15/1 PE=1 SV=1	0	60.5663	14.8674	17	20	16	1	2112	218.168	4.98	43.0339	17
FALSE	High	Master Protein	A0A0C7DD57	Methyltransferase/methylase OS=Mycobacterium bovis GN=MBO1_01281 PE=4 SV=1	0	60.339	52.1739	9	17	9	1	276	29.799	10.45	49.4583	9
FALSE	High	Master Protein	A0A083WJC8	Acetyl-CoA acetyltransferase OS=Mycobacterium bovis GN=BOVR_01285 PE=3 SV=1	0	59.9078	42.9545	13	19	13	1	440	46.079	6.67	39.5716	13
FALSE	High	Master Protein	A0A0H3MGR2	Probable multifunctional mycocerosic acid synthase membrane-associated mas OS=Mycobacterium bovis (strain BCG / Pasteur 1173P2) GN=mas PE=4 SV=1	0	59.7029	15.7745	18	24	17	1	2111	224.256	5.21	44.2285	18
FALSE	High	Master Protein	A0A0H3M499	Probable polyketide beta-ketoacyl synthase pks3 OS=Mycobacterium bovis (strain BCG / Pasteur 1173P2) GN=pks3 PE=4 SV=1	0	59.0167	16.9305	21	23	20	1	2085	220.307	5.59	37.0681	21
FALSE	High	Master Protein	A0A083WAR4	ATP synthase subunit beta OS=Mycobacterium bovis GN=atpD PE=3 SV=1	0	57.5311	37.2428	12	16	12	1	486	53.061	4.97	36.9181	12
FALSE	High	Master Protein	C1AHL0	GMP synthase [glutamine-hydrolyzing] OS=Mycobacterium bovis (strain BCG / Tokyo 172 / ATCC 35737 / TMC 1019) GN=guaA PE=3 SV=1	0	57.1933	45.5238	13	19	13	1	525	56.025	5.54	47.0217	13
FALSE	High	Master Protein	A0A0C7DIH3	Oxidoreductase, short-chain dehydrogenase/reducta se family OS=Mycobacterium bovis GN=MBO1_03597 PE=4 SV=1	0	57.0364	57.3379	11	17	11	1	293	30.561	5.47	38.5179	11
FALSE	High	Master Protein	A1KKQ5	Probable cytosol aminopeptidase OS=Mycobacterium bovis (strain BCG / Pasteur 1173P2) GN=pepA PE=3 SV=1	0	56.2176	37.8641	12	16	12	1	515	53.414	8.06	36.5501	12
FALSE	High	Master Protein	A0A0H3MDP0	Phenolpthiocerol synthesis type-I polyketide synthase ppsB OS=Mycobacterium bovis (strain BCG / Pasteur 1173P2) GN=ppsB PE=4 SV=1	0	55.1453	18.0104	14	19	13	1	1538	162.413	5.33	35.1327	14
FALSE	High	Master Protein	A0A0H3P8J8	PROBABLE MACROLIDE-TRANSPORT ATP-BINDING PROTEIN ABC TRANSPORTER OS=Mycobacterium bovis (strain ATCC BAA-935 / AF2122/97) GN=Mb2504c PE=4 SV=1	0	54.9741	42.1147	14	20	14	1	558	61.855	5.31	42.4298	14
FALSE	High	Master Protein	A0A083WMM7	Acyl dehydratase OS=Mycobacterium bovis GN=BOVR_01140 PE=4 SV=1	0	54.6793	68.8427	18	24	18	1	337	35.766	6.99	25.0404	18
FALSE	High	Master Protein	A0A083WIP8	Probable dehydrogenase/reductase OS=Mycobacterium bovis GN=BOVR_02285 PE=4 SV=1	0	53.8982	43.0868	9	17	8	1	311	33.629	9.66	43.0513	9
FALSE	High	Master Protein	A0A0H3MF34	3-oxoacyl-[acyl-carrier protein] synthase 1 kasA OS=Mycobacterium bovis (strain BCG / Pasteur 1173P2) GN=kasA PE=3 SV=1	0	53.4014	51.4423	11	21	11	1	416	43.289	5.29	33.0506	11
FALSE	High	Master Protein	A0A109S7U3	Malate synthase G OS=Mycobacterium bovis BCG GN=glcB PE=3 SV=1	0	51.5256	37.112	15	16	15	1	741	80.353	5.22	39.3723	15
FALSE	High	Master Protein	A0A083VTZ0	DNA-directed RNA polymerase subunit alpha OS=Mycobacterium bovis GN=rpoA PE=3 SV=1	0	50.8738	64.2651	17	20	17	1	347	37.683	4.75	36.4741	17
FALSE	High	Master Protein	A0A0H3MGW8	Probable electron transfer flavoprotein (Alpha-subunit) fixB OS=Mycobacterium bovis (strain BCG / Pasteur 1173P2) GN=fixB PE=4 SV=1	0	50.5762	56.6038	9	14	9	1	318	31.7	4.79	34.8551	9
FALSE	High	Master Protein	A0A0C7DFV5	Putative cell division ATP-binding protein OS=Mycobacterium bovis GN=MBO1_02634 PE=4 SV=1	0	50.3605	78.2609	13	17	13	1	230	25.712	9.26	39.4913	13
FALSE	High	Master Protein	A0A0C7DFG8	S-adenosylmethionine synthase OS=Mycobacterium bovis GN=metK PE=3 SV=1	0	50.2528	44.1687	11	14	11	1	403	43.02	5.12	29.0691	11
FALSE	High	Master Protein	Q7U0N6	Fumarate hydratase class II OS=Mycobacterium bovis (strain ATCC BAA-935 / AF2122/97) GN=fumC PE=3 SV=1	0	50.0288	34.1772	9	11	9	1	474	50.11	5.52	31.0368	9
FALSE	High	Master Protein	A0A0K2HWS8	Isocitrate lyase AceAb OS=Mycobacterium bovis BCG GN=RN06_2371 PE=4 SV=1	0	48.7896	30.1567	16	19	16	1	766	85.266	6.19	30.1656	16
FALSE	High	Master Protein	A0A0H3M5M8	Probable oxidoreductase OS=Mycobacterium bovis (strain BCG / Pasteur 1173P2) GN=BCG_1807 PE=4 SV=1	0	47.9055	43.9462	13	15	13	1	446	48.31	5.54	26.8437	13
FALSE	High	Master Protein	P65070	Uncharacterized protein Mb3433 OS=Mycobacterium bovis (strain ATCC BAA-935 / AF2122/97) GN=Mb3433 PE=4 SV=1	0	47.8419	69.8473	11	16	11	1	262	28.21	5.92	33.7349	11
FALSE	High	Master Protein	A0A0C7DTA4	FAD flavoprotein oxidase, putative (Probable succ inate dehydrogenase [iron-sulfur subunit] (Succinic dehydro genase)) OS=Mycobacterium bovis GN=MBO_303194 PE=4 SV=1	0	47.8016	27.709	12	16	12	1	646	70.694	5.87	34.0852	12
FALSE	High	Master Protein	A0A0H3P6S3	Esx conserved component ecca1. esx-1 type vii secretion system protein OS=Mycobacterium bovis (strain ATCC BAA-935 / AF2122/97) GN=ecca1 PE=4 SV=1	0	47.5065	36.1257	15	18	15	1	573	62.415	5.19	31.1684	15
FALSE	High	Master Protein	A0A0C7DKB2	Group 1 truncated hemoglobin GlbN (Truncated hemo globin) (TrHbN) (Hemoglobin-like protein HbN) OS=Mycobacterium bovis GN=MBO_300348 PE=4 SV=1	0	47.2575	45.5882	4	9	4	1	136	14.429	6.05	28.1192	4
FALSE	High	Master Protein	A0A083VV02	Acyl-CoA synthetase OS=Mycobacterium bovis GN=BOVR_15245 PE=4 SV=1	0	46.9088	33.1915	13	16	13	1	705	75.151	5.24	29.7818	13
FALSE	High	Master Protein	A1KMN3	Elongation factor Ts OS=Mycobacterium bovis (strain BCG / Pasteur 1173P2) GN=tsf PE=3 SV=1	0	46.8469	52.7675	11	15	11	1	271	28.767	5.39	35.5896	11
FALSE	High	Master Protein	A0A0C7DJ27	Uncharacterized PPE family protein PPE30 OS=Mycobacterium bovis GN=BOVR_09365 PE=4 SV=1	0	46.7588	28.5097	6	18	6	1	463	45.992	5.64	43.2494	6
FALSE	High	Master Protein	A0A0C7DDP5	Uncharacterized protein OS=Mycobacterium bovis GN=MBO1_01550 PE=4 SV=1	0	46.4908	35.2761	7	15	7	1	326	35.602	6.33	36.4572	7
FALSE	High	Master Protein	A0A0C7DC16	4-hydroxy-3-methylbut-2-en-1-yl diphosphate synthase (flavodoxin) OS=Mycobacterium bovis GN=ispG PE=3 SV=1	0	46.2231	57.8811	14	17	14	1	387	40.427	5.26	33.3521	14
FALSE	High	Master Protein	A0A0H3M2H1	Uncharacterized protein OS=Mycobacterium bovis (strain BCG / Pasteur 1173P2) GN=BCG_0573 PE=4 SV=1	0	45.4183	41.9753	12	14	12	1	405	43.028	7.3	32.3524	12
FALSE	High	Master Protein	A0A0H3MC20	Polyketide synthase pks13 OS=Mycobacterium bovis (strain BCG / Pasteur 1173P2) GN=pks13 PE=4 SV=1	0	45.296	13.9065	13	15	13	1	1733	186.343	4.96	31.2787	13
FALSE	High	Master Protein	A0A083VWF9	Uncharacterized protein OS=Mycobacterium bovis GN=BOVR_17060 PE=4 SV=1	0	44.7051	44.5783	11	16	11	1	415	45.304	5.64	32.6129	11
FALSE	High	Master Protein	A0A0H3M4V4	Possible magnesium chelatase OS=Mycobacterium bovis (strain BCG / Pasteur 1173P2) GN=BCG_1012 PE=4 SV=1	0	44.0824	48.8017	13	14	13	1	459	49.561	5.38	27.8743	13
FALSE	High	Master Protein	A0A0K2HRC0	Mce associated membrane protein OS=Mycobacterium bovis BCG GN=RN06_0221 PE=4 SV=1	0	44.0299	48.5106	6	9	6	1	235	24.441	4.86	28.3614	6
FALSE	High	Master Protein	A0A083WGK9	Phosphoserine aminotransferase OS=Mycobacterium bovis GN=serC PE=3 SV=1	0	43.8575	36.4362	6	11	6	1	376	40.209	4.94	28.479	6
FALSE	High	Master Protein	A0A0H3M4R2	Conserved hypothetical pro-rich protease OS=Mycobacterium bovis (strain BCG / Pasteur 1173P2) GN=BCG_1828 PE=4 SV=1	0	43.8114	32.6496	8	13	8	1	585	59.99	5.74	30.3976	8
FALSE	High	Master Protein	P15020	10 kDa chaperonin OS=Mycobacterium bovis (strain ATCC BAA-935 / AF2122/97) GN=groS PE=1 SV=4	0	43.6956	89	12	18	12	1	100	10.798	4.7	36.8745	12
FALSE	High	Master Protein	A0A0H3MB17	Possible zinc-containing alcohol dehydrogenase NAD dependant adhB OS=Mycobacterium bovis (strain BCG / Pasteur 1173P2) GN=adhB PE=3 SV=1	0	43.6437	56.5333	9	13	9	1	375	39.722	5.31	27.1753	9
FALSE	High	Master Protein	A0A0H3M3L4	Dihydrolipoyl dehydrogenase OS=Mycobacterium bovis (strain BCG / Pasteur 1173P2) GN=lpd PE=4 SV=1	0	43.5779	31.0345	9	12	9	1	464	49.208	5.86	31.1793	9
FALSE	High	Master Protein	A0A0M4NBY8	Aconitate hydratase OS=Mycobacterium bovis GN=acnA PE=4 SV=1	0	42.9811	28.8279	18	19	18	1	947	102.756	5.08	30.3677	18
FALSE	High	Master Protein	A0A0H3M7N1	Probable fatty-acid-CoA ligase fadD2 OS=Mycobacterium bovis (strain BCG / Pasteur 1173P2) GN=fadD2 PE=4 SV=1	0	42.8691	40.1786	14	17	14	1	560	59.87	6.77	32.0793	14
FALSE	High	Master Protein	A0A0H3M4A9	Uncharacterized protein OS=Mycobacterium bovis (strain BCG / Pasteur 1173P2) GN=BCG_0780 PE=4 SV=1	0	42.8225	66.5289	12	13	12	1	242	25.964	5.39	29.206	12
FALSE	High	Master Protein	A1KKZ1	Chaperone protein HtpG OS=Mycobacterium bovis (strain BCG / Pasteur 1173P2) GN=htpG PE=3 SV=1	0	42.8121	27.0479	13	17	13	1	647	72.916	4.88	33.0781	13
FALSE	High	Master Protein	A1KPC8	Phosphoglucosamine mutase OS=Mycobacterium bovis (strain BCG / Pasteur 1173P2) GN=glmM PE=3 SV=1	0	42.7964	30.8036	9	13	9	1	448	45.845	5.43	36.4216	9
FALSE	High	Master Protein	A0A083W507	Ferredoxin reductase (Probable reductase) OS=Mycobacterium bovis GN=MBO1_03829 PE=4 SV=1	0	42.6777	40.6326	12	15	12	1	411	43.602	5.14	29.7344	12
FALSE	High	Master Protein	A0A0H3P2Z4	PROBABLE FATTY-ACID-COA LIGASE FADD6 (FATTY-ACID-COA SYNTHETASE) (FATTY-ACID-COA SYNTHASE) OS=Mycobacterium bovis (strain ATCC BAA-935 / AF2122/97) GN=fadD6 PE=4 SV=1	0	42.5769	34.6734	16	16	16	1	597	64.297	7.91	19.8225	16
FALSE	High	Master Protein	A1KFU9	Heparin-binding hemagglutinin OS=Mycobacterium bovis (strain BCG / Pasteur 1173P2) GN=hbhA PE=1 SV=1	0	42.5686	39.6985	9	12	9	1	199	21.522	9.19	25.533	9
FALSE	High	Master Protein	A0A083VX57	Doxorubicin resistance ATP-binding protein DrrA OS=Mycobacterium bovis GN=BOVR_15185 PE=4 SV=1	0	41.8219	60.1208	14	20	14	1	331	35.774	6.57	34.163	14
FALSE	High	Master Protein	A0A0K2HYK3	Short-chain type dehydrogenase/reductase OS=Mycobacterium bovis BCG GN=RN06_3068 PE=4 SV=1	0	41.0135	60.0746	10	15	10	1	268	27.996	8.66	29.527	10
FALSE	High	Master Protein	A0A0C7DI38	Acyl-CoA synthetase OS=Mycobacterium bovis GN=BOVR_15210 PE=4 SV=1	0	40.6708	31.2069	11	13	9	1	580	62.63	5.5	26.7137	11
FALSE	High	Master Protein	A0A0K2HS13	3-hydroxybutyryl-CoA dehydrogenase OS=Mycobacterium bovis BCG GN=RN06_0578 PE=4 SV=1	0	40.2653	48.6014	8	12	8	1	286	30.709	5.31	34.2049	8
FALSE	High	Master Protein	A0A0M4NHJ4	Uncharacterized protein OS=Mycobacterium bovis GN=BOVR_14065 PE=4 SV=1	0	39.5656	42.2031	11	13	11	1	699	72.327	4.64	33.037	11
FALSE	High	Master Protein	A0A0H3M2X4	Probable molybdopterin biosynthesis protein moeA1 OS=Mycobacterium bovis (strain BCG / Pasteur 1173P2) GN=moeA1 PE=4 SV=1	0	39.5409	33.8028	9	13	9	1	426	44.263	6.57	32.3049	9
FALSE	High	Master Protein	A0A0C7DKW7	Peptidyl-prolyl cis-trans isomerase OS=Mycobacterium bovis GN=MBO1_03281 PE=3 SV=1	0	39.4139	56.0847	9	15	9	1	189	19.896	6.52	36.3924	9
FALSE	High	Master Protein	A0A083WDV3	Acyl-CoA dehydrogenase OS=Mycobacterium bovis GN=BOVR_04615 PE=3 SV=1	0	39.2656	27.2308	11	15	11	1	650	70.701	5.9	22.7035	11
FALSE	High	Master Protein	A0A0H3P829	PROBABLE PROPIONYL-COA CARBOXYLASE BETA CHAIN 4 ACCD4 (PCCASE) (PROPANOYL-COA:CARBON DIOXIDE LIGASE) OS=Mycobacterium bovis (strain ATCC BAA-935 / AF2122/97) GN=accD4 PE=4 SV=1	0	38.8451	29.3103	9	15	9	1	522	56.644	5.57	27.6159	9
FALSE	High	Master Protein	A0A0H3M245	Possible ribonucleotide-transport ATP-binding protein ABC transporter mkl OS=Mycobacterium bovis (strain BCG / Pasteur 1173P2) GN=mkl PE=4 SV=1	0	38.6899	33.1476	12	13	12	1	359	39.369	6	23.8851	12
FALSE	High	Master Protein	A0A083W359	Acyl carrier protein OS=Mycobacterium bovis GN=acpP PE=3 SV=1	0	38.678	44.3478	5	7	5	1	115	12.516	4.09	24.5462	5
FALSE	High	Master Protein	P66538	30S ribosomal protein S2 OS=Mycobacterium bovis (strain ATCC BAA-935 / AF2122/97) GN=rpsB PE=3 SV=1	0	38.6615	36.2369	8	12	8	1	287	31.07	6.43	27.6866	8
FALSE	High	Master Protein	P66057	50S ribosomal protein L11 OS=Mycobacterium bovis (strain ATCC BAA-935 / AF2122/97) GN=rplK PE=3 SV=1	0	38.5233	40.1408	4	8	4	1	142	14.994	9.51	22.1261	4
FALSE	High	Master Protein	A0A0H3MAD8	Aspartate-semialdehyde dehydrogenase OS=Mycobacterium bovis (strain BCG / Pasteur 1173P2) GN=asd PE=3 SV=1	0	38.0575	45.7971	11	14	11	1	345	36.208	5.03	32.1883	11
FALSE	High	Master Protein	A0A0K2HTE8	Enoyl-CoA hydratase EchA6 OS=Mycobacterium bovis BCG GN=RN06_1127 PE=3 SV=1	0	37.4444	65.8436	9	12	9	1	243	26.012	6.4	31.9279	9
FALSE	High	Master Protein	A0A083VRX6	Superoxide dismutase OS=Mycobacterium bovis GN=BOVR_20040 PE=3 SV=1	0	37.4444	41.5459	5	9	5	1	207	23.008	6.44	29.1506	5
FALSE	High	Master Protein	A0A0Y1CK43	Cell wall synthesis protein Wag31 OS=Mycobacterium bovis BCG GN=RN06_2632 PE=4 SV=1	0	37.4132	40.7692	10	11	10	1	260	28.26	4.89	28.4304	10
FALSE	High	Master Protein	A0A0H3P4A2	PROBABLE FATTY ACID SYNTHASE FAS (FATTY ACID SYNTHETASE) OS=Mycobacterium bovis (strain ATCC BAA-935 / AF2122/97) GN=fas PE=4 SV=1	0	36.4423	6.64712	13	13	13	1	3069	326.106	5.17	25.0095	13
FALSE	High	Master Protein	Q6SA89	Putative transcriptional regulator CRP OS=Mycobacterium bovis BCG GN=RN06_4483 PE=4 SV=1	0	36.3465	45.5357	7	9	7	1	224	24.759	9.95	21.9496	7
FALSE	High	Master Protein	A0A083W1K1	ATP-dependent Clp protease ATP-binding subunit ClpX OS=Mycobacterium bovis GN=clpX PE=3 SV=1	0	36.1324	32.3944	8	10	8	1	426	46.753	5.16	21.1729	8
FALSE	High	Master Protein	A0A0D1Q5I8	35 kDa protein OS=Mycobacterium bovis GN=BOVR_14180 PE=4 SV=1	0	35.9983	58.8889	9	14	9	1	270	29.24	5.96	26.6297	9
FALSE	High	Master Protein	A0A083WDN7	Transcription termination factor Rho OS=Mycobacterium bovis GN=rho PE=3 SV=1	0	35.5295	33.5548	11	16	11	1	602	65.094	5.76	22.9091	11
FALSE	High	Master Protein	A0A0C7DNC7	Transcriptional regulator, IclR family OS=Mycobacterium bovis GN=MBO1_02758 PE=4 SV=1	0	35.4534	38.2022	8	9	8	1	267	28.251	10.18	22.3458	8
FALSE	High	Master Protein	A0A083WDP9	ATP synthase gamma chain OS=Mycobacterium bovis GN=atpG PE=3 SV=1	0	34.8164	46.2295	9	10	9	1	305	33.869	5.48	22.7364	9
FALSE	High	Master Protein	P59953	Serine hydroxymethyltransferase 1 OS=Mycobacterium bovis (strain ATCC BAA-935 / AF2122/97) GN=glyA1 PE=3 SV=2	0	34.6759	29.4521	10	12	10	1	438	46.159	6.6	18.7867	10
FALSE	High	Master Protein	A0A0H3P1M6	PROBABLE SUCCINATE DEHYDROGENASE [IRON-SULFUR SUBUNIT] (SUCCINIC DEHYDROGENASE) OS=Mycobacterium bovis (strain ATCC BAA-935 / AF2122/97) GN=Mb0253c PE=4 SV=1	0	34.2804	43.5484	8	11	8	1	248	28.607	6.25	19.3598	8
FALSE	High	Master Protein	A1KEU8	Maltokinase OS=Mycobacterium bovis (strain BCG / Pasteur 1173P2) GN=mak PE=3 SV=1	0	34.2695	34.0659	9	11	9	1	455	49.858	5.2	22.0174	9
FALSE	High	Master Protein	A0A0H4YD15	3-isopropylmalate dehydratase small subunit OS=Mycobacterium bovis GN=leuD PE=3 SV=1	0	34.107	59.0909	7	8	7	1	198	21.766	5.27	18.1752	7
FALSE	High	Master Protein	Q7U0Z0	Succinyl-CoA ligase [ADP-forming] subunit alpha OS=Mycobacterium bovis (strain ATCC BAA-935 / AF2122/97) GN=sucD PE=3 SV=1	0	34.0278	46.5347	8	13	8	1	303	31.181	5.85	32.8791	8
FALSE	High	Master Protein	A0A0H3P429	Conserved protein OS=Mycobacterium bovis (strain ATCC BAA-935 / AF2122/97) GN=Mb2080 PE=4 SV=1	0	33.8225	52.7426	11	13	11	1	237	25.167	9.41	22.9475	11
FALSE	High	Master Protein	A0A0H3M7U0	Phenolpthiocerol synthesis type-I polyketide synthase ppsA OS=Mycobacterium bovis (strain BCG / Pasteur 1173P2) GN=ppsA PE=4 SV=1	0	33.8211	7.40938	8	10	7	1	1876	198.725	5.34	16.6875	8
FALSE	High	Master Protein	A0A0H3M0V2	Probable conserved MCE associated membrane protein OS=Mycobacterium bovis (strain BCG / Pasteur 1173P2) GN=BCG_0215 PE=4 SV=1	0	33.6505	43.8525	7	7	7	1	244	25.896	5.78	23.5615	7
FALSE	High	Master Protein	A0A0C7DKH7	Indole-3-glycerol phosphate synthase OS=Mycobacterium bovis GN=trpC PE=3 SV=1	0	33.3114	40.0709	8	9	8	1	282	28.867	5.26	23.4556	8
FALSE	High	Master Protein	A0A109S6S2	Oxidoreductase OS=Mycobacterium bovis BCG GN=RN06_1154 PE=4 SV=1	0	33.0221	47.9866	8	12	8	1	298	30.587	6.64	19.6915	8
FALSE	High	Master Protein	A0A120IPS6	Phthiotriol/phenolphthiotriol dimycocerosates methyltransferase OS=Mycobacterium bovis BCG GN=RN06_3579 PE=4 SV=1	0	32.9861	63.3333	12	13	12	1	270	30.632	7.56	20.3401	12
FALSE	High	Master Protein	A0A0C7DCP8	50S ribosomal protein L3 OS=Mycobacterium bovis GN=rplC PE=3 SV=1	0	32.946	50.2262	8	13	8	1	221	23.549	10.3	20.747	8
FALSE	High	Master Protein	A0A0H3M4Y2	Probable 3-oxoacyl-[acyl-carrier protein] reductase fabG1 OS=Mycobacterium bovis (strain BCG / Pasteur 1173P2) GN=fabG1 PE=4 SV=1	0	32.5322	51.8219	7	11	7	1	247	25.681	8.7	23.134	7
FALSE	High	Master Protein	A0A0H3M5J1	Probable serine protease htrA OS=Mycobacterium bovis (strain BCG / Pasteur 1173P2) GN=htrA PE=4 SV=1	0	32.4999	25	9	11	9	1	528	54.15	5.16	25.3383	9
FALSE	High	Master Protein	A0A0H3MAR7	Two component sensory transduction transcriptional regulatory protein mtrA OS=Mycobacterium bovis (strain BCG / Pasteur 1173P2) GN=mtrA PE=4 SV=1	0	32.4628	69.2982	10	11	10	1	228	25.263	5.55	15.5989	10
FALSE	High	Master Protein	A1KMW6	Uncharacterized oxidoreductase BCG_2993 OS=Mycobacterium bovis (strain BCG / Pasteur 1173P2) GN=BCG_2993 PE=3 SV=1	0	32.4601	40.7801	9	11	9	1	282	30.368	4.88	19.3911	9
FALSE	High	Master Protein	A0A0C7DQ69	50S ribosomal protein L4 OS=Mycobacterium bovis GN=rplD PE=3 SV=1	0	32.4157	44.6429	7	9	7	1	224	23.86	10.13	15.4558	7
FALSE	High	Master Protein	P0A603	RNA polymerase sigma factor SigA OS=Mycobacterium bovis (strain ATCC BAA-935 / AF2122/97) GN=sigA PE=3 SV=1	0	32.3016	17.6136	7	8	7	1	528	57.765	4.86	16.9884	7
FALSE	High	Master Protein	A0A0H3P2Y9	TRANSMEMBRANE SERINE/THREONINE-PROTEIN KINASE D PKNDa [FIRST PART] (PROTEIN KINASE D) (STPK D) OS=Mycobacterium bovis (strain ATCC BAA-935 / AF2122/97) GN=pknDa PE=3 SV=1	0	32.111	45.3608	8	12	8	1	291	31.409	6.62	20.1412	8
FALSE	High	Master Protein	P0A4X1	NADP-dependent alcohol dehydrogenase C OS=Mycobacterium bovis (strain ATCC BAA-935 / AF2122/97) GN=adhC PE=3 SV=1	0	31.9373	43.9306	10	12	10	1	346	37.052	5.3	18.7281	10
FALSE	High	Master Protein	A0A0H3M4X5	Hypothetical invasion protein OS=Mycobacterium bovis (strain BCG / Pasteur 1173P2) GN=BCG_1539 PE=4 SV=1	0	31.8378	25.6356	7	10	7	1	472	49.777	9.01	21.3725	7
FALSE	High	Master Protein	A0A0M4NGB5	Uncharacterized protein OS=Mycobacterium bovis GN=BOVR_09400 PE=4 SV=1	0	31.8066	27.3171	6	7	6	1	410	40.02	4.45	21.1231	6
FALSE	High	Master Protein	Q7TYJ1	Trigger factor OS=Mycobacterium bovis (strain ATCC BAA-935 / AF2122/97) GN=tig PE=3 SV=1	0	31.5834	31.3305	8	8	8	1	466	50.602	4.55	18.1808	8
FALSE	High	Master Protein	A0A120IPR7	Polyribonucleotide nucleotidyltransferase OS=Mycobacterium bovis BCG GN=pnp PE=3 SV=1	0	31.3506	27.5485	13	14	13	1	824	87.349	5.11	17.8484	13
FALSE	High	Master Protein	A0A083W9M0	Bifunctional diaminohydroxyphosphoribosylaminopyrimidine deaminase/5-amino-6-(5-phosphoribosylamino)uracil reductase OS=Mycobacterium bovis GN=BOVR_07480 PE=4 SV=1	0	31.3107	43.3628	8	9	8	1	339	35.361	6.65	21.3963	8
FALSE	High	Master Protein	C1AN82	Phosphoglycerate kinase OS=Mycobacterium bovis (strain BCG / Tokyo 172 / ATCC 35737 / TMC 1019) GN=pgk PE=3 SV=1	0	31.1373	36.165	8	10	8	1	412	42.486	5	19.1212	8
FALSE	High	Master Protein	A0A0H3P5Q7	POSSIBLE SOJ/PARA-RELATED PROTEIN OS=Mycobacterium bovis (strain ATCC BAA-935 / AF2122/97) GN=Mb3239c PE=4 SV=1	0	31.1358	30.8271	7	10	7	1	266	28.558	7.42	16.1839	7
FALSE	High	Master Protein	A0A083WHM1	3-hydroxyacyl-CoA dehydrogenase OS=Mycobacterium bovis GN=BOVR_04550 PE=4 SV=1	0	31.1276	20.5556	9	12	9	1	720	76.086	5.57	21.6013	9
FALSE	High	Master Protein	A0A0H3M3E8	Citrate synthase OS=Mycobacterium bovis (strain BCG / Pasteur 1173P2) GN=gltA2 PE=3 SV=1	0	30.9125	25.7541	8	9	8	1	431	47.918	5.62	24.0078	8
FALSE	High	Master Protein	A0A109SB20	DNA topoisomerase 1 OS=Mycobacterium bovis BCG GN=topA PE=3 SV=1	0	30.813	17.4832	11	11	11	1	1041	114.264	9.14	19.5995	11
FALSE	High	Master Protein	P0A5P1	Cyclopropane mycolic acid synthase 2 OS=Mycobacterium bovis (strain ATCC BAA-935 / AF2122/97) GN=cmaA2 PE=3 SV=1	0	30.7712	48.3444	10	15	10	1	302	34.638	5.29	23.3537	10
FALSE	High	Master Protein	A0A083WKU1	Uncharacterized protein OS=Mycobacterium bovis GN=MBO1_00204 PE=4 SV=1	0	30.765	30.3977	7	9	7	1	352	36.572	5.6	21.8016	7
FALSE	High	Master Protein	A0A0M4N286	Dihydrolipoamide acetyltransferase OS=Mycobacterium bovis GN=BOVR_11465 PE=4 SV=1	0	30.763	31.4647	9	12	9	1	553	57.039	5.02	26.7426	9
FALSE	High	Master Protein	A0A083VXA8	3-isopropylmalate dehydratase large subunit OS=Mycobacterium bovis GN=leuC PE=3 SV=1	0	30.4013	33.6152	11	15	11	1	473	50.167	5.59	17.4949	11
FALSE	High	Master Protein	P0A5Y7	Enoyl-[acyl-carrier-protein] reductase [NADH] OS=Mycobacterium bovis (strain ATCC BAA-935 / AF2122/97) GN=inhA PE=3 SV=1	0	30.3469	38.6617	6	11	6	1	269	28.51	6.13	22.7686	6
FALSE	High	Master Protein	A0A0H3P8G3	Phospho-2-dehydro-3-deoxyheptonate aldolase OS=Mycobacterium bovis (strain ATCC BAA-935 / AF2122/97) GN=aroG PE=3 SV=1	0	29.9811	45.2381	11	13	11	1	462	50.624	5.76	24.1483	11
FALSE	High	Master Protein	A0A0H3P690	Conserved protein OS=Mycobacterium bovis (strain ATCC BAA-935 / AF2122/97) GN=Mb1761c PE=4 SV=1	0	29.7964	51.0989	6	10	6	1	182	19.387	5.29	24.4714	6
FALSE	High	Master Protein	C1AKX4	50S ribosomal protein L1 OS=Mycobacterium bovis (strain BCG / Tokyo 172 / ATCC 35737 / TMC 1019) GN=rplA PE=3 SV=1	0	29.7756	42.9787	6	8	6	1	235	24.711	9.74	22.5014	6
FALSE	High	Master Protein	A0A0C7DTD0	Pyridoxal 5'-phosphate synthase subunit PdxS OS=Mycobacterium bovis GN=pdxS PE=3 SV=1	0	29.6221	32.3529	7	10	7	1	306	32.005	5.53	20.1356	7
FALSE	High	Master Protein	A0A083VY01	Lipase OS=Mycobacterium bovis GN=BOVR_15365 PE=4 SV=1	0	29.5812	24.4681	5	8	5	1	376	40.11	6.4	20.6433	5
FALSE	High	Master Protein	A0A0H4XXV7	Acyl-CoA synthetase OS=Mycobacterium bovis GN=BOVR_15255 PE=4 SV=1	0	29.483	28.2714	9	11	9	1	619	67.434	6.43	15.2403	9
FALSE	High	Master Protein	A0A083WCI6	Acyl-CoA synthetase OS=Mycobacterium bovis GN=BOVR_06350 PE=4 SV=1	0	29.4709	18.3932	6	11	6	1	473	49.49	6.38	13.0762	6
FALSE	High	Master Protein	Q7U1K2	UPF0336 protein Mb0656 OS=Mycobacterium bovis (strain ATCC BAA-935 / AF2122/97) GN=Mb0656 PE=3 SV=1	0	29.2933	50	6	10	6	1	166	18.917	5.4	18.6406	6
FALSE	High	Master Protein	A0A0H3M8W5	Probable acyl-[acyl-carrier protein] desaturase desA1 OS=Mycobacterium bovis (strain BCG / Pasteur 1173P2) GN=desA1 PE=4 SV=1	0	29.2525	41.716	10	13	10	1	338	38.746	6.7	21.972	10
FALSE	High	Master Protein	A0A0K2I1G4	30S ribosomal protein S4 OS=Mycobacterium bovis BCG GN=rpsD PE=3 SV=1	0	29.218	71.6418	11	13	11	1	201	23.461	10.02	20.723	11
FALSE	High	Master Protein	A0A0C7DDJ0	Haloalkane dehalogenase OS=Mycobacterium bovis GN=dhmA PE=3 SV=1	0	29.0998	32.2785	8	9	8	1	316	35.159	6.71	19.2221	8
FALSE	High	Master Protein	A0A0H3P365	PROBABLE QUINONE REDUCTASE QOR (NADPH:quinone reductase) (Zeta-crystallin homolog protein) OS=Mycobacterium bovis (strain ATCC BAA-935 / AF2122/97) GN=qor PE=4 SV=1	0	29.0786	26.8293	5	9	5	1	328	34.026	5.62	20.6489	5
FALSE	High	Master Protein	A0A109S9M5	Uncharacterized protein OS=Mycobacterium bovis BCG GN=RN06_3724 PE=3 SV=1	0	29.048	48.8599	9	10	9	1	307	33.08	4.89	20.5171	9
FALSE	High	Master Protein	A0A0M4NCA1	SAM-dependent methyltransferase OS=Mycobacterium bovis GN=BOVR_08850 PE=4 SV=1	0	29.0186	31.7269	6	8	6	1	249	27.24	6.65	21.1769	6
FALSE	High	Master Protein	A0A109S7K8	Uncharacterized protein OS=Mycobacterium bovis BCG GN=RN06_2070 PE=4 SV=1	0	28.9884	26.5116	6	7	5	1	430	46.112	5.91	17.2175	6
FALSE	High	Master Protein	A0A0H3M776	Uncharacterized protein OS=Mycobacterium bovis (strain BCG / Pasteur 1173P2) GN=BCG_0091 PE=4 SV=1	0	28.9496	32.6705	7	8	7	1	352	38.539	6.71	13.0545	7
FALSE	High	Master Protein	A0A0K2HSR9	30S ribosomal protein S7 OS=Mycobacterium bovis BCG GN=rpsG PE=3 SV=1	0	28.7157	57.6923	9	11	9	1	156	17.59	10.56	24.3359	9
FALSE	High	Master Protein	P67211	Putative diacyglycerol O-acyltransferase Mb3761c OS=Mycobacterium bovis (strain ATCC BAA-935 / AF2122/97) GN=Mb3761c PE=3 SV=1	0	28.673	33.2599	8	10	8	1	454	49.273	6.86	16.9837	8
FALSE	High	Master Protein	A0A0H4XNZ8	Putative sporulation transcription regulator WhiA OS=Mycobacterium bovis GN=whiA PE=3 SV=1	0	28.6522	43.1193	10	13	10	1	327	35.114	9.95	21.9848	10
FALSE	High	Master Protein	A0A0H3MFS5	Putative cytoplasmic peptidase pepQ OS=Mycobacterium bovis (strain BCG / Pasteur 1173P2) GN=pepQ PE=4 SV=1	0	28.6505	30.6452	6	7	6	1	372	38.767	5.45	16.1556	6
FALSE	High	Master Protein	A0A0H4XZ09	L-lysine 6-transaminase OS=Mycobacterium bovis GN=BOVR_17050 PE=4 SV=1	0	28.3329	27.6169	9	11	9	1	449	48.981	6	19.6089	9
FALSE	High	Master Protein	A0A0Y1CB12	Mycolic acid synthase UmaA OS=Mycobacterium bovis BCG GN=RN06_0579 PE=4 SV=1	0	28.2968	36.014	9	10	8	1	286	33.074	5.1	16.6004	9
FALSE	High	Master Protein	A0A0M3TNC0	Acyl-CoA synthetase OS=Mycobacterium bovis GN=BOVR_02100 PE=4 SV=1	0	28.1013	27.6923	9	9	2	1	585	63.789	6.39	17.7536	9
FALSE	High	Master Protein	A0A0H3M2N0	Probable nad(P) transhydrogenase (Subunit alpha) pntAa [first part] OS=Mycobacterium bovis (strain BCG / Pasteur 1173P2) GN=pntAa PE=4 SV=1	0	27.7892	28.6885	7	8	7	1	366	37.671	5.02	19.2374	7
FALSE	High	Master Protein	A0A0K2HRE4	Transcriptional regulator OS=Mycobacterium bovis BCG GN=RN06_0323 PE=4 SV=1	0	27.6925	33.5958	8	9	8	1	381	40.707	7.11	22.5561	8
FALSE	High	Master Protein	C1AKK4	Glutamate-1-semialdehyde 2,1-aminomutase OS=Mycobacterium bovis (strain BCG / Tokyo 172 / ATCC 35737 / TMC 1019) GN=hemL PE=3 SV=1	0	27.6815	26.6234	5	7	5	1	462	47.486	6.35	17.4805	5
FALSE	High	Master Protein	A0A083VVT8	3-phosphoshikimate 1-carboxyvinyltransferase OS=Mycobacterium bovis GN=aroA PE=3 SV=1	0	27.5851	25.7778	7	9	7	1	450	46.378	8.56	17.6361	7
FALSE	High	Master Protein	A0A120IQS1	Fatty acid synthase OS=Mycobacterium bovis BCG GN=RN06_4536 PE=4 SV=1	0	27.5314	30.9133	8	9	8	1	427	47.57	6.8	20.7378	8
FALSE	High	Master Protein	A0A0C7DM37	Phosphoglycerate mutase family protein OS=Mycobacterium bovis GN=MBO1_03057 PE=4 SV=1	0	27.4813	45.614	6	7	6	1	228	24.574	6.68	22.1999	6
FALSE	High	Master Protein	A1KGK0	50S ribosomal protein L6 OS=Mycobacterium bovis (strain BCG / Pasteur 1173P2) GN=rplF PE=3 SV=1	0	27.4762	26.8156	4	7	4	1	179	19.366	10.21	20.4275	4
FALSE	High	Master Protein	A0A0K2I0U0	Propionyl-CoA carboxylase subunit beta OS=Mycobacterium bovis BCG GN=RN06_3966 PE=4 SV=1	0	27.1221	18.851	7	9	7	1	557	60.301	5.43	19.6709	7
FALSE	High	Master Protein	C1AMY5	Ribonuclease PH OS=Mycobacterium bovis (strain BCG / Tokyo 172 / ATCC 35737 / TMC 1019) GN=rph PE=3 SV=1	0	26.8888	55.5985	7	11	7	1	259	27.334	5.52	20.0467	7
FALSE	High	Master Protein	Q7U0Z1	Succinyl-CoA ligase [ADP-forming] subunit beta OS=Mycobacterium bovis (strain ATCC BAA-935 / AF2122/97) GN=sucC PE=3 SV=1	0	26.7841	38.5013	8	11	8	1	387	40.872	5.11	21.7095	8
FALSE	High	Master Protein	A0A0C7DR03	Putative oxidoreductase OS=Mycobacterium bovis GN=MBO1_00379 PE=3 SV=1	0	26.6094	40	7	10	7	1	335	36.201	8.15	18.5693	7
FALSE	High	Master Protein	A0A0G2Q9D6	DNA gyrase subunit B OS=Mycobacterium bovis (strain BCG / Pasteur 1173P2) GN=gyrB1 PE=1 SV=1	0	26.5918	16.9468	10	12	10	1	714	78.407	6.62	23.3567	10
FALSE	High	Master Protein	A0A0H3M5V0	Acetyl/propionyl-CoA carboxylase (Beta subunit) accD6 OS=Mycobacterium bovis (strain BCG / Pasteur 1173P2) GN=accD6 PE=4 SV=1	0	26.5803	26.2156	9	9	9	1	473	50.105	6.15	17.773	9
FALSE	High	Master Protein	A0A083W5Y8	ESX-5 secretion system protein EccA5 (ESX conserv ed component A5) (Type VII secretion system protein EccA5) (T7SS protein EccA5) OS=Mycobacterium bovis GN=MBO1_03755 PE=4 SV=1	0	26.4051	28.0328	10	12	10	1	610	67.714	5.48	15.3471	10
FALSE	High	Master Protein	A0A083WAT1	Acetoin dehydrogenase OS=Mycobacterium bovis GN=BOVR_06615 PE=3 SV=1	0	26.3589	30.0725	5	7	5	1	276	29.197	7.71	18.3986	5
FALSE	High	Master Protein	A0A0H3MAD0	Possible nitrogen fixation related protein OS=Mycobacterium bovis (strain BCG / Pasteur 1173P2) GN=BCG_1526 PE=4 SV=1	0	26.3201	62.3457	5	8	5	1	162	17.7	5.06	21.0912	5
FALSE	High	Master Protein	A0A0H3M823	Aminomethyltransferase OS=Mycobacterium bovis (strain BCG / Pasteur 1173P2) GN=gcvT PE=3 SV=1	0	25.7392	27.7045	7	8	7	1	379	39.604	5.4	12.0282	7
FALSE	High	Master Protein	A0A0K2I0I4	Signal recognition particle protein OS=Mycobacterium bovis BCG GN=ffh PE=3 SV=1	0	25.7266	23.619	7	7	7	1	525	54.967	8.06	19.0248	7
FALSE	High	Master Protein	A0A0C7DKX7	FHA domain-containing protein FhaA OS=Mycobacterium bovis GN=BOVR_00115 PE=4 SV=1	0	25.6697	31.094	9	10	9	1	521	55.969	5.03	15.595	9
FALSE	High	Master Protein	A0A0H3M380	Chaperone protein DnaJ OS=Mycobacterium bovis (strain BCG / Pasteur 1173P2) GN=dnaJ1 PE=3 SV=1	0	25.646	38.7342	8	12	8	1	395	41.29	8.12	20.6593	8
FALSE	High	Master Protein	A0A0C7DS58	Methylmalonate-semialdehyde dehydrogenase OS=Mycobacterium bovis GN=BOVR_03970 PE=3 SV=1	0	25.5831	24.5098	7	10	7	1	510	54.42	5.71	19.1132	7
FALSE	High	Master Protein	A0A0H3M8U4	PPE family protein OS=Mycobacterium bovis (strain BCG / Pasteur 1173P2) GN=PPE50 PE=4 SV=1	0	25.5092	24.9344	6	13	6	1	381	38.384	4.86	23.0876	6
FALSE	High	Master Protein	A0A0C7DGI3	DNA-binding protein HU homolog (21 kDa laminin-2-binding protein) (28 kDa iron-regulated protein) (Irep-28) (Histone-like protein) (Hlp) OS=Mycobacterium bovis GN=MBO1_02755 PE=3 SV=1	0	25.3664	38.3178	7	11	7	1	214	22.174	11.94	17.0029	7
FALSE	High	Master Protein	A0A0H3M7V3	Uncharacterized protein OS=Mycobacterium bovis (strain BCG / Pasteur 1173P2) GN=TB18.6 PE=4 SV=1	0	25.3244	50	5	6	5	1	176	18.622	5.73	17.4959	5
FALSE	High	Master Protein	A0A0M4P9F3	Aminotransferase OS=Mycobacterium bovis GN=BOVR_19370 PE=4 SV=1	0	25.2952	24.1685	7	8	7	1	451	48.935	5.73	16.963	7
FALSE	High	Master Protein	A0A0H3P3M2	Ppe family protein ppe26 OS=Mycobacterium bovis (strain ATCC BAA-935 / AF2122/97) GN=PPE26 PE=4 SV=1	0	25.2022	17.8117	3	9	3	1	393	38.548	4.53	20.8222	3
FALSE	High	Master Protein	A0A083WIJ7	Geranylgeranyl pyrophosphate synthase OS=Mycobacterium bovis GN=BOVR_02935 PE=3 SV=1	0	25.1636	47.1642	8	10	8	1	335	35.538	5.12	18.563	8
FALSE	High	Master Protein	A0A0H3P4I9	Conserved protein OS=Mycobacterium bovis (strain ATCC BAA-935 / AF2122/97) GN=Mb2433c PE=4 SV=1	0	25.0931	28	5	6	5	1	325	35.998	5.44	17.6943	5
FALSE	High	Master Protein	A0A0C7DT22	Probable lipid-transfer protein Ltp1 OS=Mycobacterium bovis GN=MBO_302501 PE=3 SV=1	0	25.0482	42.2604	8	10	8	1	407	43.608	5.69	19.4722	8
FALSE	High	Master Protein	A0A0H3MDY3	Virulence-regulating transcriptional regulator virS (AraC/xylS family) OS=Mycobacterium bovis (strain BCG / Pasteur 1173P2) GN=virS PE=4 SV=1	0	24.8397	29.1176	6	8	6	1	340	37.712	8.72	21.4421	6
FALSE	High	Master Protein	A0A0H3P430	Conserved protein OS=Mycobacterium bovis (strain ATCC BAA-935 / AF2122/97) GN=Mb0303c PE=4 SV=1	0	24.8031	30.7116	5	6	5	1	267	29.756	6.55	13.9558	5
FALSE	High	Master Protein	A0A0H3MEQ5	Possible dehydrogenase OS=Mycobacterium bovis (strain BCG / Pasteur 1173P2) GN=BCG_3458c PE=4 SV=1	0	24.7861	23.4483	4	6	4	1	290	30.277	5.34	13.7639	4
FALSE	High	Master Protein	A0A0H3MA85	Probable anion transporter atpase OS=Mycobacterium bovis (strain BCG / Pasteur 1173P2) GN=BCG_3739 PE=4 SV=1	0	24.7538	39.1192	8	9	8	1	386	41.378	6.09	18.0828	8
FALSE	High	Master Protein	A0A0H3M2E5	Single-stranded DNA-binding protein OS=Mycobacterium bovis (strain BCG / Pasteur 1173P2) GN=ssb PE=3 SV=1	0	24.6774	67.0732	6	10	6	1	164	17.343	5.21	19.8033	6
FALSE	High	Master Protein	A0A0H3M2Z6	Possible two component system response transcriptional positive regulator phoP OS=Mycobacterium bovis (strain BCG / Pasteur 1173P2) GN=phoP PE=4 SV=1	0	24.5461	38.4615	7	7	7	1	247	27.497	6.4	13.4899	7
FALSE	High	Master Protein	A0A083WIV8	Uncharacterized protein OS=Mycobacterium bovis GN=BOVR_02590 PE=4 SV=1	0	24.4804	41.5698	7	8	7	1	344	36.527	6.6	12.7541	7
FALSE	High	Master Protein	A0A0H3M1F9	Aldehyde dehydrogenase OS=Mycobacterium bovis (strain BCG / Pasteur 1173P2) GN=BCG_0183 PE=3 SV=1	0	24.4337	23.5178	5	6	5	1	506	55.001	9.17	16.8615	5
FALSE	High	Master Protein	A0A0K2HS29	Isocitrate lyase OS=Mycobacterium bovis BCG GN=RN06_0577 PE=4 SV=1	0	24.4125	23.3645	5	6	5	1	428	47.057	5.15	14.2341	5
FALSE	High	Master Protein	P67542	Bifunctional purine biosynthesis protein PurH OS=Mycobacterium bovis (strain ATCC BAA-935 / AF2122/97) GN=purH PE=3 SV=1	0	24.3347	27.3423	8	9	8	1	523	54.992	5.83	13.6309	8
FALSE	High	Master Protein	C1AL55	30S ribosomal protein S5 OS=Mycobacterium bovis (strain BCG / Tokyo 172 / ATCC 35737 / TMC 1019) GN=rpsE PE=3 SV=1	0	24.2406	44.5455	6	8	6	1	220	22.874	10.17	12.7731	6
FALSE	High	Master Protein	A0A0H3M655	Uncharacterized protein OS=Mycobacterium bovis (strain BCG / Pasteur 1173P2) GN=BCG_1542 PE=4 SV=1	0	24.1942	30.9148	7	9	7	1	317	34.312	8.02	17.56	7
FALSE	High	Master Protein	A0A0H3M9G6	Cyclopropane-fatty-acyl-phospholipid synthase 1 cmaA1 OS=Mycobacterium bovis (strain BCG / Pasteur 1173P2) GN=cmaA1 PE=4 SV=1	0	23.9602	36.2369	7	8	6	1	287	32.413	6.23	19.333	7
FALSE	High	Master Protein	A0A0K2HX55	ESAT-6 like protein EsxN OS=Mycobacterium bovis BCG GN=RN06_2224 PE=4 SV=1	0	23.9291	59.5745	3	6	3	1	94	9.936	4.93	13.7575	3
FALSE	High	Master Protein	A0A0H3P726	PROBABLE PEPTIDYL-PROLYL CIS-TRANS ISOMERASE B PPIB (CYCLOPHILIN) (PPIASE) (ROTAMASE) (PEPTIDYLPROLYL ISOMERASE) OS=Mycobacterium bovis (strain ATCC BAA-935 / AF2122/97) GN=ppiB PE=4 SV=1	0	23.8834	26.2987	5	7	5	1	308	32.399	9.38	19.8339	5
FALSE	High	Master Protein	A0A0H3M977	Succinate dehydrogenase flavoprotein subunit OS=Mycobacterium bovis (strain BCG / Pasteur 1173P2) GN=sdhA PE=3 SV=1	0	23.8375	17.1186	7	9	7	1	590	64.785	6.06	15.6699	7
FALSE	High	Master Protein	A0A120IQV7	Uncharacterized protein OS=Mycobacterium bovis BCG GN=RN06_4421 PE=4 SV=1	0	23.7044	42.0824	8	8	8	1	461	46.862	7.42	14.1647	8
FALSE	High	Master Protein	A0A0K2HTW1	Ribosomal RNA small subunit methyltransferase A OS=Mycobacterium bovis BCG GN=rsmA PE=3 SV=1	0	23.6884	29.9685	8	10	8	1	317	34.624	9.88	21.6123	8
FALSE	High	Master Protein	A1KGJ7	50S ribosomal protein L5 OS=Mycobacterium bovis (strain BCG / Pasteur 1173P2) GN=rplE PE=3 SV=1	0	23.6057	56.6845	7	9	7	1	187	21.006	10.1	14.4294	7
FALSE	High	Master Protein	A0A0H3P5B9	Probable penicillin-binding protein dacb2 (D-alanyl-d-alanine carboxypeptidase) (Dd-peptidase) (Dd-carboxypeptidase) (Pbp) (Dd-transpeptidase) (Serine-type d-ala-d-ala carboxypeptidase) (D-amino acid... OS=Mycobacterium bovis (strain ATCC BAA-935 / AF2122/97) GN=dacB2 PE=3 SV=1	0	23.5924	39.8625	5	11	5	1	291	29.728	5.24	22.1635	5
FALSE	High	Master Protein	A0A0K2HXP6	Glycerolphosphodiesterase OS=Mycobacterium bovis BCG GN=RN06_2794 PE=4 SV=1	0	23.553	33.5526	6	9	6	1	304	32.356	5.44	14.6295	6
FALSE	High	Master Protein	A0A0K2HWJ1	Uncharacterized protein OS=Mycobacterium bovis BCG GN=RN06_2274 PE=4 SV=1	0	23.4284	14.3279	5	6	5	1	677	69.562	4.91	14.9923	5
FALSE	High	Master Protein	P65473	UDP-N-acetylmuramate--L-alanine ligase OS=Mycobacterium bovis (strain ATCC BAA-935 / AF2122/97) GN=murC PE=3 SV=1	0	23.2699	21.4575	5	7	5	1	494	51.144	6.62	13.9151	5
FALSE	High	Master Protein	A0A0C7DSS2	Protein translocase subunit SecA OS=Mycobacterium bovis GN=secA PE=3 SV=1	0	23.2372	20.9158	8	10	8	1	808	88.897	5.45	15.5348	8
FALSE	High	Master Protein	A0A0H4XYD0	Polyketide synthase OS=Mycobacterium bovis GN=BOVR_15175 PE=4 SV=1	0	23.1983	8.53859	7	11	7	1	1827	193.119	5.67	21.4743	7
FALSE	High	Master Protein	P64246	Probable glutamine synthetase 2 OS=Mycobacterium bovis (strain ATCC BAA-935 / AF2122/97) GN=glnA2 PE=3 SV=1	0	23.1255	14.7982	4	6	4	1	446	49.576	5.49	15.0423	4
FALSE	High	Master Protein	A0A0K2HS30	Serine/threonine-protein kinase PknG OS=Mycobacterium bovis BCG GN=RN06_0511 PE=4 SV=1	0	23.0933	12.2667	6	8	6	1	750	81.527	5.8	12.8091	6
FALSE	High	Master Protein	A0A0H3P7K2	PROBABLE ISOCHORISMATE SYNTHASE ENTC (ISOCHORISMATE HYDROXYMUTASE) (ENTEROCHELIN BIOSYNTHESIS) OS=Mycobacterium bovis (strain ATCC BAA-935 / AF2122/97) GN=entC PE=4 SV=1	0	23.0689	41.6667	8	10	8	1	372	38.913	7.47	21.7844	8
FALSE	High	Master Protein	A0A0K2HXR7	Oxidoreductase OS=Mycobacterium bovis BCG GN=RN06_2817 PE=4 SV=1	0	22.9945	18.5915	4	5	4	1	355	38.58	9.64	13.8779	4
FALSE	High	Master Protein	A0A0H3MAY5	Possible protease IV sppA (Endopeptidase IV) OS=Mycobacterium bovis (strain BCG / Pasteur 1173P2) GN=sppA PE=4 SV=1	0	22.7029	24.8796	9	10	9	1	623	65.895	6.05	14.9493	9
FALSE	High	Master Protein	A1KGD1	50S ribosomal protein L10 OS=Mycobacterium bovis (strain BCG / Pasteur 1173P2) GN=rplJ PE=3 SV=1	0	22.6624	54.4944	6	8	6	1	178	18.467	8.1	17.601	6
FALSE	High	Master Protein	A0A0H3ME32	Probable NADH dehydrogenase I (Chain F) nuoF OS=Mycobacterium bovis (strain BCG / Pasteur 1173P2) GN=nuoF PE=4 SV=1	0	22.6504	25.1685	6	6	6	1	445	48.071	6.18	13.4844	6
FALSE	High	Master Protein	A0A0C7DAJ2	Uncharacterized protein OS=Mycobacterium bovis GN=MBO1_00413 PE=4 SV=1	0	22.5325	25	4	7	4	1	192	21.196	9.74	18.6565	4
FALSE	High	Master Protein	A0A0H3MAG0	Probable fatty-acid-CoA ligase fadD25 OS=Mycobacterium bovis (strain BCG / Pasteur 1173P2) GN=fadD25 PE=4 SV=1	0	22.5244	16.8096	6	7	5	1	583	63.129	5.38	11.7789	6
FALSE	High	Master Protein	A1KMX8	Polyphosphate kinase OS=Mycobacterium bovis (strain BCG / Pasteur 1173P2) GN=ppk PE=3 SV=1	0	22.4663	14.2857	7	7	7	1	742	82.988	5.77	17.3236	7
FALSE	High	Master Protein	A1KHG1	Enolase OS=Mycobacterium bovis (strain BCG / Pasteur 1173P2) GN=eno PE=3 SV=1	0	22.2819	24.7086	6	8	6	1	429	44.835	4.63	17.7123	6
FALSE	High	Master Protein	A0A0G2Q9E8	Probable chromosome partitioning protein parB OS=Mycobacterium bovis (strain BCG / Pasteur 1173P2) GN=parB_2 PE=3 SV=1	0	22.2807	28.4884	5	7	5	1	344	36.996	7.28	13.5223	5
FALSE	High	Master Protein	P63976	DNA polymerase III subunit gamma/tau OS=Mycobacterium bovis (strain ATCC BAA-935 / AF2122/97) GN=dnaX PE=3 SV=1	0	22.1633	27.3356	9	12	9	1	578	61.885	5.88	17.2803	9
FALSE	High	Master Protein	A0A0H4YAI8	Catalase-peroxidase OS=Mycobacterium bovis GN=katG PE=3 SV=1	0	22.1538	21.7568	8	9	8	1	740	80.511	5.21	14.3813	8
FALSE	High	Master Protein	A0A0C7DQ77	30S ribosomal protein S8 OS=Mycobacterium bovis GN=rpsH PE=3 SV=1	0	22.1263	56.2963	6	8	6	1	135	14.684	8.54	11.7572	6
FALSE	High	Master Protein	A0A0C7DMM4	NADH-quinone oxidoreductase subunit I OS=Mycobacterium bovis GN=nuoI PE=3 SV=1	0	22.0757	41.7431	6	8	6	1	218	24.317	7.62	11.8005	6
FALSE	High	Master Protein	A0A083VR97	Ferritin OS=Mycobacterium bovis GN=BOVR_20010 PE=4 SV=1	0	21.8622	41.989	7	7	7	1	181	20.429	4.83	16.5166	7
FALSE	High	Master Protein	P0A5X7	30S ribosomal protein S3 OS=Mycobacterium bovis (strain ATCC BAA-935 / AF2122/97) GN=rpsC PE=3 SV=2	0	21.6192	28.4672	5	6	5	1	274	30.002	10.14	15.0606	5
FALSE	High	Master Protein	P64179	Glyceraldehyde-3-phosphate dehydrogenase OS=Mycobacterium bovis (strain ATCC BAA-935 / AF2122/97) GN=gap PE=3 SV=1	0	21.5406	30.3835	7	7	7	1	339	35.934	5.45	13.3395	7
FALSE	High	Master Protein	A0A083WMB8	Aminoglycoside 2'-N-acetyltransferase OS=Mycobacterium bovis GN=BOVR_01380 PE=4 SV=1	0	21.5263	23.7569	4	7	4	1	181	20.025	6.8	19.3043	4
FALSE	High	Master Protein	A0A0H3M379	Uncharacterized protein OS=Mycobacterium bovis (strain BCG / Pasteur 1173P2) GN=BCG_1169c PE=4 SV=1	0	21.5013	35.8491	5	5	5	1	212	22.973	5.97	9.65263	5
FALSE	High	Master Protein	A0A0H3M6F0	Uncharacterized protein OS=Mycobacterium bovis (strain BCG / Pasteur 1173P2) GN=BCG_2488c PE=4 SV=1	0	21.4931	66.4671	6	7	6	1	167	17.278	5.26	12.51	6
FALSE	High	Master Protein	A0A083W0K1	3-ketoacyl-ACP reductase OS=Mycobacterium bovis GN=BOVR_14290 PE=4 SV=1	0	21.4655	33.8462	5	6	5	1	260	27.123	5.94	16.5145	5
FALSE	High	Master Protein	P0C2T1	Diacylglycerol acyltransferase/mycolyltransferase Ag85A OS=Mycobacterium bovis (strain ATCC BAA-935 / AF2122/97) GN=fbpA PE=3 SV=1	0	21.3853	13.3136	4	5	4	1	338	35.664	6.55	15.8821	4
FALSE	High	Master Protein	A0A0K2HWL6	Fatty-acid--CoA ligase FadD31 OS=Mycobacterium bovis BCG GN=RN06_2386 PE=4 SV=1	0	21.3644	22.2581	7	8	7	1	620	66.269	5.71	14.8938	7
FALSE	High	Master Protein	A0A0C7DN95	3 beta-hydroxysteroid dehydrogenase/Delta 5-->4-i somerase (Cholesterol dehydrogenase) OS=Mycobacterium bovis GN=MBO_301529 PE=4 SV=1	0	21.2941	13.5135	3	5	3	1	370	40.686	7.01	13.4056	3
FALSE	High	Master Protein	A0A083W8A5	Uncharacterized protein OS=Mycobacterium bovis GN=BOVR_10335 PE=4 SV=1	0	21.1353	27.5194	4	6	4	1	258	27.306	4.92	16.8104	4
FALSE	High	Master Protein	P65307	Putative phthiocerol dimycocerosate transporter LppX OS=Mycobacterium bovis (strain ATCC BAA-935 / AF2122/97) GN=lppX PE=3 SV=1	0	21.0296	34.7639	4	6	4	1	233	24.125	5.22	16.2954	4
FALSE	High	Master Protein	A0A0H4XXF5	Pyridoxal 5'-phosphate synthase subunit PdxT OS=Mycobacterium bovis GN=pdxT PE=3 SV=1	0	21.0228	37.3737	4	5	4	1	198	21.059	5.58	13.7135	4
FALSE	High	Master Protein	A0A093N7V4	S-adenosyl-L-methionine-dependent methyltransferase OS=Mycobacterium bovis GN=BOVR_00775 PE=3 SV=1	0	20.9952	34.8243	6	9	5	1	313	34.284	5.27	18.6997	6
FALSE	High	Master Protein	A0A0Y1BJ37	Chaperone protein ClpB OS=Mycobacterium bovis BCG GN=clpB PE=3 SV=1	0	20.9802	20.8726	8	9	7	1	848	92.512	5.34	13.7045	8
FALSE	High	Master Protein	A0A083WCH2	Aminotransferase, putative OS=Mycobacterium bovis GN=BOVR_06280 PE=3 SV=1	0	20.8527	34.2541	6	6	6	1	362	37.739	6.18	10.3894	6
FALSE	High	Master Protein	A0A0H4FYQ9	Adenylyltransferase/sulfurtransferase OS=Mycobacterium bovis BCG GN=RN06_3882 PE=4 SV=1	0	20.8037	32.1429	8	9	8	1	392	42.147	5.5	17.881	8
FALSE	High	Master Protein	A0A0H3P3Z4	Probable 3-hydroxyacyl-thioester dehydratase htdx OS=Mycobacterium bovis (strain ATCC BAA-935 / AF2122/97) GN=htdx PE=4 SV=1	0	20.7818	31.4286	5	6	5	1	280	30.176	10.04	12.1742	5
FALSE	High	Master Protein	A0A0H3P5T6	Conserved protein OS=Mycobacterium bovis (strain ATCC BAA-935 / AF2122/97) GN=Mb3230c PE=4 SV=1	0	20.6513	44.1781	9	10	9	1	292	31.332	6.81	15.0452	9
FALSE	High	Master Protein	A0A083VZD4	Glutamine ABC transporter permease OS=Mycobacterium bovis GN=BOVR_13320 PE=3 SV=1	0	20.6247	36.9628	7	9	7	1	349	36.003	9.96	10.2622	7
FALSE	High	Master Protein	A1KGW3	Putative S-adenosyl-L-methionine-dependent methyltransferase BCG_0883 OS=Mycobacterium bovis (strain BCG / Pasteur 1173P2) GN=BCG_0883 PE=3 SV=1	0	20.4118	32.2259	6	6	6	1	301	33.395	4.61	10.6148	6
FALSE	High	Master Protein	A0A0H4XX18	2-oxoglutarate ferredoxin oxidoreductase subunit alpha OS=Mycobacterium bovis GN=BOVR_12725 PE=4 SV=1	0	20.3967	14.8936	5	8	5	1	658	69.597	5.47	10.5698	5
FALSE	High	Master Protein	A0A083VUN3	Cholesterol oxidase OS=Mycobacterium bovis GN=BOVR_17855 PE=4 SV=1	0	20.3877	15.917	5	7	5	1	578	62.984	9.31	12.2268	5
FALSE	High	Master Protein	A0A0K2HXK9	Adenosine kinase OS=Mycobacterium bovis BCG GN=RN06_2703 PE=4 SV=1	0	20.3535	33.3333	5	9	5	1	324	34.45	4.89	18.2287	5
FALSE	High	Master Protein	A0A0H3MAT7	Probable acyl-CoA dehydrogenase fadE25 OS=Mycobacterium bovis (strain BCG / Pasteur 1173P2) GN=fadE25 PE=3 SV=1	0	20.3132	21.0797	6	6	6	1	389	41.697	5.34	12.9828	6
FALSE	High	Master Protein	A0A0H3M746	Transmembrane serine/threonine-protein kinase B pknB OS=Mycobacterium bovis (strain BCG / Pasteur 1173P2) GN=pknB PE=3 SV=1	0	20.2476	24.7604	8	8	8	1	626	66.469	5.45	10.5234	8
FALSE	High	Master Protein	A0A0C7DRS2	Long-chain-fatty-acid--AMP ligase FadD30 (FAAL) (Acyl-AMP synthetase) OS=Mycobacterium bovis GN=MBO_302026 PE=4 SV=1	0	20.1772	22.3932	8	8	1	1	585	63.783	6.39	11.5296	8
FALSE	High	Master Protein	A0A0H3P448	Conserved transmembrane protein OS=Mycobacterium bovis (strain ATCC BAA-935 / AF2122/97) GN=Mb2063c PE=4 SV=1	0	20.1766	43.2099	7	8	7	1	324	34.727	5.38	12.3637	7
FALSE	High	Master Protein	A0A083WDP1	Threonylcarbamoyl-AMP synthase OS=Mycobacterium bovis GN=BOVR_06905 PE=4 SV=1	0	20.1705	41.9355	4	4	4	1	217	22.588	4.97	11.1954	4
FALSE	High	Master Protein	A0A0H3P7F8	Nadph:adrenodoxin oxidoreductase fpra (Nadph-ferredoxin reductase) OS=Mycobacterium bovis (strain ATCC BAA-935 / AF2122/97) GN=fprA PE=4 SV=1	0	20.1699	20.3947	7	8	7	1	456	49.326	5.68	16.1183	7
FALSE	High	Master Protein	A0A120IR57	Peptidoglycan biosynthesis protein OS=Mycobacterium bovis BCG GN=RN06_4766 PE=4 SV=1	0	20.0186	13.0912	6	6	6	1	1184	123.459	7.42	8.11653	6
FALSE	High	Master Protein	A0A0H3M796	Uncharacterized protein OS=Mycobacterium bovis (strain BCG / Pasteur 1173P2) GN=BCG_0121 PE=4 SV=1	0	19.9657	29.0179	5	7	5	1	224	24.634	10.61	13.103	5
FALSE	High	Master Protein	A0A0K2HXR1	Cystathionine beta-lyase OS=Mycobacterium bovis BCG GN=RN06_2811 PE=4 SV=1	0	19.8599	31.2039	7	7	7	1	407	44.256	6.2	6.62588	7
FALSE	High	Master Protein	A0A0C7DN15	Uncharacterized protein OS=Mycobacterium bovis GN=MBO1_02739 PE=4 SV=1	0	19.6307	37.1648	5	6	5	1	261	27.53	6.01	11.11	5
FALSE	High	Master Protein	A0A0H3M2K8	Probable serine protease pepA OS=Mycobacterium bovis (strain BCG / Pasteur 1173P2) GN=pepA PE=4 SV=1	0	19.6104	17.1831	4	4	4	1	355	34.905	5.33	14.0714	4
FALSE	High	Master Protein	P59989	Putative thiosulfate sulfurtransferase 1 OS=Mycobacterium bovis (strain ATCC BAA-935 / AF2122/97) GN=cysA1 PE=3 SV=1	0	19.5253	39.7112	7	8	7	1	277	30.996	5.33	14.6921	7
FALSE	High	Master Protein	A0A0C7DG24	Uncharacterized protein OS=Mycobacterium bovis GN=MBO1_02690 PE=4 SV=1	0	19.4989	24.2915	4	5	4	1	247	27.139	4.84	10.9408	4
FALSE	High	Master Protein	A0A0C7DEZ2	Prokaryotic ubiquitin-like protein Pup OS=Mycobacterium bovis GN=pup PE=3 SV=1	0	19.4465	69.0141	4	4	4	1	71	7.755	4.32	12.2512	4
FALSE	High	Master Protein	A0A0D1Q058	Esterase OS=Mycobacterium bovis GN=BOVR_04095 PE=4 SV=1	0	19.433	19.802	4	6	4	1	303	30.619	6.68	10.1435	4
FALSE	High	Master Protein	A0A0H3M737	Iron-dependent repressor and activator ideR OS=Mycobacterium bovis (strain BCG / Pasteur 1173P2) GN=ideR PE=4 SV=1	0	19.3654	41.3043	5	6	5	1	230	25.217	5.36	19.433	5
FALSE	High	Master Protein	A0A0C7DQ43	Uncharacterized protein Rv0647c/MT0675 OS=Mycobacterium bovis GN=MBO1_00477 PE=4 SV=1	0	19.3588	20.6967	7	8	7	1	488	54.82	7.52	14.1329	7
FALSE	High	Master Protein	A0A0H3P444	POSSIBLE BETA-1,3-GLUCANASE OS=Mycobacterium bovis (strain ATCC BAA-935 / AF2122/97) GN=Mb0323 PE=4 SV=1	0	19.3449	28.5714	6	9	6	1	294	32.138	5.01	20.8463	6
FALSE	High	Master Protein	A0A0H3M6W0	Probable conserved membrane protein OS=Mycobacterium bovis (strain BCG / Pasteur 1173P2) GN=BCG_1815 PE=4 SV=1	0	19.3443	25.0988	7	7	7	1	506	53.669	7.12	14.0416	7
FALSE	High	Master Protein	A0A0C7DC19	Enoyl-CoA hydratase echA21 OS=Mycobacterium bovis GN=MBO1_00945 PE=4 SV=1	0	19.1045	32.9932	5	8	5	1	294	31.299	5.38	10.317	5
FALSE	High	Master Protein	A0A109SBJ2	ESX-1 secretion-associated protein EspL OS=Mycobacterium bovis BCG GN=RN06_4723 PE=3 SV=1	0	18.9919	62.6087	3	6	3	1	115	12.192	4.84	13.1209	3
FALSE	High	Master Protein	A0A083W979	Urease accessory protein UreG OS=Mycobacterium bovis GN=ureG PE=3 SV=1	0	18.9709	35.7143	5	5	5	1	224	23.334	5.3	13.918	5
FALSE	High	Master Protein	C1AGB0	3-isopropylmalate dehydrogenase OS=Mycobacterium bovis (strain BCG / Tokyo 172 / ATCC 35737 / TMC 1019) GN=leuB PE=3 SV=1	0	18.9427	27.9762	5	6	5	1	336	35.25	5.74	12.0475	5
FALSE	High	Master Protein	P0A589	Glutamine--fructose-6-phosphate aminotransferase [isomerizing] OS=Mycobacterium bovis (strain ATCC BAA-935 / AF2122/97) GN=glmS PE=3 SV=2	0	18.9003	20.3526	8	9	8	1	624	67.53	5.78	13.4515	8
FALSE	High	Master Protein	A0A109SA20	Protein translocase subunit SecA OS=Mycobacterium bovis BCG GN=secA PE=3 SV=1	0	18.8412	14.715	7	8	7	1	965	107.536	5.4	17.1078	7
FALSE	High	Master Protein	A0A109SA26	RNA polymerase sigma factor OS=Mycobacterium bovis BCG GN=RN06_3905 PE=3 SV=1	0	18.8316	20.3922	5	6	5	1	255	28.274	5.3	12.3693	5
FALSE	High	Master Protein	A0A083VSX5	Uncharacterized protein OS=Mycobacterium bovis GN=BOVR_18410 PE=4 SV=1	0	18.8193	27.4262	4	6	4	1	237	27.423	7.88	12.7469	4
FALSE	High	Master Protein	A0A0C7DDK4	Uncharacterized protein OS=Mycobacterium bovis GN=MBO1_01508 PE=4 SV=1	0	18.8073	33.3333	6	7	6	1	267	28.43	5.07	9.76482	6
FALSE	High	Master Protein	A0A0H3MFL9	Probable nad-dependent glutamate dehydrogenase gdh OS=Mycobacterium bovis (strain BCG / Pasteur 1173P2) GN=gdh PE=4 SV=1	0	18.7461	10.8441	9	9	9	1	1623	176.689	5.83	13.4845	9
FALSE	High	Master Protein	A0A0C7DNT9	Bifunctional protein GlmU OS=Mycobacterium bovis GN=glmU PE=3 SV=1	0	18.6307	12.7273	3	5	3	1	495	51.553	6.06	11.4213	3
FALSE	High	Master Protein	A0A0H3MAH2	NADH-quinone oxidoreductase OS=Mycobacterium bovis (strain BCG / Pasteur 1173P2) GN=nuoG PE=3 SV=1	0	18.6061	17.6179	7	7	7	1	806	85.359	5.59	12.8416	7
FALSE	High	Master Protein	A0A0H3M8Z8	Probable glutamine-transport ATP-binding protein ABC transporter glnQ OS=Mycobacterium bovis (strain BCG / Pasteur 1173P2) GN=glnQ PE=4 SV=1	0	18.5525	32.1212	7	9	7	1	330	35.407	5.58	11.9686	7
FALSE	High	Master Protein	A0A0C7DNF1	Molybdopterin biosynthesis protein OS=Mycobacterium bovis GN=MBO1_02097 PE=4 SV=1	0	18.5316	35.7143	5	5	5	1	182	18.561	4.68	13.3067	5
FALSE	High	Master Protein	A0A083W761	Proteasome-associated ATPase OS=Mycobacterium bovis GN=mpa PE=3 SV=1	0	18.5213	16.5846	5	6	5	1	609	67.36	5.01	13.4623	5
FALSE	High	Master Protein	A0A0C7DB73	Magnesium chelatase, putative (Probable methanol dehydrogenase transcriptional regulatory protein MoxR2) OS=Mycobacterium bovis GN=MBO1_00865 PE=4 SV=1	0	18.4859	39.1061	6	7	5	1	358	37.913	5.69	13.1552	6
FALSE	High	Master Protein	A0A0H3P1U0	PROBABLE UROPORPHYRIN-III C-METHYLTRANSFERASE HEMD (UROPORPHYRINOGEN III METHYLASE) (UROGEN III METHYLASE) (SUMT) (UROGEN III METHYLASE) (UROM) OS=Mycobacterium bovis (strain ATCC BAA-935 / AF2122/97) GN=hemD PE=4 SV=1	0	18.3365	15.7522	5	7	5	1	565	58.8	5.8	12.1989	5
FALSE	High	Master Protein	P0A5M3	Transcription termination/antitermination protein NusA OS=Mycobacterium bovis (strain ATCC BAA-935 / AF2122/97) GN=nusA PE=3 SV=1	0	18.2963	38.0403	8	8	8	1	347	37.619	6.9	15.1722	8
FALSE	High	Master Protein	A0A0H3P6N4	Possible acyltransferase OS=Mycobacterium bovis (strain ATCC BAA-935 / AF2122/97) GN=Mb3846c PE=4 SV=1	0	18.223	35.5212	5	5	5	1	259	28.436	10.02	9.65147	5
FALSE	High	Master Protein	A0A0K2HT88	Demethylmenaquinone methyltransferase OS=Mycobacterium bovis BCG GN=menG PE=3 SV=1	0	18.1605	40.1709	5	8	5	1	234	25.283	9.98	11.2747	5
FALSE	High	Master Protein	A0A0K2HW87	PPE family protein PPE29 OS=Mycobacterium bovis BCG GN=RN06_2234 PE=4 SV=1	0	18.1561	23.6407	3	5	3	1	423	41.451	4.89	10.8308	3
FALSE	High	Master Protein	A0A0H3M3Q9	Methionine--tRNA ligase OS=Mycobacterium bovis (strain BCG / Pasteur 1173P2) GN=metS PE=3 SV=1	0	18.053	16.185	4	5	4	1	519	57.957	5.8	11.9715	4
FALSE	High	Master Protein	A0A0H3M4D7	Probable dehydrogenase/reductase OS=Mycobacterium bovis (strain BCG / Pasteur 1173P2) GN=BCG_0822 PE=4 SV=1	0	17.8656	34.2373	6	9	6	1	295	30.427	5.24	14.3858	6
FALSE	High	Master Protein	A0A0C7DIN0	S-adenosyl-L-methionine-dependent methyltransferase OS=Mycobacterium bovis GN=MBO1_02851 PE=3 SV=1	0	17.8246	20.6897	5	6	5	1	348	38.174	5.31	8.9756	5
FALSE	High	Master Protein	A0A0C7DQ39	Uncharacterized protein OS=Mycobacterium bovis GN=MBO1_00466 PE=4 SV=1	0	17.8111	21.2121	5	6	5	1	165	17.72	9.04	11.7546	5
FALSE	High	Master Protein	Q79CV0	Alkyl hydroperoxide reductase OS=Mycobacterium bovis GN=ahpC PE=4 SV=1	0	17.7437	27.6923	3	4	3	1	195	21.553	4.7	13.8973	3
FALSE	High	Master Protein	Q7TWB7	Long-chain-fatty-acid--CoA/3-oxocholest-4-en-26-oate--CoA ligase OS=Mycobacterium bovis (strain ATCC BAA-935 / AF2122/97) GN=fadD19 PE=3 SV=1	0	17.7227	27.7372	7	7	7	1	548	59.703	5.67	3.45316	7
FALSE	High	Master Protein	A0A0H3MFH1	Uncharacterized protein OS=Mycobacterium bovis (strain BCG / Pasteur 1173P2) GN=BCG_2427c PE=4 SV=1	0	17.5932	14.1561	5	5	5	1	551	61.345	5.81	12.972	5
FALSE	High	Master Protein	C1ANT1	Argininosuccinate synthase OS=Mycobacterium bovis (strain BCG / Tokyo 172 / ATCC 35737 / TMC 1019) GN=argG PE=3 SV=1	0	17.5788	25.1256	5	5	5	1	398	43.655	5.43	11.8503	5
FALSE	High	Master Protein	A0A0H3MBU2	Cell division protein FtsZ OS=Mycobacterium bovis (strain BCG / Pasteur 1173P2) GN=ftsZ PE=3 SV=1	0	17.5718	19.2612	5	5	5	1	379	38.732	4.72	11.6658	5
FALSE	High	Master Protein	A0A0H3M4K0	PPE family protein OS=Mycobacterium bovis (strain BCG / Pasteur 1173P2) GN=PPE22 PE=4 SV=1	0	17.3951	35.5844	5	7	5	1	385	38.361	5.1	8.41421	5
FALSE	High	Master Protein	C1AQ71	UDP-N-acetylmuramoylalanine--D-glutamate ligase OS=Mycobacterium bovis (strain BCG / Tokyo 172 / ATCC 35737 / TMC 1019) GN=murD PE=3 SV=2	0	17.301	18.1452	6	7	6	1	496	50.223	5.48	9.49467	6
FALSE	High	Master Protein	A0A0H3M4T3	Possible oxidoreductase OS=Mycobacterium bovis (strain BCG / Pasteur 1173P2) GN=BCG_0994c PE=4 SV=1	0	17.2974	31.9444	6	6	6	1	288	31.768	5.99	10.3769	6
FALSE	High	Master Protein	A0A0K2I296	Lyase OS=Mycobacterium bovis BCG GN=RN06_4492 PE=4 SV=1	0	17.2588	30.163	5	8	5	1	368	39.932	6.54	7.71224	5
FALSE	High	Master Protein	A0A0C7DDF6	ESX-1 secretion-associated protein EspA OS=Mycobacterium bovis GN=MBO1_00797 PE=4 SV=1	0	17.2314	6.88776	2	3	2	1	392	39.876	5.36	9.54787	2
FALSE	High	Master Protein	A0A0K2HQZ5	Diacylglycerol acyltransferase/mycolyltransferase Ag85C OS=Mycobacterium bovis BCG GN=RN06_0163 PE=4 SV=1	0	17.1627	19.4118	4	5	4	1	340	36.748	6.34	12.1209	4
FALSE	High	Master Protein	P65168	Inosine-5'-monophosphate dehydrogenase OS=Mycobacterium bovis (strain ATCC BAA-935 / AF2122/97) GN=guaB PE=3 SV=1	0	17.0298	31.758	7	7	7	1	529	54.832	6.39	11.6784	7
FALSE	High	Master Protein	A0A0H4XS87	Citrate lyase subunit beta OS=Mycobacterium bovis GN=BOVR_12965 PE=3 SV=1	0	17.0004	21.978	5	5	5	1	273	28.868	5.41	10.1227	5
FALSE	High	Master Protein	A0A0H3M6Y1	Probable dehydrogenase OS=Mycobacterium bovis (strain BCG / Pasteur 1173P2) GN=BCG_1846c PE=4 SV=1	0	16.9951	27.5	7	8	7	1	400	41.914	7.2	16.0621	7
FALSE	High	Master Protein	A0A109S7X8	Oxidoreductase FadB OS=Mycobacterium bovis BCG GN=RN06_2368 PE=4 SV=1	0	16.9626	23.2346	6	6	6	1	439	47.05	8.25	9.84568	6
FALSE	High	Master Protein	A0A0H4XR45	Amidohydrolase OS=Mycobacterium bovis GN=BOVR_02175 PE=4 SV=1	0	16.7494	16.6	5	6	5	1	500	52.01	5.19	11.5872	5
FALSE	High	Master Protein	A0A0H3MDX6	Probable conserved membrane protein OS=Mycobacterium bovis (strain BCG / Pasteur 1173P2) GN=BCG_1816 PE=4 SV=1	0	16.7277	7.69231	6	7	6	1	1391	152.703	5.45	13.4028	6
FALSE	High	Master Protein	A0A0C7DBA8	Secreted fibronectin-binding protein antigen prot ein fbpD OS=Mycobacterium bovis GN=MBO1_00655 PE=4 SV=1	0	16.5971	28.7097	4	7	4	1	310	32.182	6.68	15.5252	4
FALSE	High	Master Protein	A0A0H3M443	Probable 6-phosphogluconate dehydrogenase, decarboxylating gnd2 OS=Mycobacterium bovis (strain BCG / Pasteur 1173P2) GN=gnd2 PE=4 SV=1	0	16.5767	22.3529	5	5	5	1	340	36.335	5.44	10.4959	5
FALSE	High	Master Protein	A0A0Y1D3P5	Glycine--tRNA ligase OS=Mycobacterium bovis BCG GN=glyQS PE=3 SV=1	0	16.5549	24.7934	6	6	6	1	484	55.054	6.4	15.7029	6
FALSE	High	Master Protein	D6MJP6	Diacylglycerol acyltransferase/mycolyltransferase Ag85A OS=Mycobacterium bovis GN=fbpB PE=4 SV=1	0	16.5314	20.3077	4	4	4	1	325	34.525	5.94	6.61124	4
FALSE	High	Master Protein	A1KHD9	Arginine deiminase OS=Mycobacterium bovis (strain BCG / Pasteur 1173P2) GN=arcA PE=3 SV=1	0	16.5154	22.8856	5	5	5	1	402	43.062	5.38	8.95938	5
FALSE	High	Master Protein	A0A0K2HTS4	50S ribosomal protein L25 OS=Mycobacterium bovis BCG GN=rplY PE=3 SV=1	0	16.4878	45.1163	5	9	5	1	215	22.428	4.88	12.1046	5
FALSE	High	Master Protein	A0A0C7DDB2	Uncharacterized protein OS=Mycobacterium bovis GN=MBO1_01595 PE=4 SV=1	0	16.3868	18.8742	4	7	4	1	302	31.783	7.52	11.0772	4
FALSE	High	Master Protein	Q7TVK7	Probable long-chain-fatty-acid--CoA ligase FadD23 OS=Mycobacterium bovis (strain ATCC BAA-935 / AF2122/97) GN=fadD23 PE=3 SV=1	0	16.3192	12.8425	4	4	2	1	584	62.801	5.67	8.93769	4
FALSE	High	Master Protein	P66985	Tryptophan synthase beta chain OS=Mycobacterium bovis (strain ATCC BAA-935 / AF2122/97) GN=trpB PE=3 SV=1	0	16.2736	17.0616	5	5	5	1	422	44.617	5.66	8.09408	5
FALSE	High	Master Protein	A0A0K2HU64	Enoyl-CoA hydratase EchA8 OS=Mycobacterium bovis BCG GN=RN06_1341 PE=3 SV=1	0	16.1885	33.8521	4	7	4	1	257	27.256	5.05	16.3868	4
FALSE	High	Master Protein	A0A0H3M168	Possible hydrolase OS=Mycobacterium bovis (strain BCG / Pasteur 1173P2) GN=BCG_0076c PE=4 SV=1	0	16.1462	44.2953	7	7	7	1	298	32.111	5.48	14.199	7
FALSE	High	Master Protein	A0A083VVT9	GTPase EngC OS=Mycobacterium bovis GN=BOVR_16745 PE=3 SV=1	0	16.1378	37.2727	6	6	6	1	330	34.854	7.8	10.2393	6
FALSE	High	Master Protein	Q7U0X4	Response regulator MprA OS=Mycobacterium bovis (strain ATCC BAA-935 / AF2122/97) GN=mprA PE=1 SV=1	0	16.0992	24.3478	4	4	4	1	230	25.908	5.44	8.60984	4
FALSE	High	Master Protein	A0A0C7DQP2	2,3-bisphosphoglycerate-dependent phosphoglycerate mutase OS=Mycobacterium bovis GN=gpmA PE=3 SV=1	0	16.0985	32.0144	5	5	5	1	278	30.483	7.14	11.7886	5
FALSE	High	Master Protein	A0A0M3TQ22	Hydrolase OS=Mycobacterium bovis GN=BOVR_19665 PE=4 SV=1	0	15.9199	27.4699	6	6	6	1	415	45.245	8.46	12.4124	6
FALSE	High	Master Protein	A0A0H3M7L7	Probable polyketide synthase pks12 OS=Mycobacterium bovis (strain BCG / Pasteur 1173P2) GN=pks12 PE=4 SV=1	0	15.8592	4.6013	7	8	6	1	4151	431.273	5.22	11.0224	7
FALSE	High	Master Protein	A0A0H3MFC9	Uncharacterized protein OS=Mycobacterium bovis (strain BCG / Pasteur 1173P2) GN=BCG_3736c PE=4 SV=1	0	15.7421	63.5762	4	5	4	1	151	15.236	5.2	9.82938	4
FALSE	High	Master Protein	A0A0C7DFD7	Uncharacterized ABC transporter ATP-binding prote in Rv1281c/MT1318 OS=Mycobacterium bovis GN=MBO1_02392 PE=3 SV=1	0	15.7414	18.4641	5	5	5	1	612	65.283	6.44	9.21673	5
FALSE	High	Master Protein	A0A0H4YCC1	Soluble pyridine nucleotide transhydrogenase OS=Mycobacterium bovis GN=sthA PE=3 SV=1	0	15.7327	25.2654	7	9	7	1	471	50.997	6	10.7941	7
FALSE	High	Master Protein	A0A0H3MC83	Conserved hypothetical alanine and glycine rich protein OS=Mycobacterium bovis (strain BCG / Pasteur 1173P2) GN=BCG_3936c PE=4 SV=1	0	15.6548	19.7826	4	7	4	1	460	47.69	4.94	8.32975	4
FALSE	High	Master Protein	Q7U0A6	Multifunctional 2-oxoglutarate metabolism enzyme OS=Mycobacterium bovis (strain ATCC BAA-935 / AF2122/97) GN=kgd PE=3 SV=2	0	15.6081	7.79854	5	5	5	1	1231	135.792	6.29	5.3791	5
FALSE	High	Master Protein	A0A0H3M783	Uncharacterized protein OS=Mycobacterium bovis (strain BCG / Pasteur 1173P2) GN=BCG_2469c PE=4 SV=1	0	15.5824	13.6038	4	5	3	1	419	44.298	8.69	9.7111	4
FALSE	High	Master Protein	A0A0H3M3F9	Uncharacterized protein OS=Mycobacterium bovis (strain BCG / Pasteur 1173P2) GN=BCG_1292c PE=4 SV=1	0	15.575	19.3103	4	5	4	1	435	47.299	5.44	14.7237	4
FALSE	High	Master Protein	A0A0H3MAU5	UPF0336 protein BCG_0684 OS=Mycobacterium bovis (strain BCG / Pasteur 1173P2) GN=BCG_0684 PE=3 SV=1	0	15.5721	43.038	4	5	4	1	158	17.47	4.63	10.7177	4
FALSE	High	Master Protein	A0A0H3MDQ6	Pyruvate carboxylase OS=Mycobacterium bovis (strain BCG / Pasteur 1173P2) GN=pca PE=4 SV=1	0	15.5582	11.4463	6	8	6	1	1127	120.349	5.5	8.80316	6
FALSE	High	Master Protein	A0A0Y1BII3	Lysophospholipase OS=Mycobacterium bovis BCG GN=RN06_0230 PE=4 SV=1	0	15.5305	28.1879	6	8	6	1	298	32.211	6.38	10.026	6
FALSE	High	Master Protein	A0A0Y1CX01	Multifunctional RNASE H/alpha-ribazole phosphatase/acid phosphatase OS=Mycobacterium bovis BCG GN=RN06_2738 PE=4 SV=1	0	15.529	19.5724	7	7	7	1	608	66.109	7.85	10.3174	7
FALSE	High	Master Protein	A0A0C7DC15	Succinate-semialdehyde dehydrogenase OS=Mycobacterium bovis GN=BOVR_01235 PE=3 SV=1	0	15.5274	27.5711	6	7	6	1	457	48.514	5.1	9.00557	6
FALSE	High	Master Protein	A0A0H3M1W4	Uncharacterized protein OS=Mycobacterium bovis (strain BCG / Pasteur 1173P2) GN=esxG PE=4 SV=1	0	15.4343	65.9794	2	5	2	1	97	9.772	6.51	12.6177	2
FALSE	High	Master Protein	A0A083WA03	Alpha-1,4 glucan phosphorylase OS=Mycobacterium bovis GN=BOVR_07065 PE=3 SV=1	0	15.42	10.8922	5	5	5	1	863	95.462	5.44	10.7502	5
FALSE	High	Master Protein	A0A083WK19	Anthranilate synthase OS=Mycobacterium bovis GN=BOVR_00080 PE=4 SV=1	0	15.3831	32.7586	3	5	3	1	232	24.63	6.51	8.25201	3
FALSE	High	Master Protein	P59955	Transaldolase OS=Mycobacterium bovis (strain ATCC BAA-935 / AF2122/97) GN=tal PE=3 SV=1	0	15.3442	21.1796	5	5	5	1	373	40.666	5.05	10.0642	5
FALSE	High	Master Protein	A0A0K2HQT6	30S ribosomal protein S6 OS=Mycobacterium bovis BCG GN=rpsF PE=3 SV=1	0	15.2662	43.75	4	4	4	1	96	10.928	8.44	9.1344	4
FALSE	High	Master Protein	A0A083WMT4	Serine/threonine-protein kinase PknA OS=Mycobacterium bovis GN=MBO_300560 PE=4 SV=1	0	15.2567	14.1531	5	5	5	1	431	45.569	10.64	13.6133	5
FALSE	High	Master Protein	A0A0H3P647	POSSIBLE COENZYME F420-DEPENDENT OXIDOREDUCTASE OS=Mycobacterium bovis (strain ATCC BAA-935 / AF2122/97) GN=Mb3550c PE=4 SV=1	0	15.2065	23.9193	4	5	4	1	347	37.593	5.44	7.13365	4
FALSE	High	Master Protein	A0A0K2HSS3	Ferredoxin reductase OS=Mycobacterium bovis BCG GN=RN06_0851 PE=4 SV=1	0	15.1883	16.9951	4	6	4	1	406	42.991	5.06	13.7801	4
FALSE	High	Master Protein	A0A083VR36	Aminotransferase OS=Mycobacterium bovis GN=BOVR_19690 PE=4 SV=1	0	15.1797	24.8744	6	6	6	1	398	41.826	6.24	11.5041	6
FALSE	High	Master Protein	A0A083VXR1	Acyl-CoA dehydrogenase OS=Mycobacterium bovis GN=BOVR_16255 PE=3 SV=1	0	15.1598	15.212	3	4	3	1	401	43.317	5.35	7.97345	3
FALSE	High	Master Protein	A0A0K2HTH2	Uncharacterized protein OS=Mycobacterium bovis BCG GN=RN06_1153 PE=4 SV=1	0	15.0854	29.8883	5	6	5	1	358	37.727	4.78	14.9599	5
FALSE	High	Master Protein	A0A0C7DGK7	Bifunctional protein FolD OS=Mycobacterium bovis GN=folD PE=3 SV=1	0	15.0684	39.3443	5	6	5	1	305	32.037	6.86	12.4423	5
FALSE	High	Master Protein	A0A0C7DHJ3	Methyltransferase domain protein OS=Mycobacterium bovis GN=MBO1_03189 PE=4 SV=1	0	15.0232	39.8374	5	5	5	1	246	26.881	6.8	12.8644	5
FALSE	High	Master Protein	P64200	Aspartyl/glutamyl-tRNA(Asn/Gln) amidotransferase subunit B OS=Mycobacterium bovis (strain ATCC BAA-935 / AF2122/97) GN=gatB PE=3 SV=1	0	14.9955	25.3438	6	6	6	1	509	54.599	5.2	7.07136	6
FALSE	High	Master Protein	A0A0C7DMD8	Electron transfer flavoprotein subunit beta OS=Mycobacterium bovis GN=MBO1_02560 PE=4 SV=1	0	14.9408	46.5035	5	5	5	1	286	30.119	4.84	7.41936	5
FALSE	High	Master Protein	A0A0H3MC04	Possible conserved membrane protein OS=Mycobacterium bovis (strain BCG / Pasteur 1173P2) GN=BCG_2219 PE=4 SV=1	0	14.9364	17.3913	3	3	3	1	230	24.356	8.41	9.04713	3
FALSE	High	Master Protein	A0A0H3MHD1	Possible transmembrane cation transporter OS=Mycobacterium bovis (strain BCG / Pasteur 1173P2) GN=BCG_3225c PE=4 SV=1	0	14.8446	14.0845	4	5	4	1	355	38.11	7.56	5.75338	4
FALSE	High	Master Protein	A1KJE8	Putative succinate-semialdehyde dehydrogenase [NADP(+)] 2 OS=Mycobacterium bovis (strain BCG / Pasteur 1173P2) GN=gabD2 PE=3 SV=1	0	14.8236	20.2703	4	5	4	1	518	55.29	7.85	10.3649	4
FALSE	High	Master Protein	A0A083WLW8	ESX-3 secretion system protein eccB3 (ESX conserv ed component B3) (Type VII secretion system protein eccB3) (T7SS protein eccB3) OS=Mycobacterium bovis GN=BOVR_01495 PE=4 SV=1	0	14.8152	17.8439	5	7	5	1	538	55.908	7.28	10.6222	5
FALSE	High	Master Protein	A0A0H3M4P0	Uncharacterized protein OS=Mycobacterium bovis (strain BCG / Pasteur 1173P2) GN=BCG_1803c PE=3 SV=1	0	14.7956	26.7176	5	9	5	1	262	28.736	6.86	9.12788	5
FALSE	High	Master Protein	A0A0M3TNT1	Acetyl-CoA acetyltransferase OS=Mycobacterium bovis GN=BOVR_07040 PE=4 SV=1	0	14.7951	16.0305	3	4	3	1	393	40.444	5.08	10.9777	3
FALSE	High	Master Protein	A0A0H3P5Z7	Probable penicillin-binding protein dacb1 (D-alanyl-d-alanine carboxypeptidase) (Dd-peptidase) (Dd-carboxypeptidase) (Pbp) (Dd-transpeptidase) (Serine-type d-ala-d-ala carboxypeptidase) (D-amino acid... OS=Mycobacterium bovis (strain ATCC BAA-935 / AF2122/97) GN=dacB1 PE=3 SV=1	0	14.6812	21.7284	4	6	4	1	405	41.656	6.28	10.9172	4
FALSE	High	Master Protein	A0A0H3MG56	Uncharacterized protein OS=Mycobacterium bovis (strain BCG / Pasteur 1173P2) GN=BCG_2712c PE=4 SV=1	0	14.676	53	2	3	2	1	100	10.909	4.37	9.52854	2
FALSE	High	Master Protein	Q7U2D4	Putative S-adenosyl-L-methionine-dependent methyltransferase Mb0289 OS=Mycobacterium bovis (strain ATCC BAA-935 / AF2122/97) GN=Mb0289 PE=3 SV=1	0	14.6656	31.1258	5	6	5	1	302	32.978	5.01	10.6455	5
FALSE	High	Master Protein	A0A083VTZ3	30S ribosomal protein S13 OS=Mycobacterium bovis GN=rpsM PE=3 SV=1	0	14.6091	38.7097	6	6	6	1	124	14.342	11.02	8.38583	6
FALSE	High	Master Protein	A0A0M5LB60	Aldehyde dehydrogenase OS=Mycobacterium bovis GN=BOVR_17065 PE=4 SV=1	0	14.501	19.2843	5	7	5	1	503	52.314	5.4	12.9096	5
FALSE	High	Master Protein	A0A0C7DC36	Uncharacterized protein OS=Mycobacterium bovis GN=MBO1_01075 PE=4 SV=1	0	14.4962	29.8137	4	4	4	1	161	17.686	10.48	12.5287	4
FALSE	High	Master Protein	A0A0C7DER4	LexA repressor OS=Mycobacterium bovis GN=lexA PE=3 SV=1	0	14.3201	35.8871	4	6	4	1	248	26.002	5.11	12.8502	4
FALSE	High	Master Protein	A0A083WMY4	Isocitrate dehydrogenase OS=Mycobacterium bovis GN=BOVR_00360 PE=4 SV=1	0	14.3134	19.0604	6	7	6	1	745	82.484	5.38	12.6541	6
FALSE	High	Master Protein	A0A0H3M1A0	Uncharacterized protein OS=Mycobacterium bovis (strain BCG / Pasteur 1173P2) GN=BCG_0371 PE=4 SV=1	0	14.2926	16.4751	3	5	3	1	261	28.531	6.11	12.9932	3
FALSE	High	Master Protein	A0A0H3P1M1	Esx conserved component ecca3. esx-3 type vii secretion system protein OS=Mycobacterium bovis (strain ATCC BAA-935 / AF2122/97) GN=ecca3 PE=4 SV=1	0	14.2547	15.3724	5	6	5	1	631	68.007	5.29	8.75973	5
FALSE	High	Master Protein	A1KLT2	Adenine phosphoribosyltransferase OS=Mycobacterium bovis (strain BCG / Pasteur 1173P2) GN=apt PE=3 SV=1	0	14.2253	27.3543	3	3	3	1	223	23.232	9.47	9.70397	3
FALSE	High	Master Protein	A0A109S8N0	2-oxoglutarate oxidoreductase subunit KorB OS=Mycobacterium bovis BCG GN=RN06_2997 PE=4 SV=1	0	14.2001	23.2558	5	6	5	1	430	46.088	6.4	10.6999	5
FALSE	High	Master Protein	A0A0H4XWW6	Uncharacterized protein OS=Mycobacterium bovis GN=BOVR_12480 PE=4 SV=1	0	14.1604	21.147	4	4	4	1	279	31.01	6.86	7.84754	4
FALSE	High	Master Protein	A0A083VX16	Uncharacterized protein OS=Mycobacterium bovis GN=BOVR_14975 PE=4 SV=1	0	14.1548	31.8021	4	4	4	1	283	30.584	5.73	9.68433	4
FALSE	High	Master Protein	A0A083W2S8	Branched-chain alpha-keto acid dehydrogenase subunit E2 OS=Mycobacterium bovis GN=BOVR_12950 PE=3 SV=1	0	14.1397	14.7583	4	7	4	1	393	41.036	5.3	11.1957	4
FALSE	High	Master Protein	A0A0H3M4N2	Uncharacterized protein OS=Mycobacterium bovis (strain BCG / Pasteur 1173P2) GN=BCG_1793c PE=4 SV=1	0	14.0577	12.9663	5	6	5	1	563	60.543	9.54	12.8765	5
FALSE	High	Master Protein	A0A083WMX6	Uncharacterized protein OS=Mycobacterium bovis GN=BOVR_00315 PE=4 SV=1	0	14.0256	23.4783	4	6	4	1	230	25.564	8.09	10.9487	4
FALSE	High	Master Protein	A0A109S8M8	Ribonuclease E OS=Mycobacterium bovis BCG GN=RN06_2989 PE=4 SV=1	0	14.0171	8.07975	4	4	4	1	953	103.329	4.77	10.6331	4
FALSE	High	Master Protein	A0A0H4YDS9	GDP-mannose pyrophosphorylase OS=Mycobacterium bovis GN=BOVR_16920 PE=4 SV=1	0	13.9978	33.1476	6	6	6	1	359	37.834	5.21	4.39793	6
FALSE	High	Master Protein	A0A0K2HYK2	Alanine--tRNA ligase OS=Mycobacterium bovis BCG GN=alaS PE=3 SV=1	0	13.9921	13.1637	5	5	5	1	904	97.283	5.55	6.07255	5
FALSE	High	Master Protein	A0A0C7DGQ1	Uncharacterized glycosyl hydrolase Rv3401/MT3509 OS=Mycobacterium bovis GN=MBO1_02853 PE=4 SV=1	0	13.9892	16.9211	7	7	7	1	786	87.261	5.81	9.13393	7
FALSE	High	Master Protein	A0A0C7DK57	Translation initiation factor IF-3 OS=Mycobacterium bovis GN=infC PE=3 SV=1	0	13.9625	34.2342	4	4	4	1	222	24.235	9.76	10.7203	4
FALSE	High	Master Protein	A0A083WCJ4	Oxidoreductase OS=Mycobacterium bovis GN=BOVR_07680 PE=4 SV=1	0	13.9487	28.7129	5	5	5	1	303	32.638	5.26	4.61466	5
FALSE	High	Master Protein	P0A551	DNA polymerase I OS=Mycobacterium bovis (strain ATCC BAA-935 / AF2122/97) GN=polA PE=3 SV=1	0	13.9099	4.5354	3	3	3	1	904	98.412	5.19	8.36076	3
FALSE	High	Master Protein	A0A0H3MBA2	Possible acyl-CoA thiolase fadA OS=Mycobacterium bovis (strain BCG / Pasteur 1173P2) GN=fadA PE=3 SV=1	0	13.8995	25.8065	5	5	5	1	403	42.358	5.4	4.67707	5
FALSE	High	Master Protein	A0A0C7DRX1	ATP phosphoribosyltransferase OS=Mycobacterium bovis GN=hisG PE=3 SV=1	0	13.8731	22.7273	4	5	4	1	286	30.68	5.12	10.2036	4
FALSE	High	Master Protein	G7QRR6	Universal stress protein family OS=Mycobacterium bovis BCG str. Mexico PE=3 SV=1	0	13.8123	16.835	4	4	4	1	297	31.632	5.76	10.7328	4
FALSE	High	Master Protein	A0A0C7DH90	Acyl-[acyl-carrier protein] desaturase (EC 1.14.1 9.2) OS=Mycobacterium bovis GN=MBO1_02319 PE=4 SV=1	0	13.8044	24.3816	3	4	3	1	283	32.361	5.01	5.52467	3
FALSE	High	Master Protein	A0A0H3MHM7	Uncharacterized protein OS=Mycobacterium bovis (strain BCG / Pasteur 1173P2) GN=BCG_3376 PE=4 SV=1	0	13.7735	12.1429	4	5	4	1	420	45.704	4.3	10.0334	4
FALSE	High	Master Protein	A0A109S7F2	Uncharacterized protein OS=Mycobacterium bovis BCG GN=RN06_1906 PE=4 SV=1	0	13.7593	20.979	2	3	2	1	143	15.315	6.8	9.56277	2
FALSE	High	Master Protein	A0A0H3P3F9	Conserved protein OS=Mycobacterium bovis (strain ATCC BAA-935 / AF2122/97) GN=Mb1525 PE=4 SV=1	0	13.7563	52.5424	3	4	3	1	118	12.298	10.14	9.95109	3
FALSE	High	Master Protein	A0A0H3M9Y6	Putative transcription factor OS=Mycobacterium bovis (strain BCG / Pasteur 1173P2) GN=BCG_3648c PE=4 SV=1	0	13.697	20.3704	2	4	2	1	162	17.896	5.67	8.69742	2
FALSE	High	Master Protein	A0A0H3P508	PROBABLE FEIII-DICITRATE-BINDING PERIPLASMIC LIPOPROTEIN FECB OS=Mycobacterium bovis (strain ATCC BAA-935 / AF2122/97) GN=fecB PE=4 SV=1	0	13.6951	17.2702	3	4	3	1	359	36.888	5.48	12.0772	3
FALSE	High	Master Protein	A0A0H3MBF0	Two component response transcriptional regulatory protein prrA OS=Mycobacterium bovis (strain BCG / Pasteur 1173P2) GN=prrA PE=4 SV=1	0	13.6625	19.9153	3	4	3	1	236	25.238	5.16	7.08841	3
FALSE	High	Master Protein	A0A0K2HZG5	Membrane protein OS=Mycobacterium bovis BCG GN=RN06_3120 PE=4 SV=1	0	13.6574	22.542	5	5	5	1	417	45.446	9.7	10.3744	5
FALSE	High	Master Protein	A1KI95	ATP synthase subunit b-delta OS=Mycobacterium bovis (strain BCG / Pasteur 1173P2) GN=atpFH PE=3 SV=1	0	13.642	15.4709	4	4	4	1	446	48.776	5.58	9.00689	4
FALSE	High	Master Protein	A0A0H3P5U3	Nad(P)h quinone reductase lpda OS=Mycobacterium bovis (strain ATCC BAA-935 / AF2122/97) GN=lpdA PE=4 SV=1	0	13.6194	24.8408	5	6	5	1	471	49.133	6.42	9.56422	5
FALSE	High	Master Protein	A0A0H3P6G5	Conserved protein OS=Mycobacterium bovis (strain ATCC BAA-935 / AF2122/97) GN=Mb3746 PE=4 SV=1	0	13.5184	10.6383	3	4	3	1	470	52.944	7.49	6.43251	3
FALSE	High	Master Protein	A0A0K2I025	Ketol-acid reductoisomerase OS=Mycobacterium bovis BCG GN=ilvC PE=3 SV=1	0	13.4956	22.8487	6	7	6	1	337	36.512	5.12	4.03656	6
FALSE	High	Master Protein	A0A083VXB2	Glutamate--tRNA ligase OS=Mycobacterium bovis GN=gltX PE=3 SV=1	0	13.3901	15.5102	5	5	5	1	490	53.831	5.8	9.73486	5
FALSE	High	Master Protein	A0A083VWH2	Hydrolase, Ama/HipO/HyuC family (Possible N-acyl-L-amino acid amidohydrolase AmiA1 (N-acyl-L-amino acid amin ohydrolase)) OS=Mycobacterium bovis GN=BOVR_17125 PE=4 SV=1	0	13.3482	25.7069	5	5	5	1	389	41.201	5.92	7.60444	5
FALSE	High	Master Protein	A0A0H3M3Q6	Putative short-chain type oxidoreductase OS=Mycobacterium bovis (strain BCG / Pasteur 1173P2) GN=BCG_0525c PE=3 SV=1	0	13.2474	30.2789	3	3	3	1	251	26.4	8.54	7.92539	3
FALSE	High	Master Protein	P0A5A8	Protoporphyrinogen oxidase OS=Mycobacterium bovis (strain ATCC BAA-935 / AF2122/97) GN=hemY PE=3 SV=1	0	13.2245	18.8053	4	5	4	1	452	46.818	6.46	8.18207	4
FALSE	High	Master Protein	A0A0C7DHY3	Conserved protein OS=Mycobacterium bovis GN=MBO1_02631 PE=4 SV=1	0	13.2016	32.5088	5	6	5	1	283	30.505	5.39	9.88604	5
FALSE	High	Master Protein	A0A0H3P1I3	PROBABLE CONSERVED MCE ASSOCIATED PROTEIN OS=Mycobacterium bovis (strain ATCC BAA-935 / AF2122/97) GN=Mb0183 PE=4 SV=1	0	13.1	31.5217	4	6	4	1	184	20.151	8.22	4.36909	4
FALSE	High	Master Protein	A0A0H3M9W0	Probable sugar-transport ATP-binding protein ABC transporter sugC OS=Mycobacterium bovis (strain BCG / Pasteur 1173P2) GN=sugC PE=3 SV=1	0	13.0889	8.39695	2	3	2	1	393	42.888	6.11	8.55986	2
FALSE	High	Master Protein	A0A0C7DHK3	Histone-like protein hns OS=Mycobacterium bovis GN=MBO1_03200 PE=4 SV=1	0	13.0769	17.0213	2	2	2	1	141	14.624	10.74	7.53445	2
FALSE	High	Master Protein	A0A083VZX8	Conserved alanine and leucine rich protein (Rv271 4-like protein) (Uncharacterized protein) OS=Mycobacterium bovis GN=BOVR_14030 PE=4 SV=1	0	13.0677	22.8395	4	4	4	1	324	35.569	4.82	9.49735	4
FALSE	High	Master Protein	A0A083VRF9	ATPase OS=Mycobacterium bovis GN=BOVR_19145 PE=4 SV=1	0	13.0532	21.4706	5	5	5	1	340	35.834	5.43	8.59341	5
FALSE	High	Master Protein	A0A083WC22	ABC transporter ATP-binding protein OS=Mycobacterium bovis GN=BOVR_06480 PE=4 SV=1	0	13.0363	28.6174	5	7	5	1	311	33.456	6.39	8.2559	5
FALSE	High	Master Protein	A0A0K2HX10	Uncharacterized protein OS=Mycobacterium bovis BCG GN=RN06_2529 PE=4 SV=1	0	13.0278	50.7463	5	6	5	1	134	14.805	9.66	10.9925	5
FALSE	High	Master Protein	A0A083WF73	Phosphoribosylglycinamide formyltransferase OS=Mycobacterium bovis GN=purN PE=3 SV=1	0	13.0097	53.0233	4	5	4	1	215	22.402	6.64	8.98945	4
FALSE	High	Master Protein	A0A0H3M5J5	Iron-sulfur cluster carrier protein OS=Mycobacterium bovis (strain BCG / Pasteur 1173P2) GN=mrp PE=3 SV=1	0	12.9656	19.7436	4	4	4	1	390	41.038	6.67	8.92392	4
FALSE	High	Master Protein	A0A083VU83	Conserved protein (Diacylglycerol kinase catalyti c domain-containing protein) OS=Mycobacterium bovis GN=BOVR_16680 PE=4 SV=1	0	12.8962	24.9221	6	6	6	1	321	34.453	9.04	12.3662	6
FALSE	High	Master Protein	A0A0C7DAP9	Methoxy mycolic acid synthase 2 OS=Mycobacterium bovis GN=MBO1_00474 PE=4 SV=1	0	12.8541	26.4984	5	5	5	1	317	35.685	6.19	4.93311	5
FALSE	High	Master Protein	C1AL67	Adenylate kinase OS=Mycobacterium bovis (strain BCG / Tokyo 172 / ATCC 35737 / TMC 1019) GN=adk PE=3 SV=1	0	12.8388	41.989	4	5	4	1	181	20.113	5.15	12.828	4
FALSE	High	Master Protein	A0A0Y1B187	Phosphoserine/threonine phosphatase PstP OS=Mycobacterium bovis BCG GN=RN06_0022 PE=4 SV=1	0	12.8098	25.7827	6	6	6	1	543	57.456	6.65	5.19657	6
FALSE	High	Master Protein	A0A083VWV9	Ribosome-binding factor A OS=Mycobacterium bovis GN=rbfA PE=3 SV=1	0	12.7962	49.7268	4	5	4	1	183	18.987	5.67	9.19456	4
FALSE	High	Master Protein	A0A0H3M950	Phosphate-binding protein PstS1 OS=Mycobacterium bovis (strain BCG / Pasteur 1173P2) GN=pstS1 PE=1 SV=1	0	12.7541	22.7273	4	4	4	1	374	38.191	5.38	8.68721	4
FALSE	High	Master Protein	A0A109SA50	Sulfurtransferase OS=Mycobacterium bovis BCG GN=RN06_3970 PE=4 SV=1	0	12.7439	23.053	5	5	5	1	321	35.746	5.29	8.43699	5
FALSE	High	Master Protein	A0A0H3M4E5	Probable protease II ptrB (Oligopeptidase B) OS=Mycobacterium bovis (strain BCG / Pasteur 1173P2) GN=ptrB PE=4 SV=1	0	12.7436	12.7955	5	5	5	1	719	80.332	5.16	7.07474	5
FALSE	High	Master Protein	P0A509	Acetyl-/propionyl-coenzyme A carboxylase alpha chain OS=Mycobacterium bovis (strain ATCC BAA-935 / AF2122/97) GN=accA1 PE=3 SV=1	0	12.727	19.2661	5	5	5	1	654	70.549	5.59	7.79324	5
FALSE	High	Master Protein	A0A0C7DP76	ABC transporter, ATP-binding protein (Probable co nserved ATP-binding protein ABC transporter) OS=Mycobacterium bovis GN=BOVR_15745 PE=4 SV=1	0	12.6954	33.4495	5	6	5	1	287	31.23	5.86	7.3119	5
FALSE	High	Master Protein	A0A0K2HSV7	Mycofactocin system heme/flavin oxidoreductase MftD OS=Mycobacterium bovis BCG GN=RN06_0858 PE=4 SV=1	0	12.6871	21.4646	3	4	3	1	396	42.135	8.85	11.949	3
FALSE	High	Master Protein	A0A0H3MCT9	Probable bacterioferritin comigratory protein bcp OS=Mycobacterium bovis (strain BCG / Pasteur 1173P2) GN=bcp PE=4 SV=1	0	12.6813	40.7643	3	4	3	1	157	17.067	8.41	10.9481	3
FALSE	High	Master Protein	A0A0H3MC09	Putative oxidoreductase OS=Mycobacterium bovis (strain BCG / Pasteur 1173P2) GN=BCG_3852 PE=4 SV=1	0	12.6646	20.3905	5	5	5	1	461	50.132	7.65	8.72957	5
FALSE	High	Master Protein	C1AHR7	30S ribosomal protein S11 OS=Mycobacterium bovis (strain BCG / Tokyo 172 / ATCC 35737 / TMC 1019) GN=rpsK PE=3 SV=1	0	12.6583	20.8633	3	4	3	1	139	14.762	11.68	9.2768	3
FALSE	High	Master Protein	A0A0K2HUG7	Phosphate-binding protein PstS OS=Mycobacterium bovis BCG GN=RN06_1155 PE=3 SV=1	0	12.579	14.0541	4	5	4	1	370	37.93	6.07	11.1329	4
FALSE	High	Master Protein	A0A0H3P1T3	MYCOLIC ACID SYNTHASE PCAA (CYCLOPROPANE SYNTHASE) OS=Mycobacterium bovis (strain ATCC BAA-935 / AF2122/97) GN=pcaA PE=4 SV=1	0	12.5411	16.7247	3	5	3	1	287	33.007	6.47	7.14352	3
FALSE	High	Master Protein	A1KJ71	Acetylglutamate kinase OS=Mycobacterium bovis (strain BCG / Pasteur 1173P2) GN=argB PE=3 SV=1	0	12.5368	23.8095	4	4	4	1	294	30.917	5.78	6.86091	4
FALSE	High	Master Protein	A0A0C7DIU5	50S ribosomal protein L13 OS=Mycobacterium bovis GN=rplM PE=3 SV=1	0	12.531	22.5641	3	3	3	1	195	21.593	10.33	9.01371	3
FALSE	High	Master Protein	A0A0H3MDL1	Probable transcriptional regulatory protein OS=Mycobacterium bovis (strain BCG / Pasteur 1173P2) GN=BCG_2908 PE=4 SV=1	0	12.4697	53.2374	4	5	4	1	139	14.681	10.49	11.4856	4
FALSE	High	Master Protein	A0A083WBD9	Uncharacterized protein OS=Mycobacterium bovis GN=MBO1_03388 PE=4 SV=1	0	12.4406	17.0635	3	3	3	1	252	28.003	6.01	5.74996	3
FALSE	High	Master Protein	A0A0H3M5H1	Putative initiation inhibitor protein OS=Mycobacterium bovis (strain BCG / Pasteur 1173P2) GN=BCG_1747 PE=4 SV=1	0	12.4137	29.2453	5	5	5	1	318	34.389	6.44	5.28705	5
FALSE	High	Master Protein	A0A0H3P1H4	PHOSPHOTYROSINE PROTEIN PHOSPHATASE PTPB (PROTEIN-TYROSINE-PHOSPHATASE) (PTPase) OS=Mycobacterium bovis (strain ATCC BAA-935 / AF2122/97) GN=ptbB PE=4 SV=1	0	12.4113	17.3913	3	4	3	1	276	30.077	6.58	8.57289	3
FALSE	High	Master Protein	A0A083VSM7	Putative lipoprotein LpqE OS=Mycobacterium bovis GN=BOVR_18695 PE=4 SV=1	0	12.3592	39.011	4	5	4	1	182	18.807	9.35	12.2817	4
FALSE	High	Master Protein	P66430	30S ribosomal protein S15 OS=Mycobacterium bovis (strain ATCC BAA-935 / AF2122/97) GN=rpsO PE=3 SV=1	0	12.3133	44.9438	5	6	5	1	89	10.469	10.45	13.2149	5
FALSE	High	Master Protein	A0A0H3M345	Uncharacterized protein OS=Mycobacterium bovis (strain BCG / Pasteur 1173P2) GN=BCG_1114 PE=4 SV=1	0	12.2888	20.4724	4	4	4	1	254	28.928	6.76	10.6315	4
FALSE	High	Master Protein	A0A0H3M187	Probable oxidoreductase OS=Mycobacterium bovis (strain BCG / Pasteur 1173P2) GN=BCG_0099 PE=3 SV=1	0	12.2847	26.7327	4	5	3	1	303	32.393	8.46	7.46413	4
FALSE	High	Master Protein	A1KMX0	Uracil-DNA glycosylase OS=Mycobacterium bovis (strain BCG / Pasteur 1173P2) GN=ung PE=3 SV=1	0	12.2839	25.5507	3	3	3	1	227	24.466	9.01	7.0896	3
FALSE	High	Master Protein	A0A0K2HQK1	Cell wall synthesis protein CwsA OS=Mycobacterium bovis BCG GN=cwsA PE=3 SV=1	0	12.2437	44.8276	3	4	3	1	145	15.671	11.41	2.91898	3
FALSE	High	Master Protein	A0A083WMK1	Conserved protein OS=Mycobacterium bovis GN=BOVR_01010 PE=4 SV=1	0	12.2429	46.875	3	6	3	1	96	10.358	8.53	10.206	3
FALSE	High	Master Protein	P69231	30S ribosomal protein S18 1 OS=Mycobacterium bovis (strain ATCC BAA-935 / AF2122/97) GN=rpsR1 PE=3 SV=1	0	12.2392	30.9524	3	5	3	1	84	9.537	10.61	10.6272	3
FALSE	High	Master Protein	A1KMQ3	30S ribosomal protein S16 OS=Mycobacterium bovis (strain BCG / Pasteur 1173P2) GN=rpsP PE=3 SV=1	0	12.2111	56.1728	4	5	4	1	162	17.426	9.88	8.95734	4
FALSE	High	Master Protein	P66993	Anthranilate phosphoribosyltransferase OS=Mycobacterium bovis (strain ATCC BAA-935 / AF2122/97) GN=trpD PE=3 SV=1	0	12.1499	21.3514	4	5	4	1	370	37.716	6.44	10.5091	4
FALSE	High	Master Protein	A0A0H3P331	PROBABLE BETA-KETOACYL CoA THIOLASE FADA3 OS=Mycobacterium bovis (strain ATCC BAA-935 / AF2122/97) GN=fadA3 PE=3 SV=1	0	12.1422	31.358	6	6	6	1	405	42.628	5.05	3.40155	6
FALSE	High	Master Protein	P64280	Transcription elongation factor GreA OS=Mycobacterium bovis (strain ATCC BAA-935 / AF2122/97) GN=greA PE=3 SV=1	0	12.1362	43.9024	4	5	4	1	164	17.844	5	10.5106	4
FALSE	High	Master Protein	P65461	UDP-N-acetylenolpyruvoylglucosamine reductase OS=Mycobacterium bovis (strain ATCC BAA-935 / AF2122/97) GN=murB PE=3 SV=1	0	12.1033	33.0623	5	6	5	1	369	38.497	6.87	12.279	5
FALSE	High	Master Protein	A0A083VRS2	Probable decaprenylphosphoryl-D-2-keto erythropen tose reductase OS=Mycobacterium bovis GN=BOVR_19755 PE=4 SV=1	0	12.0632	19.2913	3	3	3	1	254	27.451	7.99	6.02251	3
FALSE	High	Master Protein	A0A0C7DEN5	Uncharacterized protein OS=Mycobacterium bovis GN=MBO1_01938 PE=4 SV=1	0	12.0069	15.0628	2	3	2	1	239	26.306	9	8.17595	2
FALSE	High	Master Protein	A1KIM7	Triosephosphate isomerase OS=Mycobacterium bovis (strain BCG / Pasteur 1173P2) GN=tpiA PE=3 SV=1	0	11.9958	21.4559	3	4	3	1	261	27.374	5.92	11.8077	3
FALSE	High	Master Protein	A0A0K2HUB3	Ribosome-binding ATPase YchF OS=Mycobacterium bovis BCG GN=ychF PE=3 SV=1	0	11.9956	27.451	5	5	5	1	357	38.088	4.93	8.86505	5
FALSE	High	Master Protein	A0A083WB08	Co-chaperone YbbN OS=Mycobacterium bovis GN=BOVR_07045 PE=4 SV=1	0	11.9893	12.8289	2	4	2	1	304	32.151	4.79	8.4691	2
FALSE	High	Master Protein	A0A0V7XKI6	O-succinylbenzoic acid--CoA ligase OS=Mycobacterium bovis GN=BOVR_02835 PE=4 SV=1	0	11.9712	19.4595	4	4	4	1	370	37.487	6.04	4.96749	4
FALSE	High	Master Protein	A0A0C7DCL8	Transcriptional repressor NrdR OS=Mycobacterium bovis GN=nrdR PE=3 SV=1	0	11.9432	20.4819	3	3	3	1	166	18.295	7.37	10.048	3
FALSE	High	Master Protein	A0A083WMQ5	Acyl-CoA dehydrogenase (Probable acyl-CoA dehydro genase FadE5) OS=Mycobacterium bovis GN=MBO_303490 PE=3 SV=1	0	11.9291	16.2029	6	7	6	1	611	65.975	5.58	11.2555	6
FALSE	High	Master Protein	A0A0H3MDG1	Uncharacterized protein OS=Mycobacterium bovis (strain BCG / Pasteur 1173P2) GN=TB15.3 PE=3 SV=1	0	11.9148	54.7945	4	4	4	1	146	15.303	5.83	8.78915	4
FALSE	High	Master Protein	A0A0H4XYQ1	TetR family transcriptional regulator OS=Mycobacterium bovis GN=BOVR_16625 PE=4 SV=1	0	11.8951	31.1404	4	4	4	1	228	25.151	6.62	6.0822	4
FALSE	High	Master Protein	A0A0H3MAQ2	Galactofuranosyl transferase OS=Mycobacterium bovis (strain BCG / Pasteur 1173P2) GN=BCG_3870c PE=4 SV=1	0	11.8501	11.303	5	6	5	1	637	71.461	7.15	5.59797	5
FALSE	High	Master Protein	A0A0C7DDJ8	Uncharacterized protein OS=Mycobacterium bovis GN=MBO1_00873 PE=4 SV=1	0	11.8463	25.4237	3	3	3	1	236	25.241	4.87	6.51784	3
FALSE	High	Master Protein	A0A0C7DAW4	Uncharacterized protein OS=Mycobacterium bovis GN=MBO1_00704 PE=4 SV=1	0	11.8434	15.4812	3	4	3	1	239	26.247	9.5	5.49589	3
FALSE	High	Master Protein	A0A0H3P5U9	HYPOTHETICAL OXIDOREDUCTASE OS=Mycobacterium bovis (strain ATCC BAA-935 / AF2122/97) GN=Mb3259c PE=4 SV=1	0	11.8296	18.6842	4	6	4	1	380	40.716	9.09	13.846	4
FALSE	High	Master Protein	A0A083W4K4	Universal stress protein Rv2005c/MT2061 (USP Rv20 05c) OS=Mycobacterium bovis GN=BOVR_10370 PE=3 SV=1	0	11.8233	31.1864	4	4	4	1	295	30.966	5.82	7.13517	4
FALSE	High	Master Protein	A0A083W8P4	Uncharacterized protein OS=Mycobacterium bovis GN=BOVR_07900 PE=4 SV=1	0	11.8135	26.5092	6	6	6	1	381	41.257	6.38	9.25007	6
FALSE	High	Master Protein	A0A0H3P7L5	Probable phosphomannomutase pmma (Pmm) (Phosphomannose mutase) OS=Mycobacterium bovis (strain ATCC BAA-935 / AF2122/97) GN=pmma PE=4 SV=1	0	11.7854	9.24731	2	4	2	1	465	49.037	4.89	9.6688	2
FALSE	High	Master Protein	A0A0H3M2D0	Phosphoribosylformylglycinamidine synthase subunit PurQ OS=Mycobacterium bovis (strain BCG / Pasteur 1173P2) GN=purQ PE=3 SV=1	0	11.7627	25	3	4	3	1	224	23.618	4.97	4.28931	3
FALSE	High	Master Protein	A0A0H3M466	50S ribosomal protein L7/L12 OS=Mycobacterium bovis (strain BCG / Pasteur 1173P2) GN=rplL PE=3 SV=1	0	11.7581	36.9231	5	5	5	1	130	13.432	4.65	8.37452	5
FALSE	High	Master Protein	A0A0H3P631	CONSERVED HYPOTHETICAL MCE ASSOCIATED ALANINE AND VALINE RICH PROTEIN OS=Mycobacterium bovis (strain ATCC BAA-935 / AF2122/97) GN=Mb3523c PE=4 SV=1	0	11.723	43.3884	5	5	5	1	242	25.595	10.11	10.497	5
FALSE	High	Master Protein	A0A083VRU8	(2Fe-2S)-binding protein OS=Mycobacterium bovis GN=BOVR_19895 PE=4 SV=1	0	11.6775	17.0543	4	4	4	1	516	57.611	5.39	10.9821	4
FALSE	High	Master Protein	A0A0C7DLX1	Putative pterin-4-alpha-carbinolamine dehydratase OS=Mycobacterium bovis GN=MBO1_02233 PE=3 SV=1	0	11.6755	32.6733	4	5	4	1	101	11.237	6.37	10.0211	4
FALSE	High	Master Protein	C1AL56	50S ribosomal protein L30 OS=Mycobacterium bovis (strain BCG / Tokyo 172 / ATCC 35737 / TMC 1019) GN=rpmD PE=3 SV=1	0	11.6554	43.0769	2	4	2	1	65	7.342	11.82	11.8127	2
FALSE	High	Master Protein	A0A0C7DQH9	3-oxoacyl-[acyl-carrier-protein] synthase 3 OS=Mycobacterium bovis GN=fabH PE=3 SV=1	0	11.6393	19.403	4	5	4	1	335	34.793	5.26	7.09737	4
FALSE	High	Master Protein	P0A5T5	Phosphoribosylaminoimidazole-succinocarboxamide synthase OS=Mycobacterium bovis (strain ATCC BAA-935 / AF2122/97) GN=purC PE=3 SV=1	0	11.629	28.6195	5	5	5	1	297	32.91	5.34	7.17205	5
FALSE	High	Master Protein	A0A0H3MA19	Probable fatty-acid-CoA ligase fadD4 OS=Mycobacterium bovis (strain BCG / Pasteur 1173P2) GN=fadD4 PE=4 SV=1	0	11.6175	10.0559	3	3	3	1	537	58.865	5.94	10.4401	3
FALSE	High	Master Protein	A0A0C7DFC9	Sulfurtransferase OS=Mycobacterium bovis GN=BOVR_11865 PE=4 SV=1	0	11.5795	24.6479	3	3	3	1	284	29.324	5.55	8.80223	3
FALSE	High	Master Protein	C1ANS5	N-acetyl-gamma-glutamyl-phosphate reductase OS=Mycobacterium bovis (strain BCG / Tokyo 172 / ATCC 35737 / TMC 1019) GN=argC PE=3 SV=1	0	11.5176	12.2159	3	3	3	1	352	36.282	6.71	8.25694	3
FALSE	High	Master Protein	A0A083WFG7	Ribosomal RNA small subunit methyltransferase I OS=Mycobacterium bovis GN=rsmI PE=3 SV=1	0	11.4775	22.4561	4	4	4	1	285	29.647	6.77	5.36544	4
FALSE	High	Master Protein	A0A0C7DG55	Mycothiol acetyltransferase OS=Mycobacterium bovis GN=mshD PE=3 SV=1	0	11.4555	27.9365	5	6	5	1	315	33.609	8.5	10.4072	5
FALSE	High	Master Protein	A0A0Y1C6S8	Two-component system transcriptional regulator OS=Mycobacterium bovis BCG GN=RN06_1984 PE=4 SV=1	0	11.4427	20.1923	3	4	3	1	208	22.972	5.11	11.1911	3
FALSE	High	Master Protein	A0A0H3P5C5	Conserved protein OS=Mycobacterium bovis (strain ATCC BAA-935 / AF2122/97) GN=Mb2979c PE=4 SV=1	0	11.4391	17.757	3	4	3	1	321	35.909	8.87	8.45502	3
FALSE	High	Master Protein	A0A0H3M8T0	Possible transmembrane phospholipid biosynthesis bifunctionnal enzyme plsC: putative l-3-phosphoserine phosphatase + 1-ACYL-SN-GLYCEROL-3-PHOSPHATE ACYLTRANSFERASE OS=Mycobacterium bovis (strain BCG / Pasteur 1173P2) GN=plsC PE=4 SV=1	0	11.4332	18.6207	5	5	5	1	580	61.704	9.64	5.32716	5
FALSE	High	Master Protein	A0A0C7DGH8	D-alanine--D-alanine ligase OS=Mycobacterium bovis GN=ddl PE=3 SV=1	0	11.398	22.5201	5	6	5	1	373	39.656	5.5	6.56437	5
FALSE	High	Master Protein	A0A0C7DVP1	Possible transferase (Possibly glycosyltransferas e) OS=Mycobacterium bovis GN=MBO_303667 PE=4 SV=1	0	11.3725	18.0685	4	4	4	1	321	35.195	9.32	6.83425	4
FALSE	High	Master Protein	A0A0K2HXS5	Pyruvate dehydrogenase E1 component OS=Mycobacterium bovis BCG GN=RN06_2752 PE=4 SV=1	0	11.3681	7.52688	4	4	4	1	930	103.376	5.97	9.26744	4
FALSE	High	Master Protein	C1ANN5	Tryptophan synthase alpha chain OS=Mycobacterium bovis (strain BCG / Tokyo 172 / ATCC 35737 / TMC 1019) GN=trpA PE=3 SV=1	0	11.3313	20	3	3	3	1	270	27.71	5.06	6.05764	3
FALSE	High	Master Protein	A0A0C7DCB3	Deoxyuridine 5'-triphosphate nucleotidohydrolase OS=Mycobacterium bovis GN=dut PE=3 SV=1	0	11.328	26.1628	3	4	3	1	172	17.702	7.03	5.7054	3
FALSE	High	Master Protein	A0A083VW64	NrdH-redoxin OS=Mycobacterium bovis GN=BOVR_16570 PE=4 SV=1	0	11.2935	50	3	3	3	1	84	8.958	7.99	6.03852	3
FALSE	High	Master Protein	A0A0G4DQW9	MCE family protein 1A (Mce-family protein Mce1A) OS=Mycobacterium bovis GN=MBO_502705 PE=4 SV=1	0	11.2777	18.7225	4	5	4	1	454	47.719	5.35	7.5873	4
FALSE	High	Master Protein	A0A0H3P7F5	POSSIBLE MUTATOR PROTEIN MUTT3 (7,8-DIHYDRO-8-OXOGUANINE-TRIPHOSPHATASE) (8-OXO-DGTPASE) (DGTP PYROPHOSPHOHYDROLASE) OS=Mycobacterium bovis (strain ATCC BAA-935 / AF2122/97) GN=mutT3 PE=3 SV=1	0	11.2647	18.4332	3	4	3	1	217	23.485	5.17	2.46942	3
FALSE	High	Master Protein	A0A0H3MES3	Probable inosine-5'-monophosphate dehydrogenase guaB3 OS=Mycobacterium bovis (strain BCG / Pasteur 1173P2) GN=guaB3 PE=4 SV=1	0	11.218	25.6	4	4	4	1	375	38.967	5.34	10.8717	4
FALSE	High	Master Protein	A0A0H3M1J6	Probable molybdopterin biosynthesis protein moeA2 OS=Mycobacterium bovis (strain BCG / Pasteur 1173P2) GN=moeA2 PE=4 SV=1	0	11.2153	13.5802	3	3	3	1	405	41.977	5.96	7.30779	3
FALSE	High	Master Protein	C1AJ79	50S ribosomal protein L9 OS=Mycobacterium bovis (strain BCG / Tokyo 172 / ATCC 35737 / TMC 1019) GN=rplI PE=3 SV=1	0	11.1361	26.9737	3	4	3	1	152	16.16	8.97	7.26183	3
FALSE	High	Master Protein	A0A0G2Q9K8	Probable two component sensor kinase OS=Mycobacterium bovis (strain BCG / Pasteur 1173P2) GN=BCG_3247c PE=4 SV=1	0	11.0625	19.7605	5	6	5	1	501	53.978	5.88	4.37171	5
FALSE	High	Master Protein	P65486	Probable methylmalonyl-CoA mutase small subunit OS=Mycobacterium bovis (strain ATCC BAA-935 / AF2122/97) GN=mutA PE=3 SV=1	0	11.0435	16.4228	6	6	6	1	615	64.705	5.53	4.49261	6
FALSE	High	Master Protein	Q7U272	Protein GrpE OS=Mycobacterium bovis (strain ATCC BAA-935 / AF2122/97) GN=grpE PE=3 SV=1	0	11.0411	10.6383	2	3	2	1	235	24.544	4.58	7.20788	2
FALSE	High	Master Protein	A0A0M4NCZ4	Inositol-3-phosphate synthase OS=Mycobacterium bovis GN=BOVR_00250 PE=4 SV=1	0	11.036	31.3351	5	7	5	1	367	39.958	5.14	9.04148	5
FALSE	High	Master Protein	A0A0H3P1X1	POSSIBLE PEROXIDASE BPOC (NON-HAEM PEROXIDASE) OS=Mycobacterium bovis (strain ATCC BAA-935 / AF2122/97) GN=bpoC PE=4 SV=1	0	11.0218	35.4962	4	6	4	1	262	28.363	5.47	9.43767	4
FALSE	High	Master Protein	A0A083WBF9	Pyruvate kinase OS=Mycobacterium bovis GN=MBO1_03408 PE=3 SV=1	0	10.9806	17.3729	4	5	4	1	472	50.653	5.68	7.74535	4
FALSE	High	Master Protein	A0A0H3MHJ6	N5-carboxyaminoimidazole ribonucleotide mutase OS=Mycobacterium bovis (strain BCG / Pasteur 1173P2) GN=purE PE=3 SV=1	0	10.98	34.4828	4	5	4	1	174	17.762	6.57	10.8665	4
FALSE	High	Master Protein	P0A527	ATP-dependent Clp protease proteolytic subunit 1 OS=Mycobacterium bovis (strain ATCC BAA-935 / AF2122/97) GN=clpP1 PE=3 SV=1	0	10.928	13.5	2	2	2	1	200	21.694	4.92	6.93591	2
FALSE	High	Master Protein	A0A0H4XUH9	Phenylalanine--tRNA ligase alpha subunit OS=Mycobacterium bovis GN=pheS PE=3 SV=1	0	10.8804	17.8977	4	4	4	1	352	38.518	5.29	6.81675	4
FALSE	High	Master Protein	A0A0C7DLV4	Uncharacterized protein OS=Mycobacterium bovis GN=MBO1_02219 PE=4 SV=1	0	10.819	33.758	5	5	5	1	157	17.684	10.45	8.41343	5
FALSE	High	Master Protein	A0A0C7DGC6	Thioesterase OS=Mycobacterium bovis GN=MBO1_02691 PE=4 SV=1	0	10.8121	15.5894	2	9	2	1	263	29.351	5.36	11.4468	2
FALSE	High	Master Protein	A0A0C7DT08	Prephenate dehydratase OS=Mycobacterium bovis GN=pheA PE=4 SV=1	0	10.8015	16.4087	3	3	3	1	323	33.799	5.41	8.0389	3
FALSE	High	Master Protein	A0A0H3P2C2	Conserved protein OS=Mycobacterium bovis (strain ATCC BAA-935 / AF2122/97) GN=Mb0321 PE=4 SV=1	0	10.7881	32.8125	3	4	3	1	128	13.94	4.59	9.89599	3
FALSE	High	Master Protein	A0A0H3MAB7	Uncharacterized protein OS=Mycobacterium bovis (strain BCG / Pasteur 1173P2) GN=BCG_1504c PE=4 SV=1	0	10.7661	16.1491	2	4	2	1	161	18.305	10.87	10.3497	2
FALSE	High	Master Protein	A0A0C7DGF2	Chorismate pyruvate lyase OS=Mycobacterium bovis GN=MBO1_02715 PE=4 SV=1	0	10.7626	25.4902	3	3	3	1	204	23.189	9.11	7.51736	3
FALSE	High	Master Protein	A0A0K2I243	Bifunctional penicillin-insensitive transglycosylase/penicillin-sensitive transpeptidase OS=Mycobacterium bovis BCG GN=RN06_4490 PE=4 SV=1	0	10.7451	8.02469	5	5	5	1	810	84.583	5.52	6.20145	5
FALSE	High	Master Protein	A0A0C7DLG9	Transcriptional regulator, MarR family OS=Mycobacterium bovis GN=MBO1_02503 PE=4 SV=1	0	10.7183	16.5714	3	3	3	1	175	19.001	5.39	8.17687	3
FALSE	High	Master Protein	A0A0H3P8U5	POSSIBLE LIPASE LIPV OS=Mycobacterium bovis (strain ATCC BAA-935 / AF2122/97) GN=lipV PE=4 SV=1	0	10.7112	37.5479	4	4	4	1	261	27.851	5.86	7.35684	4
FALSE	High	Master Protein	A0A0H3P451	Conserved protein OS=Mycobacterium bovis (strain ATCC BAA-935 / AF2122/97) GN=Mb2068c PE=4 SV=1	0	10.7069	13.5849	3	3	3	1	265	29.073	9.11	6.36524	3
FALSE	High	Master Protein	A0A0H3P5K7	Alternative rna polymerase sigma factor sigf OS=Mycobacterium bovis (strain ATCC BAA-935 / AF2122/97) GN=sigF PE=3 SV=1	0	10.6768	21.4559	3	3	3	1	261	28.776	6.57	5.64891	3
FALSE	High	Master Protein	A0A093MAE1	N-acetylmuramoyl-L-alanine amidase OS=Mycobacterium bovis GN=MBO1_00892 PE=4 SV=1	0	10.6724	37.9447	5	5	5	1	253	26.119	9.45	9.29439	5
FALSE	High	Master Protein	A0A0H3MBB6	Probable short-chain type dehydrogenase/reductase OS=Mycobacterium bovis (strain BCG / Pasteur 1173P2) GN=BCG_3549c PE=4 SV=1	0	10.6676	21.6561	4	4	4	1	314	33.173	7.18	7.71373	4
FALSE	High	Master Protein	A0A083W200	ATP-dependent Clp protease proteolytic subunit OS=Mycobacterium bovis GN=clpP PE=3 SV=1	0	10.6625	46.2617	5	5	5	1	214	23.525	5.15	4.4902	5
FALSE	High	Master Protein	A0A083W2C4	Branched-chain-amino-acid aminotransferase OS=Mycobacterium bovis GN=BOVR_11440 PE=3 SV=1	0	10.6423	14.4022	4	6	4	1	368	39.583	5.91	14.452	4
FALSE	High	Master Protein	A0A0C7DTH6	Uncharacterized protein OS=Mycobacterium bovis GN=MBO_303246 PE=4 SV=1	0	10.6335	34.6278	4	4	4	1	309	32.145	8.75	4.74132	4
FALSE	High	Master Protein	A0A0C7DE57	Conserved protein OS=Mycobacterium bovis GN=MBO1_01894 PE=4 SV=1	0	10.5938	12.9456	3	4	3	1	533	56.44	5.69	3.58858	3
FALSE	High	Master Protein	A0A083VZH4	Probable transcriptional regulatory protein BOVR_13525 OS=Mycobacterium bovis GN=BOVR_13525 PE=3 SV=1	0	10.5792	26.2948	3	3	3	1	251	26.782	4.77	5.68663	3
FALSE	High	Master Protein	A0A0H3M538	Possible fatty-acid-CoA ligase fadD11 OS=Mycobacterium bovis (strain BCG / Pasteur 1173P2) GN=fadD11 PE=4 SV=1	0	10.5708	18.5471	6	7	6	1	647	70.341	6.09	9.54504	6
FALSE	High	Master Protein	A0A0H3P5G3	Polyphosphate kinase ppk2 (Polyphosphoric acid kinase) OS=Mycobacterium bovis (strain ATCC BAA-935 / AF2122/97) GN=ppk2 PE=4 SV=1	0	10.5523	17.2881	3	3	3	1	295	34.103	9.54	7.42931	3
FALSE	High	Master Protein	A0A0M5LHI1	UPF0182 protein BOVR_16530 OS=Mycobacterium bovis GN=BOVR_16530 PE=3 SV=1	0	10.52	5.44355	3	4	3	1	992	107.408	8.9	9.4643	3
FALSE	High	Master Protein	A0A120IPA8	Laccase domain protein OS=Mycobacterium bovis BCG GN=RN06_2637 PE=3 SV=1	0	10.5157	20.5993	3	3	3	1	267	27.657	6.68	5.62977	3
FALSE	High	Master Protein	P63569	Acetylornithine aminotransferase OS=Mycobacterium bovis (strain ATCC BAA-935 / AF2122/97) GN=argD PE=3 SV=1	0	10.5038	17	4	5	4	1	400	40.884	6.52	4.12592	4
FALSE	High	Master Protein	A0A0K2HTT9	Methionine aminopeptidase OS=Mycobacterium bovis BCG GN=map PE=3 SV=1	0	10.4656	22.9323	3	4	3	1	266	27.26	5.76	9.51221	3
FALSE	High	Master Protein	A0A0K2HWH2	Anthranilate synthase component I OS=Mycobacterium bovis BCG GN=RN06_1964 PE=4 SV=1	0	10.4592	6.58915	2	3	2	1	516	55.814	5.16	4.91958	2
FALSE	High	Master Protein	A0A083WIK1	UPF0234 protein BOVR_02955 OS=Mycobacterium bovis GN=BOVR_02955 PE=3 SV=1	0	10.4477	14.1104	3	3	3	1	163	18.067	9.2	6.0621	3
FALSE	High	Master Protein	A0A0H3M2F1	Possible udp-glucose 4-epimerase galE2 OS=Mycobacterium bovis (strain BCG / Pasteur 1173P2) GN=galE2 PE=4 SV=1	0	10.4059	21.8085	6	6	6	1	376	41.038	10.37	9.12323	6
FALSE	High	Master Protein	A0A083W617	Geranylgeranyl pyrophosphate synthase OS=Mycobacterium bovis GN=BOVR_11245 PE=3 SV=1	0	10.3665	11.9318	3	3	3	1	352	37.758	6.74	4.8848	3
FALSE	High	Master Protein	P0A643	Uncharacterized NTE family protein Mb2594 OS=Mycobacterium bovis (strain ATCC BAA-935 / AF2122/97) GN=Mb2594 PE=3 SV=1	0	10.3239	17.6672	5	6	5	1	583	62.085	6.32	6.87898	5
FALSE	High	Master Protein	A0A0C7DIQ8	Invasion-associated protein OS=Mycobacterium bovis GN=MBO1_03637 PE=4 SV=1	0	10.2836	22.5296	3	3	3	1	253	26.02	9.85	6.87641	3
FALSE	High	Master Protein	A0A0H3MD48	Probable methyltransferase OS=Mycobacterium bovis (strain BCG / Pasteur 1173P2) GN=BCG_1575 PE=4 SV=1	0	10.282	15.2738	3	4	3	1	347	37.891	8.12	4.63562	3
FALSE	High	Master Protein	A0A0H3P8Z7	Deazaflavin-dependent nitroreductase ddn OS=Mycobacterium bovis (strain ATCC BAA-935 / AF2122/97) GN=ddn PE=4 SV=1	0	10.1101	48.3444	5	5	5	1	151	17.36	9.5	9.98294	5
FALSE	High	Master Protein	A0A0H3P6X9	Thioredoxin reductase OS=Mycobacterium bovis (strain ATCC BAA-935 / AF2122/97) GN=trxB2 PE=3 SV=1	0	9.95607	15.5224	3	3	3	1	335	35.563	5.67	7.23642	3
FALSE	High	Master Protein	A0A0K2HSP2	Probable endonuclease 4 OS=Mycobacterium bovis BCG GN=nfo PE=3 SV=1	0	9.88695	30.5556	3	4	3	1	252	26.829	5.64	2.63114	3
FALSE	High	Master Protein	A0A0C7DD30	Oxidoreductase, short-chain dehydrogenase/reducta se family OS=Mycobacterium bovis GN=MBO1_01506 PE=3 SV=1	0	9.88173	8.70968	2	2	2	1	310	33.07	9.52	6.28218	2
FALSE	High	Master Protein	A0A0K2HUX2	Membrane protein OS=Mycobacterium bovis BCG GN=RN06_1696 PE=4 SV=1	0	9.87319	24.0909	2	2	2	1	220	23.447	4.75	7.00008	2
FALSE	High	Master Protein	A0A0Y1C3I9	1,4-dihydroxy-2-naphthoyl-CoA synthase OS=Mycobacterium bovis BCG GN=menB PE=3 SV=1	0	9.84392	17.8363	4	4	4	1	342	37.725	8.27	6.65568	4
FALSE	High	Master Protein	A0A083W6T5	Tyrosine recombinase XerD OS=Mycobacterium bovis GN=xerD PE=3 SV=1	0	9.84174	18.328	4	4	4	1	311	33.497	10.26	4.71576	4
FALSE	High	Master Protein	A0A0K2I015	Uncharacterized protein OS=Mycobacterium bovis BCG GN=RN06_3622 PE=4 SV=1	0	9.83931	20.2454	2	2	2	1	163	18.222	6.55	6.2464	2
FALSE	High	Master Protein	A0A0H3P8S0	Conserved protein OS=Mycobacterium bovis (strain ATCC BAA-935 / AF2122/97) GN=Mb3072c PE=4 SV=1	0	9.80916	49.1935	3	3	3	1	124	13.375	5.07	6.99807	3
FALSE	High	Master Protein	A0A083WDK0	Amidase OS=Mycobacterium bovis GN=BOVR_06695 PE=3 SV=1	0	9.80643	10.8225	2	3	2	1	462	49.05	7.17	5.53259	2
FALSE	High	Master Protein	A0A0H3M924	Uncharacterized protein OS=Mycobacterium bovis (strain BCG / Pasteur 1173P2) GN=BCG_0950c PE=4 SV=1	0	9.79647	33.3333	2	2	2	1	87	9.914	6.55	6.75345	2
FALSE	High	Master Protein	A1KPR8	2-C-methyl-D-erythritol 4-phosphate cytidylyltransferase OS=Mycobacterium bovis (strain BCG / Pasteur 1173P2) GN=ispD PE=3 SV=1	0	9.78185	29.8701	4	4	4	1	231	24.059	4.89	9.16874	4
FALSE	High	Master Protein	A0A0C7DF89	Acyltransferase papA3 (Polyketide sy nthase-associated protein A3) OS=Mycobacterium bovis GN=MBO1_02256 PE=4 SV=1	0	9.75961	27.5424	5	5	5	1	472	51.543	5.87	7.09614	5
FALSE	High	Master Protein	P0A5N5	Alkyl hydroperoxide reductase AhpD OS=Mycobacterium bovis (strain ATCC BAA-935 / AF2122/97) GN=ahpD PE=3 SV=1	0	9.75447	29.9435	3	4	3	1	177	18.769	7.03	7.74045	3
FALSE	High	Master Protein	A0A0H3MEW8	Probable Rieske iron-sulfur protein QcrA OS=Mycobacterium bovis (strain BCG / Pasteur 1173P2) GN=qcrA PE=4 SV=1	0	9.73362	20.0466	4	5	4	1	429	46.875	6.15	6.15329	4
FALSE	High	Master Protein	O52585	Putative uncharacterized protein OS=Mycobacterium bovis BCG PE=4 SV=1	0	9.72825	20.4633	3	5	3	1	259	27.071	11.71	8.75856	3
FALSE	High	Master Protein	A0A0H4G0M1	DNA polymerase III subunit beta OS=Mycobacterium bovis BCG GN=RN06_0002 PE=4 SV=1	0	9.7136	10.199	3	5	3	1	402	42.029	4.93	6.53213	3
FALSE	High	Master Protein	A0A0K2HV38	Uncharacterized protein OS=Mycobacterium bovis BCG GN=RN06_1767 PE=4 SV=1	0	9.71262	26.9091	4	4	4	1	275	29.893	7.06	4.78115	4
FALSE	High	Master Protein	A0A0C7DPF8	Uncharacterized protein Rv2715/MT2788 OS=Mycobacterium bovis GN=MBO_302081 PE=4 SV=1	0	9.705	18.1818	4	4	4	1	341	36.908	9.07	7.17903	4
FALSE	High	Master Protein	A0A083W6R1	Uncharacterized protein OS=Mycobacterium bovis GN=MBO1_03470 PE=4 SV=1	0	9.69785	28.2051	3	3	3	1	234	25.861	9.1	6.0511	3
FALSE	High	Master Protein	A0A0C7DDN5	50S ribosomal protein L21 OS=Mycobacterium bovis GN=rplU PE=3 SV=1	0	9.65238	36.8421	3	3	3	1	114	12.308	9.91	8.42585	3
FALSE	High	Master Protein	C1ANT2	Argininosuccinate lyase OS=Mycobacterium bovis (strain BCG / Tokyo 172 / ATCC 35737 / TMC 1019) GN=argH PE=3 SV=1	0	9.6477	10.8511	3	3	3	1	470	49.744	5.3	7.11394	3
FALSE	High	Master Protein	A0A0C7DPJ5	Sulfate/thiosulfate import ATP-binding protein CysA OS=Mycobacterium bovis GN=cysA PE=3 SV=1	0	9.64667	16.9972	3	3	3	1	353	37.68	9.31	6.91426	3
FALSE	High	Master Protein	A0A0H3MFM6	Diacylglycerol O-acyltransferase OS=Mycobacterium bovis (strain BCG / Pasteur 1173P2) GN=BCG_2502c PE=3 SV=1	0	9.6432	16.2933	4	4	4	1	491	52.334	7.55	8.3221	4
FALSE	High	Master Protein	A0A0H3P2G5	Uncharacterized protein OS=Mycobacterium bovis (strain ATCC BAA-935 / AF2122/97) GN=Mb0429c PE=4 SV=1	0	9.63593	28.7081	4	4	4	1	209	21.724	9.41	10.1676	4
FALSE	High	Master Protein	A0A0C7DLQ5	Methyltransferase OS=Mycobacterium bovis GN=MBO1_02182 PE=4 SV=1	0	9.61659	29.5547	3	3	3	1	247	25.504	5.06	3.7542	3
FALSE	High	Master Protein	A0A083W0Z6	AAA family ATPase OS=Mycobacterium bovis GN=BOVR_13305 PE=4 SV=1	0	9.60816	11.9469	3	3	3	1	452	47.528	6.55	5.32147	3
FALSE	High	Master Protein	A0A0H3M2E0	Possible membrane protein OS=Mycobacterium bovis (strain BCG / Pasteur 1173P2) GN=BCG_0079c PE=4 SV=1	0	9.60284	14.8789	3	4	3	1	289	30.8	7.42	7.9128	3
FALSE	High	Master Protein	Q7TVQ7	Putative S-adenosyl-L-methionine-dependent methyltransferase Mb3793c OS=Mycobacterium bovis (strain ATCC BAA-935 / AF2122/97) GN=Mb3793c PE=3 SV=1	0	9.58308	23.2484	5	5	4	1	314	34.734	5.11	4.17449	5
FALSE	High	Master Protein	A0A0H3P1X5	DNA gyrase subunit A OS=Mycobacterium bovis (strain ATCC BAA-935 / AF2122/97) GN=gyrA PE=3 SV=1	0	9.57603	4.29594	3	3	3	1	838	92.245	5.69	6.30916	3
FALSE	High	Master Protein	A0A0H3MCE9	Possible conserved transmembrane protein OS=Mycobacterium bovis (strain BCG / Pasteur 1173P2) GN=BCG_2368 PE=4 SV=1	0	9.54873	20.9091	6	6	6	1	660	69.988	8.38	4.18379	6
FALSE	High	Master Protein	P0A617	Thioredoxin OS=Mycobacterium bovis (strain ATCC BAA-935 / AF2122/97) GN=trxA PE=3 SV=2	0	9.54217	65.5172	4	4	4	1	116	12.537	5.22	5.76147	4
FALSE	High	Master Protein	A0A0M4P739	Heat-inducible transcription repressor HrcA OS=Mycobacterium bovis GN=hrcA PE=3 SV=1	0	9.52603	12.2449	3	3	3	1	343	36.464	5.44	7.53667	3
FALSE	High	Master Protein	A0A0C7DH86	Coenzyme F420:L-glutamate ligase OS=Mycobacterium bovis GN=fbiB PE=3 SV=1	0	9.51927	12.5	4	4	4	1	448	47.505	5.33	3.65611	4
FALSE	High	Master Protein	A0A0H3M5J7	UDP-N-acetylmuramoyl-L-alanyl-D-glutamate--2,6-diaminopimelate ligase OS=Mycobacterium bovis (strain BCG / Pasteur 1173P2) GN=murE PE=3 SV=1	0	9.48836	13.4579	3	3	3	1	535	55.307	6.77	6.16202	3
FALSE	High	Master Protein	A0A0H3P791	PROBABLE ENOYL-COA HYDRATASE ECHA16 (ENOYL HYDRASE) (UNSATURATED ACYL-COA HYDRATASE) (CROTONASE) OS=Mycobacterium bovis (strain ATCC BAA-935 / AF2122/97) GN=echA16 PE=4 SV=1	0	9.48474	19.2771	3	3	3	1	249	26.561	5.92	7.49087	3
FALSE	High	Master Protein	A0A0H3M5N0	Probable transcriptional regulatory protein embR OS=Mycobacterium bovis (strain BCG / Pasteur 1173P2) GN=embR PE=4 SV=1	0	9.45169	15.7216	4	4	4	1	388	41.908	7.21	5.62944	4
FALSE	High	Master Protein	A0A0D1PVH6	Acyl-CoA thioesterase OS=Mycobacterium bovis GN=BOVR_08420 PE=4 SV=1	0	9.44493	18.9542	3	5	3	1	306	33.757	6.54	9.69183	3
FALSE	High	Master Protein	A0A0H3M4I3	Possible long-chain acyl-CoA synthase OS=Mycobacterium bovis (strain BCG / Pasteur 1173P2) GN=BCG_1721 PE=4 SV=1	0	9.44179	7.70771	4	4	4	1	999	107.327	6.48	4.80661	4
FALSE	High	Master Protein	A0A0H3MAH1	Putative oxidoreductase OS=Mycobacterium bovis (strain BCG / Pasteur 1173P2) GN=BCG_3785 PE=4 SV=1	0	9.35591	15.3153	4	4	4	1	333	34.751	5.67	5.9331	4
FALSE	High	Master Protein	A0A0H3M6S0	Possible short-chain dehydrogenase EphD OS=Mycobacterium bovis (strain BCG / Pasteur 1173P2) GN=ephD PE=4 SV=1	0	9.34242	12.1622	3	4	3	1	592	63.99	8.56	5.93934	3
FALSE	High	Master Protein	A0A0K2I1N1	dTDP-4-dehydrorhamnose reductase OS=Mycobacterium bovis BCG GN=RN06_3953 PE=4 SV=1	0	9.32328	22.3684	3	3	3	1	304	32.035	6.89	4.85389	3
FALSE	High	Master Protein	A0A0H3P956	PROBABLE CHROMOSOME PARTITIONING PROTEIN PARA OS=Mycobacterium bovis (strain ATCC BAA-935 / AF2122/97) GN=parA PE=4 SV=1	0	9.32209	20.4611	4	4	4	1	347	37.525	6.33	6.82617	4
FALSE	High	Master Protein	A0A0H3M1M2	Probable transcriptional regulatory protein OS=Mycobacterium bovis (strain BCG / Pasteur 1173P2) GN=BCG_0505c PE=4 SV=1	0	9.31723	20.2532	5	7	5	1	474	53.093	7.12	12.5034	5
FALSE	High	Master Protein	A0A0H3M949	N5-carboxyaminoimidazole ribonucleotide synthase OS=Mycobacterium bovis (strain BCG / Pasteur 1173P2) GN=purK PE=3 SV=1	0	9.30807	18.648	4	4	4	1	429	45.667	5.97	7.66154	4
FALSE	High	Master Protein	A0A0C7D9N9	Secreted protein OS=Mycobacterium bovis GN=MBO1_00038 PE=4 SV=1	0	9.30712	11.9454	2	3	2	1	293	30.81	8.27	5.87004	2
FALSE	High	Master Protein	A0A0K2I1Y9	Inorganic pyrophosphatase OS=Mycobacterium bovis BCG GN=ppa PE=3 SV=1	0	9.27831	30.2469	3	6	3	1	162	18.317	4.93	1.61374	3
FALSE	High	Master Protein	A0A109S6W1	Nucleoside triphosphate pyrophosphohydrolase OS=Mycobacterium bovis BCG GN=RN06_1276 PE=4 SV=1	0	9.27818	22.0859	4	4	4	1	326	35.522	5.39	7.51643	4
FALSE	High	Master Protein	A0A083W7T5	Acyl-CoA dehydrogenase OS=Mycobacterium bovis GN=BOVR_08730 PE=3 SV=1	0	9.25635	7.23861	2	2	1	1	373	37.852	5.25	4.02452	2
FALSE	High	Master Protein	A0A0K2HU45	Uncharacterized protein OS=Mycobacterium bovis BCG GN=RN06_1401 PE=4 SV=1	0	9.25489	23.1884	2	2	2	1	69	7.603	10.76	6.50365	2
FALSE	High	Master Protein	P64896	UPF0749 protein Mb1856 OS=Mycobacterium bovis (strain ATCC BAA-935 / AF2122/97) GN=Mb1856 PE=3 SV=1	0	9.21483	13.0137	2	3	2	1	292	30.626	6.81	5.54121	2
FALSE	High	Master Protein	A0A0H3P572	PROBABLE MEMBRANE PROTEIN OS=Mycobacterium bovis (strain ATCC BAA-935 / AF2122/97) GN=Mb2822 PE=4 SV=1	0	9.20814	22.381	3	3	3	1	210	22.972	7.3	5.49248	3
FALSE	High	Master Protein	A0A083WGQ8	Phosphate-binding protein PstS OS=Mycobacterium bovis GN=BOVR_04930 PE=3 SV=1	0	9.20446	15.9459	3	3	3	1	370	37.825	5.15	7.79783	3
FALSE	High	Master Protein	A0A083WKE5	Class II fructose-bisphosphate aldolase OS=Mycobacterium bovis GN=BOVR_01895 PE=3 SV=1	0	9.19304	28.4884	4	4	4	1	344	36.522	5.78	4.84213	4
FALSE	High	Master Protein	A0A0Y1D3G7	Glycolate oxidase subunit GlcD OS=Mycobacterium bovis BCG GN=RN06_2795 PE=4 SV=1	0	9.17844	13.0719	3	3	3	1	459	48.022	5.02	7.73722	3
FALSE	High	Master Protein	A0A0C7DDW4	Conserved protein OS=Mycobacterium bovis GN=MBO1_01618 PE=4 SV=1	0	9.1561	33.3333	3	3	3	1	78	8.502	8.97	3.98492	3
FALSE	High	Master Protein	A0A0C7DUG4	UDP-galactopyranose mutase (UGM) (U DP-GALP mutase) (Uridine 5-diphosphate galactopyranose muta se) OS=Mycobacterium bovis GN=MBO1_00661 PE=4 SV=1	0	9.13098	17.5439	4	5	4	1	399	45.786	5.81	7.86011	4
FALSE	High	Master Protein	A0A0H4YBM2	Phosphoadenosine phosphosulfate reductase OS=Mycobacterium bovis GN=cysH PE=3 SV=1	0	9.10978	27.9528	4	4	4	1	254	27.406	5.36	7.1537	4
FALSE	High	Master Protein	A0A0H3P5S6	Conserved protein OS=Mycobacterium bovis (strain ATCC BAA-935 / AF2122/97) GN=Mb1490 PE=4 SV=1	0	9.10488	31.3589	4	4	4	1	287	31.407	6.54	9.45148	4
FALSE	High	Master Protein	A0A0D1PTA8	Protein PafC (Proteasome accessory factor C) OS=Mycobacterium bovis GN=BOVR_10850 PE=4 SV=1	0	9.10172	26.8987	5	5	5	1	316	33.743	4.82	8.34475	5
FALSE	High	Master Protein	A0A083WL93	Conserved protein (Fructose-bisphosphate aldolase family protein) OS=Mycobacterium bovis GN=BOVR_01905 PE=4 SV=1	0	9.08379	20.2128	4	4	4	1	376	41.478	9.74	5.37978	4
FALSE	High	Master Protein	A0A0C7DG47	Phthiocerol/phthiodiolone dimycocerosyl transfera se (Acyltransferase PapA5) (Phthiocerol/phthio diolone O-acyltransferase) (Polyketide synthase-associated protein A5) OS=Mycobacterium bovis GN=MBO1_02705 PE=4 SV=1	0	9.0654	18.0328	3	3	3	1	427	45.914	5.03	5.83253	3
FALSE	High	Master Protein	A0A0H4G129	Glycerol-3-phosphate dehydrogenase OS=Mycobacterium bovis BCG GN=RN06_3991 PE=3 SV=1	0	9.04113	14.7009	5	5	5	1	585	62.739	6.74	4.89942	5
FALSE	High	Master Protein	A0A0H3P1T1	Conserved protein OS=Mycobacterium bovis (strain ATCC BAA-935 / AF2122/97) GN=Mb0473c PE=4 SV=1	0	9.02595	31.0526	5	5	5	1	190	21.291	9.72	6.42698	5
FALSE	High	Master Protein	A0A0K2HWF8	Uncharacterized protein OS=Mycobacterium bovis BCG GN=RN06_2321 PE=4 SV=1	0	8.97586	35.4701	4	4	4	1	234	25.555	4.94	5.23535	4
FALSE	High	Master Protein	A0A0K2HYM7	Haloalkane dehalogenase OS=Mycobacterium bovis BCG GN=dhaA PE=3 SV=1	0	8.9711	19.6667	3	4	3	1	300	33.679	5.14	7.03868	3
FALSE	High	Master Protein	A0A0C7DHS5	Uncharacterized protein OS=Mycobacterium bovis GN=MBO1_03198 PE=4 SV=1	0	8.96054	12.5786	2	3	2	1	159	17.671	7.99	3.91206	2
FALSE	High	Master Protein	A0A0H3M7F0	MCE-family protein mce1F OS=Mycobacterium bovis (strain BCG / Pasteur 1173P2) GN=mce1F PE=4 SV=1	0	8.95599	15.7282	4	4	4	1	515	53.988	5.86	6.94738	4
FALSE	High	Master Protein	A0A0C7DK96	Pseudouridine synthase OS=Mycobacterium bovis GN=MBO1_03504 PE=3 SV=1	0	8.95199	19.2913	3	3	3	1	254	27.58	9.33	7.43471	3
FALSE	High	Master Protein	Q09IV4	Outer membrane protein A OS=Mycobacterium bovis GN=BOVR_04750 PE=3 SV=1	0	8.94905	20.5521	3	3	3	1	326	33.554	7.39	6.93202	3
FALSE	High	Master Protein	A0A0H3M4G7	Amidophosphoribosyltransferase OS=Mycobacterium bovis (strain BCG / Pasteur 1173P2) GN=purF PE=3 SV=1	0	8.88805	13.4725	4	5	4	1	527	56.127	5.4	6.0703	4
FALSE	High	Master Protein	A0A0H3P6R3	Conserved protein OS=Mycobacterium bovis (strain ATCC BAA-935 / AF2122/97) GN=Mb3880 PE=4 SV=1	0	8.88242	27.5229	4	6	4	1	218	23.796	11.63	7.74507	4
FALSE	High	Master Protein	A0A0H3M7J4	Uncharacterized protein OS=Mycobacterium bovis (strain BCG / Pasteur 1173P2) GN=BCG_2638c PE=4 SV=1	0	8.85852	32.8205	3	3	3	1	195	21.855	6.81	8.1767	3
FALSE	High	Master Protein	A0A109S757	50S ribosomal protein L31 OS=Mycobacterium bovis BCG GN=rpmE PE=3 SV=1	0	8.85747	51.25	3	4	3	1	80	8.747	9.58	8.22724	3
FALSE	High	Master Protein	A0A083VT48	Putative acetolactate synthase large subunit IlvX (ALS) (Acetohydroxy-acid synthase large subun it) (AHAS) OS=Mycobacterium bovis GN=BOVR_18315 PE=4 SV=1	0	8.84637	10.4854	3	3	3	1	515	52.04	4.93	4.50471	3
FALSE	High	Master Protein	A0A0H3M801	Probable zinc protease pepR OS=Mycobacterium bovis (strain BCG / Pasteur 1173P2) GN=pepR PE=3 SV=1	0	8.83384	8.6758	3	3	3	1	438	47.043	7.46	4.4768	3
FALSE	High	Master Protein	A0A0H3M4P8	Uncharacterized protein OS=Mycobacterium bovis (strain BCG / Pasteur 1173P2) GN=BCG_1813 PE=4 SV=1	0	8.77014	21.9251	2	2	2	1	187	20.444	6.05	6.43638	2
FALSE	High	Master Protein	A0A0H3P6I4	Conserved protein OS=Mycobacterium bovis (strain ATCC BAA-935 / AF2122/97) GN=Mb3759 PE=4 SV=1	0	8.75904	9.09091	2	2	2	1	352	37.509	6.6	5.47171	2
FALSE	High	Master Protein	A0A0D1MJJ6	Translation initiation factor IF-2 OS=Mycobacterium bovis GN=infB PE=3 SV=1	0	8.75285	6.22222	3	4	3	1	900	93.984	6.37	7.62795	3
FALSE	High	Master Protein	A0A083VWD3	N-acetylglucosaminyl-diphospho-decaprenol L-rhamnosyltransferase OS=Mycobacterium bovis GN=BOVR_16925 PE=4 SV=1	0	8.74122	17.8218	2	2	2	1	303	33.455	9.73	5.24775	2
FALSE	High	Master Protein	A0A120IQ80	Peptide chain release factor 2 OS=Mycobacterium bovis BCG GN=prfB PE=3 SV=1	0	8.68184	16.1376	3	3	3	1	378	42.099	4.94	7.40546	3
FALSE	High	Master Protein	A0A0K2HX57	Membrane protein OS=Mycobacterium bovis BCG GN=RN06_2566 PE=4 SV=1	0	8.55499	15.1639	2	3	2	1	244	26.004	6.09	4.62844	2
FALSE	High	Master Protein	A1KJ21	Imidazole glycerol phosphate synthase subunit HisF OS=Mycobacterium bovis (strain BCG / Pasteur 1173P2) GN=hisF PE=3 SV=1	0	8.5332	20.9738	4	4	4	1	267	27.22	4.89	5.09264	4
FALSE	High	Master Protein	A0A083VRC1	ESX-1 secretion-associated protein EspF OS=Mycobacterium bovis GN=BOVR_20135 PE=4 SV=1	0	8.52061	22.3301	2	2	2	1	103	10.611	6.52	5.57082	2
FALSE	High	Master Protein	A0A0C7DP42	Nucleoside diphosphate kinase OS=Mycobacterium bovis GN=ndk PE=3 SV=1	0	8.51126	32.1429	3	3	3	1	140	14.869	5.48	3.9576	3
FALSE	High	Master Protein	A0A0H3MA44	Uncharacterized protein OS=Mycobacterium bovis (strain BCG / Pasteur 1173P2) GN=BCG_3709 PE=4 SV=1	0	8.50803	14.2029	2	3	2	1	345	37.944	6.1	6.75944	2
FALSE	High	Master Protein	A0A0M4NHX8	Phosphate-specific transport system accessory protein PhoU OS=Mycobacterium bovis GN=BOVR_17105 PE=3 SV=1	0	8.48821	23.0769	3	3	3	1	221	24.827	6.11	4.14403	3
FALSE	High	Master Protein	A0A083WA50	Bifunctional protein PyrR OS=Mycobacterium bovis GN=pyrR PE=3 SV=1	0	8.43889	15.0259	3	3	3	1	193	20.614	7.69	6.63479	3
FALSE	High	Master Protein	A0A083VZ88	Amidase OS=Mycobacterium bovis GN=BOVR_14940 PE=3 SV=1	0	8.43062	10.9937	3	4	3	1	473	50.885	7.14	7.55694	3
FALSE	High	Master Protein	A0A0C7DLG1	Uncharacterized protein OS=Mycobacterium bovis GN=MBO1_02386 PE=4 SV=1	0	8.41004	35.2041	4	5	4	1	196	20.87	6.15	12.5824	4
FALSE	High	Master Protein	A0A0C7DGS2	Translation initiation factor IF-1 OS=Mycobacterium bovis GN=infA PE=3 SV=1	0	8.39943	15.5172	2	2	2	1	116	13.181	7.37	5.61202	2
FALSE	High	Master Protein	A0A0H3M356	Possible enoyl-CoA hydratase echA9 OS=Mycobacterium bovis (strain BCG / Pasteur 1173P2) GN=echA9 PE=4 SV=1	0	8.39415	18.5507	3	4	3	1	345	36.332	5.1	8.20399	3
FALSE	High	Master Protein	A0A0H3M5G5	Possible alternative RNA polymerase sigma factor sigI OS=Mycobacterium bovis (strain BCG / Pasteur 1173P2) GN=sigI PE=3 SV=1	0	8.37778	9.97506	2	3	2	1	401	44.277	6.8	5.12323	2
FALSE	High	Master Protein	A0A0H3M2F6	tRNA-dihydrouridine synthase OS=Mycobacterium bovis (strain BCG / Pasteur 1173P2) GN=BCG_0876c PE=3 SV=1	0	8.36392	13.6247	3	4	3	1	389	41.374	7.52	6.47551	3
FALSE	High	Master Protein	O69443	Divalent metal cation transporter MntH OS=Mycobacterium bovis (strain ATCC BAA-935 / AF2122/97) GN=mntH PE=3 SV=2	0	8.33674	6.14035	3	4	3	1	684	72.787	9.13	8.34718	3
FALSE	High	Master Protein	A0A083W8U4	Glycerol-3-phosphate acyltransferase OS=Mycobacterium bovis GN=BOVR_08160 PE=3 SV=1	0	8.33167	6.44122	2	2	2	1	621	69.181	6.51	3.10496	2
FALSE	High	Master Protein	A0A0C7DT76	20-beta-hydroxysteroid dehydrogenase fabG3 (EC 1. 1.1.53) OS=Mycobacterium bovis GN=MBO1_01060 PE=4 SV=1	0	8.32753	19.7842	3	4	3	1	278	28.997	5.19	7.77128	3
FALSE	High	Master Protein	A0A0H3M5R7	Uncharacterized protein OS=Mycobacterium bovis (strain BCG / Pasteur 1173P2) GN=BCG_1865 PE=4 SV=1	0	8.32188	13.3333	3	4	3	1	225	24.005	5.87	4.61013	3
FALSE	High	Master Protein	P0A655	Nucleoid-associated protein Mb3743c OS=Mycobacterium bovis (strain ATCC BAA-935 / AF2122/97) GN=Mb3743c PE=3 SV=1	0	8.28665	24.0602	2	3	2	1	133	13.349	4.88	5.25973	2
FALSE	High	Master Protein	A0A0K2HV99	6,7-dimethyl-8-ribityllumazine synthase OS=Mycobacterium bovis BCG GN=ribH PE=3 SV=1	0	8.26926	27.5	3	4	3	1	160	16.361	5.49	9.69502	3
FALSE	High	Master Protein	A1KKF3	Proteasome subunit beta OS=Mycobacterium bovis (strain BCG / Pasteur 1173P2) GN=prcB PE=3 SV=1	0	8.25827	15.1203	2	2	2	1	291	30.286	4.83	4.90854	2
FALSE	High	Master Protein	A0A0K2HY89	Folylpolyglutamate synthase FolC OS=Mycobacterium bovis BCG GN=RN06_2992 PE=4 SV=1	0	8.23779	5.74949	2	2	2	1	487	50.748	5.11	5.06408	2
FALSE	High	Master Protein	A0A0K2HWF2	Uncharacterized protein OS=Mycobacterium bovis BCG GN=RN06_2309 PE=4 SV=1	0	8.23287	22.7092	3	3	3	1	251	27.223	9.01	4.01264	3
FALSE	High	Master Protein	A0A0K2HTQ5	50S ribosomal protein L2 OS=Mycobacterium bovis BCG GN=rplB PE=3 SV=1	0	8.22833	28.2143	4	5	4	1	280	30.558	11.39	2.88572	4
FALSE	High	Master Protein	A0A083VS35	UDP-glucose 4-epimerase OS=Mycobacterium bovis GN=BOVR_18910 PE=4 SV=1	0	8.16751	27.3885	5	5	5	1	314	33.561	6.19	1.7898	5
FALSE	High	Master Protein	A0A0U3NBE0	Uncharacterized protein OS=Mycobacterium bovis GN=BOVR_01195 PE=4 SV=1	0	8.1494	17.1362	4	4	4	1	426	46.14	5.07	7.03738	4
FALSE	High	Master Protein	A0A083W933	50S ribosomal protein L20 OS=Mycobacterium bovis GN=rplT PE=3 SV=1	0	8.09569	27.907	2	2	2	1	129	14.518	11.09	5.64669	2
FALSE	High	Master Protein	A0A0H3P618	Uncharacterized protein OS=Mycobacterium bovis (strain ATCC BAA-935 / AF2122/97) GN=Mb1658c PE=4 SV=1	0	8.0859	21.7687	2	2	2	1	147	16.62	5.91	5.19113	2
FALSE	High	Master Protein	A0A0H3M795	Probable aminopeptidase N pepN OS=Mycobacterium bovis (strain BCG / Pasteur 1173P2) GN=pepN PE=4 SV=1	0	8.07887	8.82695	4	4	4	1	861	94.244	5.07	6.69333	4
FALSE	High	Master Protein	A0A0K2HUI4	1D-myo-inositol 2-acetamido-2-deoxy-alpha-D-glucopyranoside deacetylase OS=Mycobacterium bovis BCG GN=mshB PE=3 SV=1	0	8.06646	10.8911	2	3	2	1	303	31.723	5.45	4.72065	2
FALSE	High	Master Protein	A0A0C7DFL0	Hydrolase, alpha/beta hydrolase fold family (Prob able epoxide hydrolase EphC (Epoxide hydratase)) OS=Mycobacterium bovis GN=MBO1_02345 PE=4 SV=1	0	8.06278	18.6709	3	3	3	1	316	34.574	8.12	4.4545	3
FALSE	High	Master Protein	A0A0C7DSQ9	Methoxy mycolic acid synthase 1 mmaA1 OS=Mycobacterium bovis GN=MBO1_00475 PE=4 SV=1	0	8.05432	15.2027	3	3	2	1	296	34.332	5.2	4.38638	3
FALSE	High	Master Protein	A0A083W0T0	3-methyl-2-oxobutanoate dehydrogenase subunit alp ha (Branched-chain alpha-ketoacid dehydrogenas e E1 component subunit alpha) (BCKADH E1-alpha) OS=Mycobacterium bovis GN=BOVR_12960 PE=4 SV=1	0	7.98024	6.81199	2	2	2	1	367	40.59	5.29	5.12853	2
FALSE	High	Master Protein	A0A0H3MAE8	Uncharacterized protein OS=Mycobacterium bovis (strain BCG / Pasteur 1173P2) GN=BCG_1548c PE=4 SV=1	0	7.96936	9.59752	2	2	2	1	323	33.478	5.34	4.84735	2
FALSE	High	Master Protein	A0A0H3M8R2	Hypothetical alanine and valine rich protein OS=Mycobacterium bovis (strain BCG / Pasteur 1173P2) GN=BCG_3115 PE=4 SV=1	0	7.93443	18.6441	3	3	3	1	295	32.251	8.16	4.92139	3
FALSE	High	Master Protein	A0A083WEG1	Acyl-CoA synthetase OS=Mycobacterium bovis GN=BOVR_06310 PE=4 SV=1	0	7.91759	14.5329	4	4	4	1	578	62.718	5.4	6.39541	4
FALSE	High	Master Protein	A0A0H3P8L2	2-dehydropantoate 2-reductase OS=Mycobacterium bovis (strain ATCC BAA-935 / AF2122/97) GN=Mb2603 PE=3 SV=1	0	7.90421	22.8261	3	5	3	1	276	29.393	7.08	5.79983	3
FALSE	High	Master Protein	A0A0D1Q307	Chromosomal replication initiator protein DnaA OS=Mycobacterium bovis GN=dnaA PE=3 SV=1	0	7.88214	12.426	4	4	4	1	507	56.551	5.71	3.84535	4
FALSE	High	Master Protein	A0A083W1V8	Lysophospholipase OS=Mycobacterium bovis GN=BOVR_12525 PE=4 SV=1	0	7.83776	14.9798	2	2	2	1	247	27.208	9.07	5.60815	2
FALSE	High	Master Protein	P64876	Putative F420H(2)-dependent quinone reductase Mb1584 OS=Mycobacterium bovis (strain ATCC BAA-935 / AF2122/97) GN=Mb1584 PE=3 SV=1	0	7.79676	22.973	2	2	2	1	148	16.337	8.34	4.88922	2
FALSE	High	Master Protein	A0A0K2HSW5	S-adenosyl-L-methionine-dependent methyltransferase OS=Mycobacterium bovis BCG GN=RN06_0897 PE=3 SV=1	0	7.73459	15.7233	4	4	4	1	318	34.929	5.08	5.70484	4
FALSE	High	Master Protein	A0A0H3MG08	Uncharacterized protein OS=Mycobacterium bovis (strain BCG / Pasteur 1173P2) GN=BCG_2653c PE=4 SV=1	0	7.72291	42.6573	3	3	3	1	143	15.508	5.14	4.72148	3
FALSE	High	Master Protein	A0A0H3MCP9	Probable oxidoreductase OS=Mycobacterium bovis (strain BCG / Pasteur 1173P2) GN=BCG_1422 PE=4 SV=1	0	7.71521	11.7647	3	3	3	1	340	37.228	6.86	7.76073	3
FALSE	High	Master Protein	A0A0H3MDH4	Possible chalcone synthase pks10 OS=Mycobacterium bovis (strain BCG / Pasteur 1173P2) GN=pks10 PE=4 SV=1	0	7.70624	12.7479	3	3	3	1	353	37.122	5.4	6.94978	3
FALSE	High	Master Protein	A0A0K2HS11	Superoxide dismutase [Cu-Zn] OS=Mycobacterium bovis BCG GN=RN06_0536 PE=3 SV=1	0	7.66225	17.9167	2	3	2	1	240	23.83	6.44	2.89687	2
FALSE	High	Master Protein	A0A083WG23	50S ribosomal protein L14 OS=Mycobacterium bovis GN=rplN PE=3 SV=1	0	7.63348	30.3279	3	3	3	1	122	13.419	10.13	4.78921	3
FALSE	High	Master Protein	A0A0H3M5B7	Possible 23S rRNA methyltransferase tsnR OS=Mycobacterium bovis (strain BCG / Pasteur 1173P2) GN=tsnR PE=3 SV=1	0	7.62406	19.2308	3	3	3	1	260	26.847	6.95	8.02539	3
FALSE	High	Master Protein	A0A083VVJ4	Acyl-CoA dehydrogenase (Probable acyl-CoA dehydro genase FadE24) OS=Mycobacterium bovis GN=BOVR_16250 PE=3 SV=1	0	7.59003	10.8974	3	3	3	1	468	49.616	6.06	4.54595	3
FALSE	High	Master Protein	A0A0M4N3I7	Ribosome-recycling factor OS=Mycobacterium bovis GN=frr PE=3 SV=1	0	7.56844	12.4324	2	2	2	1	185	20.831	5.96	5.33349	2
FALSE	High	Master Protein	A0A0C7DND0	5-formyltetrahydrofolate cyclo-ligase OS=Mycobacterium bovis GN=MBO1_02105 PE=3 SV=1	0	7.50205	14.9378	2	2	2	1	241	25.984	9.25	2.28184	2
FALSE	High	Master Protein	A0A0C7DJK7	Uncharacterized protein OS=Mycobacterium bovis GN=MBO1_03277 PE=4 SV=1	0	7.49555	16.5049	2	2	2	1	309	31.479	8.87	4.83426	2
FALSE	High	Master Protein	P0A5R1	Pantothenate synthetase OS=Mycobacterium bovis (strain ATCC BAA-935 / AF2122/97) GN=panC PE=3 SV=1	0	7.47796	25.5663	3	3	3	1	309	32.657	6.09	5.44066	3
FALSE	High	Master Protein	A0A0C7DE15	Uncharacterized protein OS=Mycobacterium bovis GN=MBO1_02013 PE=4 SV=1	0	7.4585	33.5227	3	4	3	1	176	19.029	9.66	7.27686	3
FALSE	High	Master Protein	A0A0H3M9B8	Ribose-phosphate pyrophosphokinase OS=Mycobacterium bovis (strain BCG / Pasteur 1173P2) GN=prsA PE=3 SV=1	0	7.4383	8.58896	2	2	2	1	326	35.455	6.54	4.07699	2
FALSE	High	Master Protein	A0A083VPX4	N-acetylmuramoyl-L-alanine amidase OS=Mycobacterium bovis GN=BOVR_20340 PE=4 SV=1	0	7.41531	12.3153	3	3	3	1	406	43.884	6.86	2.127	3
FALSE	High	Master Protein	A0A0H3M8I0	Chaperone protein DnaJ OS=Mycobacterium bovis (strain BCG / Pasteur 1173P2) GN=dnaJ2 PE=3 SV=1	0	7.41101	19.8953	4	4	4	1	382	40.464	6.68	4.84046	4
FALSE	High	Master Protein	A0A0C7DE94	Transcriptional regulator OS=Mycobacterium bovis GN=MBO1_01931 PE=4 SV=1	0	7.40226	17.9104	2	2	2	1	268	29.26	5.72	3.24607	2
FALSE	High	Master Protein	C1ALD8	Phosphoribosylformylglycinamidine synthase subunit PurL OS=Mycobacterium bovis (strain BCG / Tokyo 172 / ATCC 35737 / TMC 1019) GN=purL PE=3 SV=2	0	7.39316	8.22454	3	4	3	1	766	80.751	5	4.4645	3
FALSE	High	Master Protein	A0A0H3MCS9	Probable DNA/pantothenate metabolism flavoprotein homolog dfp OS=Mycobacterium bovis (strain BCG / Pasteur 1173P2) GN=dfp PE=4 SV=1	0	7.38147	12.6794	3	3	3	1	418	43.55	7.17	4.4108	3
FALSE	High	Master Protein	A0A0K2HZV9	2-hydroxyhepta-2,4-diene-1,7-dioate isomerase OS=Mycobacterium bovis BCG GN=RN06_3624 PE=4 SV=1	0	7.36581	19.2171	2	2	2	1	281	29.71	5.63	3.7343	2
FALSE	High	Master Protein	A0A0H4XRU1	N utilization substance protein B homolog OS=Mycobacterium bovis GN=nusB PE=3 SV=1	0	7.36269	24.359	2	3	2	1	156	16.774	6.8	5.08392	2
FALSE	High	Master Protein	A1KGI7	50S ribosomal protein L22 OS=Mycobacterium bovis (strain BCG / Pasteur 1173P2) GN=rplV PE=3 SV=1	0	7.33843	23.8579	3	3	3	1	197	20.368	11.74	5.07316	3
FALSE	High	Master Protein	A0A0H3M0U8	Possible mce-family lipoprotein lprK (MCE-family lipoprotein mce1E) OS=Mycobacterium bovis (strain BCG / Pasteur 1173P2) GN=lprK PE=4 SV=1	0	7.3343	13.0769	3	3	3	1	390	42.213	8.24	1.65924	3
FALSE	High	Master Protein	A0A0H3P1U9	Conserved protein OS=Mycobacterium bovis (strain ATCC BAA-935 / AF2122/97) GN=Mb0475 PE=4 SV=1	0	7.28986	15.5303	3	3	3	1	264	30.166	6.05	5.14449	3
FALSE	High	Master Protein	A0A0H3M5A8	Bifunctional apolipoprotein N-acyltransferase/polyprenol monophosphomannose synthase OS=Mycobacterium bovis (strain BCG / Pasteur 1173P2) GN=lnt PE=1 SV=1	0	7.2783	7.89474	3	3	3	1	874	93.766	8.13	4.18815	3
FALSE	High	Master Protein	A0A0H3MD60	Conserved hypothetical alanine and glycine and valine rich protein OS=Mycobacterium bovis (strain BCG / Pasteur 1173P2) GN=BCG_2709c PE=4 SV=1	0	7.26328	10.4247	2	2	2	1	259	27.199	5.53	5.31718	2
FALSE	High	Master Protein	A0A0C7DRQ2	CDP-diacylglycerol pyrophosphatase OS=Mycobacterium bovis GN=cdh PE=3 SV=1	0	7.23918	18.7943	3	4	3	1	282	30.767	8.43	6.51469	3
FALSE	High	Master Protein	A0A0K2I3S0	Uncharacterized protein OS=Mycobacterium bovis BCG GN=RN06_4777 PE=4 SV=1	0	7.19843	16.0428	2	2	2	1	187	20.576	4.42	5.57287	2
FALSE	High	Master Protein	A0A0H3P6S0	Uncharacterized protein OS=Mycobacterium bovis (strain ATCC BAA-935 / AF2122/97) GN=Mb3893 PE=4 SV=1	0	7.18627	9.43878	2	2	2	1	392	41.062	8.21	4.25257	2
FALSE	High	Master Protein	A0A0H3M4V5	Probable inosine-5'-monophosphate dehydrogenase guaB1 OS=Mycobacterium bovis (strain BCG / Pasteur 1173P2) GN=guaB1 PE=4 SV=1	0	7.17936	10.6472	3	3	3	1	479	49.934	6.35	4.62884	3
FALSE	High	Master Protein	A0A0K2HU33	Fructose-1,6-bisphosphatase OS=Mycobacterium bovis BCG GN=RN06_1380 PE=3 SV=1	0	7.14487	9.66851	2	2	2	1	362	38.06	5.47	4.11828	2
FALSE	High	Master Protein	A0A0C7DFQ0	Uncharacterized protein OS=Mycobacterium bovis GN=MBO1_02380 PE=4 SV=1	0	7.13418	22.1429	2	2	2	1	140	14.154	8.16	2.88105	2
FALSE	High	Master Protein	C1AQ16	Pup--protein ligase OS=Mycobacterium bovis (strain BCG / Tokyo 172 / ATCC 35737 / TMC 1019) GN=pafA PE=3 SV=1	0	7.1315	10.3982	3	3	3	1	452	51.352	6.73	4.8308	3
FALSE	High	Master Protein	A0A0Y1BT87	S-adenosylmethionine-dependent methyltransferase OS=Mycobacterium bovis BCG GN=RN06_0890 PE=3 SV=1	0	7.11478	11.2745	3	4	2	1	408	45.582	6.16	5.66605	3
FALSE	High	Master Protein	A0A120IQN5	Serine protease OS=Mycobacterium bovis BCG GN=RN06_4478 PE=4 SV=1	0	7.11362	14.2232	3	3	3	1	457	47.335	7.11	5.35598	3
FALSE	High	Master Protein	A0A0K2I0T5	ATP-dependent 6-phosphofructokinase OS=Mycobacterium bovis BCG GN=pfkA PE=3 SV=1	0	7.10182	18.0758	3	5	3	1	343	36.857	6.67	6.24793	3
FALSE	High	Master Protein	A0A0H3M5C1	Phenylalanine--tRNA ligase beta subunit OS=Mycobacterium bovis (strain BCG / Pasteur 1173P2) GN=pheT PE=3 SV=1	0	7.04999	8.30325	3	3	3	1	831	88.347	5.33	4.93433	3
FALSE	High	Master Protein	A0A0H3M9V9	Probable transcriptional regulatory protein (Possibly tetR-family) OS=Mycobacterium bovis (strain BCG / Pasteur 1173P2) GN=BCG_0180 PE=4 SV=1	0	6.99618	12.1429	2	2	2	1	280	30.624	8.47	2.20256	2
FALSE	High	Master Protein	A0A0K2I1X3	Iron-regulated H-NS-like protein OS=Mycobacterium bovis BCG GN=RN06_4398 PE=4 SV=1	0	6.99504	37.5	3	4	3	1	112	12.091	10.08	7.25602	3
FALSE	High	Master Protein	A0A0C7DUG5	Uncharacterized protein OS=Mycobacterium bovis GN=MBO1_03890 PE=4 SV=1	0	6.98946	13.0952	2	3	2	1	168	17.81	5.5	5.18027	2
FALSE	High	Master Protein	C1AQ25	Proteasome subunit alpha OS=Mycobacterium bovis (strain BCG / Tokyo 172 / ATCC 35737 / TMC 1019) GN=prcA PE=3 SV=1	0	6.98368	25.4032	3	3	3	1	248	26.707	5.24	4.25288	3
FALSE	High	Master Protein	A0A0C7DI04	Uncharacterized protein OS=Mycobacterium bovis GN=MBO1_03354 PE=4 SV=1	0	6.96323	15.7895	2	2	2	1	285	30.698	10.05	2.17045	2
FALSE	High	Master Protein	A0A0H3M827	Uncharacterized protein OS=Mycobacterium bovis (strain BCG / Pasteur 1173P2) GN=BCG_2840c PE=4 SV=1	0	6.95935	14.4068	2	2	2	1	236	25.757	7.49	2.70964	2
FALSE	High	Master Protein	A0A0H3P7N5	Molybdopterin synthase sulfur carrier subunit OS=Mycobacterium bovis (strain ATCC BAA-935 / AF2122/97) GN=moaX PE=3 SV=1	0	6.95076	20.8145	2	2	2	1	221	24.035	5.2	5.89865	2
FALSE	High	Master Protein	P59956	Transketolase OS=Mycobacterium bovis (strain ATCC BAA-935 / AF2122/97) GN=tkt PE=3 SV=1	0	6.93776	10.7143	4	4	4	1	700	75.494	5.12	6.3822	4
FALSE	High	Master Protein	A0A0H3M5Z7	Uncharacterized protein OS=Mycobacterium bovis (strain BCG / Pasteur 1173P2) GN=BCG_2321 PE=4 SV=1	0	6.9227	12.3543	3	3	3	1	429	46.153	5.81	5.03973	3
FALSE	High	Master Protein	A0A0H4Y740	Glycerol-3-phosphate dehydrogenase [NAD(P)+] OS=Mycobacterium bovis GN=gpsA PE=3 SV=1	0	6.90761	18.8034	3	3	3	1	351	37.178	7.53	4.54895	3
FALSE	High	Master Protein	A0A0C7DFC3	Diacylglycerol O-acyltransferase OS=Mycobacterium bovis GN=MBO1_01658 PE=3 SV=1	0	6.88251	8.76404	2	2	2	1	445	47.707	7.83	2.87391	2
FALSE	High	Master Protein	A0A0C7DBN5	Uncharacterized protein OS=Mycobacterium bovis GN=MBO1_00844 PE=4 SV=1	0	6.87191	23.2082	3	4	3	1	293	31.053	6.09	4.38315	3
FALSE	High	Master Protein	A0A083WCQ6	Nucleotide-binding protein BOVR_07540 OS=Mycobacterium bovis GN=BOVR_07540 PE=3 SV=1	0	6.86362	7.97342	2	3	2	1	301	32.892	6.98	1.87239	2
FALSE	High	Master Protein	A0A0K2HRD1	Dihydroxy-acid dehydratase OS=Mycobacterium bovis BCG GN=ilvD PE=3 SV=1	0	6.84672	17.7391	4	4	4	1	575	59.314	5.26	4.42811	4
FALSE	High	Master Protein	P63381	UvrABC system protein A OS=Mycobacterium bovis (strain ATCC BAA-935 / AF2122/97) GN=uvrA PE=3 SV=1	0	6.83964	3.08642	2	2	2	1	972	106.066	6.89	4.67739	2
FALSE	High	Master Protein	A0A0K2I274	tRNA threonylcarbamoyladenosine biosynthesis protein OS=Mycobacterium bovis BCG GN=RN06_4188 PE=4 SV=1	0	6.81227	18.4524	2	2	2	1	168	18.202	6.7	4.57742	2
FALSE	High	Master Protein	A0A0C7DEP1	Enoyl-CoA hydratase echA15 OS=Mycobacterium bovis GN=MBO1_01328 PE=3 SV=1	0	6.80554	22.0497	4	4	4	1	322	34.639	6.68	2.1742	4
FALSE	High	Master Protein	A0A0H3M7N3	Probable bifunctional protein, CobI-CobJ fusion protein: S-adenosyl-L-methionine-precorrin-2 methyl transferase + precorrin-3 methylase OS=Mycobacterium bovis (strain BCG / Pasteur 1173P2) GN=cobI PE=3 SV=1	0	6.79221	13.5827	4	4	4	1	508	53.878	6.73	4.11972	4
FALSE	High	Master Protein	A0A0C7DA27	Porphobilinogen deaminase OS=Mycobacterium bovis GN=hemC PE=3 SV=1	0	6.7797	18.9103	3	3	3	1	312	32.226	5.03	6.64562	3
FALSE	High	Master Protein	A0A0H3M6I8	UDP-N-acetylmuramoyl-tripeptide--D-alanyl-D-alanine ligase OS=Mycobacterium bovis (strain BCG / Pasteur 1173P2) GN=murF PE=3 SV=1	0	6.77941	13.1373	3	3	3	1	510	51.601	5.81	2.4412	3
FALSE	High	Master Protein	A0A0C7DGY2	Conserved protein OS=Mycobacterium bovis GN=MBO1_02912 PE=4 SV=1	0	6.72792	5.96491	2	2	2	1	285	30.666	7.58	3.39777	2
FALSE	High	Master Protein	A0A0C7DAN1	Probable conserved membrane protein OS=Mycobacterium bovis GN=MBO1_00654 PE=4 SV=1	0	6.70464	18.75	2	2	2	1	336	35.416	7.01	2.02154	2
FALSE	High	Master Protein	A0A0C7DSG0	Transcriptional regulator, ArsR family OS=Mycobacterium bovis GN=MBO1_00917 PE=4 SV=1	0	6.68591	45.1852	3	3	3	1	135	14.379	6.87	1.78088	3
FALSE	High	Master Protein	A0A083WCN5	Lipase OS=Mycobacterium bovis GN=BOVR_07435 PE=4 SV=1	0	6.68083	10.9375	2	2	2	1	320	34.031	5.05	5.86279	2
FALSE	High	Master Protein	C1AKF6	Deoxyribose-phosphate aldolase OS=Mycobacterium bovis (strain BCG / Tokyo 172 / ATCC 35737 / TMC 1019) GN=deoC PE=3 SV=1	0	6.67731	16.9643	3	3	3	1	224	22.054	5.8	6.85713	3
FALSE	High	Master Protein	A0A083WF59	Uncharacterized protein OS=Mycobacterium bovis GN=MBO1_02053 PE=4 SV=1	0	6.66409	22.179	3	4	3	1	257	27.153	9.96	2.08496	3
FALSE	High	Master Protein	A0A0H3P6W7	Diacylglycerol kinase OS=Mycobacterium bovis (strain ATCC BAA-935 / AF2122/97) GN=Mb2276 PE=4 SV=1	0	6.58038	26.8608	3	3	3	1	309	32.785	6.67	4.89671	3
FALSE	High	Master Protein	A0A083VTW4	Nitroreductase OS=Mycobacterium bovis GN=BOVR_17660 PE=4 SV=1	0	6.57295	35.0467	4	5	4	1	214	23.718	6.39	4.60455	4
FALSE	High	Master Protein	A0A0C7DMF1	Transcriptional regulator, TetR family OS=Mycobacterium bovis GN=MBO1_02590 PE=4 SV=1	0	6.53975	18.1435	3	3	3	1	237	25.952	5.5	5.25753	3
FALSE	High	Master Protein	C1AQ55	Dihydroorotate dehydrogenase (quinone) OS=Mycobacterium bovis (strain BCG / Tokyo 172 / ATCC 35737 / TMC 1019) GN=pyrD PE=3 SV=1	0	6.51743	13.1653	3	3	3	1	357	37.922	9.73	4.70755	3
FALSE	High	Master Protein	A0A0C7DMI5	N5,N10-methylenetetrahydromethanopterin reductase OS=Mycobacterium bovis GN=MBO1_02611 PE=4 SV=1	0	6.49493	9.67742	2	2	2	1	279	30.392	5.85	5.55164	2
FALSE	High	Master Protein	A0A0H3MB40	Uncharacterized protein OS=Mycobacterium bovis (strain BCG / Pasteur 1173P2) GN=BCG_1829 PE=4 SV=1	0	6.47941	10.5911	2	2	2	1	406	44.151	6.89	2.82094	2
FALSE	High	Master Protein	A0A0K2HU71	Oxidoreductase OS=Mycobacterium bovis BCG GN=RN06_1433 PE=4 SV=1	0	6.44634	24	3	3	3	1	250	25.772	6.6	2.00737	3
FALSE	High	Master Protein	A0A0C7DFT7	Uncharacterized protein Rv1332/MT1374 OS=Mycobacterium bovis GN=MBO1_02449 PE=4 SV=1	0	6.43605	34.8624	3	3	3	1	218	24.039	5.5	2.06646	3
FALSE	High	Master Protein	A0A0K2HUY0	Homoserine kinase OS=Mycobacterium bovis BCG GN=thrB PE=3 SV=1	0	6.43228	17.4051	3	3	3	1	316	32.327	5.11	4.98547	3
FALSE	High	Master Protein	A0A083WDA5	UDP-glucose pyrophosphorylase OS=Mycobacterium bovis GN=BOVR_05255 PE=4 SV=1	0	6.43041	9.47712	2	2	2	1	306	32.386	5.12	2.06404	2
FALSE	High	Master Protein	P67548	Phosphatidylserine decarboxylase proenzyme OS=Mycobacterium bovis (strain ATCC BAA-935 / AF2122/97) GN=psd PE=3 SV=1	0	6.42689	23.3766	2	2	2	1	231	24.245	9.26	3.47816	2
FALSE	High	Master Protein	A0A0C7DLB1	Uncharacterized protein OS=Mycobacterium bovis GN=MBO_300701 PE=4 SV=1	0	6.42624	14.5455	2	2	2	1	275	30.224	8.76	5.45484	2
FALSE	High	Master Protein	A0A0H4Y7C2	50S ribosomal protein L23 OS=Mycobacterium bovis GN=rplW PE=3 SV=1	0	6.40065	54	3	3	3	1	100	10.951	10.48	4.62992	3
FALSE	High	Master Protein	A0A0H3M4H7	Threonine synthase OS=Mycobacterium bovis (strain BCG / Pasteur 1173P2) GN=thrC PE=3 SV=1	0	6.39177	24.1667	3	3	3	1	360	37.298	6.16	8.20466	3
FALSE	High	Master Protein	A0A083WLP9	Possible exported protein OS=Mycobacterium bovis GN=BOVR_02710 PE=4 SV=1	0	6.30166	21.2121	2	2	2	1	231	24.62	5.08	3.14053	2
FALSE	High	Master Protein	A0A083VW80	Conserved alanine valine rich protein OS=Mycobacterium bovis GN=MBO1_03055 PE=4 SV=1	0	6.29358	10.8108	2	2	2	1	407	42.452	8.68	4.55072	2
FALSE	High	Master Protein	A0A0C7DPT1	Uncharacterized protein OS=Mycobacterium bovis GN=MBO1_01721 PE=4 SV=1	0	6.28011	26.8041	2	2	2	1	97	10.267	10.59	5.53464	2
FALSE	High	Master Protein	A0A0H3M744	Uncharacterized protein OS=Mycobacterium bovis (strain BCG / Pasteur 1173P2) GN=BCG_1907c PE=4 SV=1	0	6.27203	22.4806	2	2	2	1	129	14.672	11.18	3.13071	2
FALSE	High	Master Protein	A0A0H3M4A4	Imidazole glycerol phosphate synthase subunit HisH OS=Mycobacterium bovis (strain BCG / Pasteur 1173P2) GN=hisH PE=3 SV=1	0	6.25717	16.5049	2	2	2	1	206	21.432	5.53	3.14606	2
FALSE	High	Master Protein	A0A0H3P570	Probable short-chain type dehydrogenase/reductase OS=Mycobacterium bovis (strain ATCC BAA-935 / AF2122/97) GN=Mb0970 PE=3 SV=1	0	6.24912	17.7866	3	3	3	1	253	27.023	9.77	5.00431	3
FALSE	High	Master Protein	A1KPT5	Type III pantothenate kinase OS=Mycobacterium bovis (strain BCG / Pasteur 1173P2) GN=coaX PE=3 SV=1	0	6.23886	13.9706	2	2	2	1	272	29.287	6.44	5.66368	2
FALSE	High	Master Protein	A0A0C7DQE8	Carboxyl esterase OS=Mycobacterium bovis GN=MBO1_00476 PE=4 SV=1	0	6.2292	11.6071	2	2	2	1	336	36.747	9.85	4.92285	2
FALSE	High	Master Protein	A0A083WBE2	Histidinol-phosphate aminotransferase OS=Mycobacterium bovis GN=hisC PE=3 SV=1	0	6.22759	9.73684	3	3	3	1	380	40.556	5.44	6.59988	3
FALSE	High	Master Protein	A0A083WH64	F420-dependent glucose-6-phosphate dehydrogenase OS=Mycobacterium bovis GN=fgd PE=3 SV=1	0	6.21427	7.44048	2	2	2	1	336	36.966	5.47	2.3855	2
FALSE	High	Master Protein	A0A0H3MA26	UDP-N-acetylglucosamine 1-carboxyvinyltransferase OS=Mycobacterium bovis (strain BCG / Pasteur 1173P2) GN=murA PE=3 SV=1	0	6.20999	13.6364	2	3	2	1	418	44.035	5.54	0	2
FALSE	High	Master Protein	A0A0H3P2B8	PROBABLE DEHYDROGENASE/REDUCTASE OS=Mycobacterium bovis (strain ATCC BAA-935 / AF2122/97) GN=Mb0311 PE=4 SV=1	0	6.16965	15.894	3	3	3	1	302	32.691	8.13	4.1202	3
FALSE	High	Master Protein	A0A0K2HZN8	Acylphosphatase OS=Mycobacterium bovis BCG GN=RN06_3527 PE=3 SV=1	0	6.16896	43.0108	3	3	3	1	93	10.199	9.19	4.28732	3
FALSE	High	Master Protein	A0A0H3P4Z8	Conserved protein ssec2 OS=Mycobacterium bovis (strain ATCC BAA-935 / AF2122/97) GN=sseC2 PE=4 SV=1	0	6.16043	48	2	2	2	1	100	10.159	4.61	5.54737	2
FALSE	High	Master Protein	A0A0C7DFD1	Lipoprotein lprA OS=Mycobacterium bovis GN=MBO1_02381 PE=4 SV=1	0	6.15512	10.8949	2	2	2	1	257	26.36	5.25	4.02239	2
FALSE	High	Master Protein	A0A0H3P308	PROBABLE CONSERVED ATP-BINDING PROTEIN ABC TRANSPORTER OS=Mycobacterium bovis (strain ATCC BAA-935 / AF2122/97) GN=Mb1713c PE=4 SV=1	0	6.13882	27.451	3	3	3	1	255	27.54	7.34	2.8693	3
FALSE	High	Master Protein	A0A083VYS7	RNA polymerase sigma factor OS=Mycobacterium bovis GN=BOVR_14010 PE=3 SV=1	0	6.13368	15.4799	3	3	3	1	323	36.321	6.64	4.35271	3
FALSE	High	Master Protein	A0A0Y1BT88	Delta-aminolevulinic acid dehydratase OS=Mycobacterium bovis BCG GN=RN06_0632 PE=3 SV=1	0	6.12743	26.1398	4	4	4	1	329	34.778	4.98	4.25549	4
FALSE	High	Master Protein	A0A0H3MIA2	Probable short-chain type dehydrogenase/reductase OS=Mycobacterium bovis (strain BCG / Pasteur 1173P2) GN=BCG_3566c PE=3 SV=1	0	6.12483	15.142	3	3	3	1	317	32.733	5.16	2.01273	3
FALSE	High	Master Protein	A0A0H3P3U5	Possible transcriptional regulatory protein OS=Mycobacterium bovis (strain ATCC BAA-935 / AF2122/97) GN=Mb2282c PE=4 SV=1	0	6.10119	10.4816	2	2	2	1	353	37.49	4.74	3.22684	2
FALSE	High	Master Protein	P67488	Putative pre-16S rRNA nuclease OS=Mycobacterium bovis (strain ATCC BAA-935 / AF2122/97) GN=Mb2584c PE=3 SV=1	0	6.08988	27.0588	3	3	3	1	170	18.055	8.28	2.9169	3
FALSE	High	Master Protein	A0A0H3MF01	Probable transmembrane cytochrome C oxidase (Subunit ii) ctaC OS=Mycobacterium bovis (strain BCG / Pasteur 1173P2) GN=ctaC PE=4 SV=1	0	6.08897	10.7438	2	3	2	1	363	40.454	7.84	7.10386	2
FALSE	High	Master Protein	A0A0C7DIN5	NAD(P) transhydrogenase subunit beta OS=Mycobacterium bovis GN=MBO1_03608 PE=3 SV=1	0	6.07465	15.1579	3	3	3	1	475	48.827	6.54	3.98968	3
FALSE	High	Master Protein	A0A0H3M3F1	Acetate kinase OS=Mycobacterium bovis (strain BCG / Pasteur 1173P2) GN=ackA PE=3 SV=1	0	6.05833	16.6234	3	3	3	1	385	41.293	7.28	4.32189	3
FALSE	High	Master Protein	A0A0C7DH36	NADH pyrophosphatase OS=Mycobacterium bovis GN=nudC PE=3 SV=1	0	6.0473	16.8394	3	4	3	1	386	41.36	6.99	2.38466	3
FALSE	High	Master Protein	A0A0C7DUK1	Mur ligase family protein (Possible ligase) OS=Mycobacterium bovis GN=MBO_303105 PE=4 SV=1	0	6.03113	6.05327	2	2	2	1	413	43.369	6.76	5.42581	2
FALSE	High	Master Protein	A0A0H4Y9V5	Radical SAM protein OS=Mycobacterium bovis GN=BOVR_08740 PE=4 SV=1	0	6.01276	8.45921	2	2	2	1	331	35.447	6.24	4.23471	2
FALSE	High	Master Protein	A0A0C7DNW9	DNA-binding response regulator TrcR OS=Mycobacterium bovis GN=MBO1_02149 PE=4 SV=1	0	6.01175	19.5652	3	3	3	1	276	31.14	6.19	4.47452	3
FALSE	High	Master Protein	A0A0C7DT23	2-isopropylmalate synthase OS=Mycobacterium bovis GN=leuA PE=3 SV=1	0	6.00337	5.59006	2	2	2	1	644	70.11	5.2	5.5411	2
FALSE	High	Master Protein	A0A0H3P7K6	Gcn5-related n-acetyltransferase, phosphorylase OS=Mycobacterium bovis (strain ATCC BAA-935 / AF2122/97) GN=Mb3254c PE=4 SV=1	0	5.98281	4.43038	2	2	2	1	474	51.269	5.57	3.08999	2
FALSE	High	Master Protein	A0A0H3MBR3	Uncharacterized protein OS=Mycobacterium bovis (strain BCG / Pasteur 1173P2) GN=BCG_2116c PE=4 SV=1	0	5.97295	12.3494	2	2	2	1	332	35.279	5.87	1.92388	2
FALSE	High	Master Protein	A0A083WI08	30S ribosomal protein S10 OS=Mycobacterium bovis GN=rpsJ PE=3 SV=1	0	5.95758	31.6832	3	4	3	1	101	11.424	9.38	5.98169	3
FALSE	High	Master Protein	A0A0H3M5R1	Methylated-DNA--protein-cysteine methyltransferase OS=Mycobacterium bovis (strain BCG / Pasteur 1173P2) GN=ogt PE=3 SV=1	0	5.93887	23.0303	2	2	2	1	165	17.847	6.38	4.83148	2
FALSE	High	Master Protein	A0A083WM05	LLM class F420-dependent oxidoreductase OS=Mycobacterium bovis GN=BOVR_00240 PE=4 SV=1	0	5.92608	15.5303	3	3	3	1	264	28.506	6.52	2.11018	3
FALSE	High	Master Protein	A0A0K2HUM7	Polyprenyl-diphosphate synthase GrcC OS=Mycobacterium bovis BCG GN=RN06_1236 PE=4 SV=1	0	5.92328	11.6923	2	2	2	1	325	34.722	5.4	2.48567	2
FALSE	High	Master Protein	A0A0K2HZE9	Ribosome maturation factor RimP OS=Mycobacterium bovis BCG GN=rimP PE=3 SV=1	0	5.91078	20.2186	2	2	2	1	183	19.553	5.48	5.66124	2
FALSE	High	Master Protein	A0A0H3MA04	ATP-dependent zinc metalloprotease FtsH OS=Mycobacterium bovis (strain BCG / Pasteur 1173P2) GN=ftsH PE=3 SV=1	0	5.89437	5.92105	2	2	2	1	760	81.935	5.85	2.59652	2
FALSE	High	Master Protein	A0A0C7DH46	ATP-dependent RNA helicase DeaD (Probable ATP-dep endent RNA helicase RhlE) OS=Mycobacterium bovis GN=BOVR_16645 PE=3 SV=1	0	5.86528	8.34915	2	2	2	1	527	56.668	9.01	2.3114	2
FALSE	High	Master Protein	A0A0C7DET3	S-adenosyl-L-methionine-dependent methyltransferase OS=Mycobacterium bovis GN=MBO1_01400 PE=3 SV=1	0	5.83541	12.5	2	3	2	1	296	33.662	9.04	5.02822	2
FALSE	High	Master Protein	A0A0K2I1E3	Uncharacterized protein OS=Mycobacterium bovis BCG GN=RN06_4203 PE=4 SV=1	0	5.79287	13.2143	2	2	2	1	280	29.223	10.23	5.20778	2
FALSE	High	Master Protein	A0A0C7DV76	Uncharacterized protein OS=Mycobacterium bovis GN=MBO_303905 PE=4 SV=1	0	5.75368	20.9607	2	2	2	1	229	25.185	7.72	2.92973	2
FALSE	High	Master Protein	A0A0H3P1T5	PROBABLE TRANSCRIPTIONAL REGULATORY PROTEIN OS=Mycobacterium bovis (strain ATCC BAA-935 / AF2122/97) GN=Mb0484 PE=4 SV=1	0	5.73409	18.5714	2	2	2	1	140	15.355	5.35	5.06455	2
FALSE	High	Master Protein	A0A0K2HY33	tRNA (Adenine(58)-N(1))-methyltransferase OS=Mycobacterium bovis BCG GN=RN06_2597 PE=4 SV=1	0	5.72405	8.57143	2	3	2	1	280	30.104	8.87	5.9158	2
FALSE	High	Master Protein	A0A0C7D9A4	Transcriptional regulator, tetR-family OS=Mycobacterium bovis GN=MBO1_00118 PE=4 SV=1	0	5.6285	10.9375	2	2	2	1	256	28.7	6.42	3.16765	2
FALSE	High	Master Protein	A0A0C7DK63	Enoyl-CoA hydratase OS=Mycobacterium bovis GN=MBO1_03631 PE=3 SV=1	0	5.61822	11.9298	2	4	2	1	285	30.546	6.54	6.40573	2
FALSE	High	Master Protein	A0A0H3MFF9	Probable sulfate-binding lipoprotein subI OS=Mycobacterium bovis (strain BCG / Pasteur 1173P2) GN=subI PE=4 SV=1	0	5.5914	10.3933	2	3	2	1	356	37.395	6.8	2.84771	2
FALSE	High	Master Protein	A0A0C7DA24	Putative DNA-binding protein Rv0500A/MT0521 OS=Mycobacterium bovis GN=MBO1_00150 PE=4 SV=1	0	5.56112	32.0513	2	2	2	1	78	8.528	9.32	3.00428	2
FALSE	High	Master Protein	P65685	Uncharacterized protein Mb2073c OS=Mycobacterium bovis (strain ATCC BAA-935 / AF2122/97) GN=Mb2073c PE=3 SV=1	0	5.55169	6.79157	3	3	3	1	854	91.328	7.09	1.84043	3
FALSE	High	Master Protein	A0A0C7DD05	Uncharacterized protein OS=Mycobacterium bovis GN=MBO1_00618 PE=4 SV=1	0	5.51062	8.96057	2	2	2	1	279	30.456	9.88	4.57496	2
FALSE	High	Master Protein	A0A0H3MAZ1	Uncharacterized protein OS=Mycobacterium bovis (strain BCG / Pasteur 1173P2) GN=BCG_0788 PE=4 SV=1	0	5.50935	23.6264	2	2	2	1	182	19.136	5.53	3.96459	2
FALSE	High	Master Protein	A0A0H4XQW7	Uncharacterized protein OS=Mycobacterium bovis GN=BOVR_10795 PE=4 SV=1	0	5.50673	6.60661	2	3	2	1	333	36.217	7.3	4.32631	2
FALSE	High	Master Protein	A0A109S814	Universal stress protein OS=Mycobacterium bovis BCG GN=RN06_2446 PE=3 SV=1	0	5.49303	10.3858	2	2	2	1	337	36.182	7.61	2.73244	2
FALSE	High	Master Protein	A0A0H4XVF9	4,5-9,10-diseco-3-hydroxy-5,9, 17-trioxoandrosta-1(10),2-diene-4-oate hydrolase OS=Mycobacterium bovis GN=BOVR_18620 PE=4 SV=1	0	5.39904	16.1512	3	3	3	1	291	31.855	7.69	6.0809	3
FALSE	High	Master Protein	A0A0H3MJE7	Putative ferredoxin-dependent glutamate synthase [NADPH] (Large subunit) gltB OS=Mycobacterium bovis (strain BCG / Pasteur 1173P2) GN=gltB PE=4 SV=1	0	5.39237	4.91159	3	4	3	1	1527	165.84	5.95	0	3
FALSE	High	Master Protein	Q7VEP8	UDP-N-acetylglucosamine--N-acetylmuramyl-(pentapeptide) pyrophosphoryl-undecaprenol N-acetylglucosamine transferase OS=Mycobacterium bovis (strain ATCC BAA-935 / AF2122/97) GN=murG PE=3 SV=1	0	5.38477	9.7561	2	3	2	1	410	41.832	10.02	8.22298	2
FALSE	High	Master Protein	A0A0H3MBC7	Probable lignin peroxidase lipJ OS=Mycobacterium bovis (strain BCG / Pasteur 1173P2) GN=lipJ PE=4 SV=1	0	5.34326	14.9351	4	4	4	1	462	49.703	5.67	3.82055	4
FALSE	High	Master Protein	A0A0C7DGF8	Non-homologous end joining protein Ku OS=Mycobacterium bovis GN=ku PE=3 SV=1	0	5.33966	15.8076	2	2	2	1	291	33.004	5.02	2.22523	2
FALSE	High	Master Protein	A0A0C7DBJ4	Enoyl-CoA hydratase echA19 OS=Mycobacterium bovis GN=MBO1_00701 PE=4 SV=1	0	5.33121	9.93377	2	3	2	1	302	32.405	7.68	1.62639	2
FALSE	High	Master Protein	A0A0H3MA31	Probable acetolactate synthase (Small subunit) ilvN OS=Mycobacterium bovis (strain BCG / Pasteur 1173P2) GN=ilvN PE=4 SV=1	0	5.28376	22.0238	2	2	2	1	168	18.188	8.16	2.83811	2
FALSE	High	Master Protein	A0A0H3M6R4	4-aminobutyrate aminotransferase gabT OS=Mycobacterium bovis (strain BCG / Pasteur 1173P2) GN=gabT PE=3 SV=1	0	5.28041	10.6904	2	2	2	1	449	46.783	5.59	2.87962	2
FALSE	High	Master Protein	A0A0H3MET3	Alanine racemase OS=Mycobacterium bovis (strain BCG / Pasteur 1173P2) GN=alr PE=3 SV=1	0	5.27348	10.049	2	2	2	1	408	43.36	6.54	4.37726	2
FALSE	High	Master Protein	P0A5U5	Protein RecA OS=Mycobacterium bovis (strain ATCC BAA-935 / AF2122/97) GN=recA PE=3 SV=1	0	5.25623	4.17722	2	2	2	1	790	85.336	6.43	4.57724	2
FALSE	High	Master Protein	A0A0H3MA90	Probable protease OS=Mycobacterium bovis (strain BCG / Pasteur 1173P2) GN=BCG_0331 PE=4 SV=1	0	5.24905	11.2798	2	4	2	1	461	46.099	5.54	2.19471	2
FALSE	High	Master Protein	A0A0H3MAK0	Probable conserved membrane protein OS=Mycobacterium bovis (strain BCG / Pasteur 1173P2) GN=BCG_0520c PE=4 SV=1	0	5.24529	9.1954	2	2	2	1	348	37.025	9.26	4.89882	2
FALSE	High	Master Protein	A0A0C7DH92	Uncharacterized protein OS=Mycobacterium bovis GN=MBO1_03109 PE=4 SV=1	0	5.10758	21.3793	2	2	2	1	145	15.567	9.52	2.43342	2
FALSE	High	Master Protein	A0A0Y1BI00	Penicillin-binding protein PbpA OS=Mycobacterium bovis BCG GN=RN06_0020 PE=4 SV=1	0	5.09536	7.12831	2	2	2	1	491	51.544	8.4	4.2531	2
FALSE	High	Master Protein	A0A0K2HVV9	CTP synthase OS=Mycobacterium bovis BCG GN=pyrG PE=3 SV=1	0	5.08706	10.5802	3	3	3	1	586	63.596	5.68	6.49425	3
FALSE	High	Master Protein	A1KG30	o-succinylbenzoate synthase OS=Mycobacterium bovis (strain BCG / Pasteur 1173P2) GN=menC PE=3 SV=1	0	5.08453	11.9632	2	3	2	1	326	33.954	4.97	6.93024	2
FALSE	High	Master Protein	A0A0C7DHU7	Penicillin-binding protein OS=Mycobacterium bovis GN=BOVR_00270 PE=4 SV=1	0	5.08166	4.25273	2	2	2	1	823	86.213	6	4.27737	2
FALSE	High	Master Protein	A0A0H3P3S2	Uncharacterized protein OS=Mycobacterium bovis (strain ATCC BAA-935 / AF2122/97) GN=Mb1804 PE=4 SV=1	0	5.04226	10.2941	2	2	2	1	272	29.732	5.97	4.61089	2
FALSE	High	Master Protein	A0A0M3TP21	NADH dehydrogenase OS=Mycobacterium bovis GN=BOVR_09635 PE=4 SV=1	0	5.04213	6.91145	2	2	2	1	463	49.687	9.36	4.63487	2
FALSE	High	Master Protein	A0A083VT79	dTDP-glucose 4,6-dehydratase OS=Mycobacterium bovis GN=BOVR_18105 PE=3 SV=1	0	5.01149	10.574	2	2	2	1	331	37.535	5.66	1.98277	2
FALSE	High	Master Protein	A0A083W9A6	Cytochrome OS=Mycobacterium bovis GN=BOVR_09770 PE=3 SV=1	0	5.0086	9.58904	2	2	2	1	438	48.842	7.08	2.94491	2
FALSE	High	Master Protein	A0A0C7DJK0	PPE family protein OS=Mycobacterium bovis GN=MBO1_03898 PE=4 SV=1	0	4.99383	8.16832	2	2	2	1	404	41.288	9.76	1.90231	2
FALSE	High	Master Protein	A0A0H3MCM6	Glutamine-dependent NAD(+) synthetase nadE OS=Mycobacterium bovis (strain BCG / Pasteur 1173P2) GN=nadE PE=4 SV=1	0	4.97837	5.15464	2	2	2	1	679	74.636	5.73	2.01163	2
FALSE	High	Master Protein	A0A093MBW1	Secretion protein EspD OS=Mycobacterium bovis GN=BOVR_18840 PE=4 SV=1	0	4.9753	7.36842	2	2	2	1	190	20.41	4.13	1.93188	2
FALSE	High	Master Protein	A0A0K2HU30	Phosphoribosylformylglycinamidine cyclo-ligase OS=Mycobacterium bovis BCG GN=purM PE=3 SV=1	0	4.94075	6.86813	2	2	2	1	364	38.369	6.46	2.06547	2
FALSE	High	Master Protein	A0A0K2HZL8	Alanine-rich lipoprotein LppW OS=Mycobacterium bovis BCG GN=RN06_3502 PE=4 SV=1	0	4.92277	12.1019	2	2	2	1	314	33.381	5.36	2.12547	2
FALSE	High	Master Protein	Q7TTR7	Probable DNA ligase OS=Mycobacterium bovis (strain ATCC BAA-935 / AF2122/97) GN=lig PE=3 SV=1	0	4.89799	7.49507	2	2	2	1	507	53.693	9.14	3.7699	2
FALSE	High	Master Protein	A0A120IQL6	HTH-type transcriptional regulator KstR OS=Mycobacterium bovis BCG GN=RN06_4371 PE=4 SV=1	0	4.88625	12.7273	2	2	2	1	220	24.035	9.26	1.91489	2
FALSE	High	Master Protein	A0A083WCJ5	Glucose-6-phosphate 1-dehydrogenase OS=Mycobacterium bovis GN=zwf PE=3 SV=1	0	4.88059	8.94942	3	3	3	1	514	57.307	5.76	0	3
FALSE	High	Master Protein	A0A083VQG6	ABC transporter ATP-binding protein OS=Mycobacterium bovis GN=BOVR_19705 PE=4 SV=1	0	4.86553	20.1465	3	3	3	1	273	29.974	6.74	4.99783	3
FALSE	High	Master Protein	A0A0H4XP45	Spermidine/putrescine ABC transporter ATP-binding protein OS=Mycobacterium bovis GN=BOVR_07745 PE=4 SV=1	0	4.81288	8.6262	2	2	2	1	313	33.738	5.16	4.49329	2
FALSE	High	Master Protein	A0A0C7DFY8	Hypothetical alanine and proline rich membrane pr otein OS=Mycobacterium bovis GN=MBO1_01846 PE=4 SV=1	0	4.75257	21.2598	2	2	2	1	254	26.844	8.53	2.46957	2
FALSE	High	Master Protein	P0A5B6	Uncharacterized HIT-like protein Mb0782c OS=Mycobacterium bovis (strain ATCC BAA-935 / AF2122/97) GN=Mb0782c PE=3 SV=1	0	4.73421	30.8271	2	2	2	1	133	14.658	6.68	5.41705	2
FALSE	High	Master Protein	A0A0K2HT17	50S ribosomal protein L18 OS=Mycobacterium bovis BCG GN=rplR PE=3 SV=1	0	4.71671	21.3115	2	2	2	1	122	13.176	11.6	4.00894	2
FALSE	High	Master Protein	A0A0H3M384	Uncharacterized protein OS=Mycobacterium bovis (strain BCG / Pasteur 1173P2) GN=BCG_1179c PE=4 SV=1	0	4.71399	8.39161	2	2	2	1	286	32.17	9.39	2.78785	2
FALSE	High	Master Protein	A0A083VX07	Probable transcriptional regulatory protein (Tran scriptional regulator) OS=Mycobacterium bovis GN=BOVR_14920 PE=4 SV=1	0	4.68001	12.6984	2	2	2	1	252	27.696	7.55	3.87446	2
FALSE	High	Master Protein	A0A120IQD8	Mannose-6-phosphate isomerase OS=Mycobacterium bovis BCG GN=RN06_3941 PE=3 SV=1	0	4.67368	9.09091	3	3	3	1	671	70.257	5	3.46176	3
FALSE	High	Master Protein	P66640	30S ribosomal protein S9 OS=Mycobacterium bovis (strain ATCC BAA-935 / AF2122/97) GN=rpsI PE=3 SV=1	0	4.66666	29.8013	2	2	2	1	151	16.426	10.67	1.744	2
FALSE	High	Master Protein	A0A083WKK9	ESX-3 secretion system protein EccC3 (ESX conserv ed component C3) (Type VII secretion system protein EccC3) (T7SS protein EccC3) OS=Mycobacterium bovis GN=MBO1_00296 PE=4 SV=1	0	4.65991	4.3609	3	4	3	1	1330	145.139	6.54	2.25138	3
FALSE	High	Master Protein	A0A083VZ54	Mycothione reductase OS=Mycobacterium bovis GN=BOVR_14760 PE=3 SV=1	0	4.64987	9.36819	2	2	2	1	459	49.914	5.69	2.20656	2
FALSE	High	Master Protein	A0A0K2HXZ2	Amidase OS=Mycobacterium bovis BCG GN=RN06_2891 PE=3 SV=1	0	4.64776	7.64463	2	2	2	1	484	50.852	7.61	2.22338	2
FALSE	High	Master Protein	C1AIV9	Putative 4-hydroxy-4-methyl-2-oxoglutarate aldolase OS=Mycobacterium bovis (strain BCG / Tokyo 172 / ATCC 35737 / TMC 1019) GN=JTY_3918 PE=3 SV=1	0	4.64566	17.1975	3	3	3	1	157	16.225	5.27	2.13476	3
FALSE	High	Master Protein	A0A0H3P6A8	Possible exported protein OS=Mycobacterium bovis (strain ATCC BAA-935 / AF2122/97) GN=Mb1792c PE=4 SV=1	0	4.63583	25.1969	2	2	2	1	127	13.479	7.61	2.30659	2
FALSE	High	Master Protein	A0A083WIB4	Adenylosuccinate lyase OS=Mycobacterium bovis GN=BOVR_04110 PE=3 SV=1	0	4.6116	13.7712	3	3	3	1	472	51.004	6.38	0	3
FALSE	High	Master Protein	P66843	Signal recognition particle receptor FtsY OS=Mycobacterium bovis (strain ATCC BAA-935 / AF2122/97) GN=ftsY PE=3 SV=1	0	4.59721	9.71564	2	2	2	1	422	44.005	5.36	4.76402	2
FALSE	High	Master Protein	A0A083W2S9	2-oxoisovalerate dehydrogenase OS=Mycobacterium bovis GN=BOVR_12955 PE=4 SV=1	0	4.59492	8.90805	2	2	2	1	348	38.07	5.35	3.09235	2
FALSE	High	Master Protein	A0A0C7DD74	DNA-binding protein OS=Mycobacterium bovis GN=MBO1_01553 PE=4 SV=1	0	4.59087	21.4286	2	3	2	1	154	16.637	8.65	0	2
FALSE	High	Master Protein	A0A0H3MAK8	Possible phosphoserine phosphatase serB1 OS=Mycobacterium bovis (strain BCG / Pasteur 1173P2) GN=serB1 PE=4 SV=1	0	4.58052	11.5282	2	3	2	1	373	39.484	8.72	4.12947	2
FALSE	High	Master Protein	A0A083WG76	ATP-binding protein OS=Mycobacterium bovis GN=BOVR_04015 PE=4 SV=1	0	4.55207	11.9588	3	3	3	1	485	52.057	7.08	2.46129	3
FALSE	High	Master Protein	A0A0C7DN59	Uncharacterized protein OS=Mycobacterium bovis GN=MBO1_02782 PE=4 SV=1	0	4.54311	10.8333	2	2	2	1	240	25.283	5.6	4.13248	2
FALSE	High	Master Protein	A0A0H3M5A5	Probable nonspecific lipid-transfer protein OS=Mycobacterium bovis (strain BCG / Pasteur 1173P2) GN=BCG_1665c PE=4 SV=1	0	4.53761	7.21393	2	2	2	1	402	42.36	6.19	3.77489	2
FALSE	High	Master Protein	A0A0Y1C3X9	Transcriptional regulator OS=Mycobacterium bovis BCG GN=RN06_0844 PE=4 SV=1	0	4.5372	11.9266	2	2	2	1	218	23.334	6.81	3.61378	2
FALSE	High	Master Protein	P0A4Z3	Shikimate kinase OS=Mycobacterium bovis (strain ATCC BAA-935 / AF2122/97) GN=aroK PE=3 SV=1	0	4.53687	15.3409	2	2	2	1	176	18.572	10.56	4.46294	2
FALSE	High	Master Protein	P65488	Probable methylmalonyl-CoA mutase large subunit OS=Mycobacterium bovis (strain ATCC BAA-935 / AF2122/97) GN=mutB PE=3 SV=1	0	4.48782	4.4	2	2	2	1	750	80.554	5.86	1.9001	2
FALSE	High	Master Protein	A0A0C7DQS4	4-hydroxy-tetrahydrodipicolinate reductase OS=Mycobacterium bovis GN=dapB PE=3 SV=1	0	4.477	12.0968	2	2	2	1	248	26.06	6.05	5.12113	2
FALSE	High	Master Protein	A0A0H3MG38	Uncharacterized protein OS=Mycobacterium bovis (strain BCG / Pasteur 1173P2) GN=BCG_2696 PE=4 SV=1	0	4.46914	24.2424	2	3	2	1	165	17.692	6.01	1.75801	2
FALSE	High	Master Protein	A1KF76	Cobyric acid synthase OS=Mycobacterium bovis (strain BCG / Pasteur 1173P2) GN=cobQ PE=3 SV=1	0	4.45466	7.28745	2	2	2	1	494	52.102	6.35	0	2
FALSE	High	Master Protein	A0A0G4DQD1	Glycerol kinase OS=Mycobacterium bovis GN=glpK PE=3 SV=1	0	4.42398	5.79151	2	2	2	1	518	55.854	5.08	3.87413	2
FALSE	High	Master Protein	A0A0H3P3N7	5-methyltetrahydrofolate--homocystein methyltransferase meth (Methionine synthase, vitamin-b12 dependent isozyme) (Ms) OS=Mycobacterium bovis (strain ATCC BAA-935 / AF2122/97) GN=metH PE=4 SV=1	0	4.36802	4.69799	2	2	2	1	1192	130.227	5.05	2.06276	2
FALSE	High	Master Protein	A0A083WN15	Putative dioxygenase Rv0097/MT0106 OS=Mycobacterium bovis GN=BOVR_00525 PE=4 SV=1	0	4.35692	9.68858	2	2	2	1	289	32.621	6.6	0	2
FALSE	High	Master Protein	A0A0C7DMB8	Probable arylsulfatase AtsB (Aryl-sulfate sulphoh ydrolase) (Sulfatase) OS=Mycobacterium bovis GN=MBO1_03139 PE=4 SV=1	0	4.35338	5.25773	3	3	3	1	970	105.644	5.4	0	3
FALSE	High	Master Protein	A0A0K2I1X4	Lysine--tRNA ligase OS=Mycobacterium bovis BCG GN=lysS PE=3 SV=1	0	4.32268	6.33663	2	2	2	1	505	55.675	5.47	3.10039	2
FALSE	High	Master Protein	A0A0H3P3A6	Uncharacterized protein OS=Mycobacterium bovis (strain ATCC BAA-935 / AF2122/97) GN=Mb1915c PE=4 SV=1	0	4.31921	23.4177	2	3	2	1	158	17.773	7.91	0	2
FALSE	High	Master Protein	P0A5V1	Riboflavin biosynthesis protein RibBA OS=Mycobacterium bovis (strain ATCC BAA-935 / AF2122/97) GN=ribBA PE=3 SV=1	0	4.30726	9.88235	3	3	3	1	425	45.988	5.78	2.42382	3
FALSE	High	Master Protein	A0A083W6U7	GTPase Der OS=Mycobacterium bovis GN=engA PE=3 SV=1	0	4.30542	11.4471	2	2	2	1	463	49.927	7.61	2.02568	2
FALSE	High	Master Protein	A1KNE2	NADH-quinone oxidoreductase subunit B OS=Mycobacterium bovis (strain BCG / Pasteur 1173P2) GN=nuoB PE=3 SV=1	0	4.30322	10.8696	2	2	2	1	184	20.205	7.81	1.88346	2
FALSE	High	Master Protein	A0A0H3P382	Probable polyketide synthase pks5 OS=Mycobacterium bovis (strain ATCC BAA-935 / AF2122/97) GN=pks5 PE=4 SV=1	0	4.29671	2.41935	2	3	2	1	2108	223.72	5.3	0	2
FALSE	High	Master Protein	P67657	5'-methylthioadenosine/S-adenosylhomocysteine nucleosidase OS=Mycobacterium bovis (strain ATCC BAA-935 / AF2122/97) GN=mtnN PE=3 SV=1	0	4.27647	15.6863	2	2	2	1	255	27.322	6.42	2.34801	2
FALSE	High	Master Protein	A0A083VRJ2	Cobyric acid synthase cobQ2 OS=Mycobacterium bovis GN=BOVR_19325 PE=4 SV=1	0	4.25439	27.234	3	3	3	1	235	24.515	5.9	3.95246	3
FALSE	High	Master Protein	A0A0C7DN81	Uncharacterized protein Rv1339/MT1380 OS=Mycobacterium bovis GN=MBO1_02456 PE=4 SV=1	0	4.25198	16.1172	2	3	2	1	273	29.136	6.28	2.16949	2
FALSE	High	Master Protein	P65721	Phosphate-specific transport system accessory protein PhoU homolog 2 OS=Mycobacterium bovis (strain ATCC BAA-935 / AF2122/97) GN=phoU2 PE=3 SV=1	0	4.24623	18.7793	2	2	2	1	213	23.499	5.44	3.97386	2
FALSE	High	Master Protein	A0A0H3P4W4	POSSIBLE HYDROLASE MUTT1 OS=Mycobacterium bovis (strain ATCC BAA-935 / AF2122/97) GN=mutT1 PE=3 SV=1	0	4.22656	9.77918	2	2	2	1	317	34.759	9.17	4.66414	2
FALSE	High	Master Protein	A0A0C7DK42	Probable O-acetylhomoserine sulfhydrylase MetC (H omocysteine synthase) (O-acetylhomoserine (Thiol)-lyase) (O AH sulfhydrylase) (O-acetyl-L-homoserine sulfhydrylase) (Tr ansulfuration enzyme family pr... OS=Mycobacterium bovis GN=MBO1_03187 PE=3 SV=1	0	4.19674	9.35412	2	3	2	1	449	47.342	5.49	4.28857	2
FALSE	High	Master Protein	C1ALT2	Glucose-6-phosphate isomerase OS=Mycobacterium bovis (strain BCG / Tokyo 172 / ATCC 35737 / TMC 1019) GN=pgi PE=3 SV=1	0	4.1746	4.33996	2	2	2	1	553	59.937	5.74	2.45694	2
FALSE	High	Master Protein	A0A0H3MBA3	Uncharacterized protein OS=Mycobacterium bovis (strain BCG / Pasteur 1173P2) GN=BCG_1911 PE=4 SV=1	0	4.1401	27.8912	2	2	2	1	147	15.969	6.57	4.44739	2
FALSE	High	Master Protein	A0A0H3MAG8	Probable response regulator OS=Mycobacterium bovis (strain BCG / Pasteur 1173P2) GN=BCG_3166 PE=4 SV=1	0	4.13869	28.5714	2	2	2	1	133	14.377	6.3	2.83142	2
FALSE	High	Master Protein	A0A0H3M1M6	Probable acyl-CoA dehydrogenase fadE3 OS=Mycobacterium bovis (strain BCG / Pasteur 1173P2) GN=fadE3 PE=3 SV=1	0	4.13547	7.47423	2	2	2	1	388	41.937	5.73	4.18298	2
FALSE	High	Master Protein	A0A0H4XT76	DNA or RNA helicase of superfamily II OS=Mycobacterium bovis GN=BOVR_06285 PE=4 SV=1	0	4.13447	3.08839	2	3	2	1	939	100.611	7.88	2.79455	2
FALSE	High	Master Protein	P64308	Non-canonical purine NTP pyrophosphatase OS=Mycobacterium bovis (strain ATCC BAA-935 / AF2122/97) GN=Mb1376 PE=3 SV=1	0	4.12159	20.5882	2	2	2	1	204	21.003	5.26	1.61829	2
FALSE	High	Master Protein	A0A0H3MBX6	Probable conserved membrane protein mmpS3 OS=Mycobacterium bovis (strain BCG / Pasteur 1173P2) GN=mmpS3 PE=4 SV=1	0	4.09878	15.7191	2	2	2	1	299	30.936	4.53	0	2
FALSE	High	Master Protein	A0A0C7DNF5	PGL/p-HBAD biosynthesis rhamnosyltransferase OS=Mycobacterium bovis GN=MBO1_02730 PE=4 SV=1	0	4.06427	7.7951	2	3	2	1	449	49.402	9.64	3.56104	2
FALSE	High	Master Protein	A0A0C7DDM4	UPF0256 protein BOVR_12515 OS=Mycobacterium bovis GN=BOVR_12515 PE=3 SV=1	0	4.05485	9.06863	2	2	2	1	408	44.39	6.42	2.61959	2
FALSE	High	Master Protein	A0A0Y1C5R1	2,3,4,5-tetrahydropyridine-2,6-dicarboxylate N-succinyltransferase OS=Mycobacterium bovis BCG GN=dapD PE=3 SV=1	0	4.04352	10.061	2	2	2	1	328	33.685	5.97	4.07009	2
FALSE	High	Master Protein	A0A0H3P2Y8	Uncharacterized protein OS=Mycobacterium bovis (strain ATCC BAA-935 / AF2122/97) GN=Mb0947c PE=4 SV=1	0	4.04109	10.7345	2	2	2	1	354	39.035	9.58	0	2
FALSE	High	Master Protein	A0A0H3MF23	Possible CoA-transferase (Beta subunit) OS=Mycobacterium bovis (strain BCG / Pasteur 1173P2) GN=BCG_3616 PE=4 SV=1	0	3.95589	20	2	2	2	1	250	27.376	6.43	2.25245	2
FALSE	High	Master Protein	A0A0C7DGB0	Uncharacterized protein OS=Mycobacterium bovis GN=MBO1_02721 PE=4 SV=1	0	3.93855	11.7409	2	2	2	1	247	27.943	8	3.91328	2
FALSE	High	Master Protein	A0A0G2Q9H9	Possible anti-sigma factor OS=Mycobacterium bovis (strain BCG / Pasteur 1173P2) GN=BCG_3249c PE=4 SV=1	0	3.92807	10.8911	2	2	2	1	101	11.283	6.67	1.93883	2
FALSE	High	Master Protein	A0A0K2HVQ8	Cob(I)yrinic acid a,c-diamide adenosyltransferase OS=Mycobacterium bovis BCG GN=RN06_1636 PE=4 SV=1	0	3.92054	26.4249	2	2	2	1	193	20.682	6.1	0	2
FALSE	High	Master Protein	A0A0H3MBJ7	Uncharacterized protein OS=Mycobacterium bovis (strain BCG / Pasteur 1173P2) GN=TB11.2 PE=4 SV=1	0	3.89757	39.0476	2	2	2	1	105	11.178	6.37	0	2
FALSE	High	Master Protein	A0A0C7DU20	Heat shock protein hspX OS=Mycobacterium bovis GN=MBO1_00993 PE=3 SV=1	0	3.87614	22.3602	2	2	2	1	161	18.333	5.91	2.26995	2
FALSE	High	Master Protein	A0A0C7DQV3	Uncharacterized protein OS=Mycobacterium bovis GN=BOVR_03895 PE=4 SV=1	0	3.85405	14.3564	2	2	2	1	202	22.517	4.75	3.9436	2
FALSE	High	Master Protein	A0A0H3MGE6	Probable transcriptional repressor sirR OS=Mycobacterium bovis (strain BCG / Pasteur 1173P2) GN=sirR PE=4 SV=1	0	3.81618	15.7895	2	2	2	1	228	24.892	5.36	2.50828	2
FALSE	High	Master Protein	P66947	Probable acetolactate synthase OS=Mycobacterium bovis (strain ATCC BAA-935 / AF2122/97) GN=ilvG PE=3 SV=1	0	3.79033	7.49543	2	2	2	1	547	57.484	5.9	3.1975	2
FALSE	High	Master Protein	A0A0H3MB98	Uncharacterized protein OS=Mycobacterium bovis (strain BCG / Pasteur 1173P2) GN=BCG_1906c PE=4 SV=1	0	3.76822	13.964	2	2	2	1	222	24.323	10.14	3.83724	2
FALSE	High	Master Protein	A0A093MQQ1	Guanylate cyclase OS=Mycobacterium bovis GN=BOVR_08575 PE=4 SV=1	0	3.74111	11.315	2	2	2	1	327	35.197	9.69	4.22672	2
FALSE	High	Master Protein	A0A093JK57	Growth inhibitor PemK OS=Mycobacterium bovis GN=BOVR_12460 PE=4 SV=1	0	3.73523	12.5	2	2	2	1	200	22.503	9.19	3.60101	2
FALSE	High	Master Protein	A0A0H3M862	Probable aldehyde dehydrogenase aldC OS=Mycobacterium bovis (strain BCG / Pasteur 1173P2) GN=aldC PE=3 SV=1	0	3.70318	9.67033	2	2	2	1	455	48.229	5.52	1.82333	2
FALSE	High	Master Protein	A0A0H4Y641	Acyl-CoA dehydrogenase OS=Mycobacterium bovis GN=BOVR_00815 PE=3 SV=1	0	3.69924	9.09091	2	2	2	1	407	44.78	6.89	2.82148	2
FALSE	High	Master Protein	A0A0H3M451	Uncharacterized protein OS=Mycobacterium bovis (strain BCG / Pasteur 1173P2) GN=BCG_0682 PE=4 SV=1	0	3.68807	15.6627	2	2	2	1	83	9.421	5.06	4.04915	2
FALSE	High	Master Protein	A0A0H3MAY7	Segregation and condensation protein B OS=Mycobacterium bovis (strain BCG / Pasteur 1173P2) GN=BCG_1749 PE=3 SV=1	0	3.68612	26.8398	2	2	2	1	231	25.261	4.64	3.03405	2
FALSE	High	Master Protein	P66745	Holliday junction ATP-dependent DNA helicase RuvA OS=Mycobacterium bovis (strain ATCC BAA-935 / AF2122/97) GN=ruvA PE=3 SV=1	0	3.67421	17.8571	2	2	2	1	196	20.177	6.96	1.94204	2
FALSE	High	Master Protein	A0A0C7DJL9	tRNA pseudouridine synthase A OS=Mycobacterium bovis GN=truA PE=3 SV=1	0	3.65877	13.8614	2	2	2	1	303	33.241	9.95	0	2
FALSE	High	Master Protein	A0A083WB19	Fe-S cluster assembly protein SufD OS=Mycobacterium bovis GN=BOVR_07765 PE=4 SV=1	0	3.65807	9.57179	2	2	2	1	397	42.498	5.27	4.60454	2
FALSE	High	Master Protein	G7QWW8	NADH-quinone oxidoreductase subunit C OS=Mycobacterium bovis BCG str. Mexico GN=nuoC PE=3 SV=1	0	3.63623	11.8644	2	2	2	1	236	26.915	5.63	1.60961	2
FALSE	High	Master Protein	A0A0H3P7G1	PUTATIVE CONSERVED ATPASE OS=Mycobacterium bovis (strain ATCC BAA-935 / AF2122/97) GN=Mb0443c PE=3 SV=1	0	3.61139	7.28022	3	3	3	1	728	75.3	5.35	0	3
FALSE	High	Master Protein	A0A083W0M7	tRNA pseudouridine synthase B OS=Mycobacterium bovis GN=truB PE=3 SV=1	0	3.60083	12.7517	2	2	2	1	298	31.8	9.52	4.06886	2
FALSE	High	Master Protein	A0A083W5T3	Oxidoreductase, short-chain dehydrogenase/reducta se family (Probable short-chain type dehydrogenase/reductas e) OS=Mycobacterium bovis GN=BOVR_09780 PE=3 SV=1	0	3.57814	11.9134	2	2	2	1	277	29.991	9.6	2.53095	2
FALSE	High	Master Protein	A0A083WFC9	Conserved protein OS=Mycobacterium bovis GN=BOVR_04520 PE=4 SV=1	0	3.5698	9.52381	2	2	2	1	147	16.335	5.22	3.71747	2
FALSE	High	Master Protein	A0A0C7DMN9	NADH-quinone oxidoreductase subunit A OS=Mycobacterium bovis GN=nuoA PE=3 SV=1	0	3.49846	10.5263	2	2	2	1	171	18.401	9.13	4.08148	2
FALSE	High	Master Protein	A0A0C7DNW3	Oxidoreductase OS=Mycobacterium bovis GN=MBO1_02066 PE=4 SV=1	0	3.45387	15.1724	2	2	2	1	290	31.875	6.6	0	2
FALSE	High	Master Protein	A0A0K2HYA9	Uncharacterized protein OS=Mycobacterium bovis BCG GN=RN06_3009 PE=4 SV=1	0	3.45255	19.8068	2	2	2	1	207	23.021	5.57	1.74361	2
FALSE	High	Master Protein	A0A0H3M7W2	Cell division protein FtsQ OS=Mycobacterium bovis (strain BCG / Pasteur 1173P2) GN=ftsQ PE=3 SV=1	0	3.39756	16.242	2	2	2	1	314	33.913	6.6	2.20743	2
FALSE	High	Master Protein	A1KNE4	NADH-quinone oxidoreductase subunit D OS=Mycobacterium bovis (strain BCG / Pasteur 1173P2) GN=nuoD PE=3 SV=1	0	3.39248	10	2	2	2	1	440	48.133	5.71	2.24481	2
FALSE	High	Master Protein	A0A0C7DDG7	Uncharacterized protein OS=Mycobacterium bovis GN=MBO1_01667 PE=4 SV=1	0	3.37991	25.2252	2	2	2	1	222	24.44	4.48	2.3402	2
FALSE	High	Master Protein	A0A0K2I195	Homoserine O-acetyltransferase OS=Mycobacterium bovis BCG GN=metX PE=3 SV=1	0	3.37378	10.5541	2	2	2	1	379	39.744	5.67	2.25998	2
FALSE	High	Master Protein	A0A0K2HQX9	Oxidative stress response regulatory protein OxyS OS=Mycobacterium bovis BCG GN=RN06_0148 PE=4 SV=1	0	3.36765	15.2866	2	2	2	1	314	34.202	6.04	0	2
FALSE	High	Master Protein	A0A0H3M9X3	Chromosome partition protein Smc OS=Mycobacterium bovis (strain BCG / Pasteur 1173P2) GN=smc PE=3 SV=1	0	3.36388	1.90871	2	2	2	1	1205	130.502	5.26	1.85301	2
FALSE	High	Master Protein	A0A0Y1BRN8	L-threonine dehydratase OS=Mycobacterium bovis BCG GN=ilvA PE=3 SV=1	0	3.34725	8.52535	2	2	2	1	434	45.814	4.78	1.62412	2
FALSE	High	Master Protein	A0A0H3P749	Conserved alanine and valine and glycine rich protein OS=Mycobacterium bovis (strain ATCC BAA-935 / AF2122/97) GN=Mb2708c PE=3 SV=1	0	3.34625	9.87654	2	2	2	1	405	43.215	7.02	0	2
FALSE	High	Master Protein	A0A0C7DBH1	Uncharacterized protein OS=Mycobacterium bovis GN=MBO1_01083 PE=4 SV=1	0	3.32984	17.0543	2	2	2	1	258	28.667	10.33	3.69105	2
FALSE	High	Master Protein	A0A0H3P6E8	Conserved protein OS=Mycobacterium bovis (strain ATCC BAA-935 / AF2122/97) GN=Mb3708 PE=4 SV=1	0	3.32238	8.15047	2	2	2	1	319	34.373	9.04	2.15803	2
FALSE	High	Master Protein	A0A0H3P6C6	Possible oxidoreductase. possible 3-hydroxy-9,10-seconandrost-1,3,5(10)-triene-9,17-dione hydroxylase OS=Mycobacterium bovis (strain ATCC BAA-935 / AF2122/97) GN=hsaa PE=4 SV=1	0	3.27655	12.4365	2	2	2	1	394	43.117	6.34	2.01009	2
FALSE	High	Master Protein	A0A083W026	Thymidylate synthase OS=Mycobacterium bovis GN=thyA PE=3 SV=1	0	3.2366	10.5263	2	2	2	1	266	30.133	5.74	1.6169	2
FALSE	High	Master Protein	A0A0H3P2U4	Mycothiol S-conjugate amidase OS=Mycobacterium bovis (strain ATCC BAA-935 / AF2122/97) GN=mca PE=3 SV=1	0	3.2364	13.5417	2	2	2	1	288	32.711	5.27	1.99734	2
FALSE	High	Master Protein	A0A083W4C8	Putative membrane protein OS=Mycobacterium bovis GN=BOVR_09970 PE=4 SV=1	0	3.22739	12.892	2	2	2	1	287	31.943	9.69	2.03383	2
FALSE	High	Master Protein	A0A083VRR3	Galactofuranosyl transferase OS=Mycobacterium bovis GN=BOVR_19710 PE=4 SV=1	0	3.17807	12.1711	2	2	2	1	304	33.843	9.04	4.22882	2
FALSE	High	Master Protein	A1KMJ5	Probable malate:quinone oxidoreductase OS=Mycobacterium bovis (strain BCG / Pasteur 1173P2) GN=mqo PE=3 SV=1	0	3.1509	7.09939	2	2	2	1	493	53.562	8.95	3.9433	2
FALSE	High	Master Protein	A0A0H3P3C1	Conserved protein OS=Mycobacterium bovis (strain ATCC BAA-935 / AF2122/97) GN=Mb1663c PE=4 SV=1	0	3.13898	10.9848	2	2	2	1	264	27.919	5.68	1.95769	2
FALSE	High	Master Protein	A0A083WHS5	Galactokinase OS=Mycobacterium bovis GN=galK PE=3 SV=1	0	3.12194	8.26446	2	2	2	1	363	37.549	6.37	0	2
FALSE	High	Master Protein	C1AKN5	2-succinyl-5-enolpyruvyl-6-hydroxy-3-cyclohexene-1-carboxylate synthase OS=Mycobacterium bovis (strain BCG / Tokyo 172 / ATCC 35737 / TMC 1019) GN=menD PE=3 SV=1	0	3.10284	9.38628	2	2	2	1	554	57.8	6.8	0	2
FALSE	High	Master Protein	A0A0D1NPI9	Uncharacterized protein OS=Mycobacterium bovis GN=BOVR_03205 PE=4 SV=1	0	3.09247	6.19883	2	2	2	1	855	92.696	4.63	2.33908	2
FALSE	High	Master Protein	A0A0H4FW38	Uncharacterized protein OS=Mycobacterium bovis BCG GN=RN06_3886 PE=4 SV=1	0	3.09159	35.7895	2	2	2	1	95	9.884	4.97	0	2
FALSE	High	Master Protein	A0A0M5LD87	DNA primase OS=Mycobacterium bovis GN=dnaG PE=3 SV=1	0	3.08625	6.72926	2	2	2	1	639	69.648	6.96	4.06517	2
FALSE	High	Master Protein	A0A0H3M745	Probable ferredoxin-dependant nitrite reductase nirA OS=Mycobacterium bovis (strain BCG / Pasteur 1173P2) GN=nirA PE=3 SV=1	0	3.08512	9.59147	2	2	2	1	563	62.958	6.46	2.29663	2
FALSE	High	Master Protein	A0A0C7DQM4	Probable transcriptional regulatory protein (Poss ibly ArsR-family) OS=Mycobacterium bovis GN=MBO1_00407 PE=4 SV=1	0	3.08083	8.29493	2	2	2	1	434	46.36	6.04	2.18037	2
FALSE	High	Master Protein	A0A0H3P8M2	POSSIBLE SECRETED PROTEASE OS=Mycobacterium bovis (strain ATCC BAA-935 / AF2122/97) GN=Mb2691 PE=4 SV=1	0	3.063	6.06061	2	2	2	1	528	53.96	5.06	0	2
FALSE	High	Master Protein	A0A0G2Q9J0	Probable transcriptional regulatory protein (Probably asnC-family) OS=Mycobacterium bovis (strain BCG / Pasteur 1173P2) GN=BCG_3320c PE=4 SV=1	0	3.05001	11.3333	2	2	2	1	150	16.529	5.58	0	2
FALSE	High	Master Protein	A0A083W579	Conserved protein OS=Mycobacterium bovis GN=MBO1_01098 PE=4 SV=1	0	3.02103	17.8571	2	2	2	1	196	20.782	4.78	1.76172	2
FALSE	High	Master Protein	A0A0H3M2P5	MCE-family protein mce1B OS=Mycobacterium bovis (strain BCG / Pasteur 1173P2) GN=mce1B PE=4 SV=1	0	3.01309	7.22543	2	2	2	1	346	37.692	8.91	1.76932	2
FALSE	High	Master Protein	A0A083W629	Conserved protein TB16.3 OS=Mycobacterium bovis GN=BOVR_11305 PE=4 SV=1	0	3.00005	16.6667	2	2	2	1	144	16.314	4.86	0	2
FALSE	High	Master Protein	A0A0C7DHH1	Lipoprotein LpqB OS=Mycobacterium bovis GN=lpqB PE=3 SV=1	0	2.98084	8.8586	2	2	2	1	587	61.611	5.49	2.30703	2
FALSE	High	Master Protein	A0A0C7D9Z3	Uncharacterized protein OS=Mycobacterium bovis GN=MBO1_00100 PE=4 SV=1	0	2.97945	17.1429	2	2	2	1	175	19.537	7.37	1.77541	2
FALSE	High	Master Protein	A0A083WMH4	Oxidoreductase OS=Mycobacterium bovis GN=BOVR_00860 PE=4 SV=1	0	2.95864	7.34967	2	2	2	1	449	47.326	6.28	2.10981	2
FALSE	High	Master Protein	A0A0H4XUG3	Diacylglycerol O-acyltransferase OS=Mycobacterium bovis GN=BOVR_16770 PE=3 SV=1	0	2.95675	7.24947	2	2	2	1	469	50.964	8.15	0	2
FALSE	High	Master Protein	A0A0C7DFV1	Transcriptional regulator, asnC-family OS=Mycobacterium bovis GN=MBO1_02582 PE=4 SV=1	0	2.94114	11.0236	2	2	2	1	254	28.497	7.69	2.16593	2
FALSE	High	Master Protein	A0A0H3MCN7	Putative 3-oxoacyl-[acyl-carrier protein] reductase fabG2 OS=Mycobacterium bovis (strain BCG / Pasteur 1173P2) GN=fabG2 PE=4 SV=1	0	2.93109	13.3603	2	2	2	1	247	25.854	8.16	2.03863	2
FALSE	High	Master Protein	A0A083VXS0	NADH dehydrogenase OS=Mycobacterium bovis GN=BOVR_16300 PE=4 SV=1	0	2.92759	18.6508	2	2	2	1	252	27.181	4.97	0	2
FALSE	High	Master Protein	A0A0C7DKF9	Nicotinate-nucleotide pyrophosphorylase (EC 2.4.2.19) OS=Mycobacterium bovis GN=MBO1_03387 PE=3 SV=1	0	2.92153	19.5122	2	3	2	1	287	30.178	5.17	2.41604	2
FALSE	High	Master Protein	A0A093PMK8	Hydroxymethylpyrimidine/phosphomethylpyrimidine kinase OS=Mycobacterium bovis GN=BOVR_02195 PE=4 SV=1	0	2.86025	11.2727	2	2	2	1	275	28.547	5.73	0	2
FALSE	High	Master Protein	A0A0H3P634	MCE-FAMILY PROTEIN MCE4B OS=Mycobacterium bovis (strain ATCC BAA-935 / AF2122/97) GN=mce4B PE=4 SV=1	0	2.85949	12.5714	2	2	2	1	350	36.858	7.97	2.09538	2
FALSE	High	Master Protein	A0A0H3M3B6	Possible GTP-binding translation elongation factor typA OS=Mycobacterium bovis (strain BCG / Pasteur 1173P2) GN=typA PE=4 SV=1	0	2.85839	6.84713	2	2	2	1	628	67.538	5.78	2.1992	2
FALSE	High	Master Protein	A0A0H3MCU8	Probable amino acid decarboxylase OS=Mycobacterium bovis (strain BCG / Pasteur 1173P2) GN=BCG_2553c PE=4 SV=1	0	2.82238	5.59662	2	2	2	1	947	105.963	5.74	0	2
FALSE	High	Master Protein	Q7U055	Carbamoyl-phosphate synthase small chain OS=Mycobacterium bovis (strain ATCC BAA-935 / AF2122/97) GN=carA PE=3 SV=1	0	2.77448	8.24468	2	2	2	1	376	39.728	6.33	0	2
FALSE	High	Master Protein	A0A0H3MF17	Probable exported protease OS=Mycobacterium bovis (strain BCG / Pasteur 1173P2) GN=BCG_2241c PE=4 SV=1	0	2.7437	5.96154	2	2	2	1	520	55.889	6.19	0	2
FALSE	High	Master Protein	A0A109S6G3	Enoyl-CoA hydratase EchA5 OS=Mycobacterium bovis BCG GN=RN06_0837 PE=3 SV=1	0	2.66558	7.79221	2	2	2	1	308	32.543	11.21	0	2
FALSE	High	Master Protein	A0A0K2HVX5	Cytidylate kinase OS=Mycobacterium bovis BCG GN=cmk PE=3 SV=1	0	2.64692	16.087	2	2	2	1	230	24.163	5.24	3.52427	2
FALSE	High	Master Protein	A0A0C7DTL7	3-oxosteroid 1-dehydrogenase (3-ket o-Delta(4)-steroid Delta(1)-dehydrogenase) (KSDD) (3-oxo-De lta(4)-steroid 1-dehydrogenase) (KSTD) OS=Mycobacterium bovis GN=MBO_303521 PE=4 SV=1	0	2.63485	7.28242	2	2	2	1	563	60.57	8.19	1.64824	2
FALSE	High	Master Protein	A0A0H3M4G4	Probable dehydrogenase FAD flavoprotein gmc oxidoreductase OS=Mycobacterium bovis (strain BCG / Pasteur 1173P2) GN=BCG_1338 PE=3 SV=1	0	2.61859	5.30303	2	2	2	1	528	57.295	7.31	1.90366	2
FALSE	High	Master Protein	A0A0K2HSX2	Putative glutamate--cysteine ligase 2 OS=Mycobacterium bovis BCG GN=RN06_0537 PE=3 SV=1	0	2.50375	12.0104	2	2	2	1	383	42.936	5.92	0	2
FALSE	High	Master Protein	Q7VET8	Glycine dehydrogenase (decarboxylating) OS=Mycobacterium bovis (strain ATCC BAA-935 / AF2122/97) GN=gcvP PE=3 SV=1	0	2.43912	5.41977	2	2	2	1	941	99.39	5.62	0	2
FALSE	High	Master Protein	A0A0K2I0S3	Uncharacterized protein OS=Mycobacterium bovis BCG GN=RN06_3955 PE=4 SV=1	0	2.39487	28.0488	2	2	2	1	246	25.485	4.94	3.06878	2
FALSE	High	Master Protein	A0A0H4XYH9	50S ribosomal protein L28 OS=Mycobacterium bovis GN=rpmB PE=3 SV=1	0	2.38881	15.625	2	2	2	1	64	6.9	10.98	3.99979	2
FALSE	High	Master Protein	A0A0C7DP32	ATPase OS=Mycobacterium bovis GN=MBO1_01799 PE=4 SV=1	0	2.30793	8.3871	2	2	2	1	310	33.805	5.35	0	2
FALSE	High	Master Protein	A0A0C7DFE9	Proline-rich antigen pra OS=Mycobacterium bovis GN=MBO1_02302 PE=4 SV=1	0	2.29968	14.2857	2	2	2	1	245	25.561	6.51	4.21964	2
FALSE	High	Master Protein	A0A0C7DM19	Uncharacterized protein OS=Mycobacterium bovis GN=MBO1_03071 PE=4 SV=1	0	2.25124	16.7939	2	2	2	1	262	28.639	5.71	0	2
